# Supplementary material for: Controlling cyclization pathways in palladium(ii)-catalyzed intramolecular alkene hydro-functionalization via substrate directivity
Source: PubMed Central journal article supplement — Chem Sci. 2020 Sep 22;11(41):11307–14. doi: 10.1039/d0sc03409f (PMC8914520; doi:10.1039/d0sc03409f), 2020-09-22
Supplement: SC-011-D0SC03409F-s239.pdf [file SC-011-D0SC03409F-s239.pdf]

## SUPPORTING INFORMATION

### Controlling Cyclization Pathways in Palladium(II)-Catalyzed Intramolecular Alkene Hydrofunctionalization via Substrate Directivity

Xin Wang,<sup>[a],[b],[d]</sup> Zi-Qi Li,<sup>[a],[d]</sup> Binh Khanh Mai,<sup>[c],[d]</sup> John A. Gurak, Jr.,<sup>[a]</sup> Jessica E. Xu,<sup>[a]</sup> Van T. Tran,<sup>[a]</sup> Hui-Qi Ni,<sup>[a]</sup> Zhen Liu,<sup>[a]</sup> Zhonglin Liu,<sup>[a]</sup> Kin S. Yang,<sup>[a]</sup> Rong Xiang,<sup>[b]</sup> Peng Liu,<sup>[b]\*</sup> and Keary M. Engle<sup>[a]\*</sup>

[a] Department of Chemistry, Scripps Research, 10550 North Torrey Pines Road, La Jolla, California 92037, United States

[b] Department of Medicinal Chemistry, School of Medicine, Nankai University, Tianjin, China

[c] Department of Chemistry, University of Pittsburgh, Pittsburgh, Pennsylvania 15260, United States

\*pengliu@pitt.edu; keary@scripps.edu

#### Table of Contents

|                                                                            |     |
|----------------------------------------------------------------------------|-----|
| General Information .....                                                  | S2  |
| Experimental Procedures .....                                              | S3  |
| Substrates Synthesis .....                                                 | S3  |
| General Procedure C for Alkene Intramolecular Hydrofunctionalization ..... | S18 |
| Computational Details.....                                                 | S37 |
| References .....                                                           | S42 |
| NMR Spectra.....                                                           | S44 |
| Cartesian Coordinates .....                                                | S65 |

## General Information

Unless otherwise noted, all materials were used as received from commercial sources without further purification. All commercial reagents and solvents were purchased from Aldrich, Alfa Aesar, Oakwood, and Combi-Blocks. Pd(OAc)<sub>2</sub> was obtained from Johnson Matthey. NMR spectra were recorded on Bruker AV-400, DRX-500 and AV-600 instruments. <sup>1</sup>H and <sup>13</sup>C spectra were internally referenced to SiMe<sub>4</sub> or solvent signals. The following abbreviations (or combinations thereof) were used to explain multiplicities: s = singlet, d = doublet, t = triplet, q = quartet, p = pentet, sept = septet, m = multiplet. High-resolution mass spectra (HRMS) were recorded on an Agilent LC/MSD TOF mass spectrometer by electrospray ionization time of flight experiments.

## Experimental Procedures

### Substrates Synthesis

Table S1. Substrates 1c-1ee.

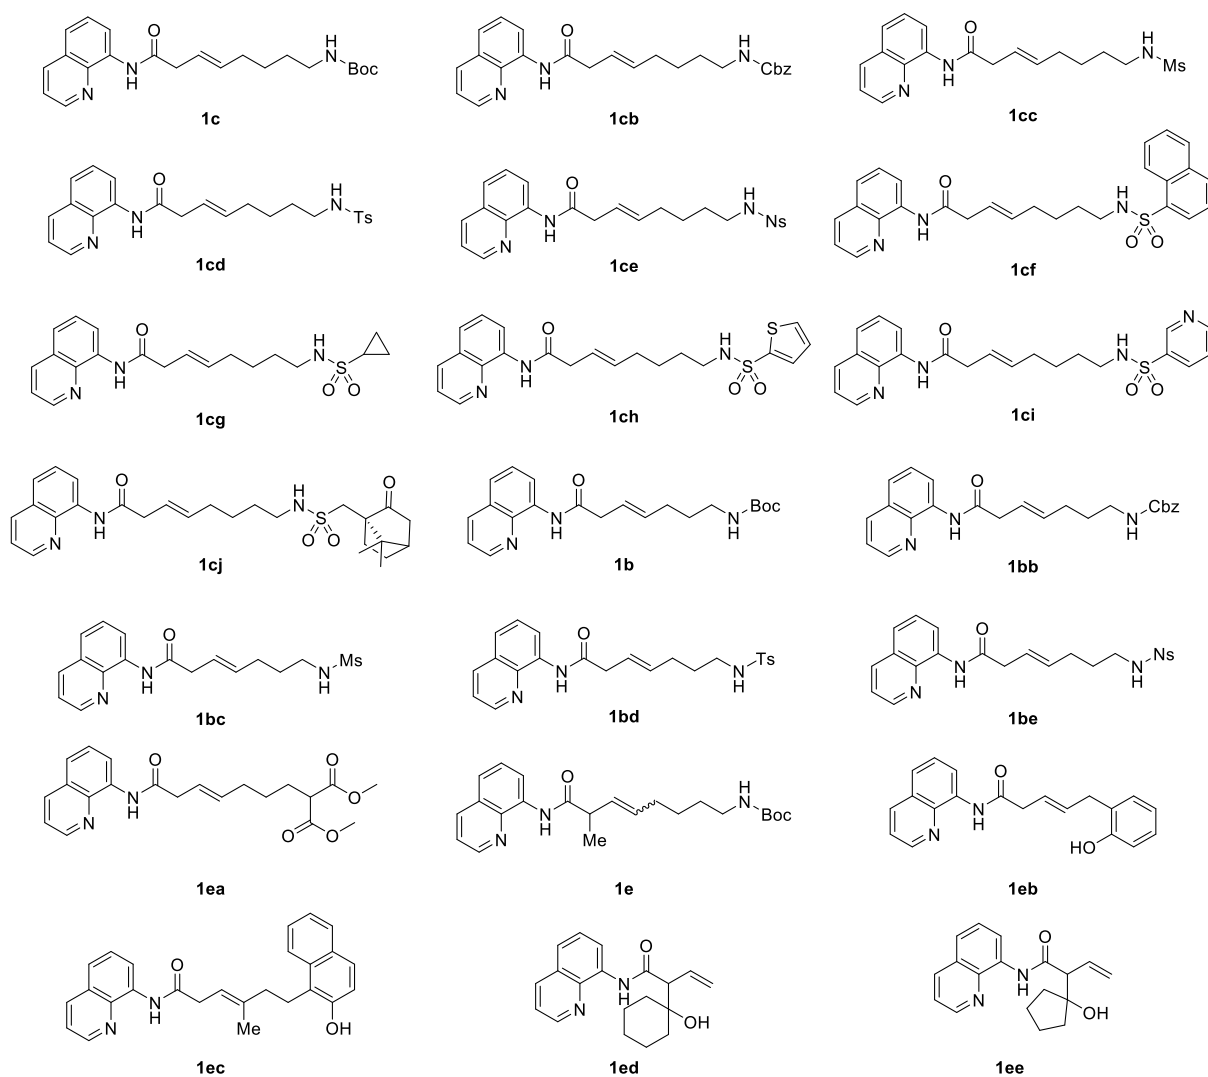

Substrates 1c-1ee were prepared according to adapted literature procedures.<sup>[1-7]</sup>

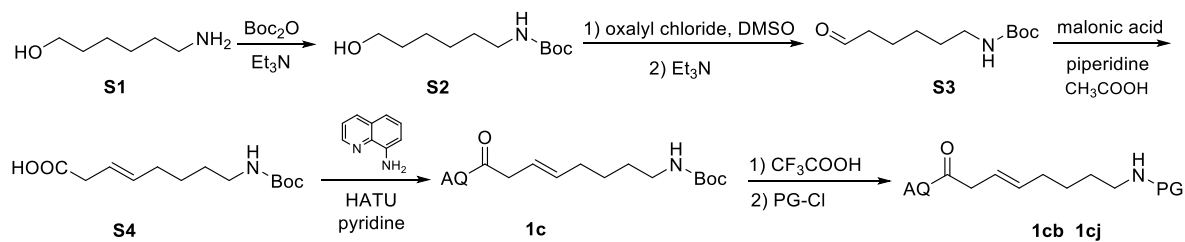

**Scheme S1:** Synthesis of substrates containing a nitrogen nucleophile [N–H] for 6-exo-trig cyclization (**1c–1cj**).

**2-(5-hydroxypentyl)isoindoline-1,3-dione (S2):** To a 250-mL round-bottom flask equipped with a magnetic stir bar were added commercially available 6-aminohexan-1-ol (2.8 g, 24 mmol) and di-*tert*-butyl dicarbonate (5.2 g, 24 mmol) in CH<sub>2</sub>Cl<sub>2</sub> (100 mL). Next, Et<sub>3</sub>N (2.7 g, 26 mmol) was added dropwise. The reaction mixture was stirred at room temperature for 2 h. After that time, the solvent was removed *in vacuo*. Purification using silica gel column chromatography with 1:1 hexanes:EtOAc as the eluent gave the product as a colorless oil (5.0 g, 96% yield). <sup>1</sup>H NMR (500 MHz, CDCl<sub>3</sub>) δ 4.58 (s, 1H), 3.61 (q, *J* = 4.8, 3.3 Hz, 2H), 3.09 (q, *J* = 6.7 Hz, 2H), 1.83 (s, 1H), 1.56–1.52 (m, 2H), 1.48–1.44 (m, 2H), 1.42 (s, 9H), 1.37–1.31 (m, 4H); <sup>13</sup>C NMR (125 MHz, CDCl<sub>3</sub>) δ 156.2, 79.2, 62.7, 40.5, 32.7, 30.2, 28.5, 26.5, 25.4.

**tert-butyl (6-oxohexyl)carbamate (S3):** A solution of DMSO (3.4 mL, 48 mmol) in dry DCM (20 mL) was added dropwise to a solution of oxalyl chloride (3.0 mL, 35 mmol) in dry DCM (100 mL) at –78 °C, and the resulting mixture was stirred for 15 min. To this reaction mixture, was added dropwise a solution of **S2** (5.0 g, 23 mmol) in dry DCM (50 mL) at –78 °C, and the resulting solution was stirred for another 30 min. Et<sub>3</sub>N (12 g, 120 mmol) was then added, and the solution was slowly warmed to room temperature before treated with sat. NH<sub>4</sub>Cl. The organic layer was separated, washed with sat. NaHCO<sub>3</sub> (100 mL, ×1) and brine (100 mL, ×1), dried over anhydrous Na<sub>2</sub>SO<sub>4</sub>, and concentrated to afford **S3** as a colorless oil, which was purified quickly by silica gel column chromatography with 1:1 hexanes:EtOAc as eluent. <sup>1</sup>H NMR (500 MHz, CDCl<sub>3</sub>) δ 9.74 (t, *J* = 1.7 Hz, 1H), 4.55 (s, 1H), 3.10 (q, *J* = 6.8 Hz, 2H), 2.42 (td, *J* = 7.3, 1.7 Hz, 2H), 1.65–1.61 (m, 2H), 1.48–1.46 (m, 2H), 1.42 (s, 9H), 1.36–1.31 (m, 2H); <sup>13</sup>C NMR (125 MHz, CDCl<sub>3</sub>) δ 202.6, 156.1, 79.2, 43.9, 40.4, 30.0, 28.5, 26.4, 21.8.

**(E)-8-((*tert*-butoxycarbonyl)amino)oct-3-enoic acid (S4):** To a solution of **S3** (3.4 g, 16 mmol) and malonic acid (1.8 g, 17 mmol) in DMSO (8 mL) were added piperidine (10 μL) and acetic acid (6 μL). The reaction mixture was heated to 100 °C while stirring over 8 h. The reaction solution was cooled to room temperature, quenched with brine, and extracted with EtOAc. The organic layer was separated, dried over anhydrous Na<sub>2</sub>SO<sub>4</sub>, and concentrated *in vacuo*. Purification using silica gel column chromatography with 1:1 hexanes:EtOAc as the eluent gave the product as a colorless oil (3.1 g, 76% yield). <sup>1</sup>H NMR (500 MHz, DMSO-*d*<sub>6</sub>) δ 12.11 (s, 1H), 6.75 (t, *J* = 6.3 Hz, 1H), 5.53–5.41 (m, 2H), 2.93 (d, *J* = 5.6 Hz, 2H), 2.89 (q, *J* = 6.5 Hz, 2H), 2.00–1.93 (m, 2H), 1.36 (m, 11H), 1.33–1.25 (m, 2H); <sup>13</sup>C NMR (150 MHz, DMSO-*d*<sub>6</sub>) δ 172.9, 155.6, 133.1, 122.9, 77.3, 37.6, 31.6, 29.0, 28.3, 26.0.

**tert-butyl (E)-(8-oxo-8-(quinolin-8-ylamino)oct-5-en-1-yl)carbamate (1c):** The carboxylic acid **S4** (3.2 g, 12.4 mmol) was charged into a 200-mL round-bottom flask equipped with a Teflon-coated magnetic stir bar containing DCM (80 mL). 8-Aminoquinoline (1.7 g, 12 mmol), pyridine (1.9 mL, 24 mmol), and HATU (6.7 g, 18 mmol) were added sequentially, and the reaction was stirred at ambient temperature for 20 h. The deep brown solution was diluted with

EtOAc (80 mL), washed with sat. NaHCO<sub>3</sub> (50 mL, ×2) and brine (50 mL, ×1), and dried over Na<sub>2</sub>SO<sub>4</sub>. The solvent was removed under vacuum and the resulting residue was purified by column chromatography (10:1 to 5:1 hexanes:EtOAc) to afford the substrate **1a** as a colorless oil. <sup>1</sup>H NMR (500 MHz, CDCl<sub>3</sub>) δ 10.03 (s, 1H), 8.79–8.76 (m, 2H), 8.15 (dd, *J* = 8.2, 1.7 Hz, 1H), 7.55–7.49 (m, 2H), 7.45 (dd, *J* = 8.3, 4.2 Hz, 1H), 5.83–5.72 (m, 2H), 4.51 (s, 1H), 3.29–3.26 (m, 2H), 3.15 (d, *J* = 6.9 Hz, 2H), 2.18 (q, *J* = 6.6 Hz, 2H), 1.58–1.51 (m, 4H), 1.43 (s, 9H); <sup>13</sup>C NMR (150 MHz, CDCl<sub>3</sub>) δ 170.1, 156.1, 148.3, 138.7, 136.6, 136.5, 134.6, 128.1, 127.5, 122.9, 121.7, 121.7, 116.5, 79.2, 42.3, 40.6, 32.4, 29.7, 28.6, 26.5; HRMS (ESI-TOF) Calcd for C<sub>22</sub>H<sub>30</sub>N<sub>3</sub>O<sub>3</sub><sup>+</sup> [M+H] 384.2287, found 384.2288.

**General Procedure A for preparation of 1cb–1cj:** To a 25-mL round-bottom flask equipped with a magnetic stir bar was added the substrate **1c** (1.0 equiv) in DCM. The reaction mixture was cooled to 0 °C before treatment with trifluoroacetic acid. After stirring for 1 h, the reaction mixture was concentrated *in vacuo*. The residue was diluted with EtOAc, washed with sat. NaHCO<sub>3</sub> and brine, dried over anhydrous Na<sub>2</sub>SO<sub>4</sub>. The solution was filtered through a plug of celite, and the filtrate was concentrated under vacuum to afford a light-yellow oil, which was carried on to the next step without further purification. The residue was dissolved in THF (10 mL), which was cooled to 0 °C. Et<sub>3</sub>N (1.2 equiv) and benzyl carbonylchloridate or RSO<sub>2</sub>Cl (1.0 equiv) were added sequentially in a dropwise fashion. The reaction mixture was slowly warmed to room temperature and stirred for an additional 2 h. After removal of the solvent *in vacuo*, purification using silica gel column chromatography with hexanes:EtOAc as the eluent gave the product as a light-yellow solid or oil.

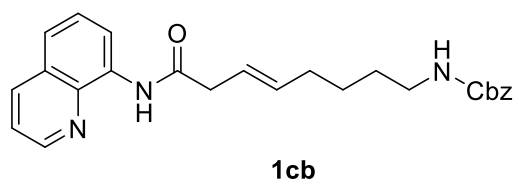

**benzyl (E)-(8-oxo-8-(quinolin-8-ylamino)oct-5-en-1-yl)carbamate (1cb):** The title compound was prepared from substrate **1c** (383 mg, 1.0 mmol) and benzyl carbonylchloridate (171 mg, 1.0 mmol) according to General Procedure A. Purification

using silica gel column chromatography with 3:1 hexane:EtOAc as the eluent gave the product as a light-yellow oil (293 mg, 70% yield). <sup>1</sup>H NMR (500 MHz, CDCl<sub>3</sub>) δ 10.02 (s, 1H), 8.79–8.75 (m, 2H), 8.13 (dd, *J* = 8.3, 1.7 Hz, 1H), 7.54–7.48 (m, 2H), 7.41 (dd, *J* = 8.3, 4.2 Hz, 1H), 7.34 (m, 4H), 7.32–7.28 (m, 1H), 5.77 (dt, *J* = 11.9, 6.4 Hz, 2H), 5.08 (s, 2H), 4.76 (s, 1H), 3.27 (d, *J* = 6.1 Hz, 2H), 3.23 (q, *J* = 6.6 Hz, 2H), 2.18 (q, *J* = 6.8 Hz, 2H), 1.62–1.51 (m, 4H); <sup>13</sup>C NMR (125 MHz, CDCl<sub>3</sub>) δ 170.1, 156.5, 148.3, 138.7, 136.8, 136.4, 134.6, 128.6, 128.2, 128.2, 128.1, 127.5, 123.0, 121.7, 121.7, 116.5, 66.7, 42.2, 41.1, 32.4, 29.6, 26.4; HRMS (ESI-TOF) Calcd for C<sub>25</sub>H<sub>28</sub>N<sub>3</sub>O<sub>3</sub><sup>+</sup> [M+H] 418.2131, found 418.2129.

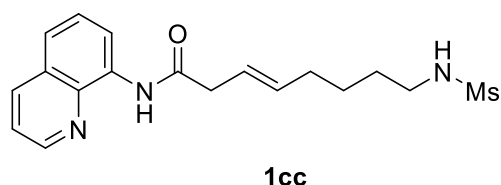

**(E)-8-(methylsulfonamido)-N-(quinolin-8-yl)oct-3-enamide (1cc):** The title compound was prepared from substrate **1c** (383 mg, 1.0 mmol), methanesulfonyl chloride (115 mg, 1.0 mmol) according to General Procedure A. Purification

using silica gel column chromatography with 1:1 hexane:EtOAc as the eluent gave the product as a light-yellow solid (224 mg, 62% yield). <sup>1</sup>H NMR (600 MHz, CDCl<sub>3</sub>) δ 10.00 (s, 1H), 8.80 (dd, *J* = 4.3, 1.6 Hz, 1H), 8.76 (dd, *J* = 7.4, 1.5 Hz, 1H), 8.16 (dd, *J* = 8.2, 1.7 Hz, 1H), 7.55–7.49 (m, 2H), 7.46 (dd, *J* = 8.3, 4.2 Hz, 1H), 5.77 (ddd, *J* = 6.2, 4.9, 4.0 Hz, 2H), 4.28 (s, 1H), 3.30–3.27 (m, 2H), 3.16 (q, *J* = 6.7 Hz, 2H), 2.93 (s, 3H), 2.20 (td, *J* = 7.2, 5.1 Hz, 2H), 1.69–1.63 (m, 2H), 1.57 (dq, *J* = 10.0, 7.2 Hz, 2H); <sup>13</sup>C NMR (150 MHz, CDCl<sub>3</sub>) δ 170.0, 148.4, 138.6, 136.5, 135.9, 134.5, 128.1, 127.5,

123.4, 121.8, 121.6, 116.5, 43.3, 42.2, 40.4, 32.2, 29.7, 26.2; **HRMS** (ESI-TOF) Calcd for  $C_{18}H_{24}N_3O_3S^+$  [M+H] 362.1538, found 362.1534.

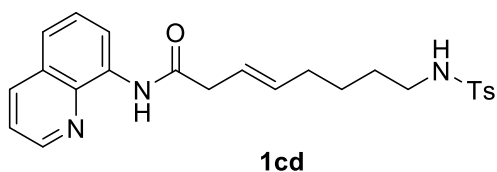

**(E)-8-((4-methylphenyl)sulfonamido)-N-(quinolin-8-yl)oct-3-enamide (1cd):** The title compound was prepared from substrate **1c** (383 mg, 1.0 mmol), 4-methylbenzenesulfonyl chloride (191mg, 1.0 mmol) according to General Procedure

A. Purification using silica gel column chromatography with 3:1 hexane:EtOAc as the eluent gave the product as a light-yellow solid (271 mg, 62% yield). **<sup>1</sup>H NMR** (600 MHz,  $CDCl_3$ )  $\delta$  9.99 (s, 1H), 8.78 (dd,  $J = 4.2, 1.7$  Hz, 1H), 8.76 (dd,  $J = 7.3, 1.6$  Hz, 1H), 8.16 (dd,  $J = 8.2, 1.7$  Hz, 1H), 7.72 (d,  $J = 8.2$  Hz, 2H), 7.55–7.49 (m, 2H), 7.46 (dd,  $J = 8.3, 4.2$  Hz, 1H), 7.28 (d,  $J = 8.0$  Hz, 2H), 5.76–5.65 (m, 2H), 4.43 (t,  $J = 6.2$  Hz, 1H), 3.25 (d,  $J = 5.7$  Hz, 2H), 2.96 (q,  $J = 6.7$  Hz, 2H), 2.41 (s, 3H), 2.11 (td,  $J = 7.0, 5.3$  Hz, 2H), 1.55 (dq,  $J = 10.9, 6.8$  Hz, 2H), 1.51–1.46 (m, 2H); **<sup>13</sup>C NMR** (150 MHz,  $CDCl_3$ )  $\delta$  170.0, 148.4, 146.4, 143.5, 138.6, 137.1, 136.5, 136.1, 134.5, 129.8, 127.5, 127.2, 123.2, 121.8, 121.7, 116.5, 43.2, 42.2, 32.1, 29.1, 26.1, 21.6; **HRMS** (ESI-TOF) Calcd for  $C_{24}H_{28}N_3O_3S^+$  [M+H] 438.1851, found 438.1849.

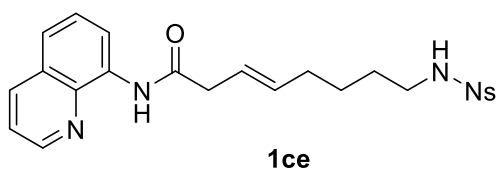

**(E)-8-((4-nitrophenyl)sulfonamido)-N-(quinolin-8-yl)oct-3-enamide (1ce):** The title compound was prepared from substrate **1c** (383 mg, 1.0 mmol), 4-nitrobenzenesulfonyl chloride (235 mg, 1.0 mmol) according to General Procedure A.

Purification using silica gel column chromatography with 3:1 hexane:EtOAc as the eluent gave the product as a light-yellow oil (271 mg, 62% yield). **<sup>1</sup>H NMR** (600 MHz,  $CDCl_3$ )  $\delta$  9.95 (s, 1H), 8.79 (dd,  $J = 4.2, 1.7$  Hz, 1H), 8.75 (dd,  $J = 7.2, 1.8$  Hz, 1H), 8.35–8.30 (m, 2H), 8.17 (dd,  $J = 8.3, 1.7$  Hz, 1H), 8.05–8.00 (m, 2H), 7.58–7.49 (m, 2H), 7.46 (dd,  $J = 8.3, 4.2$  Hz, 1H), 5.75–5.67 (m, 2H), 4.80 (t,  $J = 6.1$  Hz, 1H), 3.27 (dd,  $J = 4.9, 1.5$  Hz, 2H), 3.04 (q,  $J = 6.7$  Hz, 2H), 2.14 (q,  $J = 6.9$  Hz, 2H), 1.62–1.57 (m, 2H), 1.55–1.46 (m, 2H); **<sup>13</sup>C NMR** (150 MHz,  $CDCl_3$ )  $\delta$  170.1, 150.1, 148.4, 146.2, 138.6, 136.6, 135.7, 134.5, 128.4, 128.1, 127.6, 124.5, 123.5, 121.8, 121.8, 116.6, 43.3, 42.0, 32.0, 29.1, 25.8; **HRMS** (ESI-TOF) Calcd for  $C_{23}H_{25}N_4O_5S^+$  [M+H] 469.1546, found 469.1542.

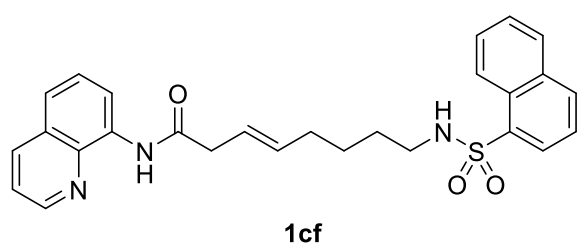

**(E)-8-((naphthalen-1-yl)sulfonamido)-N-(quinolin-8-yl)oct-3-enamide (1cf):** The title compound was prepared from substrate **1c** (500 mg, 1.3 mmol), 4-naphthalene-1-sulfonyl chloride (297 mg, 1.3 mmol) according to General Procedure A. Purification using silica gel column chromatography with 1:1 hexane:EtOAc as the eluent gave the product

as a light-yellow oil (500 mg, 81% yield). **<sup>1</sup>H NMR** (600 MHz,  $CDCl_3$ )  $\delta$  9.95 (s, 1H), 8.79–8.73 (m, 2H), 8.42 (d,  $J = 1.4$  Hz, 1H), 8.14 (dd,  $J = 8.2, 1.7$  Hz, 1H), 7.93 (d,  $J = 8.5$  Hz, 2H), 7.89 (dd,  $J = 8.3, 1.2$  Hz, 1H), 7.81 (dd,  $J = 8.6, 1.9$  Hz, 1H), 7.61 (dddd,  $J = 24.8, 8.1, 6.9, 1.3$  Hz, 2H), 7.56–7.47 (m, 2H), 7.43 (dd,  $J = 8.2, 4.2$  Hz, 1H), 5.70–5.60 (m, 2H), 4.60 (t,  $J = 6.2$  Hz, 1H), 3.22–3.17 (m, 2H), 3.02 (q,  $J = 6.7$  Hz, 2H), 2.08 (td,  $J = 7.3, 5.3$  Hz, 2H), 1.59–1.51 (m, 2H), 1.47 (dq,  $J = 9.5, 7.1$  Hz, 2H); **<sup>13</sup>C NMR** (150 MHz,  $CDCl_3$ )  $\delta$  170.0, 148.4, 138.6, 136.9, 136.5, 136.0, 134.9, 134.5, 132.3, 129.6, 129.3, 128.9, 128.5,

128.1, 128.0, 127.7, 127.5, 123.2, 122.5, 121.8, 121.7, 116.5, 43.3, 42.1, 32.1, 29.1, 26.1; **HRMS** (ESI-TOF) Calcd for  $C_{27}H_{28}N_3O_3S^+$  [M+H] 474.1851, found 474.1847.

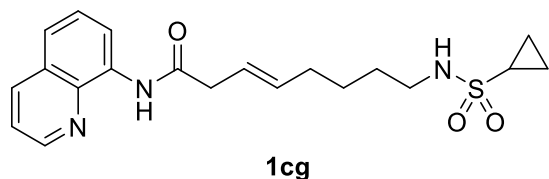

**(E)-8-(cyclopropanesulfonamido)-N-(quinolin-8-yl)oct-3-enamide (1cg):** The title compound was prepared from substrate **1c** (545 mg, 1.4 mmol), 4-cyclopropanesulfonyl chloride (200 mg, 1.0 mmol) according to General Procedure A. Purification using silica gel

column chromatography with 1:1 hexane:EtOAc as the eluent gave the product as a light-yellow solid (512 mg, 93% yield). **<sup>1</sup>H NMR** (600 MHz,  $CDCl_3$ )  $\delta$  10.00 (s, 1H), 8.80 (dd,  $J$  = 4.2, 1.7 Hz, 1H), 8.76 (dd,  $J$  = 7.4, 1.6 Hz, 1H), 8.16 (dd,  $J$  = 8.3, 1.7 Hz, 1H), 7.55–7.49 (m, 2H), 7.46 (dd,  $J$  = 8.3, 4.2 Hz, 1H), 5.81–5.73 (m, 2H), 4.23 (s, 1H), 3.30–3.26 (m, 2H), 3.18 (q,  $J$  = 6.8 Hz, 2H), 2.38 (tt,  $J$  = 8.0, 4.8 Hz, 1H), 2.20 (td,  $J$  = 7.2, 5.2 Hz, 2H), 1.66 (dtd,  $J$  = 8.8, 7.4, 7.0, 5.5 Hz, 2H), 1.60–1.54 (m, 2H), 1.17–1.13 (m, 2H), 0.98–0.94 (m, 2H); **<sup>13</sup>C NMR** (150 MHz,  $CDCl_3$ )  $\delta$  170.0, 148.4, 138.6, 136.5, 136.0, 134.5, 128.1, 127.5, 123.3, 121.8, 121.7, 116.5, 43.4, 42.2, 32.2, 30.1, 29.9, 26.2, 5.4; **HRMS** (ESI-TOF) Calcd for  $C_{20}H_{26}N_3O_3S^+$  [M+H] 388.1695, found 388.1693.

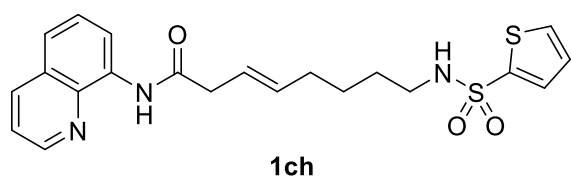

**(E)-N-(quinolin-8-yl)-8-(thiophene-2-sulfonamido)oct-3-enamide (1ch):** The title compound was prepared from substrate **1c** (500 mg, 1.3 mmol), thiophene-2-sulfonyl chloride (238 mg, 1.3 mmol) according to General Procedure A. Purification using silica

gel column chromatography with 2:1 hexane:EtOAc as the eluent gave the product as a light-yellow solid (465 mg, 83% yield). **<sup>1</sup>H NMR** (600 MHz,  $CDCl_3$ )  $\delta$  9.99 (s, 1H), 8.79 (dd,  $J$  = 4.3, 1.7 Hz, 1H), 8.76 (dd,  $J$  = 7.3, 1.6 Hz, 1H), 8.17 (dd,  $J$  = 8.3, 1.7 Hz, 1H), 7.61–7.53 (m, 2H), 7.57–7.47 (m, 2H), 7.46 (dd,  $J$  = 8.3, 4.2 Hz, 1H), 7.07 (dd,  $J$  = 5.0, 3.7 Hz, 1H), 5.79–5.67 (m, 2H), 4.56 (t,  $J$  = 6.1 Hz, 1H), 3.27 (d,  $J$  = 5.4 Hz, 2H), 3.07 (q,  $J$  = 6.7 Hz, 2H), 2.14 (td,  $J$  = 7.1, 5.2 Hz, 2H), 1.64–1.56 (m, 2H), 1.52 (tdd,  $J$  = 9.5, 6.8, 5.1 Hz, 2H); **<sup>13</sup>C NMR** (150 MHz,  $CDCl_3$ )  $\delta$  170.0, 148.4, 141.1, 138.6, 136.5, 136.0, 134.5, 132.2, 131.9, 128.1, 127.5, 127.5, 123.3, 121.8, 121.7, 116.5, 43.5, 42.2, 32.1, 29.0, 26.1; **HRMS** (ESI-TOF) Calcd for  $C_{21}H_{24}N_3O_3S_2^+$  [M+H] 430.1259, found 430.1262.

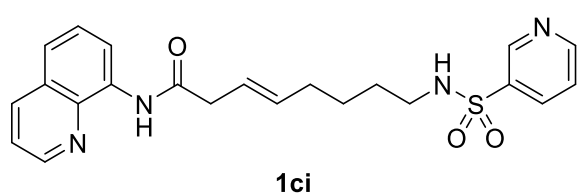

**(E)-8-(pyridine-3-sulfonamido)-N-(quinolin-8-yl)oct-3-enamide (1ci):** The title compound was prepared from substrate **1c** (547 mg, 1.4 mmol), pyridine-3-sulfonyl chloride (258 mg, 1.4 mmol) according to General Procedure A. Purification using silica

gel column chromatography with 2:1 hexane:EtOAc as the eluent gave the product as a light-yellow solid (499 mg, 82% yield). **<sup>1</sup>H NMR** (600 MHz,  $CDCl_3$ )  $\delta$  9.97 (s, 1H), 9.07 (dd,  $J$  = 2.4, 0.8 Hz, 1H), 8.79–8.76 (m, 2H), 8.74 (dd,  $J$  = 7.3, 1.7 Hz, 1H), 8.15 (dd,  $J$  = 8.3, 1.7 Hz, 1H), 8.12 (ddd,  $J$  = 8.0, 2.4, 1.7 Hz, 1H), 7.54–7.48 (m, 2H), 7.45 (dd,  $J$  = 8.2, 4.2 Hz, 1H), 7.42 (ddd,  $J$  = 8.0, 4.9, 0.9 Hz, 1H), 5.74–5.65 (m, 2H), 5.08 (t,  $J$  = 6.1 Hz, 1H), 3.27–3.23 (m, 2H), 3.02 (q,  $J$  = 6.7 Hz, 2H), 2.11 (td,  $J$  = 7.3, 5.1 Hz, 2H), 1.61–1.54 (m, 2H), 1.52–1.46 (m, 2H); **<sup>13</sup>C NMR** (150 MHz,  $CDCl_3$ )  $\delta$  170.1, 153.2, 148.4, 148.1, 138.6, 137.0, 136.5, 135.9, 134.8, 134.4, 128.1, 127.5, 123.8, 123.3, 121.8, 121.8, 116.5, 43.2, 42.1, 32.0, 29.1, 26.0; **HRMS** (ESI-TOF) Calcd for  $C_{22}H_{25}N_4O_3S^+$  [M+H] 425.1647, found 425.1648.

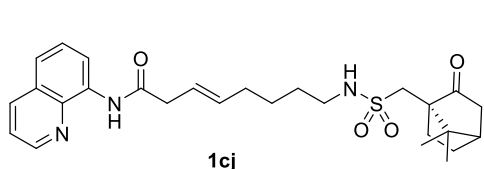

**(E)-8-((((1S)-7,7-dimethyl-2-oxobicyclo[2.2.1]heptan-1-yl)methyl)sulfonamido)-N-(quinolin-8-yl)oct-3-enamide (1cj):** The title compound was prepared from substrate **1c** (535 mg, 1.4 mmol), D(+)-10-Camphorsulfonyl chloride (350

mg, 1.4 mmol) according to General Procedure A. Purification using silica gel column chromatography with 1:1 hexane:EtOAc as the eluent gave the product as a light-yellow solid (440 mg, 63% yield). <sup>1</sup>H NMR (600 MHz, CDCl<sub>3</sub>) δ 10.04 (s, 1H), 8.81 (dd, *J* = 4.2, 1.7 Hz, 1H), 8.76 (dd, *J* = 7.4, 1.6 Hz, 1H), 8.15 (dd, *J* = 8.2, 1.7 Hz, 1H), 7.56–7.47 (m, 2H), 7.46 (dd, *J* = 8.2, 4.2 Hz, 1H), 5.85–5.73 (m, 2H), 5.16 (dd, *J* = 7.4, 5.0 Hz, 1H), 3.38 (d, *J* = 15.1 Hz, 1H), 3.28 (d, *J* = 6.6 Hz, 2H), 3.26–3.12 (m, 2H), 2.89 (d, *J* = 15.1 Hz, 1H), 2.38 (dt, *J* = 18.6, 4.0 Hz, 1H), 2.20 (m, 3H), 2.12 (t, *J* = 4.5 Hz, 1H), 2.02 (ddt, *J* = 15.8, 12.0, 4.2 Hz, 1H), 1.98–1.87 (m, 2H), 1.69 (dt, *J* = 14.3, 7.3 Hz, 2H), 1.65–1.58 (m, 2H), 1.43 (ddd, *J* = 12.9, 9.3, 4.0 Hz, 1H). <sup>13</sup>C NMR (150 MHz, CDCl<sub>3</sub>) δ 217.3, 170.0, 148.5, 138.7, 136.4, 136.4, 134.6, 128.1, 127.5, 123.1, 121.8, 121.6, 116.5, 59.4, 49.4, 49.0, 43.8, 43.1, 42.9, 42.3, 32.4, 29.7, 27.2, 26.9, 26.4, 20.1, 19.6; HRMS (ESI-TOF) Calcd for C<sub>27</sub>H<sub>36</sub>N<sub>3</sub>O<sub>4</sub>S<sup>+</sup> [M+H] 498.2427, found 498.2428.

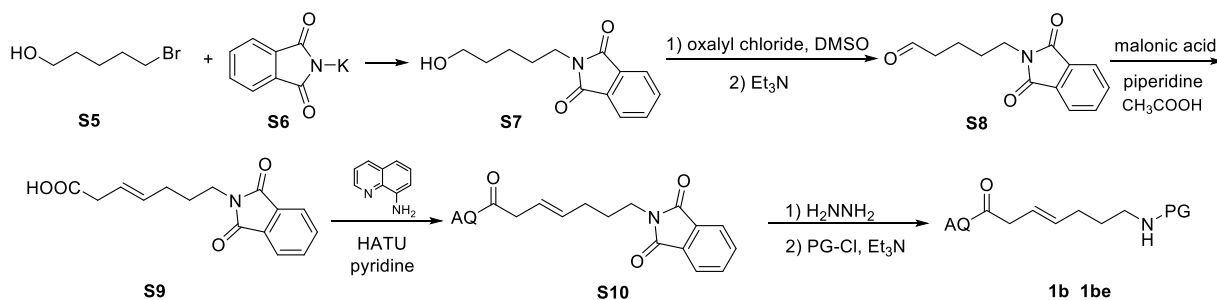

**Scheme S2:** Synthesis of substrates containing a nitrogen nucleophile [N-H] for 5-*exo-trig* cyclization (**1b-1be**).

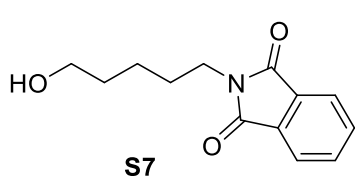

**2-(5-hydroxypentyl)isoindoline-1,3-dione (S7):** To a 250-mL round-bottom flask equipped with a magnetic stir bar were added commercially available 5-bromopentan-1-ol (5.0 g, 30 mmol), potassium phthalimide (8.3 g, 45 mmol), and DMF (50 mL). The mixture was heated to 70 °C while stirring for 2 h. After this time, the flask was allowed to cool to room

temperature, and the reaction mixture was diluted with H<sub>2</sub>O (50 mL) and extracted with CH<sub>2</sub>Cl<sub>2</sub> (3 × 30 mL). The combined organic layers were washed with brine, dried over anhydrous Na<sub>2</sub>SO<sub>4</sub>, and concentrated *in vacuo*. Purification using silica gel column chromatography with 3:1 to 1:1 hexanes:EtOAc as the eluent gave the product as a colorless oil (5.5 g, 79% yield). <sup>1</sup>H NMR (600 MHz, CDCl<sub>3</sub>) δ 7.86–7.79 (m, 2H), 7.73–7.67 (m, 2H), 3.72–3.66 (m, 2H), 3.63 (q, *J* = 6.2 Hz, 2H), 1.74–1.68 (m, 2H), 1.65–1.58 (m, 2H), 1.48 (t, *J* = 4.6 Hz, 1H), 1.46–1.38 (m, 2H); <sup>13</sup>C NMR (150 MHz, CDCl<sub>3</sub>) δ 168.6, 134.0, 132.3, 123.3, 62.8, 38.0, 32.3, 28.5, 23.2.

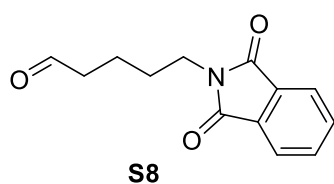

**5-(1,3-dioxisoindolin-2-yl)pentanal (S8):** The title compound was prepared from oxalyl chloride (3.3 mL, 38 mmol), DMSO (3.8 mL, 53 mmol), intermediate **S7** (5.9 g, 25 mmol) and Et<sub>3</sub>N (18 mL, 130 mmol) using a procedure similar to the one described above for the synthesis of intermediate **S3**. Purification using silica gel column chromatography with 3:1 to 2:1



hexanes:EtOAc as the eluent was performed quickly to afford the product as a colorless oil (5.1 g, 87% yield).  $^1\text{H NMR}$  (500 MHz,  $\text{CDCl}_3$ )  $\delta$  9.76 (s, 1H), 7.87–7.80 (m, 2H), 7.71 (dt,  $J = 6.9, 2.0$  Hz, 2H), 3.71 (t,  $J = 6.5$  Hz, 2H), 2.50 (t,  $J = 7.1$  Hz, 2H), 1.71 (dp,  $J = 22.3, 7.2$  Hz, 4H);  $^{13}\text{C NMR}$  (125 MHz,  $\text{CDCl}_3$ )  $\delta$  202.0, 168.5, 134.1, 132.2, 123.4, 43.3, 37.6, 28.1, 19.3.

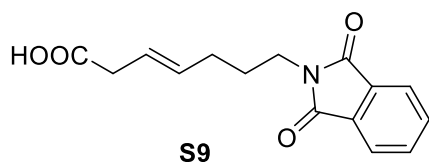

**(E)-7-(1,3-dioxoisindolin-2-yl)hept-3-enoic acid (S9):**

The title compound was prepared from intermediate **S8** (5.1 g, 22 mmol), malonic acid (2.5 g, 24 mmol), piperidine (10  $\mu\text{L}$ ), and acetic acid (6  $\mu\text{L}$ ) using a procedure similar to the one described above for the synthesis of the intermediate **S4**. Purification using silica gel column chromatography with 2:1 hexanes:EtOAc as the eluent gave the product as a yellow solid (3.6 g, 60% yield).  $^1\text{H NMR}$  (400 MHz,  $\text{DMSO}-d_6$ )  $\delta$  12.13 (s, 1H), 7.87–7.81 (m, 4H), 5.56–5.44 (m, 2H), 3.56 (t,  $J = 7.1$  Hz, 2H), 2.98–2.86 (m, 2H), 2.01 (dt,  $J = 9.1, 6.0$  Hz, 2H), 1.65 (p,  $J = 7.3$  Hz, 2H);  $^{13}\text{C NMR}$  (150 MHz,  $\text{DMSO}-d_6$ )  $\delta$  172.8, 167.9, 134.3, 132.1, 131.6, 123.5, 123.0, 37.5, 37.1, 29.3, 27.5.

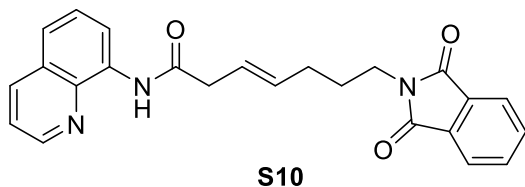

**(E)-7-(1,3-dioxoisindolin-2-yl)-N-(quinolin-8-yl)hept-3-enamide (S10):**

The title compound was prepared from intermediate **S9** (3.6 g, 13 mmol), 8-aminoquinoline (1.7 g, 12 mmol), pyridine (1.9 mL, 24 mmol), and HATU (6.7 g, 18 mmol) using a procedure similar to the one described above for the synthesis of the intermediate **1a**. Purification using silica gel column chromatography with 2:1 hexanes:EtOAc as the eluent gave the product as yellow solid (4.2 g, 88% yield).  $^1\text{H NMR}$  (600 MHz,  $\text{CDCl}_3$ )  $\delta$  10.02 (s, 1H), 8.77 (dd,  $J = 4.2, 1.7$  Hz, 1H), 8.75 (dd,  $J = 7.4, 1.5$  Hz, 1H), 8.13 (dd,  $J = 8.2, 1.7$  Hz, 1H), 7.84 (dd,  $J = 5.4, 3.0$  Hz, 2H), 7.71 (dd,  $J = 5.4, 3.0$  Hz, 2H), 7.55–7.48 (m, 2H), 7.42 (dd,  $J = 8.2, 4.2$  Hz, 1H), 5.85–5.79 (m, 2H), 3.78 (t,  $J = 7.2$  Hz, 2H), 3.28–3.24 (m, 2H), 2.24 (ddd,  $J = 8.9, 7.0, 5.2$  Hz, 2H), 1.95–1.87 (m, 2H);  $^{13}\text{C NMR}$  (150 MHz,  $\text{CDCl}_3$ )  $\delta$  169.9, 168.6, 148.4, 138.7, 136.4, 135.5, 134.6, 134.1, 132.3, 128.1, 127.5, 123.6, 123.4, 121.7, 121.6, 116.5, 42.2, 37.8, 30.2, 28.3.

**General Procedure B for preparation of 1b–1be:** To a 25-mL round-bottom flask equipped with a magnetic stir bar were added intermediate **S10** (1.0 equiv) and 50% hydrazine hydrate (2.3 equiv) in MeOH. The reaction mixture was stirred at ambient temperature for 3 h. The reaction mixture was concentrated *in vacuo*, and the crude product was carried forward to the next step without further purification. The residue was dissolved in DCM (8 mL), and the solution was cooled to 0  $^\circ\text{C}$  before treatment with  $\text{Et}_3\text{N}$  (2.0 equiv). Next, di-*tert*-butyl decarbonate (2 equiv), benzyl carbonochloridate (2 equiv), or  $\text{RSO}_2\text{Cl}$  (1.0 equiv) was added dropwise. The reaction was slowly warmed to room temperature and stirred for another 2 h. After removal of the solvent *in vacuo*, the residue was diluted with EtOAc, washed with sat.  $\text{NaHCO}_3$  (20 mL,  $\times 1$ ) and brine (20 mL,  $\times 1$ ), and concentrated *in vacuo*. Purification using silica gel column chromatography with hexanes:EtOAc as the eluent gave the product as light-yellow solid or oil.

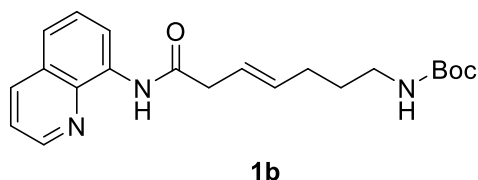

**tert-butyl (E)-7-(7-oxo-7-(quinolin-8-ylamino)hept-4-en-1-yl)carbamate (1b):**

S-9

prepared from intermediate **S10** (799 mg, 2 mmol), di-tert-butyl decarbonate (423 mg, 2 mmol) according to General Procedure B. Purification using silica gel column chromatography with 3:1 hexanes:EtOAc as the eluent gave the product as a light-yellow oil (236 mg, 32% yield).  $^1\text{H NMR}$  (400 MHz,  $\text{CDCl}_3$ )  $\delta$  10.02 (s, 1H), 8.82–8.73 (m, 2H), 8.15 (dd,  $J = 8.3, 1.7$  Hz, 1H), 7.58–7.48 (m, 2H), 7.44 (dd,  $J = 8.3, 4.2$  Hz, 1H), 5.88–5.71 (m, 2H), 4.64 (s, 1H), 3.31–3.25 (m, 2H), 3.26–3.16 (m, 2H), 2.26–2.16 (m, 2H), 1.75–1.66 (m, 2H), 1.44 (s, 9H);  $^{13}\text{C NMR}$  (150 MHz,  $\text{CDCl}_3$ )  $\delta$  170.0, 156.1, 148.4, 138.7, 136.5, 136.1, 134.5, 128.1, 127.5, 123.3, 121.7, 121.7, 116.5, 79.3, 42.2, 40.3, 30.1, 29.7, 28.6; **HRMS** (ESI-TOF) Calcd for  $\text{C}_{21}\text{H}_{28}\text{N}_3\text{O}_3^+$   $[\text{M}+\text{H}]$  370.2131, found 370.2126.

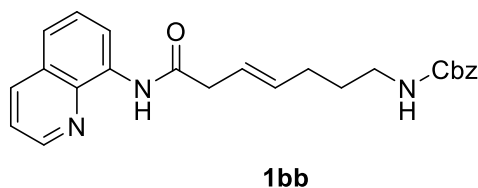

**benzyl (*E*)-7-(7-oxo-7-(quinolin-8-ylamino)hept-4-en-1-yl)carbamate (**1bb**):** The title compound was prepared from intermediate **S10** (799 mg, 2 mmol), benzyl carbonochloridate (341 mg, 2 mmol) and according to General Procedure B. Purification using silica gel column chromatography with 2:1

hexanes:EtOAc as the eluent gave the product as a yellow solid (468 mg, 58% yield).  $^1\text{H NMR}$  (600 MHz,  $\text{CDCl}_3$ )  $\delta$  9.99 (s, 1H), 8.77 (m, 2H), 8.15 (dd,  $J = 8.3, 1.7$  Hz, 1H), 7.55–7.49 (m, 2H), 7.42 (dd,  $J = 8.2, 4.2$  Hz, 1H), 7.36–7.29 (m, 5H), 5.79 (m, 2H), 5.10 (s, 2H), 4.90 (s, 1H), 3.29 (dd,  $J = 14.8, 6.3$  Hz, 4H), 2.22 (q,  $J = 6.7$  Hz, 2H), 1.74 (p,  $J = 7.2$  Hz, 2H);  $^{13}\text{C NMR}$  (150 MHz,  $\text{CDCl}_3$ )  $\delta$  169.9, 156.5, 148.4, 138.6, 136.8, 136.5, 135.9, 134.5, 128.7, 128.2, 128.2, 128.1, 127.5, 123.4, 121.7, 121.7, 116.5, 66.7, 42.2, 40.7, 30.0, 29.5; **HRMS** (ESI-TOF) Calcd for  $\text{C}_{24}\text{H}_{26}\text{N}_3\text{O}_3^+$   $[\text{M}+\text{H}]$  404.1974, found 404.1968.

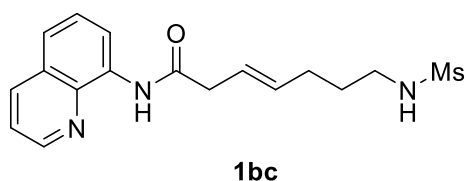

**(*E*)-7-(methylsulfonamido)-*N*-(quinolin-8-yl)hept-3-enamide (**1bc**):** The title compound was prepared from intermediate **S10** (500 mg, 1.2 mmol), methanesulfonyl chloride (137 mg, 1.2 mmol) according to General Procedure B. Purification using silica gel column chromatography with 1:1 hexanes:EtOAc as the eluent

gave the product as yellow solid (211 mg, 49% yield).  $^1\text{H NMR}$  (600 MHz,  $\text{CDCl}_3$ )  $\delta$  9.97 (s, 1H), 8.80 (dd,  $J = 4.2, 1.7$  Hz, 1H), 8.76 (dd,  $J = 7.3, 1.6$  Hz, 1H), 8.16 (dd,  $J = 8.2, 1.7$  Hz, 1H), 7.57–7.48 (m, 2H), 7.46 (dd,  $J = 8.3, 4.2$  Hz, 1H), 5.83–5.76 (m, 2H), 4.49 (s, 1H), 3.32–3.27 (m, 2H), 3.23 (q,  $J = 6.8$  Hz, 2H), 2.94 (s, 3H), 2.26 (q,  $J = 6.7$  Hz, 2H), 1.80 (q,  $J = 7.1$  Hz, 2H);  $^{13}\text{C NMR}$  (150 MHz,  $\text{CDCl}_3$ )  $\delta$  169.9, 148.4, 138.6, 136.6, 135.2, 134.5, 128.1, 127.6, 124.0, 121.8, 121.8, 116.6, 42.9, 42.0, 40.6, 30.0, 29.8; **HRMS** (ESI-TOF) Calcd for  $\text{C}_{17}\text{H}_{22}\text{N}_3\text{O}_3\text{S}^+$   $[\text{M}+\text{H}]$  348.1382, found 348.1381.

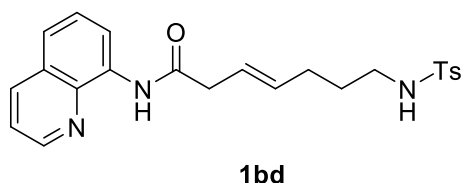

**(*E*)-7-((4-methylphenyl)sulfonamido)-*N*-(quinolin-8-yl)hept-3-enamide (**1bd**):** The title compound was prepared from intermediate **S10** (500 mg, 1.2 mmol), 4-methylbenzenesulfonyl chloride (229 mg, 1.2 mmol) according to General Procedure B. Purification using silica gel column chromatography with 1:1

hexanes:EtOAc as the eluent gave the product as a yellow solid (323 mg, 61% yield).  $^1\text{H NMR}$  (600 MHz,  $\text{CDCl}_3$ )  $\delta$  9.94 (s, 1H), 8.78–8.75 (m, 2H), 8.17 (dd,  $J = 8.2, 1.7$  Hz, 1H), 7.71 (d,  $J = 8.3$  Hz, 2H), 7.56–7.50 (m, 2H), 7.45 (dd,  $J = 8.3, 4.2$  Hz, 1H), 7.26–7.24 (m, 2H), 5.75–5.67 (m, 2H), 4.54 (t,  $J = 6.3$  Hz, 1H), 3.26–3.23 (m, 2H), 3.05 (q,  $J = 6.7$  Hz, 2H), 2.39 (s, 3H), 2.17 (q,  $J = 6.8$  Hz, 2H), 1.70 (q,  $J = 7.0$  Hz, 2H);  $^{13}\text{C NMR}$  (150 MHz,  $\text{CDCl}_3$ )  $\delta$  169.8, 148.4, 143.5, 138.6, 137.2, 136.5, 135.3, 134.5, 129.8, 128.1, 127.6, 127.2, 123.8,

121.8, 121.8, 116.6, 42.8, 42.0, 29.9, 29.3, 21.6; **HRMS** (ESI-TOF) Calcd for C<sub>23</sub>H<sub>26</sub>N<sub>3</sub>O<sub>3</sub>S<sup>+</sup> [M+H] 424.1695, found 424.1694.

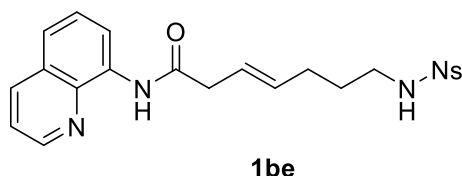

**(E)-7-((4-nitrophenyl)sulfonamido)-N-(quinolin-8-yl)hept-3-enamide (1be):** The title compound was prepared from intermediate **S10** (500 mg, 1.2 mmol), 4-nitrobenzenesulfonyl chloride (277 mg, 1.2 mmol) according to General Procedure B. Purification using silica gel column chromatography with 1:1

hexanes:EtOAc as the eluent gave the product as a yellow solid (302 mg, 53% yield). **<sup>1</sup>H NMR** (600 MHz, CDCl<sub>3</sub>) δ 9.91 (s, 1H), 8.74 (dd, *J* = 4.2, 1.7 Hz, 1H), 8.71 (dd, *J* = 6.7, 2.3 Hz, 1H), 8.24–8.21 (m, 2H), 8.14 (dd, *J* = 8.3, 1.7 Hz, 1H), 8.03–7.98 (m, 2H), 7.54–7.48 (m, 2H), 7.43 (dd, *J* = 8.3, 4.2 Hz, 1H), 5.74–5.66 (m, 3H), 3.26 (d, *J* = 5.5 Hz, 1H), 3.09 (q, *J* = 6.6 Hz, 2H), 2.18 (q, *J* = 6.8 Hz, 2H), 1.72 (p, *J* = 6.9 Hz, 2H); **<sup>13</sup>C NMR** (150 MHz, CDCl<sub>3</sub>) δ 170.2, 149.9, 148.4, 146.4, 138.5, 136.6, 135.2, 134.2, 128.3, 128.1, 127.4, 124.3, 123.9, 122.0, 121.8, 116.6, 43.0, 41.7, 30.1, 29.3; **HRMS** (ESI-TOF) Calcd for C<sub>22</sub>H<sub>23</sub>N<sub>4</sub>O<sub>5</sub>S<sup>+</sup> [M+H] 455.1389, found 455.1385.

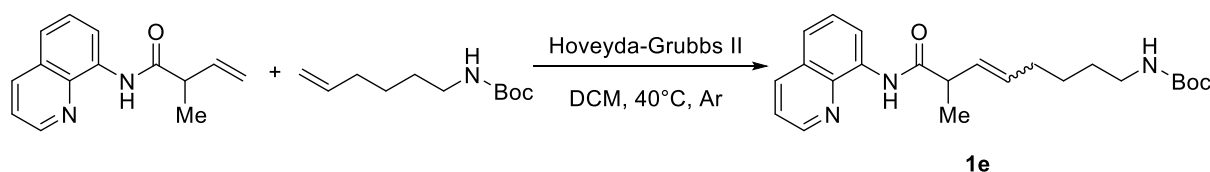

36%, *E/Z* = 10:1

**tert-butyl (7-methyl-8-oxo-8-(quinolin-8-ylamino)oct-5-en-1-yl)carbamate (1e):** To a 50-mL Schlenk flask equipped with a magnetic stir bar were added 2-methyl-*N*-(quinolin-8-yl)but-3-enamide (170 mg, 0.75 mmol), *tert*-butyl hex-5-en-1-ylcarbamate (200 mg, 1 mmol), Hoveyda–Grubbs 2<sup>nd</sup> generation catalyst (50 mg, 0.08 mmol), and DCM (4 mL). The reaction was stirred at 40 °C for 17 h. The dark brown solution was concentrated and purified by column chromatography (Hexanes:EtOAc = 10:1 to 5:1) to afford product as a yellow oil (106 mg, 36%, *E/Z* = 10:1). The ensuing analytical data correspond to the major product, the *E*-isomer. **<sup>1</sup>H NMR** (600 MHz, CDCl<sub>3</sub>) δ 10.08 (s, 1H), 8.81–8.75 (m, 2H), 8.15 (dd, *J* = 8.3, 1.7 Hz, 1H), 7.53 (t, *J* = 7.9 Hz, 1H), 7.49 (dd, *J* = 8.2, 1.5 Hz, 1H), 7.46–7.43 (m, 1H), 5.84–5.76 (m, 1H), 5.73–5.66 (m, 1H), 4.48 (s, 1H), 3.30 (p, *J* = 7.2 Hz, 1H), 3.13 (d, *J* = 7.6 Hz, 2H), 2.19–2.12 (m, 2H), 1.56–1.48 (m, 4H), 1.42 (s, 9H), 1.41 (d, *J* = 7.1 Hz, 3H). **<sup>13</sup>C NMR** (150 MHz, CDCl<sub>3</sub>) δ 173.31, 148.29, 138.76, 136.44, 134.74, 133.66, 132.91, 130.26, 128.09, 127.57, 121.72, 121.52, 116.39, 46.13, 40.61, 32.39, 29.73, 28.56, 27.46, 26.58, 17.45. **HRMS** (ESI-TOF) Calcd for C<sub>23</sub>H<sub>32</sub>N<sub>3</sub>O<sub>3</sub><sup>+</sup> [M+H]<sup>+</sup> calc: 398.2444, found 398.2445.

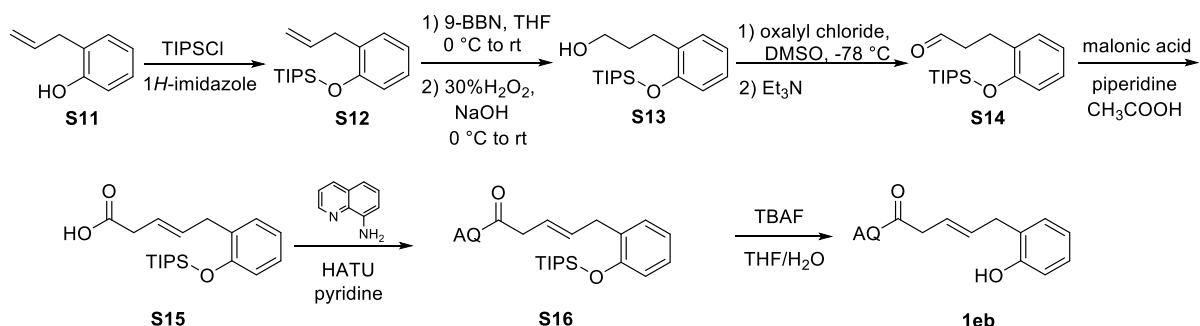

**Scheme S3:** Synthesis of substrates containing an oxygen nucleophile [O-H] for 5-exo-trig cyclization(**1eb**).

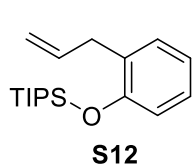

**(2-allylphenoxy)triisopropylsilane (S12):**<sup>5</sup> To a solution of 2-allylphenol (2.7 g, 20 mmol) in anhydrous DMF (15 mL) was added imidazole (4.1 g, 60 mmol) in one portion under N<sub>2</sub>. After the reaction mixture was stirred for 15 min, TIPSCl (7.7 g, 40 mmol) was added. The reaction mixture was then stirred at room temperature for 10 h (at which point it had reached completion, as monitored by TLC). The reaction mixture was slowly poured into water (100 mL) and extracted with CH<sub>2</sub>Cl<sub>2</sub> (3 × 50 mL). The combined organic layers were washed with water (3 × 50 mL) and the solvent was removed under reduced pressure. Purification using silica gel column chromatography with hexanes as the eluent gave the product as a colorless oil (5.7 g, 97%). <sup>1</sup>H NMR (600 MHz, CDCl<sub>3</sub>) δ 7.13 (dd, *J* = 7.5, 1.8 Hz, 1H), 7.07 (td, *J* = 7.7, 1.9 Hz, 1H), 6.87 (td, *J* = 7.4, 1.2 Hz, 1H), 6.80 (dd, *J* = 8.1, 1.2 Hz, 1H), 6.00 (ddt, *J* = 16.9, 10.2, 6.6 Hz, 1H), 5.08–5.03 (m, 2H), 3.42 (dd, *J* = 6.6, 1.6 Hz, 2H), 1.36–1.28 (m, 3H), 1.12 (d, *J* = 7.5 Hz, 18H); <sup>13</sup>C NMR (150 MHz, CDCl<sub>3</sub>) δ 153.9, 137.3, 130.4, 130.2, 127.1, 120.8, 118.1, 115.5, 34.7, 18.2, 13.2.

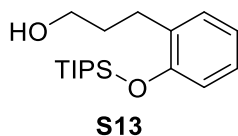

**3-(2-((triisopropylsilyloxy)phenyl)propan-1-ol (S13):**<sup>6</sup> To a stirring solution of **S12** (3.0 g, 10 mmol) in anhydrous THF (50 mL) at 0 °C was added 9-BBN (0.5 M solution in THF, 44.0 mL, 22 mmol) dropwise under a nitrogen atmosphere. The mixture was then stirred at room temperature for 6 h. The reaction was carefully terminated by the addition of H<sub>2</sub>O (2 mL) at 0 °C. Next, 1 M NaOH solution (27 mL) and 30% H<sub>2</sub>O<sub>2</sub> (18 mL) were added sequentially, and the reaction mixture was stirred for an additional 12 h at rt. The reaction mixture was then partitioned between brine (50 mL) and EtOAc (50 mL). The aqueous phase was extracted with EtOAc (40 mL). The combined organic extracts were washed with brine, dried over anhydrous Na<sub>2</sub>SO<sub>4</sub>, filtered, and concentrated under reduced pressure. Purification using silica gel column chromatography with 5:1 hexanes:EtOAc as the eluent gave the product as a colorless oil (2.7 g, 84%). <sup>1</sup>H NMR (600 MHz, CDCl<sub>3</sub>) δ 7.13 (dd, *J* = 7.4, 1.8 Hz, 1H), 7.05 (ddd, *J* = 8.0, 7.4, 1.8 Hz, 1H), 6.87 (td, *J* = 7.4, 1.2 Hz, 1H), 6.79 (dd, *J* = 8.1, 1.2 Hz, 1H), 3.65 (q, *J* = 6.1 Hz, 2H), 2.73 (dd, *J* = 8.3, 6.9 Hz, 2H), 1.89–1.85 (m, 2H), 1.45 (s, 1H), 1.35–1.29 (m, 3H), 1.12 (d, *J* = 7.5 Hz, 18H); <sup>13</sup>C NMR (150 MHz, CDCl<sub>3</sub>) δ 154.0, 131.9, 130.4, 127.0, 121.0, 118.2, 62.6, 33.2, 26.8, 18.2, 13.3.

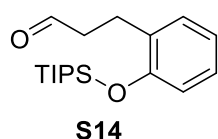

**3-(2-((triisopropylsilyloxy)phenyl)propanal (S14):** The title compound was prepared from oxalyl chloride (1.3 mL, 15.3 mmol), DMSO (1.5 mL, 21.4 mmol), intermediate **S13** (3.1 g, 10.2 mmol), and Et<sub>3</sub>N (7.1 mL, 51 mmol) using a procedure similar to the one described above for the synthesis of intermediate **S3**. Purification using silica gel column chromatography with 20:1 hexanes:EtOAc as the eluent was performed quickly to afford the

product as a colorless oil (2.7 g, 86% yield).  $^1\text{H NMR}$  (600 MHz,  $\text{CDCl}_3$ )  $\delta$  9.82 (t,  $J = 1.6$  Hz, 1H), 7.13 (dd,  $J = 7.5, 1.8$  Hz, 1H), 7.08 (td,  $J = 7.7, 1.8$  Hz, 1H), 6.86 (td,  $J = 7.4, 1.2$  Hz, 1H), 6.80 (dd,  $J = 8.2, 1.2$  Hz, 1H), 2.96 (t,  $J = 7.6$  Hz, 2H), 2.75 (ddd,  $J = 8.8, 7.1, 1.6$  Hz, 2H), 1.35–1.29 (m, 3H), 1.11 (d,  $J = 7.4$  Hz, 18H);  $^{13}\text{C NMR}$  (150 MHz,  $\text{CDCl}_3$ )  $\delta$  202.4, 154.1, 130.5, 130.3, 127.5, 121.0, 118.2, 44.2, 23.9, 18.2, 13.2.

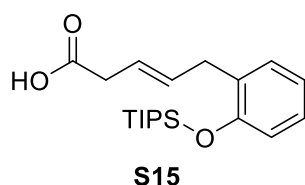

**(E)-5-(2-((triisopropylsilyloxy)phenyl)pent-3-enoic acid (S15):**

The title compound was prepared from intermediate **S14** (2.7 g, 8.8 mmol), malonic acid (1.0 g, 9.7 mmol), piperidine (10  $\mu\text{L}$ ) and acetic acid (6  $\mu\text{L}$ ) in the same manner as described above for the synthesis of the intermediate **S4**. Purification using silica gel column chromatography with 3:1 hexanes:EtOAc as the eluent gave the product as yellow solid (2.2 g, 72% yield).  $^1\text{H NMR}$  (600 MHz,  $\text{DMSO}-d_6$ )  $\delta$  12.14 (s, 1H), 7.13–7.08 (m, 2H), 6.86 (td,  $J = 7.4, 1.2$  Hz, 1H), 6.79 (dd,  $J = 8.1, 1.1$  Hz, 1H), 5.66 (dt,  $J = 14.9, 6.7, 1.4$  Hz, 1H), 5.51 (dt,  $J = 15.4, 7.0, 1.5$  Hz, 1H), 3.32–3.30 (m, 2H), 2.96 (dq,  $J = 6.9, 1.2$  Hz, 2H), 1.34–1.27 (m, 3H), 1.07 (d,  $J = 7.5$  Hz, 18H);  $^{13}\text{C NMR}$  (150 MHz,  $\text{DMSO}-d_6$ )  $\delta$  172.7, 153.1, 131.2, 130.0, 129.9, 127.2, 123.8, 120.9, 117.7, 37.5, 32.7, 17.9, 12.4.

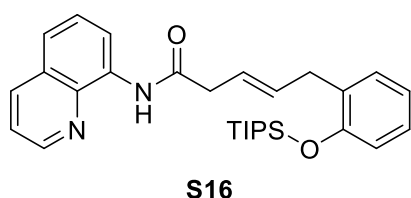

**(E)-N-(quinolin-8-yl)-5-(2-((triisopropylsilyloxy)phenyl)pent-3-enamide (S16):**

The title compound was prepared from intermediate **S15** (2.1 g, 6.0 mmol), 8-aminoquinoline (782 mg, 5.4 mmol), pyridine (880  $\mu\text{L}$ , 11 mmol), and HATU (2.5 g, 6.5 mmol) using a procedure similar to the one described above for the synthesis of the compound **1c**. Purification using silica gel column chromatography with 2:1 hexanes:EtOAc as the eluent gave the product as light-yellow solid (2.2 g, 76% yield).  $^1\text{H NMR}$  (600 MHz,  $\text{CDCl}_3$ )  $\delta$  10.05 (s, 1H), 8.77 (dd,  $J = 7.5, 1.5$  Hz, 1H), 8.75 (dd,  $J = 4.2, 1.7$  Hz, 1H), 8.15 (dd,  $J = 8.2, 1.7$  Hz, 1H), 7.56–7.48 (m, 2H), 7.44 (dd,  $J = 8.3, 4.2$  Hz, 1H), 7.28 (dd,  $J = 7.6, 1.7$  Hz, 1H), 7.08 (td,  $J = 7.7, 1.8$  Hz, 1H), 6.87 (td,  $J = 7.5, 1.1$  Hz, 1H), 6.81 (dd,  $J = 8.1, 1.1$  Hz, 1H), 6.00 (dt,  $J = 14.6, 6.6, 1.3$  Hz, 1H), 5.86–5.78 (m, 1H), 3.54 (d,  $J = 6.7$  Hz, 2H), 3.31 (dd,  $J = 7.2, 1.2$  Hz, 2H), 1.31 (m, 3H), 1.10 (d,  $J = 7.5$  Hz, 18H);  $^{13}\text{C NMR}$  (150 MHz,  $\text{CDCl}_3$ )  $\delta$  170.0, 153.9, 148.3, 138.7, 136.4, 135.1, 134.6, 130.3, 130.3, 128.1, 127.5, 127.2, 123.6, 121.7, 121.6, 120.9, 118.1, 116.5, 42.3, 33.5, 18.2, 13.2.

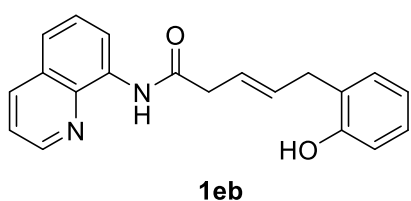

**(E)-5-(2-hydroxyphenyl)-N-(quinolin-8-yl)pent-3-enamide (1eb):**

To a stirring solution of **S16** (500 mg, 1.1 mmol) in THF/ $\text{H}_2\text{O}$  (1:1, 5 mL) was added TBAF (412 mg in 1:1 THF/ $\text{H}_2\text{O}$  mixed solvent, 5 mL) under a nitrogen atmosphere at 0  $^\circ\text{C}$ . The mixture was then stirred at room temperature for 24 h, at which point the reaction has reached completion (as monitored by TLC). The reaction mixture was then partitioned between brine (20 mL) and EtOAc (20 mL). The aqueous phase was extracted with another portion of EtOAc (20 mL). The combined organic extracts were washed with brine, dried over anhydrous  $\text{Na}_2\text{SO}_4$ , filtered, and concentrated under reduced pressure. Purification using silica gel column chromatography with 4:1 hexanes:EtOAc as the eluent gave the product as a yellow solid (264 mg, 79% yield).  $^1\text{H NMR}$  (600 MHz,  $\text{CDCl}_3$ )  $\delta$  9.83 (s, 1H), 8.86 (dd,  $J = 4.2, 1.7$  Hz, 1H), 8.80 (dd,  $J = 7.1, 1.9$  Hz, 1H), 8.20 (dd,  $J = 8.3, 1.7$  Hz, 1H), 7.58–7.50 (m, 2H), 7.50 (dd,  $J = 8.3, 4.3$  Hz, 1H), 7.20 (dd,  $J = 7.4, 1.7$  Hz, 1H), 7.13 (td,  $J = 7.7, 1.7$  Hz, 1H), 6.90 (td,  $J = 7.4, 1.2$  Hz, 1H), 6.82 (dd,  $J = 8.0, 1.2$  Hz, 1H), 5.99 (dt,  $J = 15.1, 6.2, 1.3$

Hz, 1H), 5.84–5.78 (m, 1H), 3.52 (d,  $J = 6.5$  Hz, 2H), 3.33 (dq,  $J = 7.2, 1.1$  Hz, 2H);  $^{13}\text{C}$  NMR (150 MHz,  $\text{CDCl}_3$ )  $\delta$  169.4, 153.7, 147.8, 138.0, 136.4, 134.1, 133.8, 130.1, 127.7, 127.4, 127.0, 125.7, 123.1, 121.4, 121.1, 120.6, 116.9, 115.9, 41.3, 33.7; HRMS (ESI-TOF) Calcd for  $\text{C}_{20}\text{H}_{19}\text{N}_2\text{O}_2^+$   $[\text{M}+\text{H}]$  319.1447, found 319.1449.

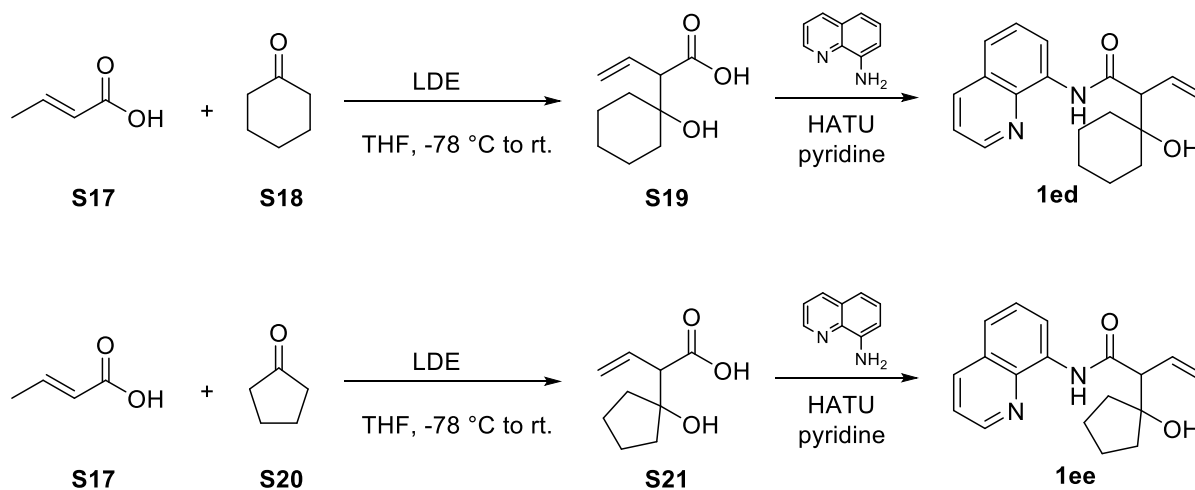

**Scheme S4:** Synthesis of the substrates containing an oxygen nucleophile [O-H] for 5-endo-trig cyclization (**1ec**, **1ed**).

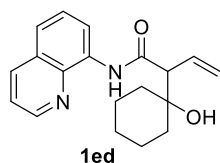

**2-(1-hydroxycyclohexyl)-N-(quinolin-8-yl)but-3-enamide (1ed):** Key intermediate **S19** was prepared from 2-isopropylbut-3-enoic acid (1.7 g, 20 mmol), cyclohexanone (2.0 g, 20 mmol), *n*-BuLi (17.6 mL, 44 mmol, 2.5 M in hexanes), and diethylamine (4.6 mL, 44 mmol) according to a literature procedure.<sup>4</sup> Purification using silica gel column chromatography with 10:1 hexanes:EtOAc as the eluent gave the product as a yellow oil (3.2 g, 86% yield). Next, title compound **1ec** was prepared from acid **S19** (3.1 g, 17 mmol), 8-aminoquinoline (2.2 g, 15 mmol), pyridine (2.7 mL, 34 mmol), and HATU (7.7 g, 20 mmol) using a procedure similar to the one described above for the synthesis of the compound **1c**. The crude product was purified by column chromatography with 7:1 hexanes:EtOAc as the eluent to afford the product as light-yellow solid (2.2 g, 43% yield).  $^1\text{H}$  NMR (600 MHz,  $\text{CDCl}_3$ )  $\delta$  10.13 (s, 1H), 8.82 (dd,  $J = 4.2, 1.7$  Hz, 1H), 8.75 (dd,  $J = 5.3, 3.7$  Hz, 1H), 8.17 (dd,  $J = 8.2, 1.7$  Hz, 1H), 7.57–7.51 (m, 2H), 7.46 (dd,  $J = 8.2, 4.2$  Hz, 1H), 6.22 (ddd,  $J = 17.1, 10.2, 9.6$  Hz, 1H), 5.43–5.34 (m, 2H), 4.20 (d,  $J = 0.9$  Hz, 1H), 3.19 (d,  $J = 9.5$  Hz, 1H), 1.79–1.63 (m, 4H), 1.57 (m, 2H), 1.51 (dq,  $J = 13.5, 4.3$  Hz, 2H), 1.41–1.33 (m, 1H), 1.31–1.23 (m, 1H);  $^{13}\text{C}$  NMR (150 MHz,  $\text{CDCl}_3$ )  $\delta$  172.7, 148.5, 138.7, 136.5, 134.2, 133.6, 128.1, 127.4, 122.2, 121.8, 120.2, 117.1, 72.6, 61.9, 37.2, 35.1, 25.9, 22.2, 21.7; HRMS (ESI-TOF) Calcd for  $\text{C}_{19}\text{H}_{23}\text{N}_2\text{O}_2^+$   $[\text{M}+\text{H}]$  311.1760, found 311.1760.

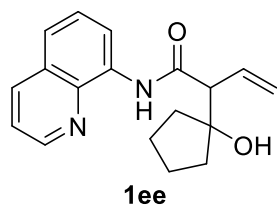

**2-(1-hydroxycyclopentyl)-N-(quinolin-8-yl)but-3-enamide (1ee):** Key intermediate **S21** was prepared from 2-isopropylbut-3-enoic acid (1.7 g, 20 mmol), cyclopentanone (2.0 g, 20 mmol), *n*-BuLi (17.6 mL, 44 mmol, 2.5 M in hexanes), and diethylamine (4.6 mL, 44 mmol) according to a literature procedure.<sup>4</sup> Next, title compound **1ed** was prepared from acid **S21** (2.6 g, 15 mmol), 8-aminoquinoline (2.0 g, 13.5 mmol), pyridine (2.4 mL, 30 mmol), and HATU (6.9 g, 18 mmol) using a procedure similar to the one described above for

synthesis of the compound **1ec**. The crude product was purified by column chromatography with 7:1 hexanes:EtOAc as the eluent to afford the product as light-yellow oil (1.5 g, 34% yield).  $^1\text{H NMR}$  (600 MHz,  $\text{CDCl}_3$ )  $\delta$  10.13 (s, 1H), 8.82 (dd,  $J = 4.2, 1.7$  Hz, 1H), 8.75 (dd,  $J = 6.0, 3.0$  Hz, 1H), 8.17 (dd,  $J = 8.3, 1.7$  Hz, 1H), 7.56–7.53 (m, 2H), 7.46 (dd,  $J = 8.3, 4.2$  Hz, 1H), 6.24 (ddd,  $J = 17.1, 10.2, 9.2$  Hz, 1H), 5.43 (ddd,  $J = 17.2, 1.5, 0.8$  Hz, 1H), 5.38 (dd,  $J = 10.2, 1.5$  Hz, 1H), 4.22 (s, 1H), 3.24 (d,  $J = 9.1$  Hz, 1H), 1.90–1.85 (m, 2H), 1.80–1.72 (m, 2H), 1.66–1.61 (m, 4H);  $^{13}\text{C NMR}$  (150 MHz,  $\text{CDCl}_3$ )  $\delta$  172.8, 148.6, 138.7, 136.5, 134.3, 134.2, 128.1, 127.4, 122.2, 121.8, 119.9, 117.0, 82.9, 61.4, 39.8, 38.0, 24.2, 23.9; **HRMS** (ESI-TOF) Calcd for  $\text{C}_{18}\text{H}_{21}\text{N}_2\text{O}_2^+$   $[\text{M}+\text{H}]$  297.1603, found 297.1604.

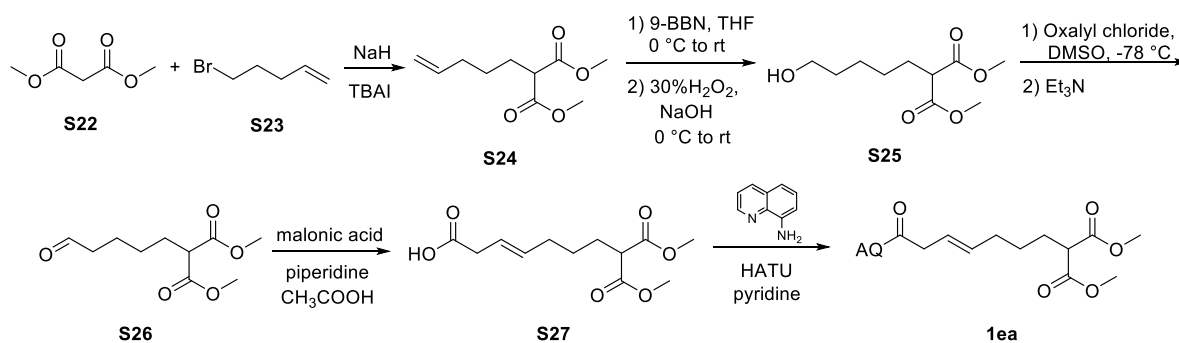

**Scheme S5:** Synthesis of the substrates containing a carbon nucleophile [C-H] for 5-exo-trig cyclization (**1ea**).

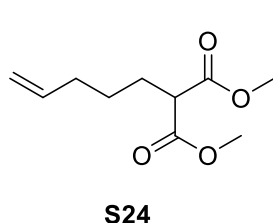

**dimethyl 2-(pent-4-en-1-yl)malonate (S24):**  $^7$ Anhydrous NaH (720 mg, 18 mmol, 1.2 equiv) and anhydrous THF (60 mL) were introduced into a two-neck flask, and the suspension was cooled to 0 °C. Dimethyl malonate (2.7 mL, 16.8 mmol, 1.13 equiv) was then added dropwise over 5 min. The ice bath was removed, and the solution was stirred at room temperature for an additional 30 min. Tetrabutylammonium iodide (1.7 g, 4.5 mmol, 0.3 equiv) was added,

followed by 5-bromopent-1-ene (1.7 mL, 15 mmol, 1.0 equiv), and the mixture was purged with  $\text{N}_2$  and heated at reflux (80 °C) overnight. The solution was then allowed to cool to room temperature and quenched by addition of aq. sat.  $\text{NH}_4\text{Cl}$  solution. The aqueous layer was extracted with diethyl ether ( $3 \times 20$  mL), and the combined organic layers were washed with brine (20 mL), dried over  $\text{MgSO}_4$ , concentrated under reduced pressure. The crude product was purified by silica gel column chromatography (20:1 hexane:EtOAc) to afford **S22** as a colorless oil (1.8 g, 6.82 mmol, 59%).  $^1\text{H NMR}$  (600 MHz,  $\text{CDCl}_3$ )  $\delta$  5.77 (ddt,  $J = 16.9, 10.2, 6.7$  Hz, 1H), 5.01 (dq,  $J = 17.1, 1.7$  Hz, 1H), 4.96 (ddt,  $J = 10.2, 2.1, 1.2$  Hz, 1H), 3.73 (s, 6H), 3.36 (t,  $J = 7.6$  Hz, 1H), 2.11–2.04 (m, 2H), 1.95–1.88 (m, 2H), 1.45–1.37 (m, 2H);  $^{13}\text{C NMR}$  (150 MHz,  $\text{CDCl}_3$ )  $\delta$  170.0, 138.0, 115.2, 52.6, 51.7, 33.4, 28.4, 26.7.

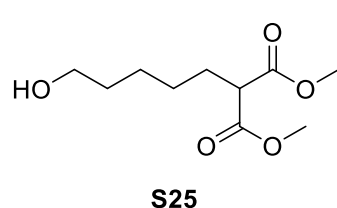

**dimethyl 2-(5-hydroxypentyl)malonate (S25):** The title compound was prepared from intermediate **S24** (1.8 g, 8.9 mmol), 9-BBN (0.5 M solution in THF, 37.4 mL, 18.7 mmol), 1 M NaOH solution (30 mL), and 30%  $\text{H}_2\text{O}_2$  (24 mL) using a procedure similar to the one described above for the synthesis of compound **S13**. Purification using silica gel column chromatography with 2:1 hexanes:EtOAc as the eluent gave the product as a colorless oil

(1.38 g, 71%).  $^1\text{H NMR}$  (500 MHz,  $\text{CDCl}_3$ )  $\delta$  3.74 (s, 6H), 3.63 (t,  $J = 6.6$  Hz, 2H), 3.37 (t,  $J$

= 7.5 Hz, 1H), 1.94–1.89 (m, 2H), 1.56 (m, 2H), 1.42–1.33 (m, 4H), 1.25 (s, 1H); <sup>13</sup>C NMR (150 MHz, CDCl<sub>3</sub>) δ 170.0, 62.9, 52.6, 51.8, 32.5, 28.9, 27.2, 25.5.

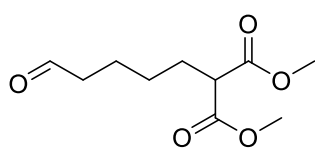

**S26**

**dimethyl 2-(5-oxopentyl)malonate (S26):** The title compound was prepared from oxalyl chloride (0.31 mL, 3.6 mmol), DMSO (0.36 mL, 5.0 mmol), intermediate **S25** (522 mg, 2.4 mmol), and Et<sub>3</sub>N (1.7 mL, 12.0 mmol) using a procedure similar to the one described above for the synthesis of intermediate **S3**. Purification

using silica gel column chromatography with 3:1 hexanes:EtOAc as the eluent was performed quickly to afford the product as a colorless oil (410 mg, 79% yield). <sup>1</sup>H NMR (500 MHz, CDCl<sub>3</sub>) δ 3.74 (s, 6H), 3.63 (t, *J* = 6.6 Hz, 2H), 3.37 (t, *J* = 7.5 Hz, 1H), 1.94–1.89 (m, 2H), 1.56 (m, 2H), 1.42–1.33 (m, 4H), 1.25 (s, 1H); <sup>13</sup>C NMR (150 MHz, CDCl<sub>3</sub>) δ 170.0, 62.9, 52.6, 51.8, 32.5, 28.9, 27.2, 25.5.

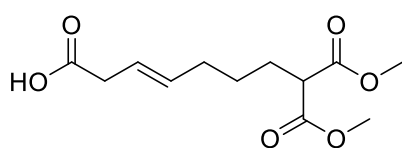

**S27**

**(E)-9-methoxy-8-(methoxycarbonyl)-9-oxonon-3-enoic acid (S27):**

The title compound was prepared from intermediate **S26** (410 mg, 1.9 mmol), malonic acid (217 mg, 2.1 mmol), piperidine (10 μL) and acetic acid (6 μL) using a procedure similar to the one described above for the synthesis of intermediate **S4**. Purification using silica gel column chromatography with 1:1 hexanes:EtOAc as the

eluent gave the product as a colorless oil (370 mg, 75% yield). <sup>1</sup>H NMR (600 MHz, DMSO-*d*<sub>6</sub>) δ 12.12 (s, 1H), 5.49–5.45 (m, 2H), 3.65 (s, 9H), 3.52 (t, *J* = 7.5 Hz, 1H), 2.96–2.92 (m, 2H), 2.02–1.96 (m, 2H), 1.75 (dd, *J* = 8.0, 2.5 Hz, 2H), 1.33–1.27 (m, 2H); <sup>13</sup>C NMR (150 MHz, DMSO-*d*<sub>6</sub>) δ 172.8, 169.5, 132.5, 123.3, 52.3, 50.7, 37.5, 31.4, 27.8, 26.2.

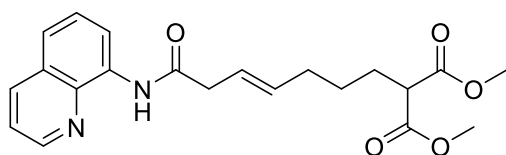

**1ea**

**dimethyl (E)-2-(7-oxo-7-(quinolin-8-ylamino)hept-4-en-1-yl)malonate (1ea):** The title compound was prepared from intermediate **S27** (350 mg, 1.4 mmol), 8-aminoquinoline (176 mg, 1.2 mmol), pyridine (220 μL, 2.7 mmol), and HATU (620 mg, 1.6 mmol) using a procedure similar to the one described above for the synthesis

of compound **1c**. Purification using silica gel column chromatography with 4:1 hexanes:EtOAc as the eluent gave the product as light-yellow oil (296 mg, 63% yield). <sup>1</sup>H NMR (600 MHz, CDCl<sub>3</sub>) δ 10.02 (s, 1H), 8.79 (dd, *J* = 4.2, 1.7 Hz, 1H), 8.76 (dd, *J* = 7.4, 1.5 Hz, 1H), 8.15 (dd, *J* = 8.3, 1.7 Hz, 1H), 7.56–7.47 (m, 2H), 7.45 (dd, *J* = 8.2, 4.2 Hz, 1H), 5.84–5.72 (m, 2H), 3.71 (s, 6H), 3.39 (t, *J* = 7.5 Hz, 1H), 3.27 (d, *J* = 6.0 Hz, 1H), 2.23–2.17 (m, 2H), 2.02–1.94 (m, 2H), 1.57–1.49 (m, 2H); <sup>13</sup>C NMR (150 MHz, CDCl<sub>3</sub>) δ 170.0, 169.9, 148.4, 138.7, 136.4, 135.9, 134.6, 128.1, 127.5, 123.3, 121.7, 121.6, 116.5, 52.6, 51.7, 42.2, 32.4, 28.6, 27.1; HRMS (ESI-TOF) Calcd for C<sub>21</sub>H<sub>25</sub>N<sub>2</sub>O<sub>5</sub><sup>+</sup> [M+H] 385.1763, found 385.1758.

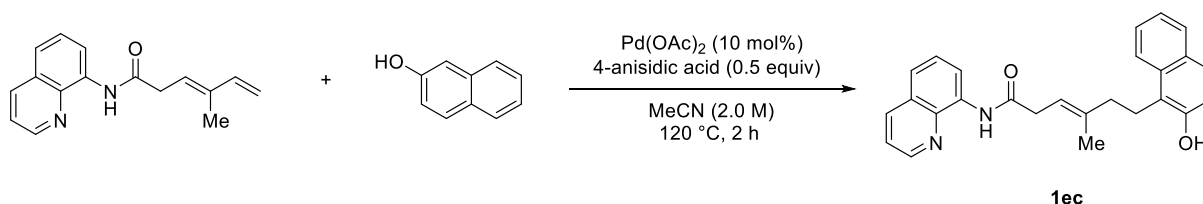

**1ec**



**(E)-6-(3-hydroxynaphthalen-2-yl)-4-methyl-N-(quinolin-8-yl)hex-3-enamide (1ec):** To a 1 dram (4 mL) vial equipped with a magnetic stir bar were added Pd(OAc)<sub>2</sub> (19.8 mg, 0.09 mmol), diene (227 mg, 0.9 mmol), *p*-methoxybenzoic acid (68.4 mg, 0.45 mmol), 2-naphthol (194 mg, 1.35 mmol), and MeCN (0.45 mL). The vial was sealed with an unpunctured TFE septum-covered screw cap and placed in a heating block that was pre-heated to 80 °C for 2 h. The reaction vial was cooled to room temperature, and the dark brown solution was directly purified by preparative TLC with 2:1 hexanes:EtOAc as the eluent to afford the desired product as a yellow solid (7.4 mg, 2% yield). Also observed in the crude reaction mixture were the unreacted starting material and the cyclized product **3c**.<sup>[16]</sup> **<sup>1</sup>H NMR** (600 MHz, CDCl<sub>3</sub>) δ 9.98 (s, 1H), 9.18–8.70 (m, 2H), 8.20 (dd, *J* = 8.3, 1.7 Hz, 1H), 7.95 (dd, *J* = 8.6, 1.0 Hz, 1H), 7.82 (s, 1H), 7.80–7.72 (m, 1H), 7.62 (d, *J* = 8.8 Hz, 1H), 7.58–7.52 (m, 2H), 7.51–7.45 (m, 2H), 7.31 (ddd, *J* = 8.0, 6.8, 1.1 Hz, 1H), 7.14 (d, *J* = 8.8 Hz, 1H), 5.56 (td, *J* = 8.0, 1.6 Hz, 1H), 3.33 (dd, *J* = 8.1, 1.0 Hz, 2H), 3.32–3.26 (m, 2H), 2.58–2.46 (m, 2H), 1.92 (q, *J* = 0.9 Hz, 3H). **<sup>13</sup>C NMR** (150 MHz, CDCl<sub>3</sub>) δ 171.17, 152.16, 148.42, 142.42, 138.55, 136.84, 134.34, 133.14, 129.37, 128.82, 128.20, 128.01, 127.70, 126.43, 122.86, 122.54, 122.15, 121.80, 119.00, 118.93, 117.41, 117.23, 38.16, 32.53, 24.92, 24.20. **HRMS (ESI-TOF)** Calcd for C<sub>26</sub>H<sub>25</sub>N<sub>2</sub>O<sub>2</sub><sup>+</sup> [M+H]<sup>+</sup> 397.1916, found 397.1913.

## General Procedure C for Alkene Intramolecular Hydrofunctionalization

To an 8-mL reaction tube equipped with a Teflon-coated magnetic stir bar were added the alkene substrate (0.1 mmol), 1-adamantanecarboxylic acid (0.1 mmol), Pd(OAc)<sub>2</sub> (10 mol%), Acetonitrile (0.1 mL). The vial was sealed with an unpunctured TFE septum-covered screw cap and placed in a heating block that was pre-heated to 100 °C. After the reaction reached completion (as monitored by TLC), the dark black reaction mixture was allowed to cool to room temperature, filtered through a plug of silica gel, and washed with DCM to elute all organic materials. The filtrate was concentrated by vacuum, re-dissolved in DCM, and separated by preparative TLC.

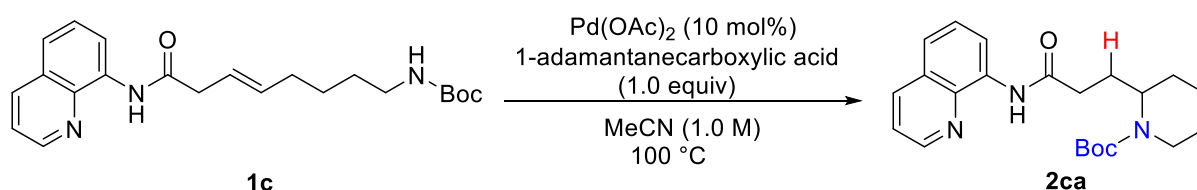

**tert-butyl 2-(3-oxo-3-(quinolin-8-ylamino)propyl)piperidine-1-carboxylate (2ca):** The reaction was carried out according to General Procedure C. The product was purified by preparative TLC (1:1 hexanes:EtOAc) to afford 35.1 mg (92%) of **2ca** as a colorless oil. <sup>1</sup>H NMR (600 MHz, CDCl<sub>3</sub>) δ 9.82 (s, 1H), 8.79 (dd, *J* = 4.2, 1.7 Hz, 1H), 8.76 (dd, *J* = 7.5, 1.5 Hz, 1H), 8.15 (dd, *J* = 8.2, 1.7 Hz, 1H), 7.55–7.46 (m, 2H), 7.44 (dd, *J* = 8.2, 4.1 Hz, 1H), 4.37 (s, 1H), 4.02 (s, 1H), 2.85 (s, 1H), 2.59–2.47 (m, 2H), 2.27 (s, 1H), 1.89 (d, *J* = 7.6 Hz, 1H), 1.69–1.58 (m, 5H), 1.40 (m, 10H); <sup>13</sup>C NMR (150 MHz, CDCl<sub>3</sub>) δ 171.5, 155.4, 148.2, 138.4, 136.4, 134.7, 128.0, 127.5, 121.7, 121.5, 116.5, 79.5, 50.2, 38.9, 34.9, 29.2, 28.5, 25.8, 25.7, 19.3; HRMS (ESI-TOF) Calcd for C<sub>22</sub>H<sub>30</sub>N<sub>3</sub>O<sub>3</sub><sup>+</sup> [M+H] 384.2287, found 384.2282.

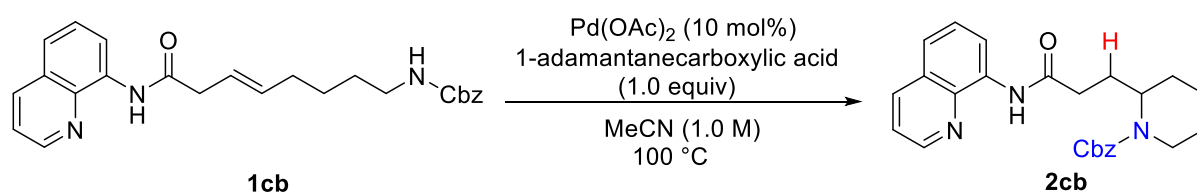

**benzyl 2-(3-oxo-3-(quinolin-8-ylamino)propyl)piperidine-1-carboxylate (2cb):** The reaction was carried out according to General Procedure C. The product was purified by preparative TLC (2:1 hexanes:EtOAc) to afford 37.2 mg (89%) of **2cb** as a colorless oil. <sup>1</sup>H NMR (600 MHz, CDCl<sub>3</sub>) δ 9.76 (s, 1H), 8.81 (dd, *J* = 4.2, 1.7 Hz, 1H), 8.74 (d, *J* = 6.7 Hz, 1H), 8.14 (dd, *J* = 8.2, 1.7 Hz, 1H), 7.53–7.47 (m, 2H), 7.44 (dd, *J* = 8.3, 4.2 Hz, 1H), 7.26 (m, 5H), 5.05 (d, *J* = 11.6 Hz, 2H), 4.46 (s, 1H), 4.07 (s, 1H), 2.94 (s, 1H), 2.51 (m, 2H), 2.35 (s, 1H), 1.88 (s, 1H), 1.73–1.63 (m, 5H), 1.42 (s, 1H); <sup>13</sup>C NMR (150 MHz, CDCl<sub>3</sub>) δ 171.3, 155.8, 148.2, 138.4, 136.9, 136.4, 134.7, 128.5, 128.1, 127.9, 127.8, 127.5, 121.7, 121.5, 116.5, 67.1, 50.8, 39.3, 38.9, 36.6, 29.3, 28.0, 25.7, 19.2; HRMS (ESI-TOF) Calcd for C<sub>25</sub>H<sub>28</sub>N<sub>3</sub>O<sub>3</sub><sup>+</sup> [M+H] 418.2131, found 418.2134.

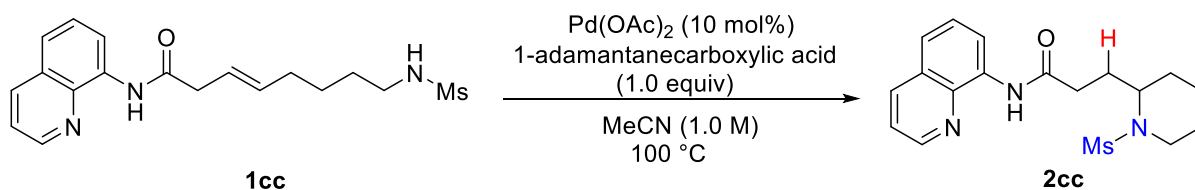

**3-(1-(methylsulfonyl)piperidin-2-yl)-N-(quinolin-8-yl)propanamide (2cc):** The reaction was carried out according to General Procedure C. The product was purified by preparative TLC (1:1 hexanes:EtOAc) to afford 29.7 mg (82%) of **2cc** as a light-yellow solid. <sup>1</sup>H NMR (600 MHz, CDCl<sub>3</sub>) δ 9.83 (s, 1H), 8.80 (dd, *J* = 4.2, 1.7 Hz, 1H), 8.75 (dd, *J* = 7.4, 1.5 Hz, 1H), 8.14 (dd, *J* = 8.2, 1.7 Hz, 1H), 7.54–7.48 (m, 2H), 7.44 (dd, *J* = 8.2, 4.2 Hz, 1H), 4.09 (dt, *J* = 10.1, 4.9 Hz, 1H), 3.76 (dq, *J* = 14.7, 1.9 Hz, 1H), 3.14 (ddd, *J* = 14.6, 13.3, 2.8 Hz, 1H), 2.91 (s, 3H), 2.69–2.65 (m, 2H), 2.38–2.31 (m, 1H), 1.93 (dtd, *J* = 14.1, 7.6, 5.0 Hz, 1H), 1.80–1.65 (m, 5H), 1.54–1.46 (m, 1H); <sup>13</sup>C NMR (150 MHz, CDCl<sub>3</sub>) δ 171.2, 148.3, 138.5, 136.4, 134.7, 128.1, 127.5, 121.8, 121.6, 116.5, 52.6, 41.0, 40.6, 34.8, 29.0, 25.4, 25.2, 18.8; HRMS (ESI-TOF) Calcd for C<sub>18</sub>H<sub>24</sub>N<sub>3</sub>O<sub>3</sub>S<sup>+</sup> [M+H] 362.1538, found 362.1533.

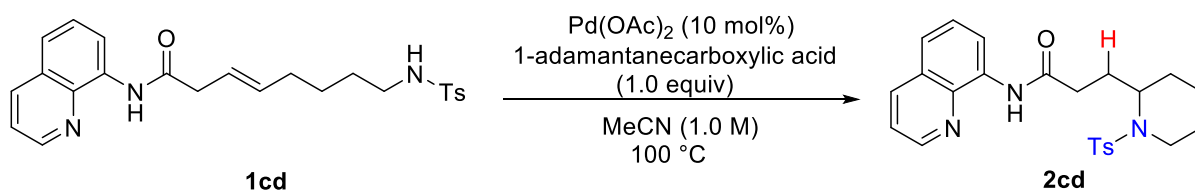

**N-(quinolin-8-yl)-3-(1-(tosyl)piperidin-2-yl)propanamide (2cd):** The reaction was carried out according to General Procedure C. The product was purified by preparative TLC (2:1 hexanes:EtOAc) to afford 42.1 mg (97%) of **2cd** as a light-yellow solid. <sup>1</sup>H NMR (600 MHz, CDCl<sub>3</sub>) δ 9.82 (s, 1H), 8.82 (dd, *J* = 4.2, 1.7 Hz, 1H), 8.75 (dd, *J* = 7.4, 1.5 Hz, 1H), 8.15 (dd, *J* = 8.3, 1.7 Hz, 1H), 7.74 (d, *J* = 8.2 Hz, 2H), 7.54–7.48 (m, 2H), 7.45 (dd, *J* = 8.2, 4.2 Hz, 1H), 7.26 (d, *J* = 7.7 Hz, 2H), 4.14 (dt, *J* = 10.5, 5.0 Hz, 1H), 3.88–3.83 (m, 1H), 3.11 (ddd, *J* = 14.6, 13.3, 2.9 Hz, 1H), 2.71–2.61 (m, 2H), 2.36 (s, 3H), 2.33–2.25 (m, 1H), 1.84 (dddd, *J* = 14.1, 9.3, 6.6, 4.7 Hz, 1H), 1.58 (dddd, *J* = 16.9, 13.1, 8.8, 3.9 Hz, 1H), 1.50–1.36 (m, 4H), 1.12 (qt, *J* = 13.2, 4.3 Hz, 1H); <sup>13</sup>C NMR (150 MHz, CDCl<sub>3</sub>) δ 171.4, 148.3, 143.0, 139.1, 138.5, 136.4, 134.7, 129.8, 128.1, 127.5, 127.1, 121.7, 121.5, 116.4, 52.8, 40.8, 34.8, 28.1, 25.4, 24.1, 21.6, 18.7; HRMS (ESI-TOF) Calcd for C<sub>24</sub>H<sub>28</sub>N<sub>3</sub>O<sub>3</sub>S<sup>+</sup> [M+H] 438.1851, found 438.1851.

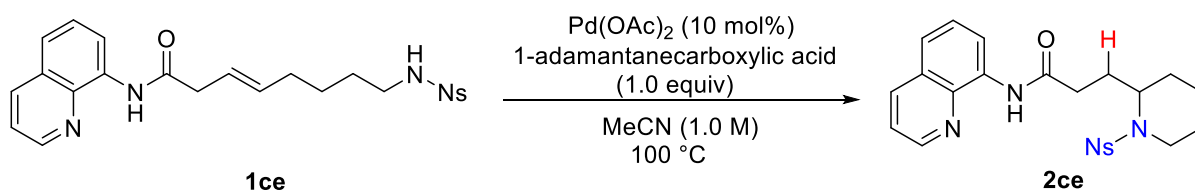

**3-(1-(4-nitrophenylsulfonyl)piperidin-2-yl)-N-(quinolin-8-yl)propanamide (2ce):** The reaction was carried out according to General Procedure C. The product was purified by preparative TLC (2:1 hexanes:EtOAc) to afford 15.0 mg (32%) of **2ce** as a light-yellow oil.

**<sup>1</sup>H NMR** (600 MHz, CDCl<sub>3</sub>) δ 9.78 (s, 1H), 8.82 (dd, *J* = 4.2, 1.7 Hz, 1H), 8.73 (dd, *J* = 7.3, 1.7 Hz, 1H), 8.32–8.26 (m, 2H), 8.17 (dd, *J* = 8.3, 1.7 Hz, 1H), 8.06–8.01 (m, 2H), 7.55–7.50 (m, 2H), 7.47 (dd, *J* = 8.2, 4.2 Hz, 1H), 4.21 (dt, *J* = 10.4, 5.1 Hz, 1H), 3.91–3.87 (m, 1H), 3.19 (ddd, *J* = 14.5, 13.4, 2.6 Hz, 1H), 2.64 (t, *J* = 7.4 Hz, 2H), 2.30 (ddd, *J* = 14.4, 7.2, 3.2 Hz, 1H), 1.93–1.88 (m, 1H), 1.59 (d, *J* = 4.1 Hz, 2H), 1.55–1.50 (m, 2H), 1.40 (tq, *J* = 12.0, 3.6 Hz, 1H), 1.16–1.09 (m, 1H); **<sup>13</sup>C NMR** (150 MHz, CDCl<sub>3</sub>) δ 170.8, 149.9, 148.4, 147.8, 138.4, 136.5, 134.6, 128.2, 128.1, 127.5, 124.6, 121.8, 121.7, 116.5, 53.4, 41.2, 34.4, 28.4, 25.2, 24.5, 18.5; **HRMS** (ESI-TOF) Calcd for C<sub>23</sub>H<sub>25</sub>N<sub>4</sub>O<sub>5</sub>S<sup>+</sup> [M+H] 469.1546, found 469.1546.

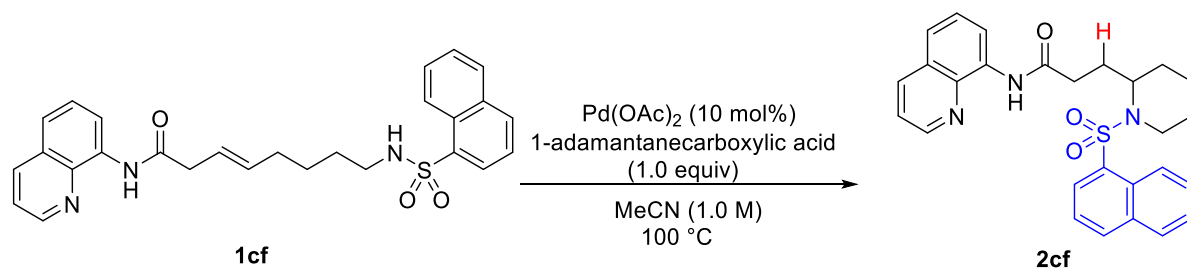

**3-(1-(naphthalen-1-ylsulfonyl)piperidin-2-yl)-N-(quinolin-8-yl)propanamide (2cf):** The reaction was carried out according to General Procedure C. The product was purified by preparative TLC (2:1 hexanes:EtOAc) to afford 35.7 mg (75%) of **2cf** as a colorless oil. **<sup>1</sup>H NMR** (600 MHz, CDCl<sub>3</sub>) δ 9.78 (s, 1H), 8.82 (dd, *J* = 4.2, 1.7 Hz, 1H), 8.73 (dd, *J* = 7.3, 1.7 Hz, 1H), 8.32–8.26 (m, 2H), 8.17 (dd, *J* = 8.3, 1.7 Hz, 1H), 8.06–8.01 (m, 2H), 7.55–7.50 (m, 2H), 7.47 (dd, *J* = 8.2, 4.2 Hz, 1H), 4.21 (dt, *J* = 10.4, 5.1 Hz, 1H), 3.91–3.87 (m, 1H), 3.19 (ddd, *J* = 14.5, 13.4, 2.6 Hz, 1H), 2.64 (t, *J* = 7.4 Hz, 2H), 2.30 (ddd, *J* = 14.4, 7.2, 3.2 Hz, 1H), 1.93–1.88 (m, 1H), 1.59 (d, *J* = 4.1 Hz, 2H), 1.55–1.50 (m, 2H), 1.40 (tq, *J* = 12.0, 3.6 Hz, 1H), 1.16–1.09 (m, 1H); **<sup>13</sup>C NMR** (150 MHz, CDCl<sub>3</sub>) δ 171.3, 148.3, 138.8, 138.5, 136.4, 134.7, 134.7, 132.4, 129.6, 129.3, 128.6, 128.1, 128.0, 127.9, 127.5, 127.5, 122.6, 121.7, 121.5, 116.4, 53.0, 40.9, 34.7, 28.3, 25.5, 24.3, 18.6; **HRMS** (ESI-TOF) Calcd for C<sub>27</sub>H<sub>28</sub>N<sub>3</sub>O<sub>3</sub>S<sup>+</sup> [M+H] 474.1851, found 474.1855.

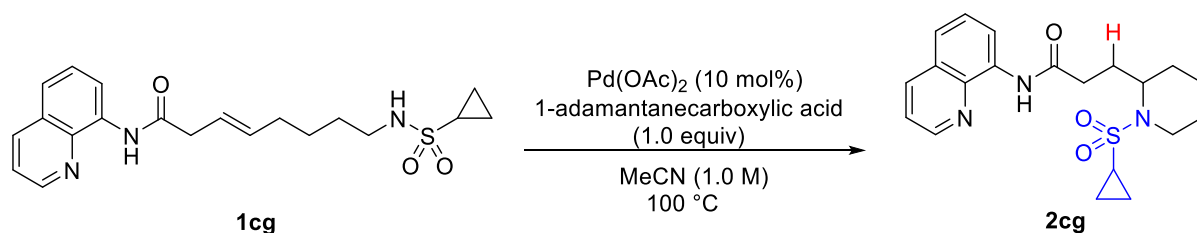

**3-(1-(cyclopropylsulfonyl)piperidin-2-yl)-N-(quinolin-8-yl)propanamide (2cg):** The reaction was carried out according to General Procedure C. The product was purified by preparative TLC (1:1 hexanes:EtOAc) to afford 30.7 mg (80%) of **2cg** as a colorless oil. **<sup>1</sup>H NMR** (600 MHz, CDCl<sub>3</sub>) δ 9.82 (s, 1H), 8.79 (dd, *J* = 4.2, 1.7 Hz, 1H), 8.74 (dd, *J* = 7.4, 1.5 Hz, 1H), 8.13 (dd, *J* = 8.2, 1.7 Hz, 1H), 7.53–7.47 (m, 2H), 7.43 (dd, *J* = 8.2, 4.2 Hz, 1H), 4.05 (dt, *J* = 10.4, 5.1 Hz, 1H), 3.75 (ddd, *J* = 14.8, 4.7, 1.9 Hz, 1H), 3.14 (ddd, *J* = 14.6, 13.0, 3.0 Hz, 1H), 2.67 (td, *J* = 8.9, 6.3 Hz, 2H), 2.40–2.32 (m, 2H), 1.94–1.88 (m, 1H), 1.86–1.80 (m, 1H), 1.69 (dd, *J* = 7.2, 3.3 Hz, 2H), 1.56 (dddd, *J* = 18.7, 9.8, 7.5, 3.8 Hz, 1H), 1.20–1.16 (m, 2H), 0.99–0.94 (m, 2H); **<sup>13</sup>C NMR** (150 MHz, CDCl<sub>3</sub>) δ 171.3, 148.3, 138.4, 136.4, 134.7, 128.0, 127.4, 121.7, 121.5, 116.5, 52.9, 40.9, 34.8, 31.1, 29.2, 25.4, 25.4, 18.8, 5.7; **HRMS** (ESI-TOF) Calcd for C<sub>20</sub>H<sub>26</sub>N<sub>3</sub>O<sub>3</sub>S<sup>+</sup> [M+H] 388.1695, found 388.1699.

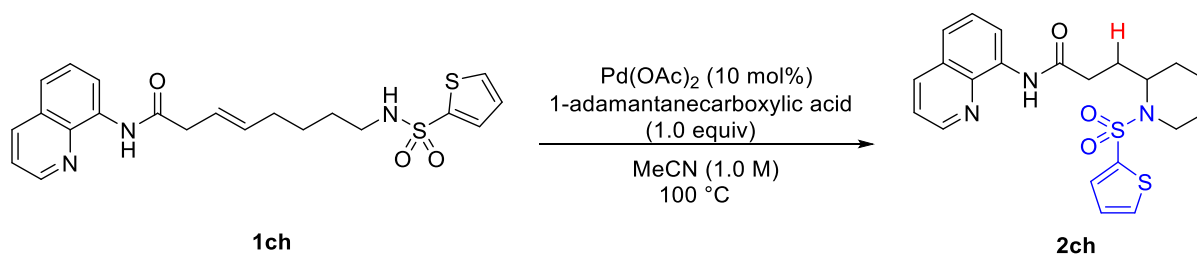

***N*-(quinolin-8-yl)-3-(1-(thiophen-2-ylsulfonyl)piperidin-2-yl)propanamide (2ch):** The reaction was carried out according to General Procedure C. The product was purified by preparative TLC (1:1 hexanes:EtOAc) to afford 37.6 mg (88%) of **2ch** as a colorless oil. <sup>1</sup>H NMR (600 MHz, CDCl<sub>3</sub>) δ 9.84 (s, 1H), 8.82 (dd, *J* = 4.2, 1.7 Hz, 1H), 8.75 (dd, *J* = 7.5, 1.5 Hz, 1H), 8.15 (dd, *J* = 8.3, 1.7 Hz, 1H), 7.58 (dd, *J* = 3.7, 1.3 Hz, 1H), 7.54–7.48 (m, 3H), 7.45 (dd, *J* = 8.2, 4.2 Hz, 1H), 7.05 (dd, *J* = 5.0, 3.7 Hz, 1H), 4.19 (dt, *J* = 10.3, 5.0 Hz, 1H), 3.92–3.87 (m, 1H), 3.16 (ddd, *J* = 14.6, 13.2, 2.8 Hz, 1H), 2.73–2.63 (m, 2H), 2.32 (dddd, *J* = 14.2, 10.4, 9.1, 6.1 Hz, 1H), 1.88 (dddd, *J* = 14.0, 9.2, 6.6, 4.8 Hz, 1H), 1.63–1.46 (m, 5H), 1.26–1.22 (m, 1H); <sup>13</sup>C NMR (150 MHz, CDCl<sub>3</sub>) δ 171.3, 148.3, 142.9, 138.5, 136.4, 134.7, 131.5, 131.3, 128.0, 127.5, 127.5, 121.7, 121.5, 116.5, 53.3, 41.1, 34.8, 28.1, 25.5, 24.1, 18.6; HRMS (ESI-TOF) Calcd for C<sub>21</sub>H<sub>24</sub>N<sub>3</sub>O<sub>3</sub>S<sub>2</sub><sup>+</sup> [M+H] 430.1259, found 430.1253.

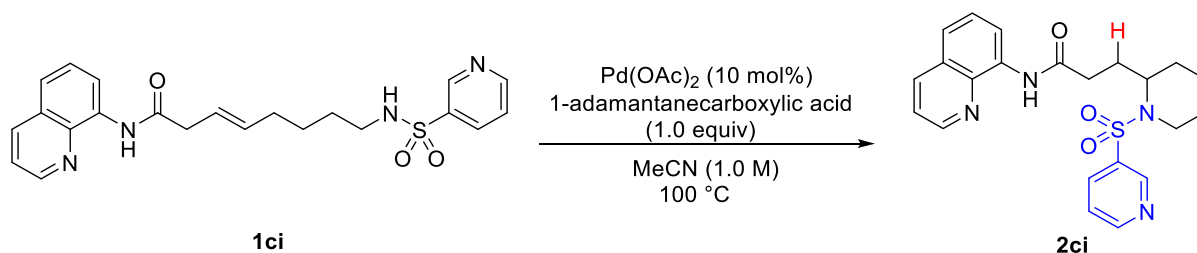

**3-(1-(pyridin-3-ylsulfonyl)piperidin-2-yl)-*N*-(quinolin-8-yl)propanamide (2ci):** The reaction was carried out according to General Procedure C. The product was purified by preparative TLC (1:1 hexanes:EtOAc) to afford 28.6 mg (67%) of **2ci** as a colorless oil. <sup>1</sup>H NMR (600 MHz, CDCl<sub>3</sub>) δ 9.84 (s, 1H), 9.09 (dd, *J* = 2.3, 0.8 Hz, 1H), 8.83 (dd, *J* = 4.2, 1.7 Hz, 1H), 8.75 (dt, *J* = 6.0, 1.4 Hz, 2H), 8.17–8.12 (m, 2H), 7.55–7.49 (m, 2H), 7.45 (dd, *J* = 8.2, 4.2 Hz, 1H), 7.41 (ddd, *J* = 8.0, 4.9, 0.9 Hz, 1H), 4.19 (dt, *J* = 10.4, 5.0 Hz, 1H), 3.86 (ddd, *J* = 14.6, 3.7, 2.0 Hz, 1H), 3.18 (ddd, *J* = 14.7, 13.5, 2.6 Hz, 1H), 2.68 (ddd, *J* = 7.9, 6.9, 2.0 Hz, 2H), 2.32 (dddd, *J* = 14.7, 10.4, 8.0, 6.8 Hz, 1H), 1.90 (dddd, *J* = 14.3, 8.3, 7.2, 4.9 Hz, 1H), 1.65–1.48 (m, 4H), 1.36 (tdd, *J* = 13.6, 5.5, 3.7 Hz, 1H), 1.10 (tdd, *J* = 13.1, 9.1, 4.6 Hz, 1H); <sup>13</sup>C NMR (150 MHz, CDCl<sub>3</sub>) δ 171.0, 153.0, 148.3, 148.0, 138.6, 138.5, 136.4, 134.7, 134.6, 128.1, 127.5, 123.9, 121.8, 121.6, 116.5, 53.2, 41.0, 34.6, 28.3, 25.4, 24.3, 18.6; HRMS (ESI-TOF) Calcd for C<sub>22</sub>H<sub>25</sub>N<sub>4</sub>O<sub>3</sub>S<sup>+</sup> [M+H] 425.1647, found 425.1642.

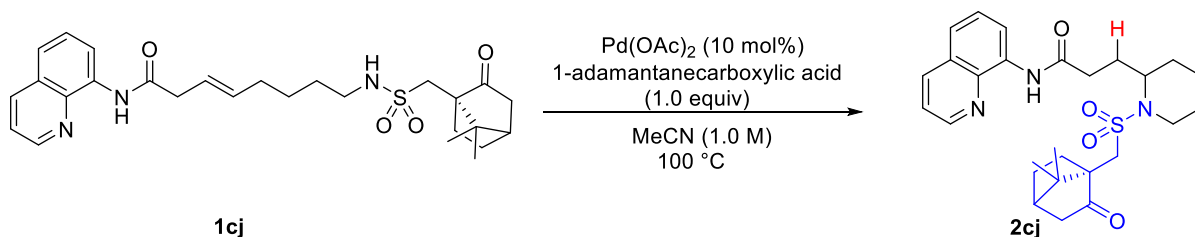

**3-(1-(((1*S*)-7,7-dimethyl-2-oxobicyclo[2.2.1]heptan-1-yl)methyl)sulfonyl)piperidin-2-yl)-*N*-(quinolin-8-yl)propanamide (2cj):** The reaction was carried out according to General Procedure C. The product was purified by preparative TLC (1:1 hexanes:EtOAc) to afford 35.1 mg (71%) of **2cj** as a colorless oil. The product was isolated as a 1:1 mixture of diastereomers. The ensuing analytical data corresponds to the mixture.  $^1\text{H NMR}$  (600 MHz,  $\text{CDCl}_3$ )  $\delta$  9.83 (d,  $J = 3.2$  Hz, 1H), 8.79 (dt,  $J = 4.2, 1.8$  Hz, 1H), 8.74 (dd,  $J = 7.5, 1.5$  Hz, 1H), 8.14 (dd,  $J = 8.2, 1.7$  Hz, 1H), 7.53–7.47 (m, 2H), 7.43 (dd,  $J = 8.2, 4.2$  Hz, 1H), 4.12 (ddt,  $J = 11.9, 10.1, 4.5$  Hz, 1H), 3.79 (td,  $J = 13.9, 4.4$  Hz, 1H), 3.41 (dd,  $J = 14.5, 12.8$  Hz, 1H), 3.15 (dddd,  $J = 14.4, 12.9, 10.4, 2.6$  Hz, 1H), 2.85 (dd,  $J = 14.5, 7.2$  Hz, 1H), 2.74–2.63 (m, 2H), 2.56 (dddd,  $J = 14.9, 11.4, 7.2, 4.0$  Hz, 1H), 2.40–2.32 (m, 2H), 2.07 (td,  $J = 4.5, 1.6$  Hz, 1H), 2.05–2.00 (m, 1H), 1.96–1.89 (m, 2H), 1.84–1.74 (m, 1H), 1.70 (ddt,  $J = 8.6, 5.9, 3.0$  Hz, 3H), 1.63 (dddd,  $J = 15.9, 9.4, 4.9, 2.5$  Hz, 2H), 1.60–1.49 (m, 1H), 1.40 (ddd,  $J = 13.1, 9.3, 4.0$  Hz, 1H), 1.14 (d,  $J = 8.8$  Hz, 3H), 0.87 (d,  $J = 15.4$  Hz, 3H);  $^{13}\text{C NMR}$  (150 MHz,  $\text{CDCl}_3$ )  $\delta$  215.5, 215.4, 171.4, 171.3, 148.2, 138.5, 138.5, 136.4, 136.3, 134.7, 134.7, 128.0, 127.5, 127.5, 121.7, 121.5, 116.5, 58.8, 52.7, 52.5, 50.4, 50.1, 47.8, 47.8, 43.1, 43.0, 42.7, 40.7, 40.6, 35.0, 34.9, 29.3, 29.1, 27.0, 27.0, 25.6, 25.6, 25.5, 25.5, 25.3, 25.2, 20.3, 20.2, 20.0, 19.9, 18.8, 18.8; **HRMS** (ESI-TOF) Calcd for  $\text{C}_{27}\text{H}_{36}\text{N}_3\text{O}_4\text{S}^+$  [ $\text{M}+\text{H}$ ] 498.2427, found 498.2438.

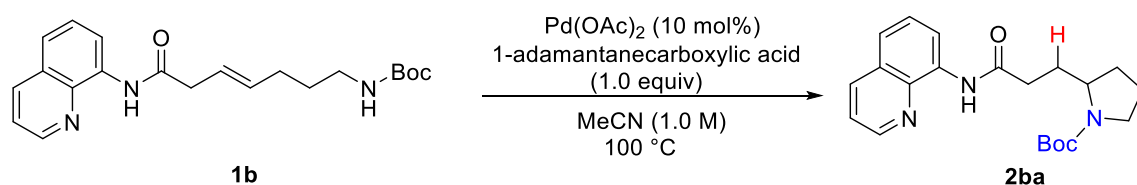

**tert-butyl 2-(3-oxo-3-(quinolin-8-ylamino)propyl)pyrrolidine-1-carboxylate (2ba):** The reaction was carried out according to General Procedure C. The product was purified by preparative TLC (1:1 hexanes:EtOAc) to afford 33.5 mg (91%) of **2ba** as a colorless oil.  $^1\text{H NMR}$  (600 MHz,  $\text{CDCl}_3$ )  $\delta$  9.86 (s, 1H), 8.79 (dd,  $J = 4.2, 1.7$  Hz, 1H), 8.78–8.74 (m, 1H), 8.15 (d,  $J = 8.1$  Hz, 1H), 7.50 (dd,  $J = 18.6, 7.9$  Hz, 2H), 7.44 (d,  $J = 8.0$  Hz, 1H), 3.93 (d,  $J = 45.2$  Hz, 1H), 3.41 (m, 2H), 2.56 (m, 1H), 2.22–2.13 (m, 1H), 2.05–1.79 (m, 4H), 1.73 (m, 1H), 1.46 (s, 9H);  $^{13}\text{C NMR}$  (150 MHz,  $\text{CDCl}_3$ )  $\delta$  171.3, 154.9, 148.2, 138.5, 136.4, 134.8, 128.0, 127.5, 121.7, 121.5, 116.5, 79.2, 57.0, 38.8, 36.6, 30.7, 28.7, 28.6, 28.0; **HRMS** (ESI-TOF) Calcd for  $\text{C}_{21}\text{H}_{28}\text{N}_3\text{O}_3^+$  [ $\text{M}+\text{H}$ ] 370.2131, found 370.2130.

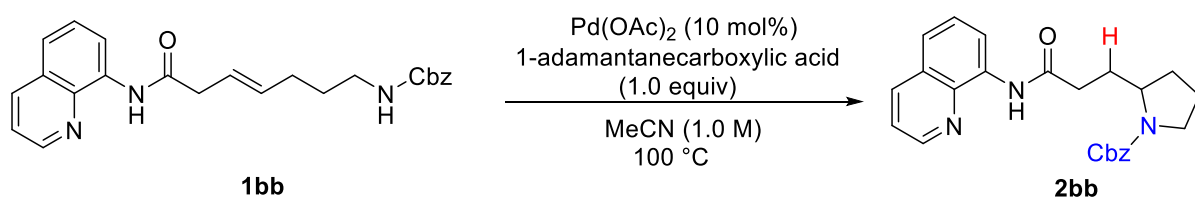

**benzyl 2-(3-oxo-3-(quinolin-8-ylamino)propyl)pyrrolidine-1-carboxylate (2bb):** The reaction was carried out according to General Procedure C. The product was purified by preparative TLC (2:1 hexanes:EtOAc) to afford 35.0 mg (87%) of **2bb** as a colorless oil.  $^1\text{H NMR}$  (600 MHz,  $\text{CDCl}_3$ )  $\delta$  9.80 (s, 1H), 8.83–8.72 (m, 2H), 8.15 (t,  $J = 9.4$  Hz, 1H), 7.55–7.43 (m, 3H), 7.33 (m, 3H), 7.30–7.17 (m, 2H), 5.18–5.03 (m, 2H), 4.10–4.00 (m, 1H), 3.57–3.41 (m, 2H), 2.70–2.61 (m, 1H), 2.53 (t,  $J = 8.0$  Hz, 1H), 2.21 (dt,  $J = 14.7, 7.4$  Hz, 1H), 2.02–1.92 (m, 3H), 1.87 (h,  $J = 4.9, 3.5$  Hz, 1H), 1.76 (d,  $J = 15.5$  Hz, 1H);  $^{13}\text{C NMR}$  (150 MHz,  $\text{CDCl}_3$ )  $\delta$  171.6, 155.5, 148.2, 138.5, 137.1, 136.4, 134.8, 128.5, 128.1, 127.9, 127.9, 127.5, 121.7, 121.5, 116.6, 67.0, 57.6, 46.4, 35.4, 31.1, 30.5, 23.9; **HRMS** (ESI-TOF) Calcd for  $\text{C}_{24}\text{H}_{26}\text{N}_3\text{O}_3^+$   $[\text{M}+\text{H}]$  404.1974, found 404.1982.

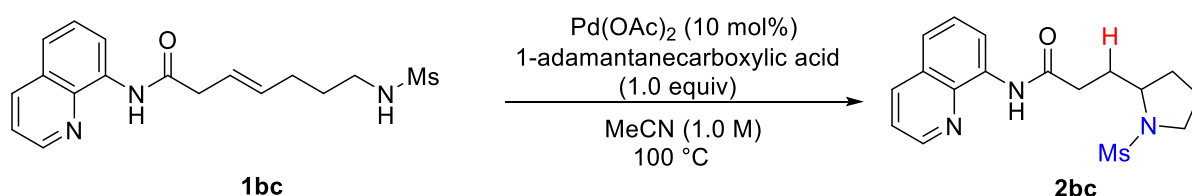

**3-(1-(methylsulfonyl)pyrrolidin-2-yl)-*N*-(quinolin-8-yl)propanamide (2bc):** The reaction was carried out according to General Procedure C. The product was purified by preparative TLC (1:1 hexanes:EtOAc) to afford 31.6 mg (91%) of **2bc** as a colorless oil.  $^1\text{H NMR}$  (600 MHz,  $\text{CDCl}_3$ )  $\delta$  9.85 (s, 1H), 8.80 (dd,  $J = 4.2, 1.7$  Hz, 1H), 8.74 (dd,  $J = 7.4, 1.6$  Hz, 1H), 8.14 (dd,  $J = 8.3, 1.7$  Hz, 1H), 7.54–7.47 (m, 2H), 7.44 (dd,  $J = 8.3, 4.2$  Hz, 1H), 3.89 (qd,  $J = 6.8, 3.4$  Hz, 1H), 3.46–3.35 (m, 2H), 2.82 (s, 3H), 2.71 (t,  $J = 7.7$  Hz, 2H), 2.12 (dq,  $J = 14.7, 7.4$  Hz, 1H), 2.07–1.98 (m, 3H), 1.96–1.89 (m, 1H), 1.85–1.78 (m, 1H);  $^{13}\text{C NMR}$  (150 MHz,  $\text{CDCl}_3$ )  $\delta$  171.3, 148.3, 138.5, 136.4, 134.7, 128.1, 127.5, 121.8, 121.6, 116.5, 60.0, 48.9, 35.5, 34.6, 31.7, 31.6, 24.7; **HRMS** (ESI-TOF) Calcd for  $\text{C}_{17}\text{H}_{22}\text{N}_3\text{O}_3\text{S}^+$   $[\text{M}+\text{H}]$  348.1382, found 348.1383.

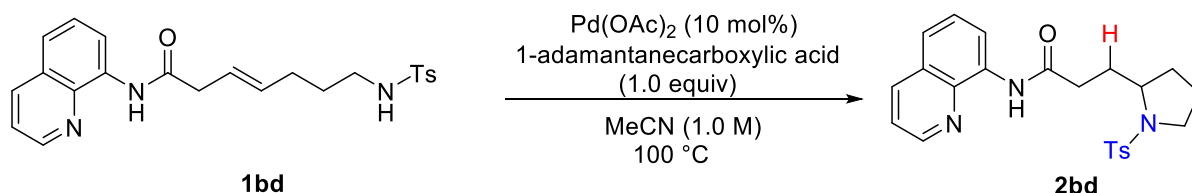

***N*-(quinolin-8-yl)-3-(1-tosylpyrrolidin-2-yl)propanamide (2bd):** The reaction was carried out according to General Procedure C. The product was purified by preparative TLC (2:1 hexanes:EtOAc) to afford 37.8 mg (89%) of **2bd** as a colorless oil.  $^1\text{H NMR}$  (600 MHz,  $\text{CDCl}_3$ )  $\delta$  9.90 (s, 1H), 8.82 (dd,  $J = 4.2, 1.7$  Hz, 1H), 8.77 (dd,  $J = 7.5, 1.5$  Hz, 1H), 8.17–8.14 (m, 1H), 7.73–7.71 (m, 2H), 7.55–7.49 (m, 2H), 7.45 (dd,  $J = 8.2, 4.2$  Hz, 1H), 7.26 (d,  $J = 1.4$  Hz, 2H), 3.86–3.82 (m, 1H), 3.43 (ddd,  $J = 10.5, 7.5, 4.6$  Hz, 1H), 3.25 (dt,  $J = 10.9, 7.4$  Hz, 1H), 2.83–2.73 (m, 2H), 2.40 (s, 3H), 2.13 (ddt,  $J = 14.0, 8.4, 6.7$  Hz, 1H), 2.06–2.00 (m, 1H), 1.88–1.80 (m, 1H), 1.63–1.48 (m, 3H);  $^{13}\text{C NMR}$  (150 MHz,  $\text{CDCl}_3$ )  $\delta$  171.5, 148.3, 143.5, 138.5, 136.4, 134.9, 134.8, 129.8, 128.1, 127.7, 127.5, 121.7, 121.5, 116.5, 60.1, 49.0, 34.7, 31.7, 31.3, 24.2, 21.6; **HRMS** (ESI-TOF) Calcd for  $\text{C}_{23}\text{H}_{26}\text{N}_3\text{O}_3\text{S}^+$   $[\text{M}+\text{H}]$  424.1695, found 424.1695.

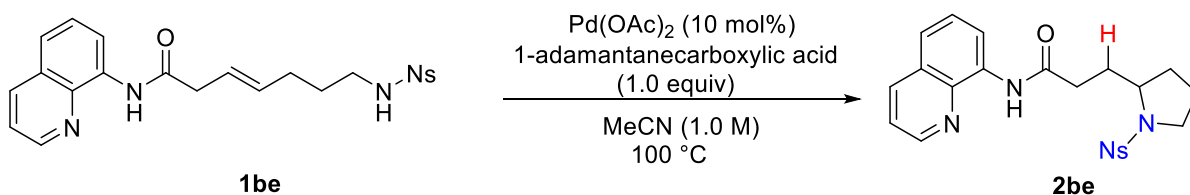

**3-(1-((4-nitrophenyl)sulfonyl)pyrrolidin-2-yl)-N-(quinolin-8-yl)propanamide (2be):** The reaction was carried out according to General Procedure C. The product was purified by preparative TLC (2:1 hexanes:EtOAc) to afford 33.1 mg (73%) of **2be** as a colorless oil. <sup>1</sup>H NMR (600 MHz, CDCl<sub>3</sub>) δ 9.88 (s, 1H), 8.82 (dd, *J* = 4.2, 1.7 Hz, 1H), 8.77 (dd, *J* = 7.4, 1.6 Hz, 1H), 8.35–8.29 (m, 2H), 8.17 (dd, *J* = 8.3, 1.7 Hz, 1H), 8.06–8.00 (m, 2H), 7.57–7.51 (m, 2H), 7.47 (dd, *J* = 8.2, 4.2 Hz, 1H), 3.89 (qd, *J* = 7.0, 3.5 Hz, 1H), 3.51 (ddd, *J* = 10.7, 7.6, 4.6 Hz, 1H), 3.27 (dt, *J* = 10.5, 7.4 Hz, 1H), 2.79 (ddd, *J* = 15.2, 8.2, 6.7 Hz, 1H), 2.72 (ddd, *J* = 15.3, 8.2, 6.6 Hz, 1H), 2.20 (ddt, *J* = 13.7, 8.2, 6.7 Hz, 1H), 2.06–2.01 (m, 1H), 1.96–1.89 (m, 1H), 1.70 (tt, *J* = 10.8, 3.8 Hz, 1H), 1.66–1.58 (m, 2H); <sup>13</sup>C NMR (150 MHz, CDCl<sub>3</sub>) δ 171.0, 150.2, 148.4, 143.8, 138.5, 136.5, 134.6, 128.8, 128.1, 127.5, 124.5, 121.8, 121.7, 116.6, 60.4, 49.1, 34.4, 31.4, 31.4, 24.2; HRMS (ESI-TOF) Calcd for C<sub>22</sub>H<sub>23</sub>N<sub>4</sub>O<sub>5</sub>S<sup>+</sup> [M+H] 455.1389, found 455.1395.

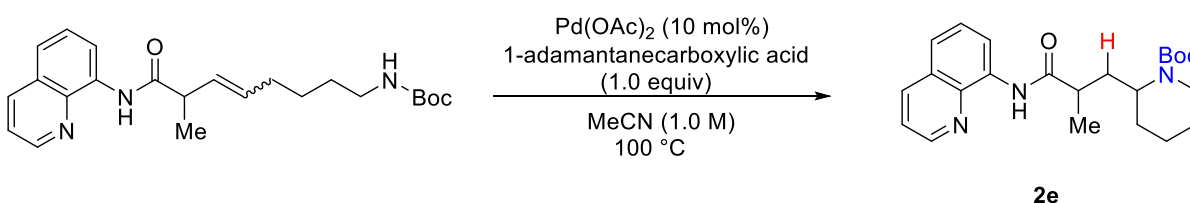

**tert-butyl 2-(2-methyl-3-oxo-3-(quinolin-8-ylamino)propyl)piperidine-1-carboxylate (2e):** The reaction was carried out according to General Procedure C. The product was purified by preparative TLC (3:1 hexanes:EtOAc) to afford 35.2 mg (88%) of **2e** as a colorless oil (1.5:1 dr, as determined by LC). The ensuing analytical data correspond to the diastereomeric mixture. <sup>1</sup>H NMR (600 MHz, CDCl<sub>3</sub>) δ 9.87 (s, 1H), 9.04–8.64 (m, 3H), 8.16 (dd, *J* = 8.2, 1.7 Hz, 2H), 7.62–7.36 (m, 4H), 4.42 (br, 1H), 4.06 (br, 1H), 2.88 (br, 1H), 2.66–2.54 (m, 1H), 2.11–1.85 (m, 2H), 1.77–1.55 (m, 6H), 1.46–1.35 (m, 3H), 1.52–1.16 (m, 9H). <sup>13</sup>C NMR (150 MHz, CDCl<sub>3</sub>) δ 174.74, 154.76 (d, *J* = 11.8 Hz), 147.71, 138.04, 135.81, 134.28 (d, *J* = 16.1 Hz), 127.44, 126.93 (d, *J* = 2.8 Hz), 121.09, 120.87, 115.98, 78.83, 48.20, 38.22, 35.99, 33.72, 27.87, 27.79, 27.40, 25.19, 18.63. HRMS (ESI-TOF) Calcd for C<sub>21</sub>H<sub>31</sub>N<sub>3</sub>O<sub>3</sub><sup>+</sup> [M+H] 384.2287, found 384.2286.

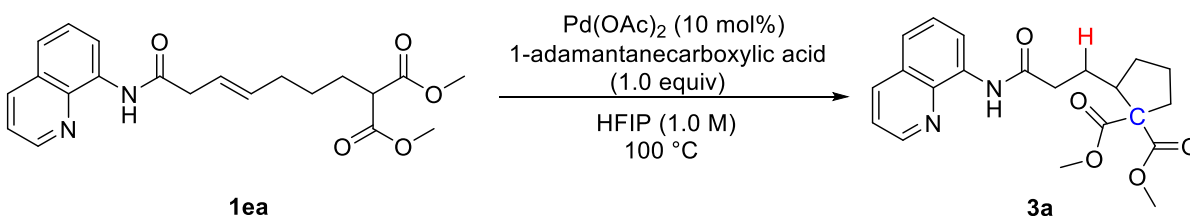

**dimethyl 2-(3-oxo-3-(quinolin-8-ylamino)propyl)cyclopentane-1,1-dicarboxylate (3a):** The reaction was carried out according to General Procedure C with HFIP instead of acetonitrile as solvent. The product was purified by preparative TLC (2:1 hexanes:EtOAc) to afford 30.0 mg (79%) of **3a** as a colorless oil. <sup>1</sup>H NMR (600 MHz, CDCl<sub>3</sub>) δ 9.80 (s, 1H), 8.80 (dd, *J* = 4.2, 1.7 Hz, 1H), 8.77 (dd, *J* = 7.4, 1.5 Hz, 1H), 8.16 (dd, *J* = 8.3, 1.7 Hz, 1H),



7.54–7.48 (m, 2H), 7.45 (dd,  $J = 8.2, 4.2$  Hz, 1H), 3.75 (s, 3H), 3.72 (s, 3H), 2.67–2.56 (m, 3H), 2.46 (ddd,  $J = 13.8, 8.7, 7.2$  Hz, 1H), 2.11–2.00 (m, 3H), 1.92–1.85 (m, 1H), 1.69 (dtd,  $J = 13.5, 9.8, 6.0$  Hz, 1H), 1.62–1.56 (m, 1H), 1.50 (ddt,  $J = 12.5, 10.5, 9.0$  Hz, 1H);  $^{13}\text{C}$  NMR (150 MHz,  $\text{CDCl}_3$ )  $\delta$  173.1, 172.0, 171.5, 148.2, 138.5, 136.5, 134.7, 128.1, 127.6, 121.7, 121.5, 116.6, 63.5, 52.7, 52.4, 46.3, 37.4, 35.0, 31.1, 27.5, 23.1; **HRMS** (ESI-TOF) Calcd for  $\text{C}_{21}\text{H}_{25}\text{N}_2\text{O}_5^+$  [M+H] 385.1763, found 385.1771.

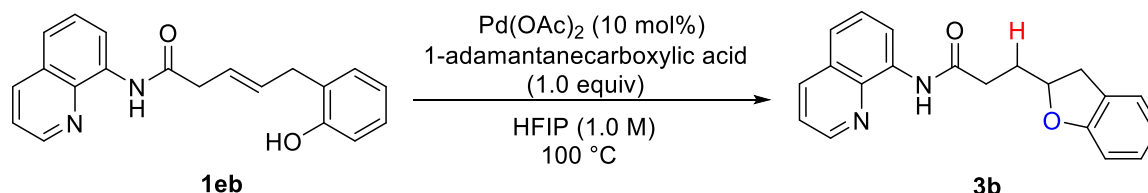

**3-(2,3-dihydrobenzofuran-2-yl)-N-(quinolin-8-yl)propanamide (3b):** The reaction was carried out according to General Procedure C with HFIP instead of acetonitrile as solvent. The product was purified by preparative TLC (3:1 hexanes:EtOAc) to afford 22.5 mg (71%) of **2eb** as a colorless oil.  $^1\text{H}$  NMR (600 MHz,  $\text{CDCl}_3$ )  $\delta$  9.88 (s, 1H), 8.81 (dd,  $J = 4.2, 1.7$  Hz, 1H), 8.78 (dd,  $J = 7.5, 1.6$  Hz, 1H), 8.16 (dd,  $J = 8.2, 1.7$  Hz, 1H), 7.56–7.49 (m, 2H), 7.46 (dd,  $J = 8.2, 4.2$  Hz, 1H), 7.16 (dd,  $J = 7.3, 1.3$  Hz, 1H), 7.10 (dddd,  $J = 8.8, 7.4, 1.5, 0.8$  Hz, 1H), 6.83 (td,  $J = 7.4, 1.0$  Hz, 1H), 6.78 (d,  $J = 7.8$  Hz, 1H), 4.93 (tdd,  $J = 8.8, 7.5, 4.3$  Hz, 1H), 3.37 (dd,  $J = 15.5, 9.0$  Hz, 1H), 2.96 (dd,  $J = 15.5, 7.5$  Hz, 1H), 2.86–2.76 (m, 2H), 2.30 (dddd,  $J = 14.1, 8.7, 7.1, 4.3$  Hz, 1H), 2.21 (dtd,  $J = 14.3, 8.5, 5.9$  Hz, 1H);  $^{13}\text{C}$  NMR (150 MHz,  $\text{CDCl}_3$ )  $\delta$  171.1, 159.5, 148.3, 138.5, 136.5, 134.6, 128.1, 128.1, 127.5, 126.8, 125.1, 121.8, 121.6, 120.5, 116.6, 109.5, 82.3, 35.6, 34.0, 31.8; **HRMS** (ESI-TOF) Calcd for  $\text{C}_{20}\text{H}_{19}\text{N}_2\text{O}_2^+$  [M+H] 319.1447, found 319.1449.

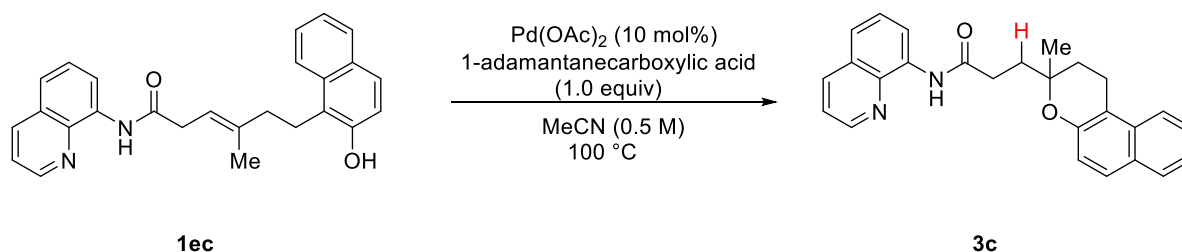

**3-(3-methyl-2,3-dihydro-1H-benzo[f]chromen-3-yl)-N-(quinolin-8-yl)propanamide (3c):** The reaction was carried out according to slightly modified version of General Procedure C. (*E*)-6-(3-hydroxy-1-methyl-2-naphthyl)-4-(quinolin-8-yl)hex-3-enamide (4.9 mg, 0.012 mmol), 1-adamantanecarboxylic acid (2.3 mg, 0.012 mmol) and 0.05 M  $\text{Pd}(\text{OAc})_2$  solution in MeCN (26  $\mu\text{L}$ , 0.0012 mmol [Pd]) was added, and heated to 100  $^\circ\text{C}$  for 15 h. The product was purified by preparative TLC (3:1 hexanes:EtOAc) to afford 4.2 mg (86%) of **XX** as a yellow solid. Analytical data were in agreement with literature values.<sup>[16]</sup>  $^1\text{H}$  NMR (500 MHz,  $\text{CDCl}_3$ )  $\delta$  9.86 (s, 1H), 8.91–8.54 (m, 2H), 8.15 (dd,  $J = 8.3, 1.7$  Hz, 1H), 7.82 (d,  $J = 8.5$  Hz, 1H), 7.74 (d,  $J = 8.1$  Hz, 1H), 7.59 (d,  $J = 8.9$  Hz, 1H), 7.55–7.40 (m, 4H), 7.33 (ddd,  $J = 8.0, 6.8, 1.2$  Hz, 1H), 7.04 (d,  $J = 8.9$  Hz, 1H), 3.23–2.97 (m, 2H), 2.92–2.74 (m, 2H), 2.41–2.14 (m, 2H), 2.12–1.97 (m, 2H), 1.40 (s, 3H).

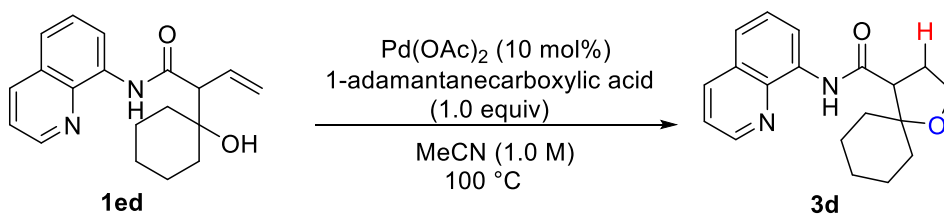

***N*-(quinolin-8-yl)-1-oxaspiro[4.5]decane-4-carboxamide (3d):** The reaction was carried out according to General Procedure C. The product was purified by preparative TLC (3:1 hexanes:EtOAc) to afford 30.9 mg (99%) of **3c** as a colorless oil.  $^1\text{H NMR}$  (600 MHz,  $\text{CDCl}_3$ )  $\delta$  9.94 (s, 1H), 8.85 (dd,  $J = 4.2, 1.7$  Hz, 1H), 8.80 (dd,  $J = 7.3, 1.6$  Hz, 1H), 8.19 (dd,  $J = 8.3, 1.7$  Hz, 1H), 7.58–7.52 (m, 2H), 7.49 (dd,  $J = 8.2, 4.2$  Hz, 1H), 4.18 (td,  $J = 8.6, 5.0$  Hz, 1H), 3.97 (ddd,  $J = 8.6, 8.0, 7.1$  Hz, 1H), 2.92 (dd,  $J = 8.5, 7.1$  Hz, 1H), 2.60 (ddt,  $J = 12.6, 8.5, 7.1$  Hz, 1H), 2.31 (dtd,  $J = 13.0, 8.2, 4.9$  Hz, 1H), 1.86–1.80 (m, 2H), 1.80–1.68 (m, 2H), 1.62 (dddd,  $J = 15.1, 12.8, 8.3, 3.5$  Hz, 3H), 1.56–1.51 (m, 1H), 1.43–1.37 (m, 1H), 1.20 (tdd,  $J = 15.7, 7.1, 3.8$  Hz, 1H);  $^{13}\text{C NMR}$  (150 MHz,  $\text{CDCl}_3$ )  $\delta$  170.8, 148.5, 138.6, 136.5, 134.6, 128.1, 127.5, 121.8, 121.7, 116.6, 83.8, 65.3, 56.9, 37.1, 31.9, 29.3, 25.6, 23.3, 22.5; **HRMS** (ESI-TOF) Calcd for  $\text{C}_{19}\text{H}_{23}\text{N}_2\text{O}_2^+$  [ $\text{M}+\text{H}$ ] 311.1760, found 311.1763.

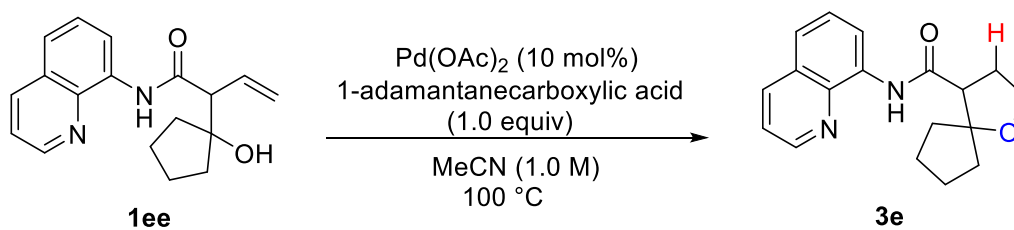

***N*-(quinolin-8-yl)-1-oxaspiro[4.4]nonane-4-carboxamide (3e):** The reaction was carried out according to General Procedure C. The product was purified by preparative TLC (3:1 hexanes:EtOAc) to afford 29.1 mg (99%) of **3d** as a colorless oil.  $^1\text{H NMR}$  (600 MHz,  $\text{CDCl}_3$ )  $\delta$  10.05 (s, 1H), 8.83 (dd,  $J = 4.2, 1.7$  Hz, 1H), 8.77 (dd,  $J = 7.4, 1.6$  Hz, 1H), 8.16 (dd,  $J = 8.2, 1.7$  Hz, 1H), 7.55–7.49 (m, 2H), 7.45 (dd,  $J = 8.2, 4.2$  Hz, 1H), 4.18 (td,  $J = 8.7, 5.4$  Hz, 1H), 3.94 (td,  $J = 8.6, 6.3$  Hz, 1H), 3.07 (dd,  $J = 8.5, 5.7$  Hz, 1H), 2.51 (dddd,  $J = 12.8, 8.7, 6.3, 5.7$  Hz, 1H), 2.35 (dtd,  $J = 12.8, 8.5, 5.4$  Hz, 1H), 1.98–1.92 (m, 1H), 1.87 (tdd,  $J = 9.0, 7.2, 3.4$  Hz, 1H), 1.84–1.73 (m, 4H), 1.67–1.59 (m, 2H);  $^{13}\text{C NMR}$  (150 MHz,  $\text{CDCl}_3$ )  $\delta$  171.8, 148.5, 138.7, 136.4, 134.7, 128.1, 127.5, 121.7, 121.7, 116.7, 93.1, 65.2, 54.7, 38.3, 33.7, 30.0, 24.3, 24.0; **HRMS** (ESI-TOF) Calcd for  $\text{C}_{18}\text{H}_{21}\text{N}_2\text{O}_2^+$  [ $\text{M}+\text{H}$ ] 297.1603, found 297.1606.

**Table S2.** Representative unsuccessful substrates <sup>[a]</sup>

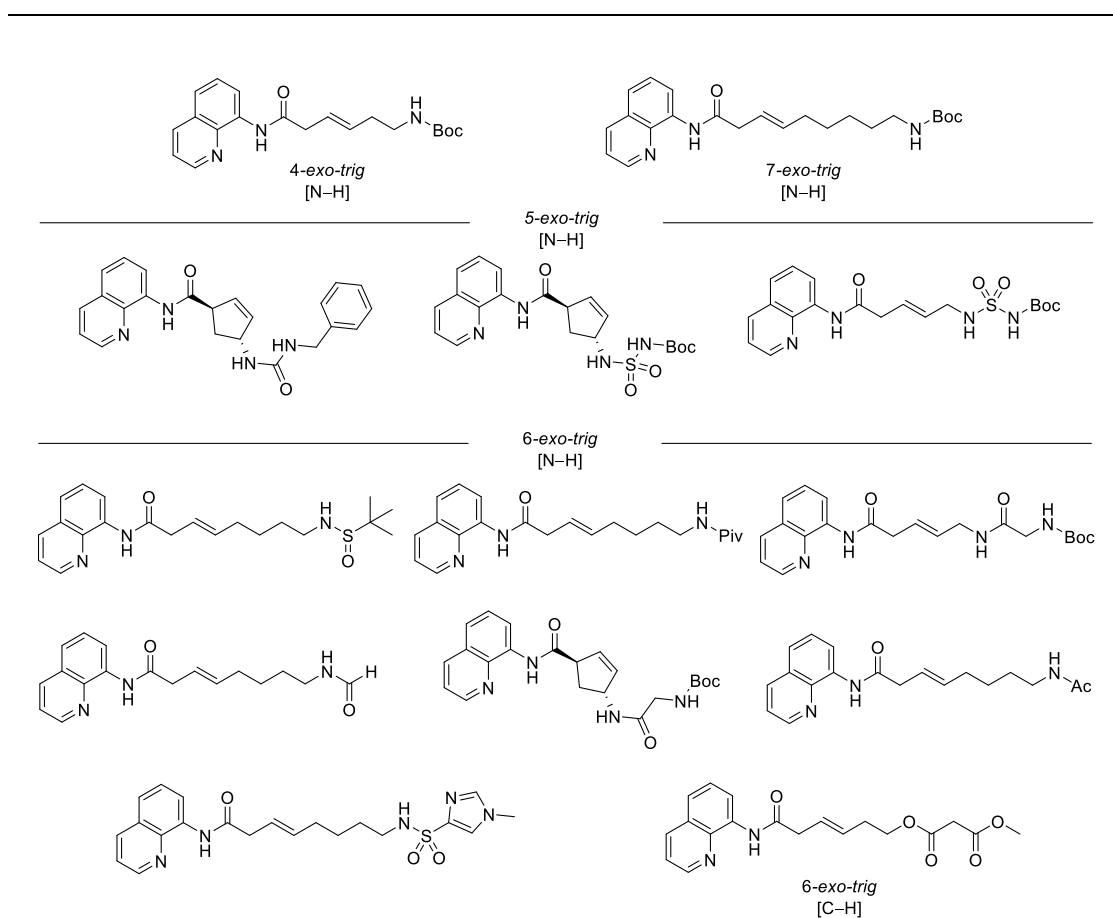

<sup>[a]</sup> Selected example of low-yielding (<10% yield) substrates in intramolecular hydrofunctionalization using General Procedure C

---

## Mechanistic Studies of Intramolecular Hydrofunctionalization

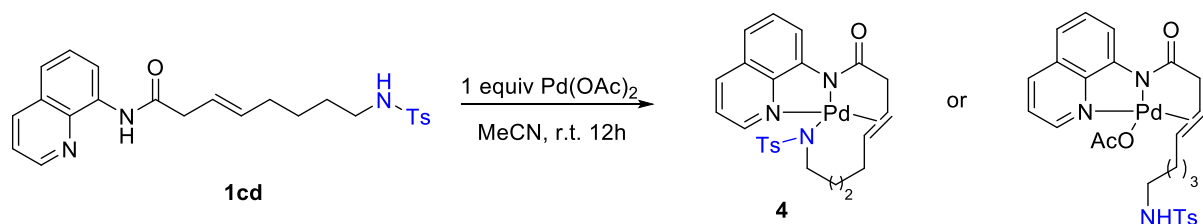

**Procedure for Synthesis of Palladium Complex 4:** Substrate **1cd** (43.8 mg, 0.1 mmol), Pd(OAc)<sub>2</sub> (22.4 mg, 0.1 mmol), and MeCN (1 mL) were added to a 1-dram vial. The reaction mixture was stirred at room temperature for 12 h under air. The reaction mixture was filtered through celite. The filtrate was concentrated in vacuo to give a yellow oil in 95% yield. The structure of the product was assigned based on NMR analysis of the crude reaction mixture. In the solid state, the NTs group is coordinated as the fourth ligand, but in the solution state, we were unable to determine if the NTs group or OAc is bound. <sup>1</sup>H NMR (600 MHz, CDCl<sub>3</sub>) δ 8.79 (dd, *J* = 7.9, 1.1 Hz, 1H), 8.39–8.35 (m, 2H), 7.66–7.62 (m, 2H), 7.53–7.47 (m, 2H), 7.42–7.39 (m, 1H), 7.17 (s, 2H), 6.37 (td, *J* = 8.0, 5.1 Hz, 1H), 5.90 (q, *J* = 7.7 Hz, 1H), 5.48 (t, *J* = 5.9 Hz, 1H), 3.51 (dd, *J* = 17.5, 7.6 Hz, 1H), 3.22–3.16 (m, 1H), 2.94–2.87 (m, 2H), 2.51 (dt, *J* = 14.6, 7.2 Hz, 1H), 2.37–2.36 (m, 1H), 2.34 (s, 3H), 2.04 (s, 3H), 1.78 (q, *J* = 7.5 Hz, 2H), 1.60 (dtd, *J* = 11.3, 6.5, 2.9 Hz, 2H); <sup>13</sup>C NMR (150 MHz, CDCl<sub>3</sub>) δ 180.5, 178.2, 174.6, 146.5, 146.3, 146.0, 143.2, 140.4, 137.1, 130.1, 129.7, 127.1, 123.0, 121.0, 120.7, 117.4, 92.0, 42.7, 37.0, 30.7, 28.8, 25.5, 23.8, 21.5. **X-ray** (single-crystal) Yellow block crystals of X-ray diffraction quality were obtained by vapor diffusion of hexanes into a saturated solution of palladium complex in dichloromethane (CCDC 1995204).<sup>[17]</sup>

## X-RAY CRYSTALLOGRAPHY

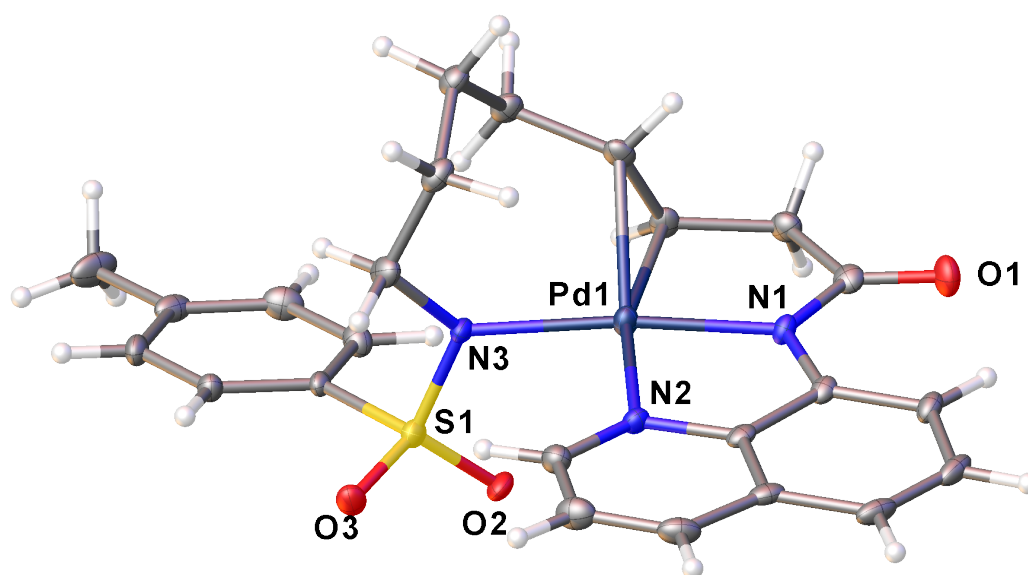

**Table S3.** Crystal data and structure refinement for complex **4**.

|                                   |                                                                    |                 |
|-----------------------------------|--------------------------------------------------------------------|-----------------|
| Identification code               | X-1-260-2                                                          |                 |
| Empirical formula                 | C <sub>24</sub> H <sub>25</sub> N <sub>3</sub> O <sub>3</sub> Pd S |                 |
| Formula weight                    | 541.93                                                             |                 |
| Temperature                       | 100.0 K                                                            |                 |
| Wavelength                        | 0.71073 Å                                                          |                 |
| Crystal system                    | Triclinic                                                          |                 |
| Space group                       | P-1                                                                |                 |
| Unit cell dimensions              | a = 8.2960(9) Å                                                    | α = 111.695(3)° |
|                                   | b = 11.0174(14) Å                                                  | β = 91.745(3)°  |
|                                   | c = 12.5614(12) Å                                                  | γ = 93.375(4)°  |
| Volume                            | 1063.2(2) Å <sup>3</sup>                                           |                 |
| Z                                 | 2                                                                  |                 |
| Density (calculated)              | 1.693 Mg/m <sup>3</sup>                                            |                 |
| Absorption coefficient            | 1.004 mm <sup>-1</sup>                                             |                 |
| F(000)                            | 552                                                                |                 |
| Crystal size                      | 0.28 x 0.1 x 0.05 mm <sup>3</sup>                                  |                 |
| Theta range for data collection   | 1.748 to 27.492°                                                   |                 |
| Index ranges                      | -10 ≤ h ≤ 10, -9 ≤ k ≤ 14, -16 ≤ l ≤ 16                            |                 |
| Reflections collected             | 11304                                                              |                 |
| Independent reflections           | 4882 [R(int) = 0.0238]                                             |                 |
| Completeness to theta = 25.242°   | 99.9 %                                                             |                 |
| Absorption correction             | Semi-empirical from equivalents                                    |                 |
| Max. and min. transmission        | 0.7456 and 0.7048                                                  |                 |
| Refinement method                 | Full-matrix least-squares on F <sup>2</sup>                        |                 |
| Data / restraints / parameters    | 4882 / 0 / 290                                                     |                 |
| Goodness-of-fit on F <sup>2</sup> | 1.081                                                              |                 |
| Final R indices [I > 2σ(I)]       | R1 = 0.0374, wR2 = 0.0981                                          |                 |
| R indices (all data)              | R1 = 0.0449, wR2 = 0.1020                                          |                 |
| Extinction coefficient            | n/a                                                                |                 |
| Largest diff. peak and hole       | 0.829 and -0.525 e.Å <sup>-3</sup>                                 |                 |

**Table S4.** Atomic coordinates ( $\times 10^4$ ) and equivalent isotropic displacement parameters ( $\text{\AA}^2 \times 10^3$ ) for **Pd-1cd**.  $U(\text{eq})$  is defined as one third of the trace of the orthogonalized  $U_{ij}$  tensor.

|       | x       | y        | z        | $U(\text{eq})$ |
|-------|---------|----------|----------|----------------|
| Pd(1) | 2513(1) | 3258(1)  | 7184(1)  | 14(1)          |
| S(1)  | 5788(1) | 4933(1)  | 7650(1)  | 16(1)          |
| O(2)  | 5904(3) | 4087(3)  | 8291(2)  | 22(1)          |
| O(3)  | 6916(3) | 4768(3)  | 6761(2)  | 22(1)          |
| N(1)  | 1322(4) | 1667(3)  | 7209(2)  | 15(1)          |
| N(3)  | 3971(3) | 4810(3)  | 7172(2)  | 15(1)          |
| O(1)  | -448(3) | 810(3)   | 8168(2)  | 27(1)          |
| N(2)  | 3312(4) | 1919(3)  | 5695(2)  | 16(1)          |
| C(9)  | 2573(4) | 686(3)   | 5441(3)  | 16(1)          |
| C(6)  | 1148(5) | -1789(4) | 5027(3)  | 24(1)          |
| C(7)  | 815(5)  | -732(3)  | 6039(3)  | 20(1)          |
| C(22) | 7367(4) | 8767(4)  | 9073(3)  | 22(1)          |
| C(18) | 6176(4) | 6580(3)  | 8634(3)  | 15(1)          |
| C(23) | 7046(4) | 7485(3)  | 8304(3)  | 18(1)          |
| C(4)  | 2840(4) | -359(4)  | 4412(3)  | 19(1)          |
| C(8)  | 1521(4) | 508(3)   | 6258(3)  | 16(1)          |
| C(14) | 1021(5) | 6007(4)  | 8057(3)  | 20(1)          |
| C(16) | 1916(5) | 5358(4)  | 5987(3)  | 21(1)          |
| C(2)  | 4518(5) | 1159(4)  | 3887(3)  | 27(1)          |
| C(1)  | 4260(4) | 2145(4)  | 4949(3)  | 20(1)          |
| C(17) | 3671(5) | 5526(4)  | 6403(3)  | 22(1)          |
| C(5)  | 2115(5) | -1620(4) | 4227(3)  | 24(1)          |
| C(12) | 1357(4) | 4169(4)  | 8800(3)  | 18(1)          |
| C(13) | 665(4)  | 4644(4)  | 8040(3)  | 19(1)          |
| C(20) | 5933(5) | 8244(4)  | 10485(3) | 26(1)          |
| C(10) | 376(4)  | 1721(4)  | 8090(3)  | 19(1)          |
| C(21) | 6823(5) | 9155(4)  | 10175(3) | 23(1)          |
| C(19) | 5595(4) | 6953(4)  | 9718(3)  | 21(1)          |
| C(3)  | 3827(5) | -71(4)   | 3626(3)  | 25(1)          |
| C(15) | 811(5)  | 6138(4)  | 6890(3)  | 20(1)          |
| C(11) | 476(5)  | 3069(4)  | 9052(3)  | 21(1)          |
| C(24) | 7198(6) | 10541(4) | 11029(4) | 36(1)          |

**Table S5.** Bond lengths [Å] and angles [°] for **Pd-1cd**.

---

|              |          |
|--------------|----------|
| Pd(1)-N(1)   | 1.972(3) |
| Pd(1)-N(3)   | 2.040(3) |
| Pd(1)-N(2)   | 2.065(3) |
| Pd(1)-C(12)  | 2.185(3) |
| Pd(1)-C(13)  | 2.236(4) |
| S(1)-O(2)    | 1.445(3) |
| S(1)-O(3)    | 1.445(3) |
| S(1)-N(3)    | 1.585(3) |
| S(1)-C(18)   | 1.781(3) |
| N(1)-C(8)    | 1.412(4) |
| N(1)-C(10)   | 1.361(5) |
| N(3)-C(17)   | 1.480(4) |
| O(1)-C(10)   | 1.217(5) |
| N(2)-C(9)    | 1.375(4) |
| N(2)-C(1)    | 1.324(5) |
| C(9)-C(4)    | 1.412(5) |
| C(9)-C(8)    | 1.427(5) |
| C(6)-H(6)    | 0.9500   |
| C(6)-C(7)    | 1.419(5) |
| C(6)-C(5)    | 1.363(6) |
| C(7)-H(7)    | 0.9500   |
| C(7)-C(8)    | 1.379(5) |
| C(22)-H(22)  | 0.9500   |
| C(22)-C(23)  | 1.389(5) |
| C(22)-C(21)  | 1.388(6) |
| C(18)-C(23)  | 1.388(5) |
| C(18)-C(19)  | 1.380(5) |
| C(23)-H(23)  | 0.9500   |
| C(4)-C(5)    | 1.414(5) |
| C(4)-C(3)    | 1.413(6) |
| C(14)-H(14A) | 0.9900   |
| C(14)-H(14B) | 0.9900   |
| C(14)-C(13)  | 1.505(5) |
| C(14)-C(15)  | 1.531(5) |
| C(16)-H(16A) | 0.9900   |
| C(16)-H(16B) | 0.9900   |
| C(16)-C(17)  | 1.509(5) |

|                   |            |
|-------------------|------------|
| C(16)-C(15)       | 1.516(5)   |
| C(2)-H(2)         | 0.9500     |
| C(2)-C(1)         | 1.407(5)   |
| C(2)-C(3)         | 1.357(6)   |
| C(1)-H(1)         | 0.9500     |
| C(17)-H(17A)      | 0.9900     |
| C(17)-H(17B)      | 0.9900     |
| C(5)-H(5)         | 0.9500     |
| C(12)-H(12)       | 1.0000     |
| C(12)-C(13)       | 1.373(5)   |
| C(12)-C(11)       | 1.516(5)   |
| C(13)-H(13)       | 1.0000     |
| C(20)-H(20)       | 0.9500     |
| C(20)-C(21)       | 1.387(6)   |
| C(20)-C(19)       | 1.397(6)   |
| C(10)-C(11)       | 1.525(5)   |
| C(21)-C(24)       | 1.514(5)   |
| C(19)-H(19)       | 0.9500     |
| C(3)-H(3)         | 0.9500     |
| C(15)-H(15A)      | 0.9900     |
| C(15)-H(15B)      | 0.9900     |
| C(11)-H(11A)      | 0.9900     |
| C(11)-H(11B)      | 0.9900     |
| C(24)-H(24A)      | 0.9800     |
| C(24)-H(24B)      | 0.9800     |
| C(24)-H(24C)      | 0.9800     |
|                   |            |
| N(1)-Pd(1)-N(3)   | 173.73(12) |
| N(1)-Pd(1)-N(2)   | 81.49(12)  |
| N(1)-Pd(1)-C(12)  | 82.26(13)  |
| N(1)-Pd(1)-C(13)  | 96.28(13)  |
| N(3)-Pd(1)-N(2)   | 95.61(12)  |
| N(3)-Pd(1)-C(12)  | 100.39(13) |
| N(3)-Pd(1)-C(13)  | 89.10(13)  |
| N(2)-Pd(1)-C(12)  | 163.65(13) |
| N(2)-Pd(1)-C(13)  | 148.56(13) |
| C(12)-Pd(1)-C(13) | 36.17(14)  |
| O(2)-S(1)-O(3)    | 116.66(16) |



|                   |            |
|-------------------|------------|
| O(2)-S(1)-N(3)    | 108.11(15) |
| O(2)-S(1)-C(18)   | 107.77(16) |
| O(3)-S(1)-N(3)    | 111.89(16) |
| O(3)-S(1)-C(18)   | 105.70(16) |
| N(3)-S(1)-C(18)   | 106.11(16) |
| C(8)-N(1)-Pd(1)   | 115.2(2)   |
| C(10)-N(1)-Pd(1)  | 120.9(2)   |
| C(10)-N(1)-C(8)   | 123.9(3)   |
| S(1)-N(3)-Pd(1)   | 117.34(16) |
| C(17)-N(3)-Pd(1)  | 123.8(2)   |
| C(17)-N(3)-S(1)   | 115.1(2)   |
| C(9)-N(2)-Pd(1)   | 111.8(2)   |
| C(1)-N(2)-Pd(1)   | 128.2(3)   |
| C(1)-N(2)-C(9)    | 119.6(3)   |
| N(2)-C(9)-C(4)    | 121.3(3)   |
| N(2)-C(9)-C(8)    | 117.3(3)   |
| C(4)-C(9)-C(8)    | 121.4(3)   |
| C(7)-C(6)-H(6)    | 118.9      |
| C(5)-C(6)-H(6)    | 118.9      |
| C(5)-C(6)-C(7)    | 122.1(4)   |
| C(6)-C(7)-H(7)    | 120.0      |
| C(8)-C(7)-C(6)    | 120.1(4)   |
| C(8)-C(7)-H(7)    | 120.0      |
| C(23)-C(22)-H(22) | 119.7      |
| C(21)-C(22)-H(22) | 119.7      |
| C(21)-C(22)-C(23) | 120.5(3)   |
| C(23)-C(18)-S(1)  | 119.9(3)   |
| C(19)-C(18)-S(1)  | 119.7(3)   |
| C(19)-C(18)-C(23) | 120.3(3)   |
| C(22)-C(23)-H(23) | 120.0      |
| C(18)-C(23)-C(22) | 120.1(3)   |
| C(18)-C(23)-H(23) | 120.0      |
| C(9)-C(4)-C(5)    | 118.7(3)   |
| C(9)-C(4)-C(3)    | 117.3(3)   |
| C(3)-C(4)-C(5)    | 124.0(4)   |
| N(1)-C(8)-C(9)    | 114.1(3)   |
| C(7)-C(8)-N(1)    | 127.8(3)   |
| C(7)-C(8)-C(9)    | 118.2(3)   |

|                     |          |
|---------------------|----------|
| H(14A)-C(14)-H(14B) | 107.5    |
| C(13)-C(14)-H(14A)  | 108.5    |
| C(13)-C(14)-H(14B)  | 108.5    |
| C(13)-C(14)-C(15)   | 115.0(3) |
| C(15)-C(14)-H(14A)  | 108.5    |
| C(15)-C(14)-H(14B)  | 108.5    |
| H(16A)-C(16)-H(16B) | 107.7    |
| C(17)-C(16)-H(16A)  | 108.8    |
| C(17)-C(16)-H(16B)  | 108.8    |
| C(17)-C(16)-C(15)   | 113.9(3) |
| C(15)-C(16)-H(16A)  | 108.8    |
| C(15)-C(16)-H(16B)  | 108.8    |
| C(1)-C(2)-H(2)      | 120.2    |
| C(3)-C(2)-H(2)      | 120.2    |
| C(3)-C(2)-C(1)      | 119.7(4) |
| N(2)-C(1)-C(2)      | 121.7(4) |
| N(2)-C(1)-H(1)      | 119.1    |
| C(2)-C(1)-H(1)      | 119.1    |
| N(3)-C(17)-C(16)    | 111.7(3) |
| N(3)-C(17)-H(17A)   | 109.3    |
| N(3)-C(17)-H(17B)   | 109.3    |
| C(16)-C(17)-H(17A)  | 109.3    |
| C(16)-C(17)-H(17B)  | 109.3    |
| H(17A)-C(17)-H(17B) | 107.9    |
| C(6)-C(5)-C(4)      | 119.5(3) |
| C(6)-C(5)-H(5)      | 120.3    |
| C(4)-C(5)-H(5)      | 120.3    |
| Pd(1)-C(12)-H(12)   | 116.1    |
| C(13)-C(12)-Pd(1)   | 73.9(2)  |
| C(13)-C(12)-H(12)   | 116.1    |
| C(13)-C(12)-C(11)   | 120.0(3) |
| C(11)-C(12)-Pd(1)   | 106.7(2) |
| C(11)-C(12)-H(12)   | 116.1    |
| Pd(1)-C(13)-H(13)   | 113.7    |
| C(14)-C(13)-Pd(1)   | 113.7(2) |
| C(14)-C(13)-H(13)   | 113.7    |
| C(12)-C(13)-Pd(1)   | 69.9(2)  |
| C(12)-C(13)-C(14)   | 124.5(3) |

|                     |          |
|---------------------|----------|
| C(12)-C(13)-H(13)   | 113.7    |
| C(21)-C(20)-H(20)   | 119.3    |
| C(21)-C(20)-C(19)   | 121.4(4) |
| C(19)-C(20)-H(20)   | 119.3    |
| N(1)-C(10)-C(11)    | 113.3(3) |
| O(1)-C(10)-N(1)     | 126.1(3) |
| O(1)-C(10)-C(11)    | 120.6(3) |
| C(22)-C(21)-C(24)   | 121.0(4) |
| C(20)-C(21)-C(22)   | 118.6(3) |
| C(20)-C(21)-C(24)   | 120.4(4) |
| C(18)-C(19)-C(20)   | 119.0(3) |
| C(18)-C(19)-H(19)   | 120.5    |
| C(20)-C(19)-H(19)   | 120.5    |
| C(4)-C(3)-H(3)      | 119.9    |
| C(2)-C(3)-C(4)      | 120.2(4) |
| C(2)-C(3)-H(3)      | 119.9    |
| C(14)-C(15)-H(15A)  | 108.5    |
| C(14)-C(15)-H(15B)  | 108.5    |
| C(16)-C(15)-C(14)   | 115.3(3) |
| C(16)-C(15)-H(15A)  | 108.5    |
| C(16)-C(15)-H(15B)  | 108.5    |
| H(15A)-C(15)-H(15B) | 107.5    |
| C(12)-C(11)-C(10)   | 116.0(3) |
| C(12)-C(11)-H(11A)  | 108.3    |
| C(12)-C(11)-H(11B)  | 108.3    |
| C(10)-C(11)-H(11A)  | 108.3    |
| C(10)-C(11)-H(11B)  | 108.3    |
| H(11A)-C(11)-H(11B) | 107.4    |
| C(21)-C(24)-H(24A)  | 109.5    |
| C(21)-C(24)-H(24B)  | 109.5    |
| C(21)-C(24)-H(24C)  | 109.5    |
| H(24A)-C(24)-H(24B) | 109.5    |
| H(24A)-C(24)-H(24C) | 109.5    |
| H(24B)-C(24)-H(24C) | 109.5    |

---

**Table S6.** Anisotropic displacement parameters ( $\text{\AA}^2 \times 10^3$ ) for **Pd-1d**. The anisotropic displacement factor exponent takes the form:  $-2h^2 a^* U^{11} + \dots + 2hk a^* b^* U^{12}$ .

|       | U <sup>11</sup> | U <sup>22</sup> | U <sup>33</sup> | U <sup>23</sup> | U <sup>13</sup> | U <sup>12</sup> |
|-------|-----------------|-----------------|-----------------|-----------------|-----------------|-----------------|
| Pd(1) | 16(1)           | 11(1)           | 14(1)           | 4(1)            | 3(1)            | 0(1)            |
| S(1)  | 14(1)           | 10(1)           | 22(1)           | 6(1)            | 1(1)            | 0(1)            |
| O(2)  | 20(1)           | 16(1)           | 35(2)           | 16(1)           | -3(1)           | 1(1)            |
| O(3)  | 21(1)           | 16(1)           | 27(1)           | 4(1)            | 9(1)            | 3(1)            |
| N(1)  | 20(2)           | 12(1)           | 14(1)           | 6(1)            | -1(1)           | -1(1)           |
| N(3)  | 14(1)           | 11(1)           | 20(1)           | 7(1)            | -1(1)           | 0(1)            |
| O(1)  | 30(2)           | 26(2)           | 28(2)           | 14(1)           | 7(1)            | -5(1)           |
| N(2)  | 17(1)           | 12(1)           | 17(1)           | 5(1)            | 2(1)            | 3(1)            |
| C(9)  | 16(2)           | 15(2)           | 17(2)           | 7(1)            | -4(1)           | 4(1)            |
| C(6)  | 26(2)           | 12(2)           | 33(2)           | 7(2)            | -13(2)          | 1(2)            |
| C(7)  | 22(2)           | 15(2)           | 25(2)           | 11(2)           | -6(1)           | -2(1)           |
| C(22) | 18(2)           | 16(2)           | 34(2)           | 12(2)           | -1(2)           | -3(1)           |
| C(18) | 12(2)           | 11(2)           | 21(2)           | 7(1)            | -2(1)           | -2(1)           |
| C(23) | 17(2)           | 16(2)           | 21(2)           | 8(1)            | 4(1)            | 1(1)            |
| C(4)  | 19(2)           | 18(2)           | 20(2)           | 5(1)            | -3(1)           | 9(1)            |
| C(8)  | 18(2)           | 14(2)           | 16(2)           | 7(1)            | -5(1)           | 0(1)            |
| C(14) | 24(2)           | 18(2)           | 17(2)           | 5(1)            | 4(1)            | 6(1)            |
| C(16) | 31(2)           | 17(2)           | 17(2)           | 8(1)            | 0(2)            | 4(2)            |
| C(2)  | 27(2)           | 35(2)           | 21(2)           | 13(2)           | 7(2)            | 10(2)           |
| C(1)  | 19(2)           | 20(2)           | 22(2)           | 10(2)           | 4(1)            | 3(1)            |
| C(17) | 23(2)           | 24(2)           | 22(2)           | 14(2)           | 7(1)            | 5(2)            |
| C(5)  | 25(2)           | 15(2)           | 25(2)           | 0(2)            | -7(2)           | 8(2)            |
| C(12) | 22(2)           | 16(2)           | 15(2)           | 2(1)            | 6(1)            | 3(1)            |
| C(13) | 18(2)           | 20(2)           | 17(2)           | 3(1)            | 7(1)            | 4(1)            |
| C(20) | 26(2)           | 32(2)           | 16(2)           | 5(2)            | 1(2)            | 6(2)            |
| C(10) | 20(2)           | 22(2)           | 17(2)           | 11(2)           | -2(1)           | 2(1)            |
| C(21) | 19(2)           | 16(2)           | 27(2)           | 1(2)            | -9(2)           | 2(1)            |
| C(19) | 19(2)           | 25(2)           | 20(2)           | 11(2)           | 0(1)            | -1(2)           |
| C(3)  | 22(2)           | 29(2)           | 20(2)           | 2(2)            | 1(1)            | 11(2)           |
| C(15) | 24(2)           | 18(2)           | 20(2)           | 10(2)           | 2(1)            | 4(2)            |
| C(11) | 21(2)           | 24(2)           | 19(2)           | 9(2)            | 6(1)            | 4(2)            |
| C(24) | 37(2)           | 16(2)           | 39(2)           | -5(2)           | -14(2)          | 5(2)            |

## Computational Details

All DFT calculations were carried out using the *Gaussian 16* program<sup>[8]</sup> on Pitt CRC and XSEDE<sup>[9]</sup> supercomputers. Geometries of all stationary points were fully optimized using the M06 functional<sup>[10]</sup> with the SDD<sup>[11]</sup> effective core potential basis set for Pd and the 6-31G(d) basis set<sup>[12]</sup> for other atoms. Vibrational frequency calculations at the same level of theory of the geometry optimization were performed to confirm if each structure is a local minimum or a transition state. Single-point energy calculations were carried out using the SDD basis set for Pd and 6-311+G(d,p) basis set for other atoms. Solvation energy corrections in acetonitrile solvent were calculated using the SMD solvation model<sup>[13]</sup> in the single-point energy calculations. The Gibbs free energies were calculated at the standard state (1 mol/L, 298K).<sup>[14]</sup>

## Computed Energy Profiles

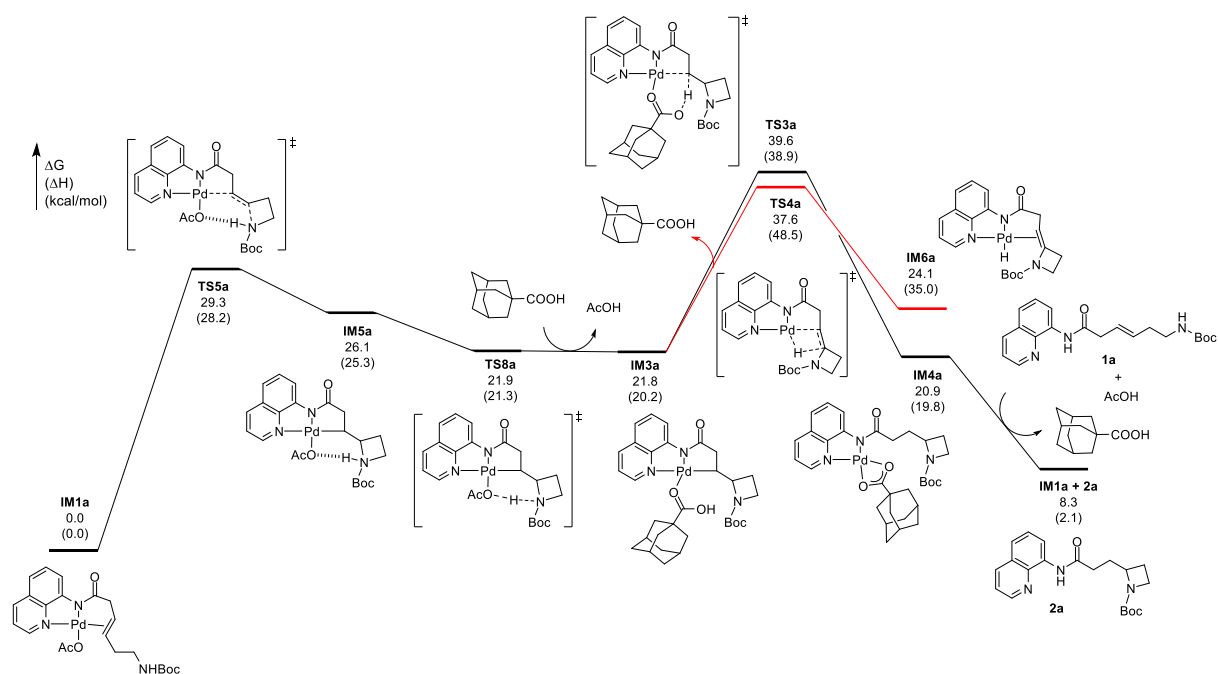

**Figure S1.** Computed energy profile (kcal/mol) for the 4-*exo-trig* cyclization of **1a**.

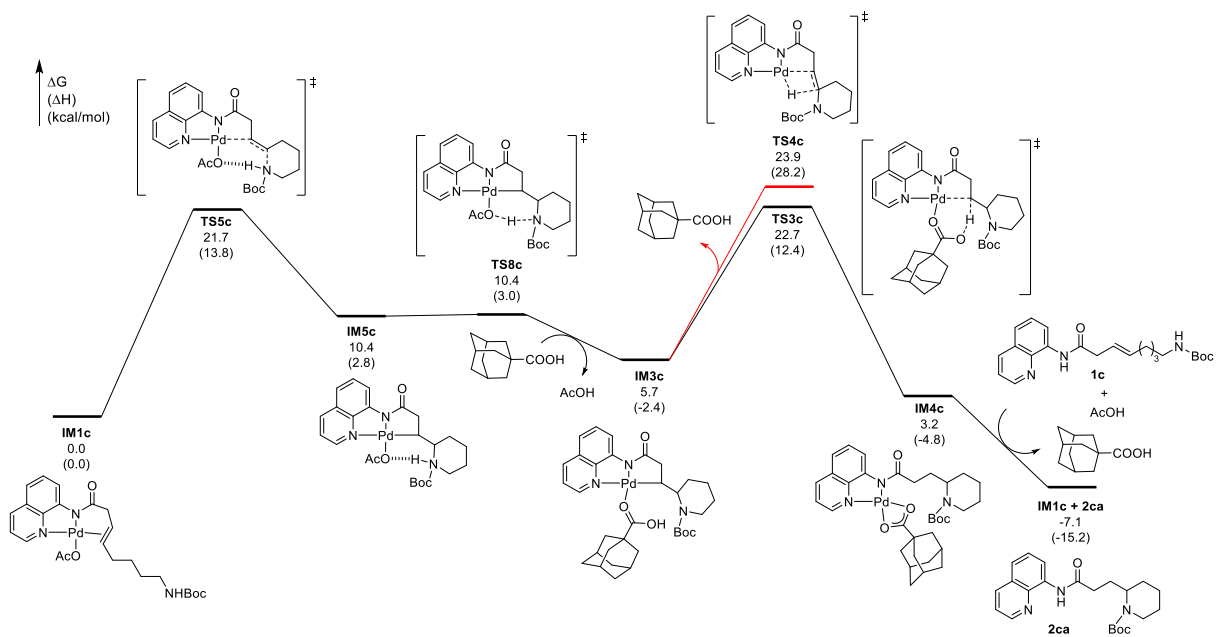

**Figure S2.** Computed energy profile (kcal/mol) for the 6-*exo-trig* cyclization of **1c**.

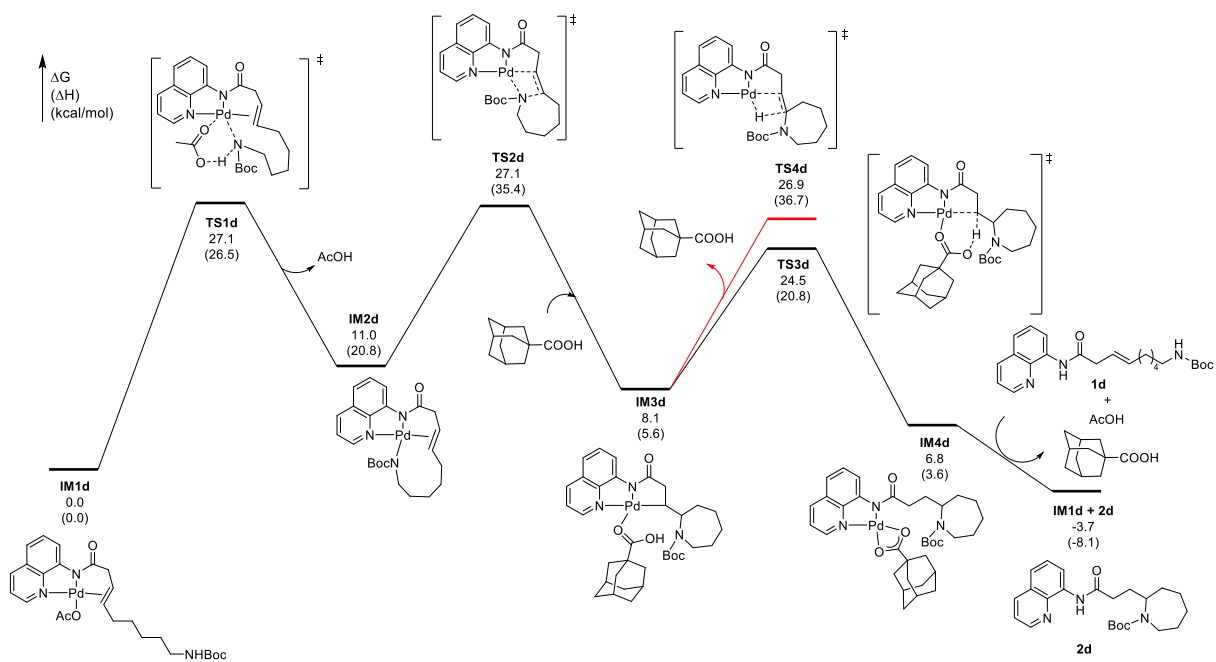

**Figure S3.** Computed energy profile (kcal/mol) for the 7-*exo-trig* cyclization of **1d**.

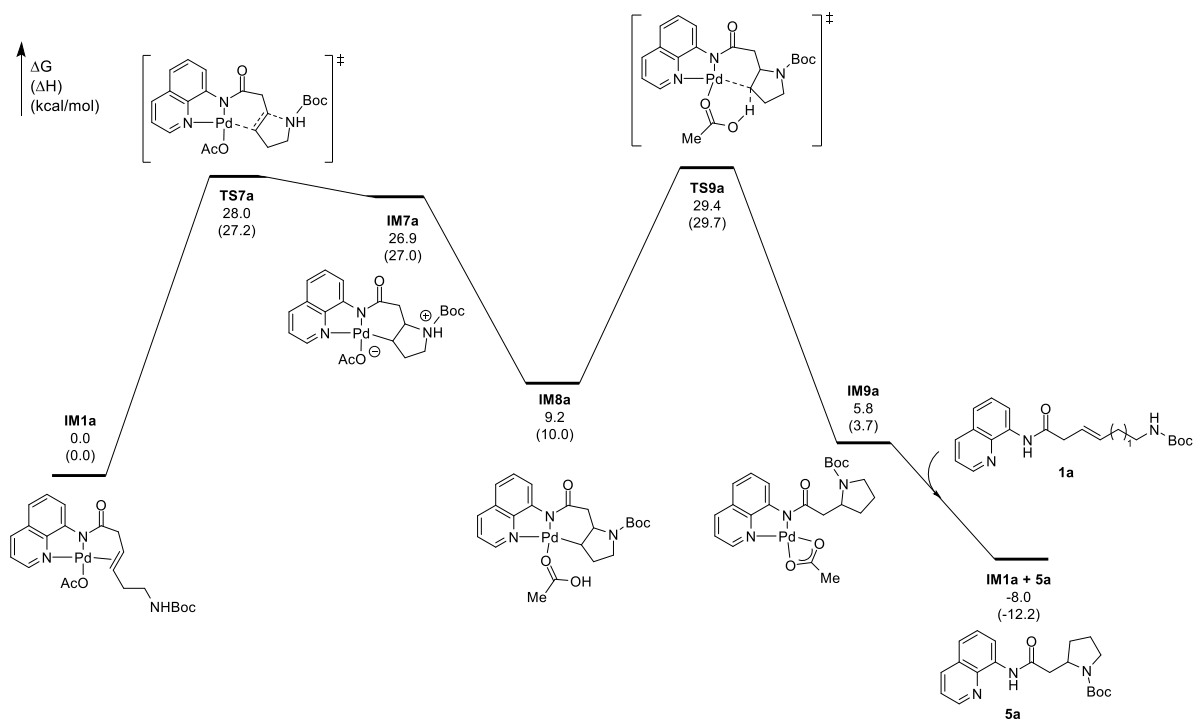

**Figure S4.** Computed energy profile (kcal/mol) for the 5-endo-trig cyclization of **1a**.

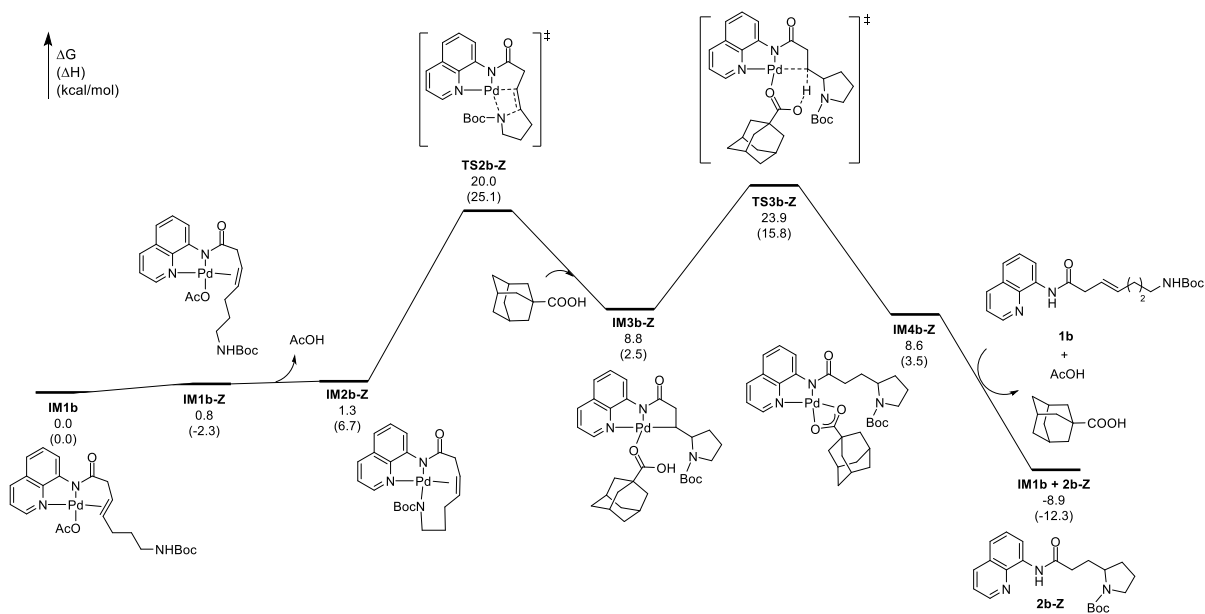

**Figure S5.** Computed energy profile (kcal/mol) for the 5-exo-trig cyclization for Z-isomer of **1b**.

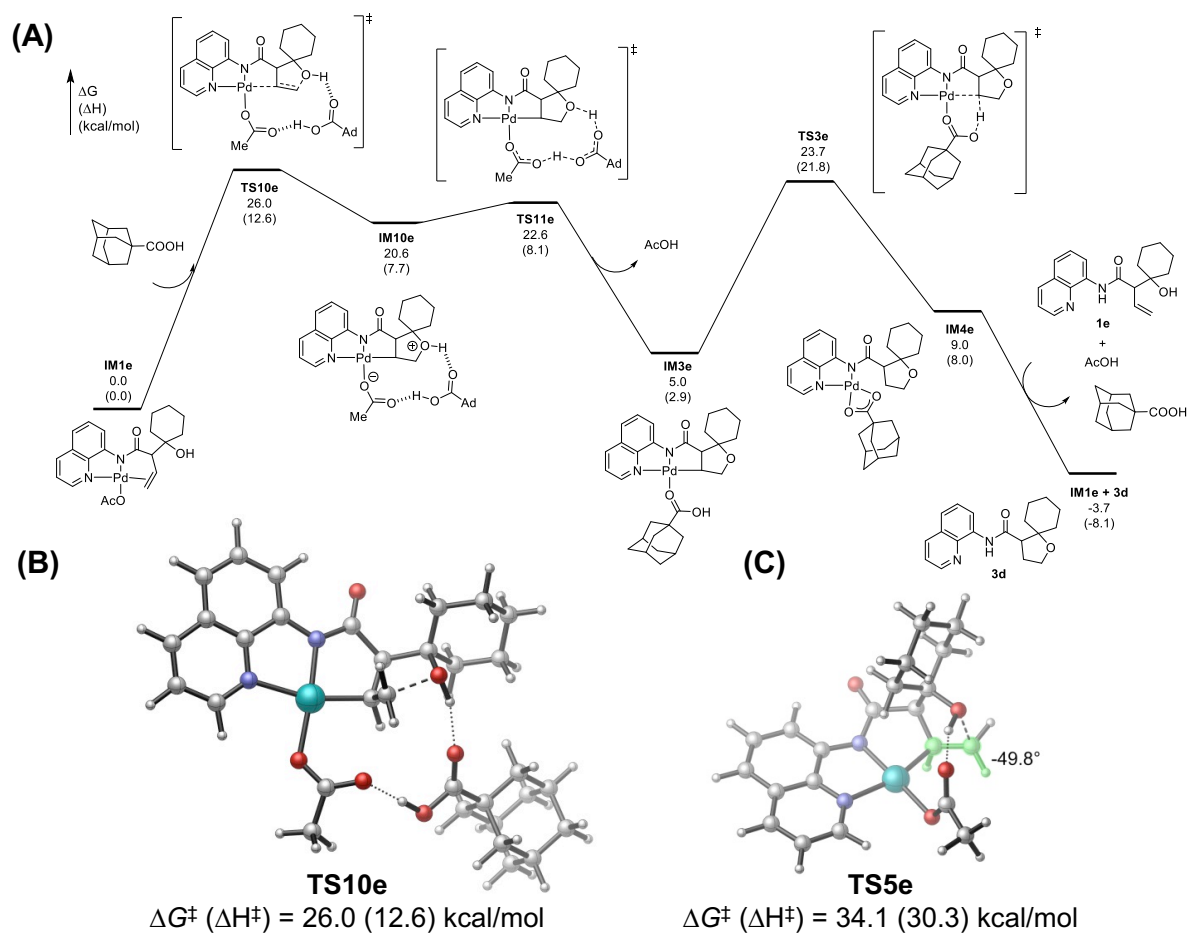

**Figure S6.** (A) Computed energy profile (kcal/mol) and optimized structures of (B) the *anti*-nucleopalladation transition state **TS10e** and (C) the *syn*-nucleopalladation transition state **TS5e** for the 5-*endo-trig* cyclization of **1e** to form oxaspiro compound **3d**. The nucleopalladation transition state with the deprotonated O-nucleophile is 4.6 kcal/mol higher in energy than **TS10e**. The *syn*-nucleopalladation transition state **TS5e** is disfavored because of the steric repulsions between the spiro center and the Pd and the geometrical constrain of the spiro center that is attached to the  $\alpha$ -carbon of the amide. Due to these constrains, the oxygen nucleophile cannot be placed *syn*-periplanar with the Pd, leading to large distortion of this TS.



**Correlation of the stability of the palladacycle intermediate **3** and ring strain energy of the N-heterocycle**

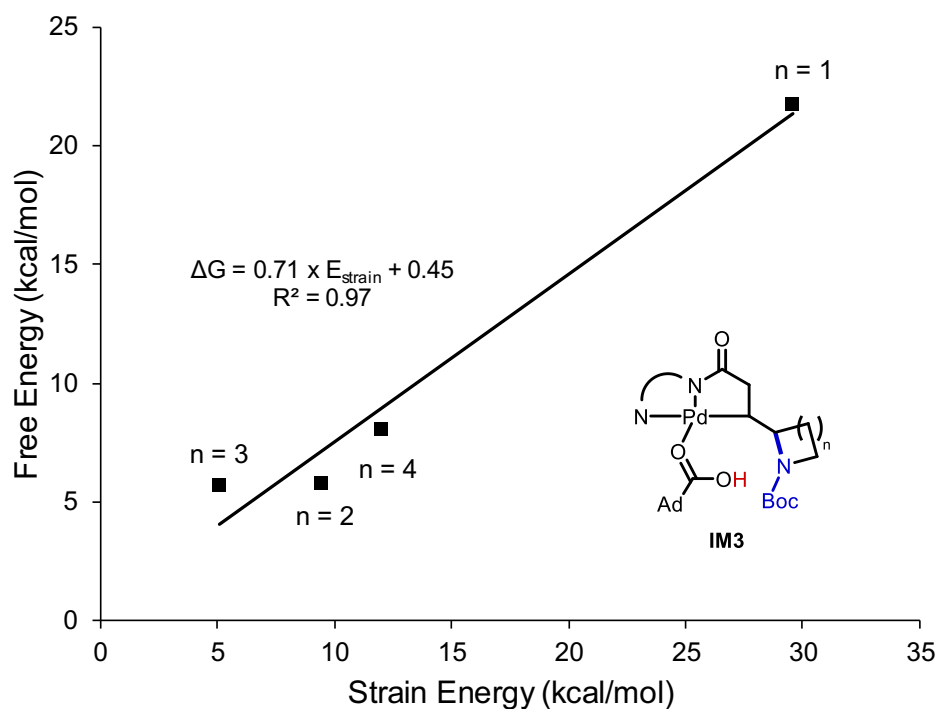

**Figure S7.** Correlation between Gibbs free energies of cyclic intermediates **IM3** relative to **IM1** and ring strain energies of the N-heterocycles.<sup>[15]</sup>

The ring strain energy of heterocycles were taken from ref. 15.

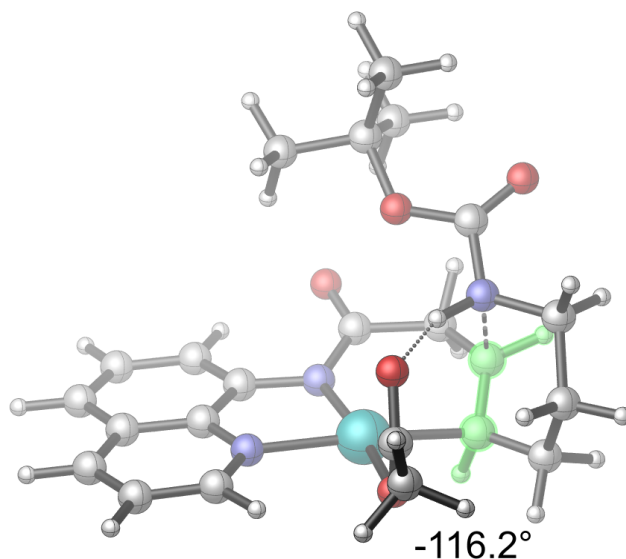

**TS7b-syn**

$$\Delta G^\ddagger (\Delta H^\ddagger) = 33.4 (25.8) \text{ kcal/mol}$$

**Figure S8.** Optimized transition state for the formation of *6-endo-trig* product via the *syn*-nucleopalladation, **TS7b-syn**. The calculated energies are relative to **IM1b**. This transition state is 8.1 kcal/mol higher in energy than the anti-nucleopalladation TS giving *6-endo-trig* product, **TS7b**. **TS7b-syn** is disfavored because the N-nucleophile and the Pd cannot achieve the *syn*-periplanar conformation.

## References

- [1] M. Szabo, K. C. Herenbrink, A. Christopoulos, J. R. Lane, B. Capuano, *J. Med. Chem.*, 2014, **57**, 4924–4939.
- [2] J. Jimenez, A. Landa, A. Lizarraga, M. Maestro, A. Mielgo, M. Oiarbide, I. Velilla, C. Palomo, *J. Org. Chem.*, 2012, **77**, 747–753.
- [3] Kawamata, Y.; Hashimoto, T.; Maruoka, K. “A Chiral Electrophilic Selenium Catalyst for Highly Enantioselective Oxidative Cyclization.” *J. Am. Chem. Soc.*, 2016, **138**, 5206–5209.
- [4] J. A. Gurak, Jr., K. S. Yang, Z. Liu, K. M. Engle, *J. Am. Chem. Soc.*, 2016, **138**, 5805–5808.
- [5] T. Xiong, Y. Li, L. Mao, Q. Zhang, *Chem. Comm.*, 2012, **48**, 2246–2248.
- [6] R. Devi, J. Das, B. Sarma, S. K. Das, *Org. Biomol. Chem.*, 2018, **16**, 5846–5858.
- [7] S. Nicolai, P. Swallow, J. Waser, *Tetrahedron*, 2015, **71**, 5959–5964.

- [8] M. J. Frisch, G. W. Trucks, H. B. Schlegel, G. E. Scuseria, M. A. Robb, J. R. Cheeseman, G. Scalmani, V. Barone, G. A. Petersson, H. Nakatsuji, X. Li, M. Caricato, A. V. Marenich, J. Bloino, B. G. Janesko, R. Gomperts, B. Mennucci, H. P. Hratchian, J. V. Ortiz, A. F. Izmaylov, J. L. Sonnenberg, Williams, F. Ding, F. Lipparini, F. Egidi, J. Goings, B. Peng, A. Petrone, T. Henderson, D. Ranasinghe, V. G. Zakrzewski, J. Gao, N. Rega, G. Zheng, W. Liang, M. Hada, M. Ehara, K. Toyota, R. Fukuda, J. Hasegawa, M. Ishida, T. Nakajima, Y. Honda, O. Kitao, H. Nakai, T. Vreven, K. Throssell, J. A. Montgomery, Jr., J. E. Peralta, F. Ogliaro, M. J. Bearpark, J. J. Heyd, E. N. Brothers, K. N. Kudin, V. N. Staroverov, T. A. Keith, R. Kobayashi, J. Normand, K. Raghavachari, A. P. Rendell, J. C. Burant, S. S. Iyengar, J. Tomasi, M. Cossi, J. M. Millam, M. Klene, C. Adamo, R. Cammi, J. W. Ochterski, R. L. Martin, K. Morokuma, O. Farkas, J. B. Foresman, D. J. Fox, Gaussian 16 Rev. B.01, Wallingford, CT, **2016**.
- [9] J. Towns, T. Cockerill, M. Dahan, I. Foster, K. Gaither, A. Grimshaw, V. Hazlewood, S. Lathrop, D. Lifka, G. D. Peterson, R. Roskies, J. R. Scott, N. Wilkins-Diehr, *Comput. Sci. Eng.*, 2014, **16**, 62–74.
- [10] Y. Zhao, D. G. Truhlar, *Theor. Chem. Acc.*, 2008, **120**, 215–241.
- [11] D. Andrae, U. Häußermann, M. Dolg, H. Stoll, H. Preuß, *Theor. Chem. Acc.*, 1990, **77**, 123–141.
- [12] a) R. Ditchfield, W. J. Hehre, J. A. Pople, *J. Chem. Phys.*, 1971, **54**, 724–728; b) P. C. Hariharan, J. A. Pople, *Theor. Chem. Acc.*, 1973, **28**, 213–222.
- [13] A. V. Marenich, C. J. Cramer, D. G. Truhlar, *J. Phys. Chem. B*, 2009, **113**, 6378–6396.
- [14] R. F. Ribeiro, A. V. Marenich, C. J. Cramer, D. G. Truhlar, *J. Phys. Chem. B*, 2011, **115**, 14556–14562.
- [15] T. Dudev, C. Lim, *J. Am. Chem. Soc.*, 1998, **120**, 4450–4458.
- [16] K. Yang, J. A. Gurak, Jr., Z. Liu, K. M. Engle, *J. Am. Chem. Soc.* **2016**, *138*, 14705–14712.
- [17] CCDC 1995204 (complex **4**) contains the supplementary crystallographic data for this paper. These data can be obtained free of charge from The Cambridge Crystallographic Data Centre via [www.ccdc.cam.ac.uk/data\\_request/cif](http://www.ccdc.cam.ac.uk/data_request/cif).

# NMR Spectra

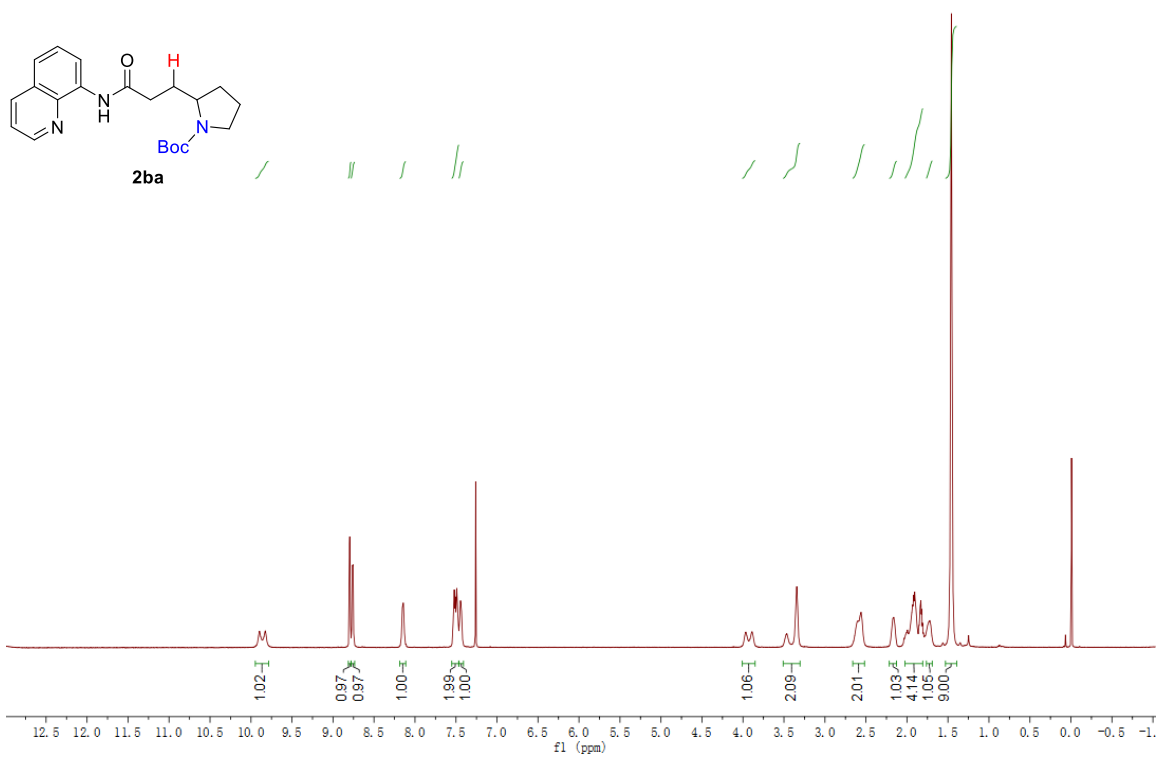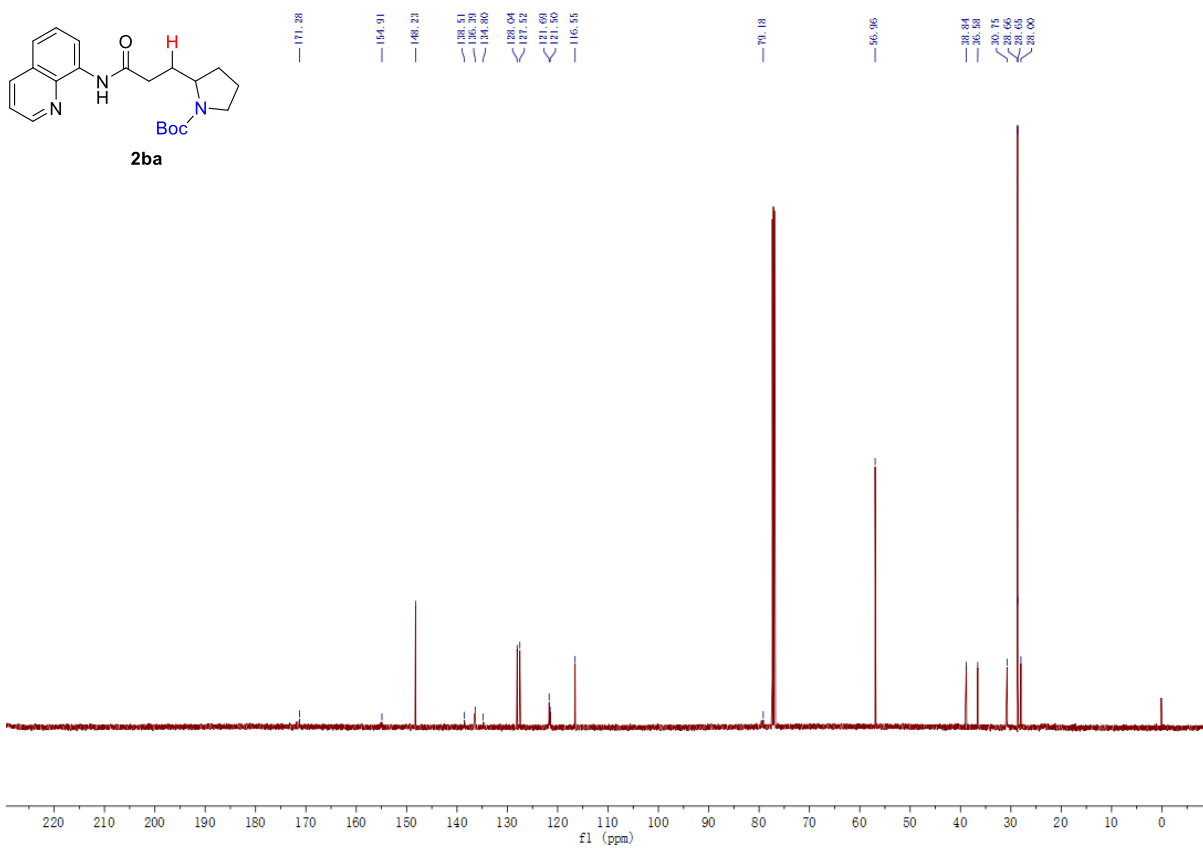

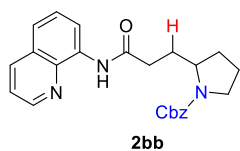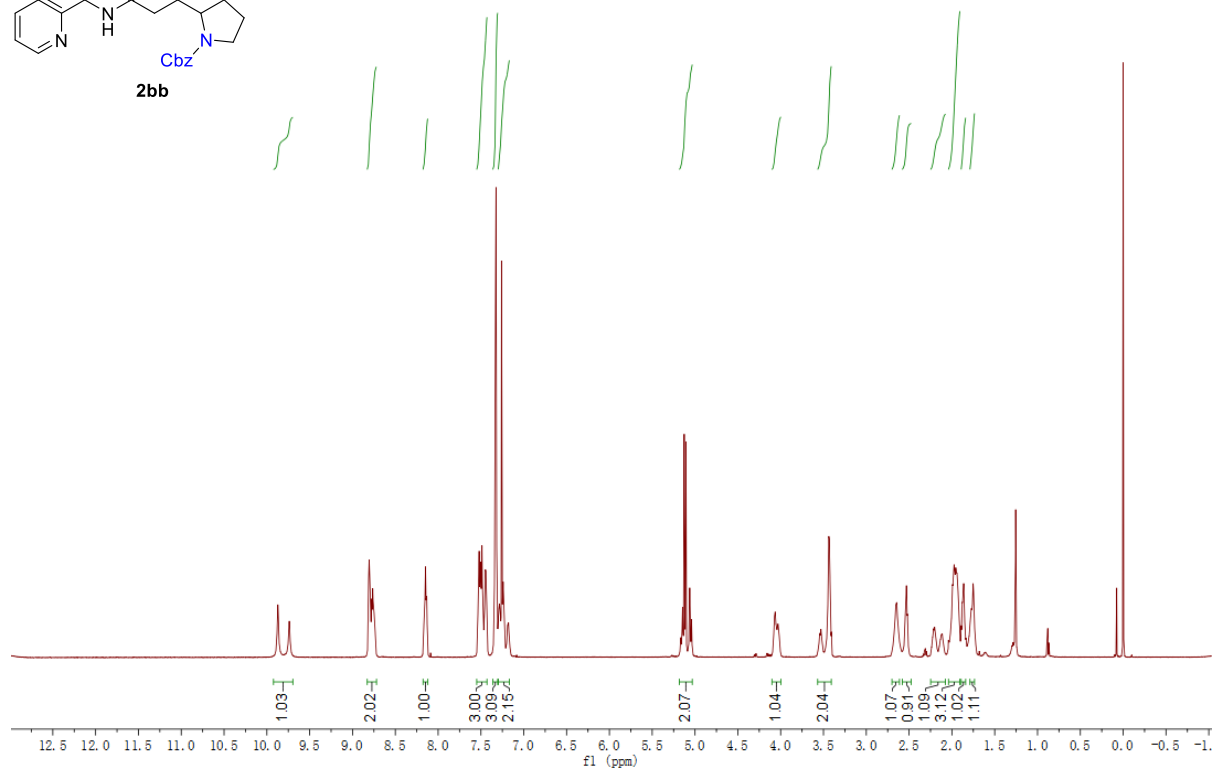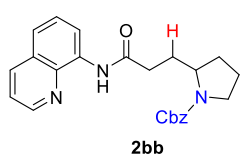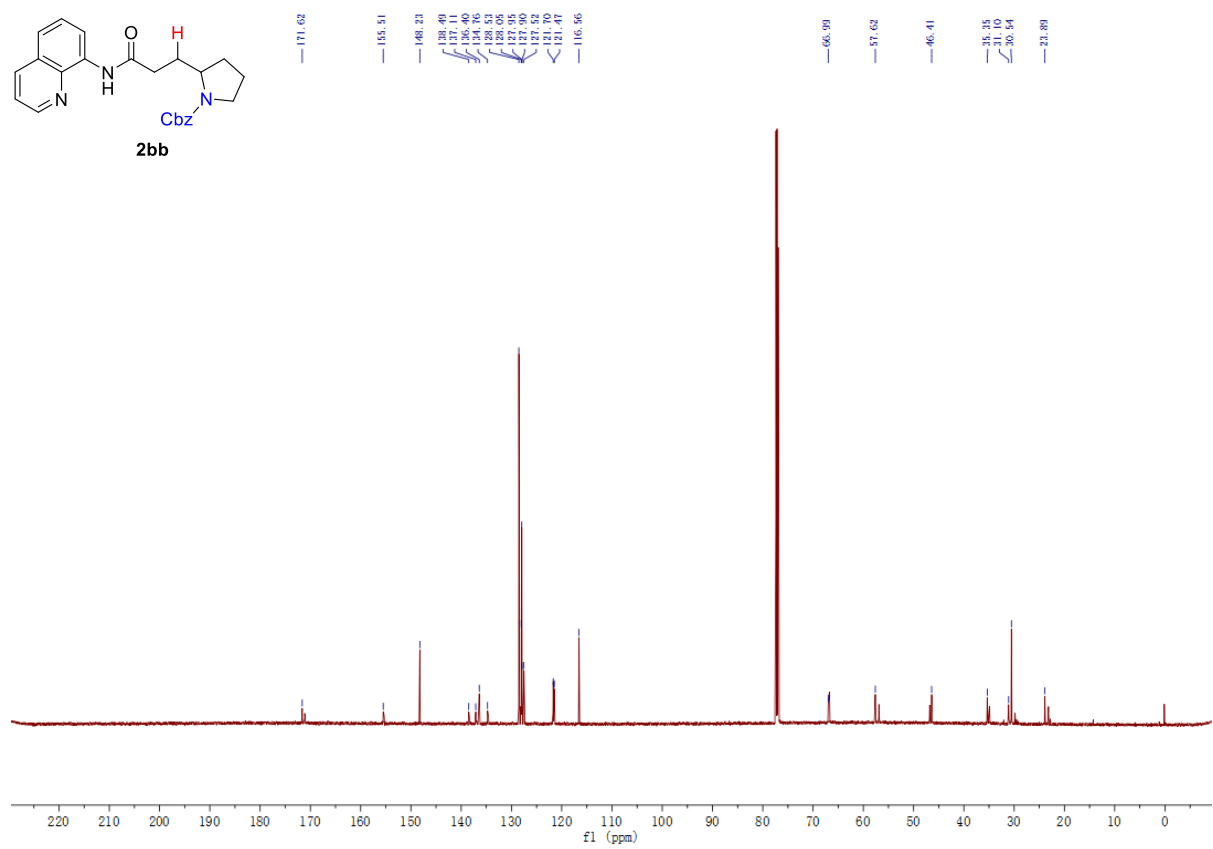

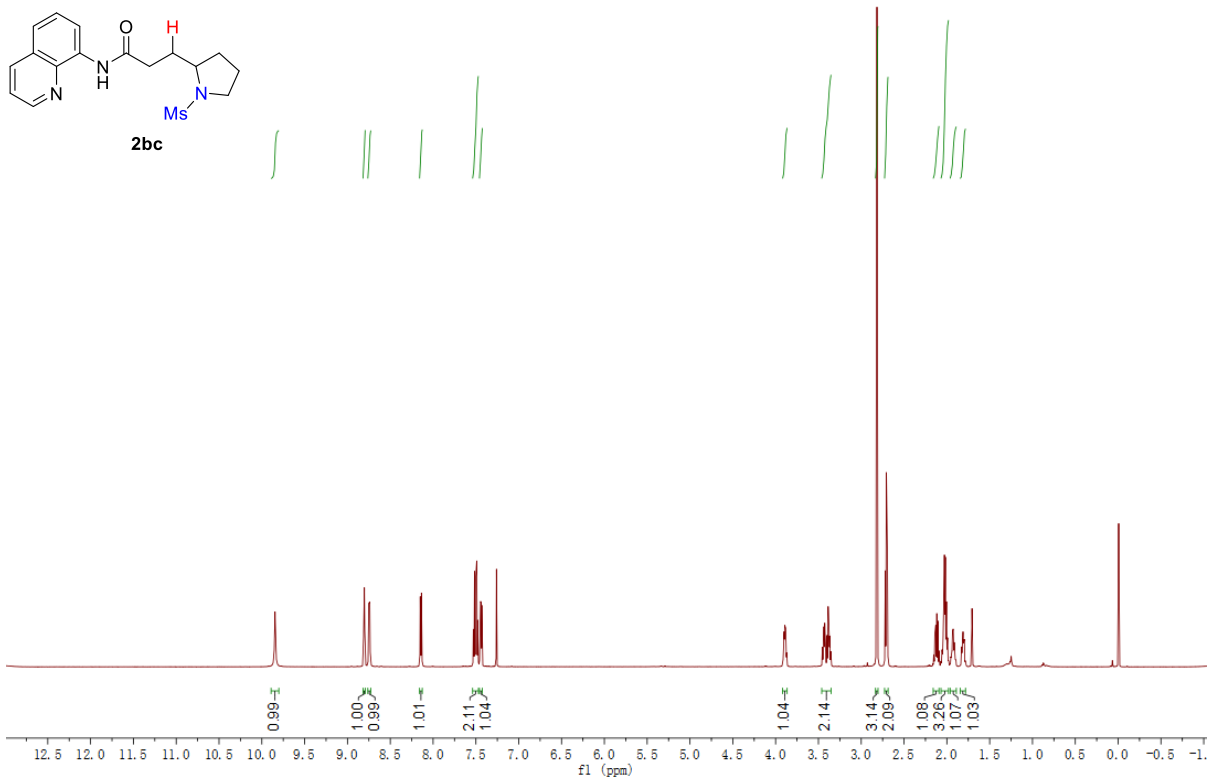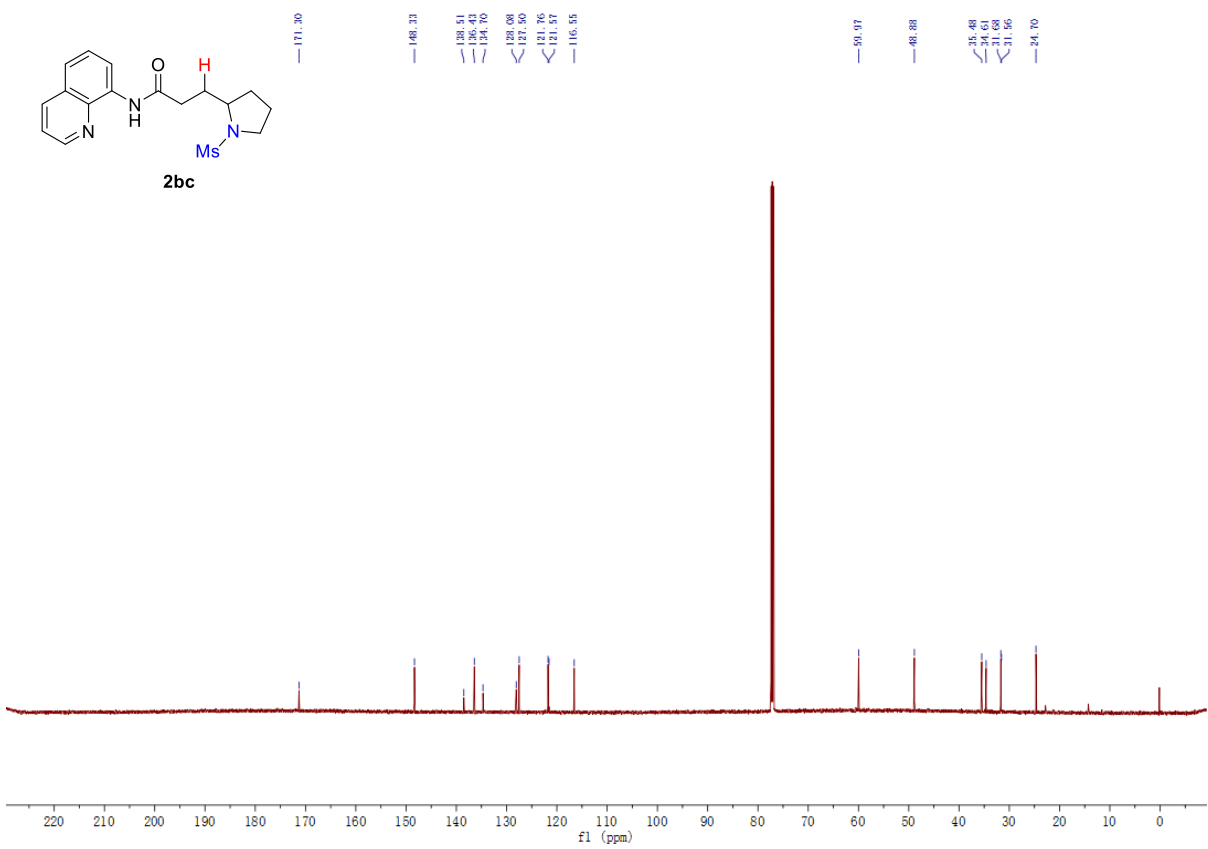

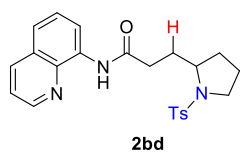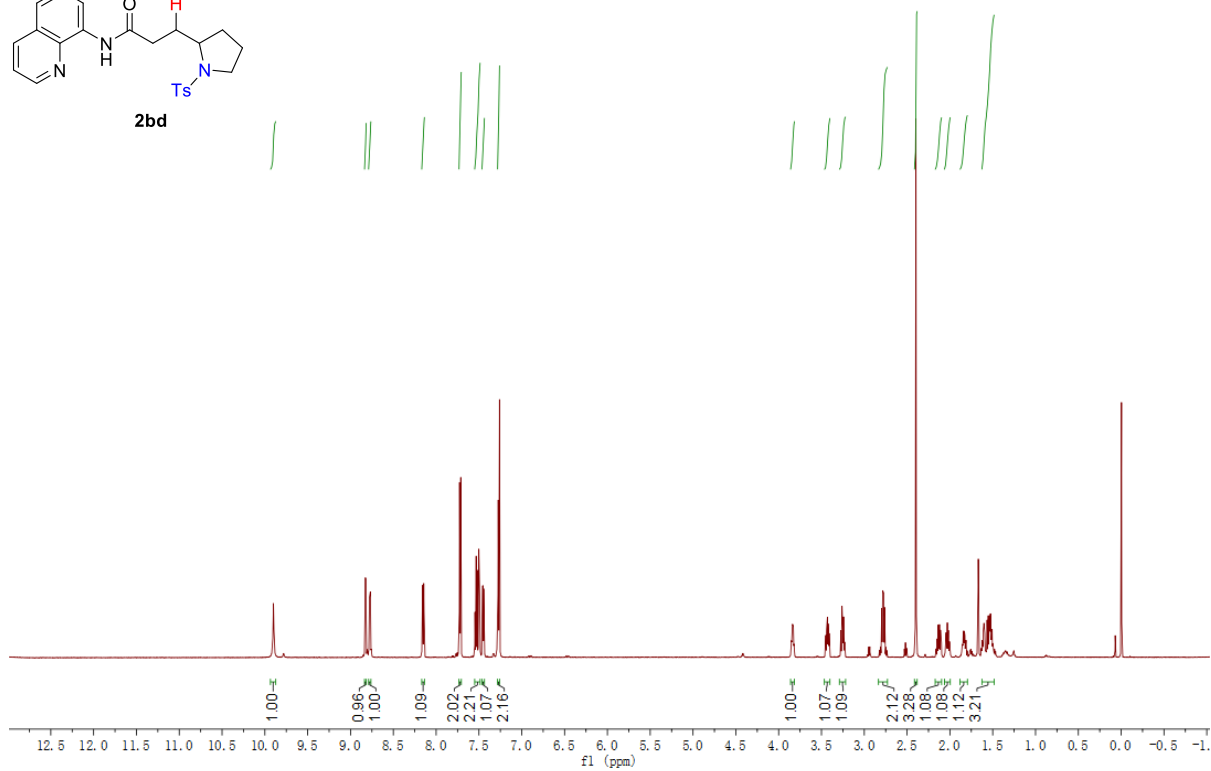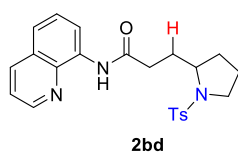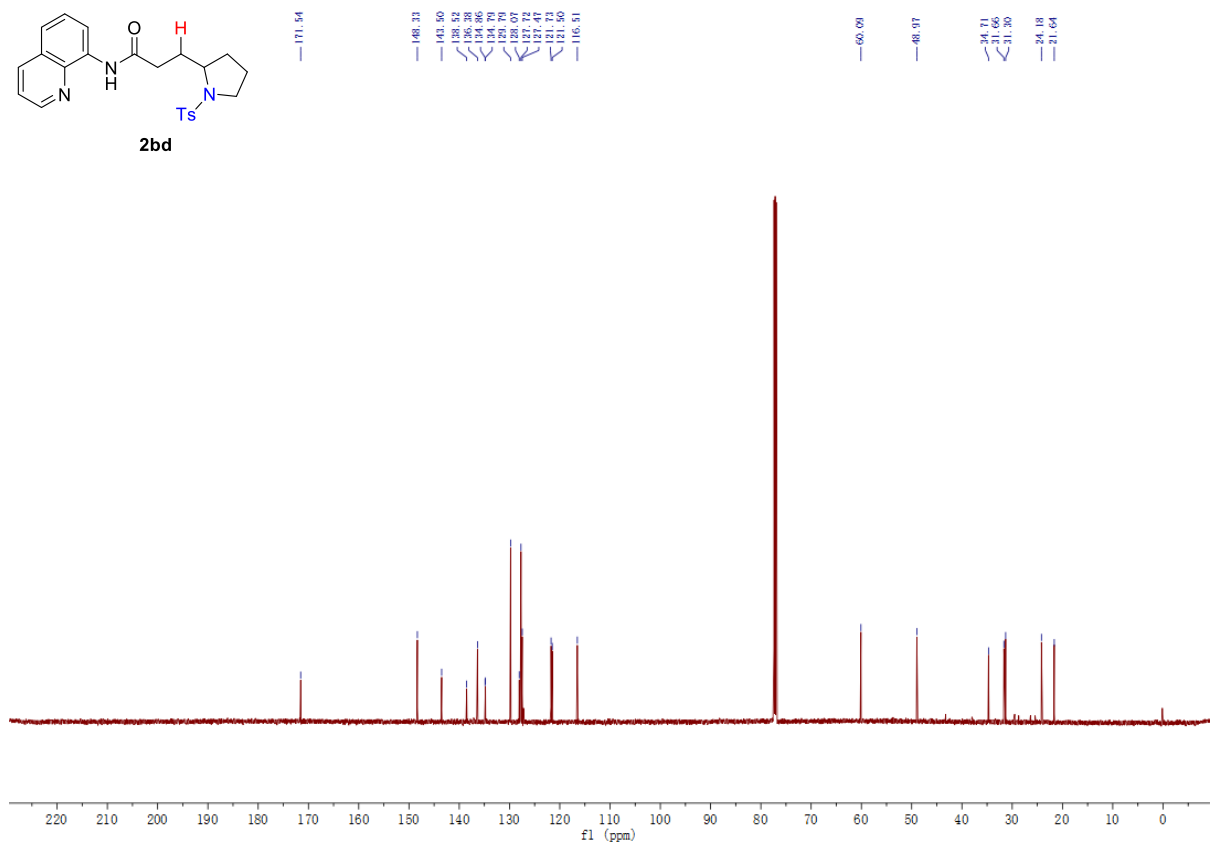

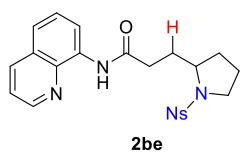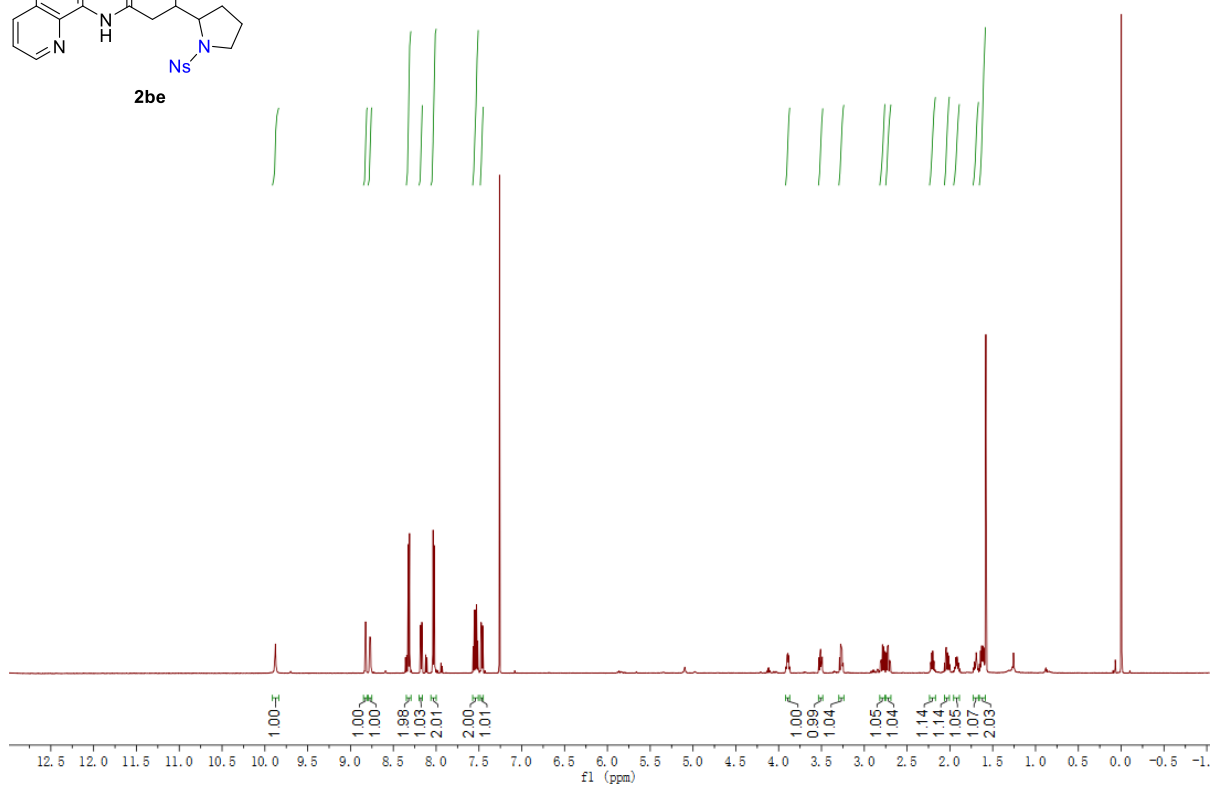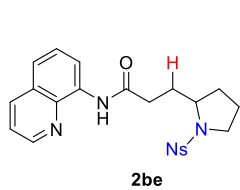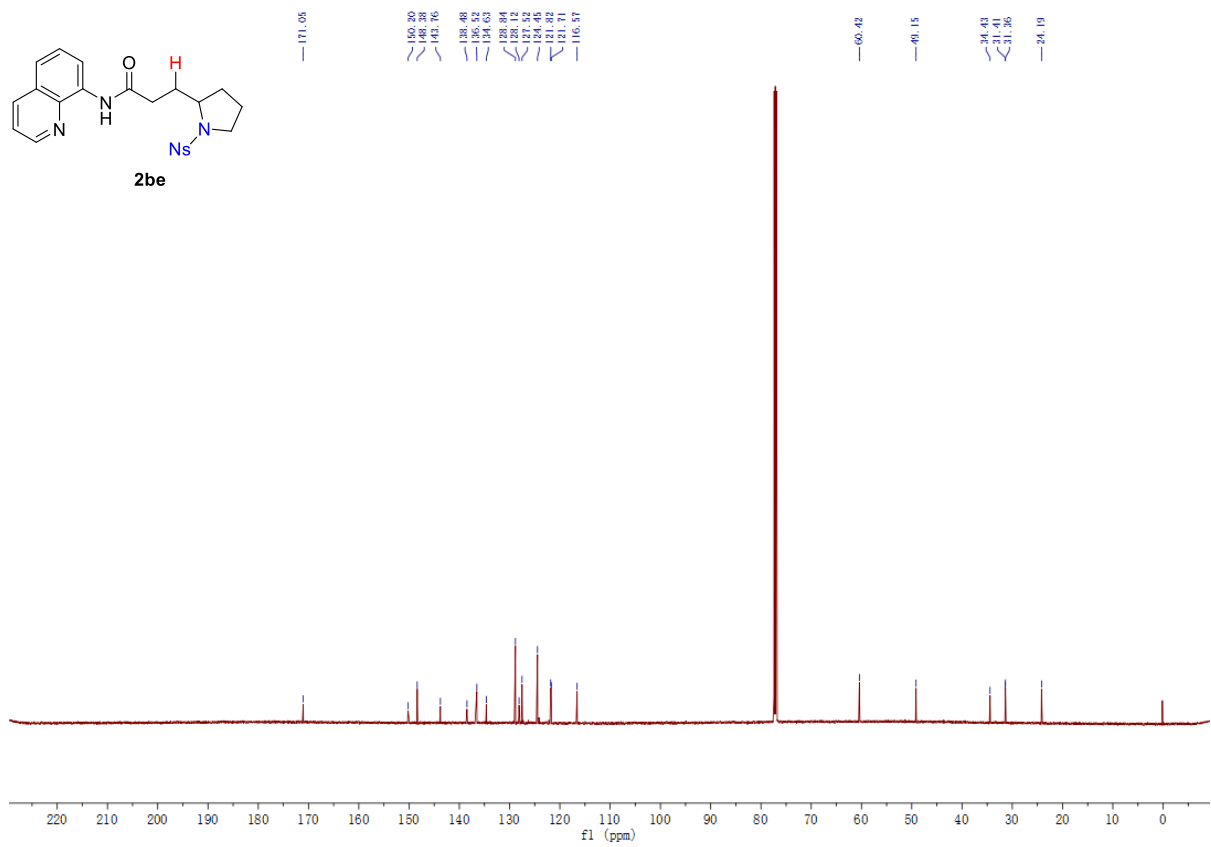



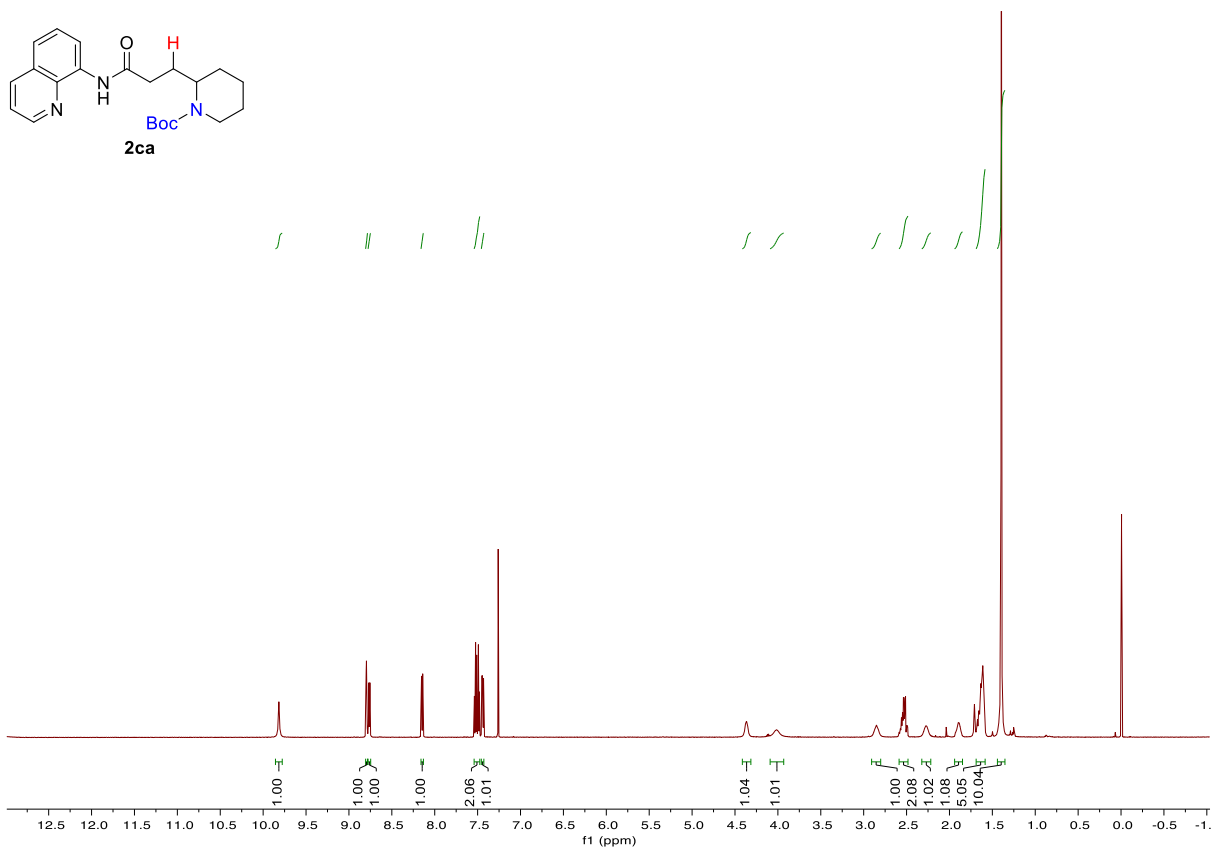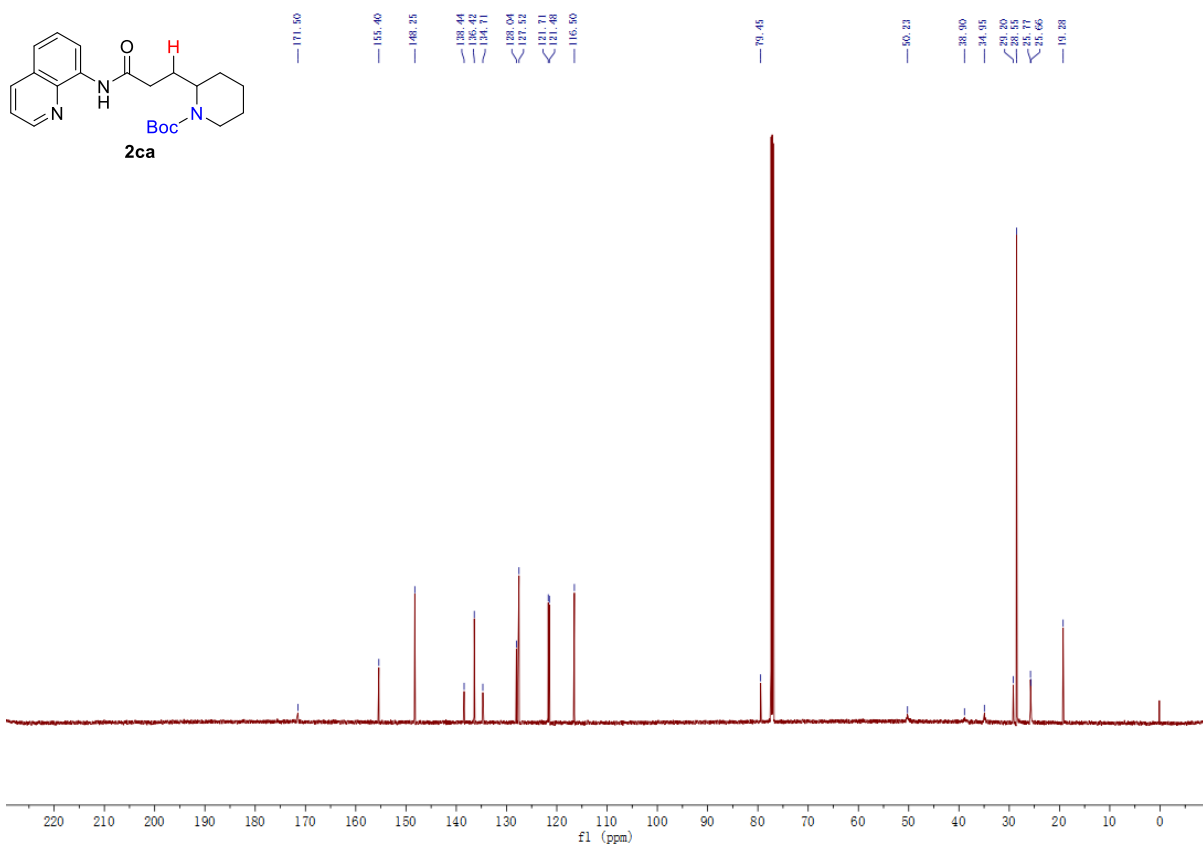

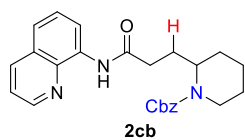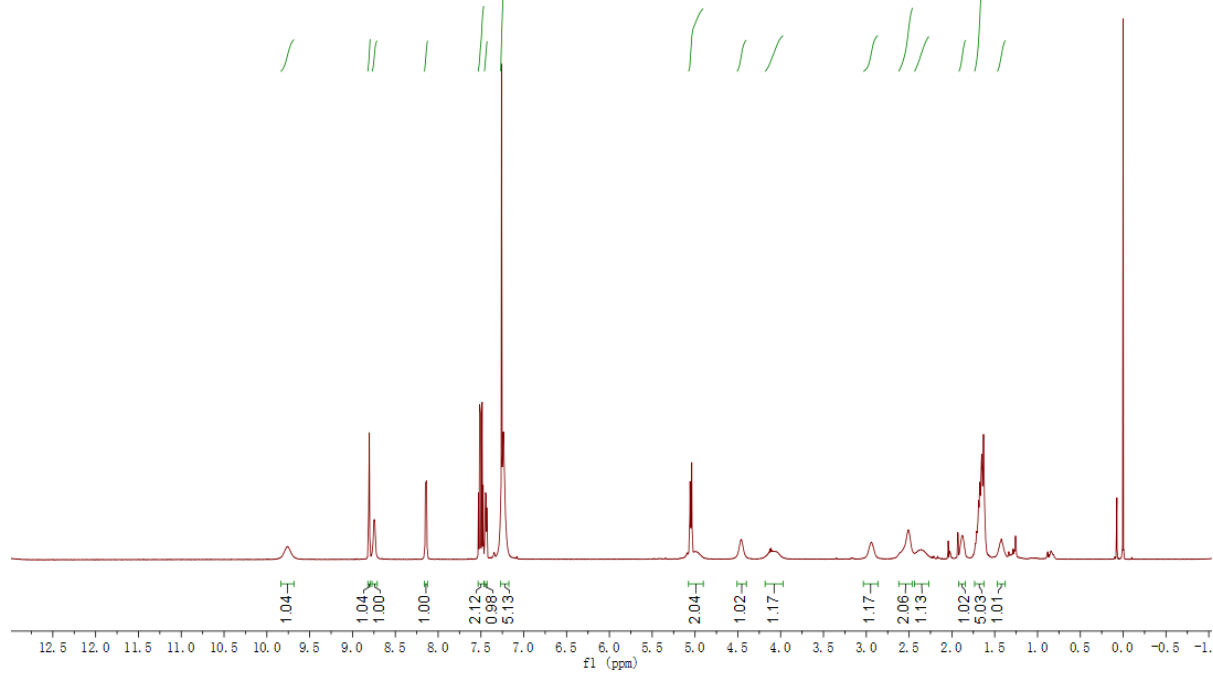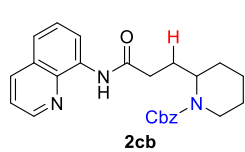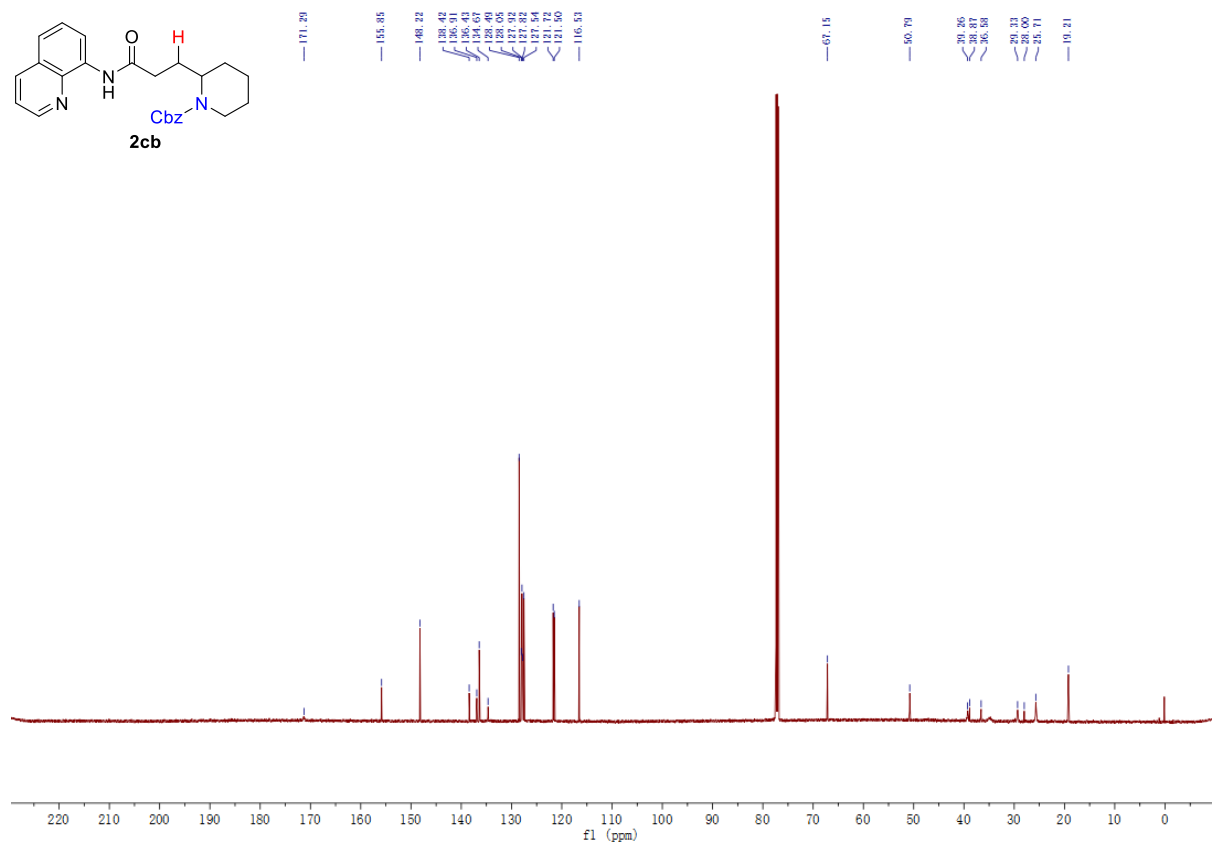

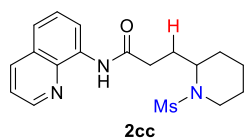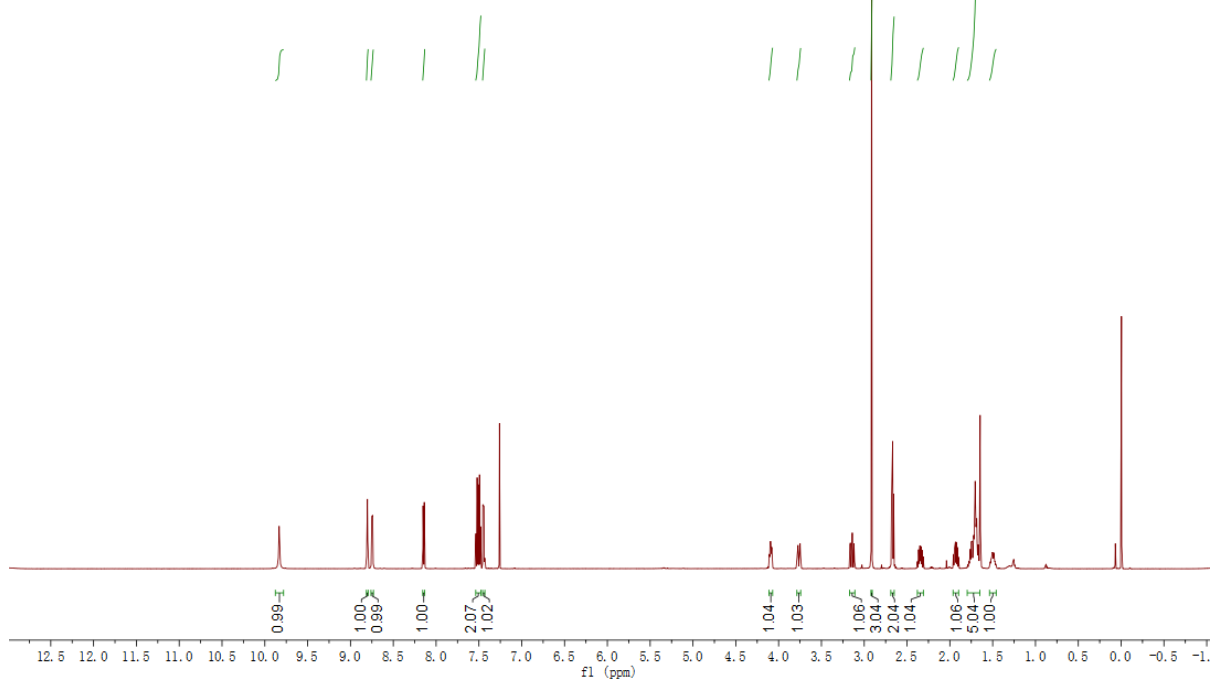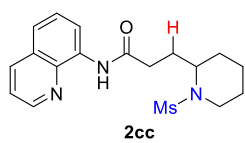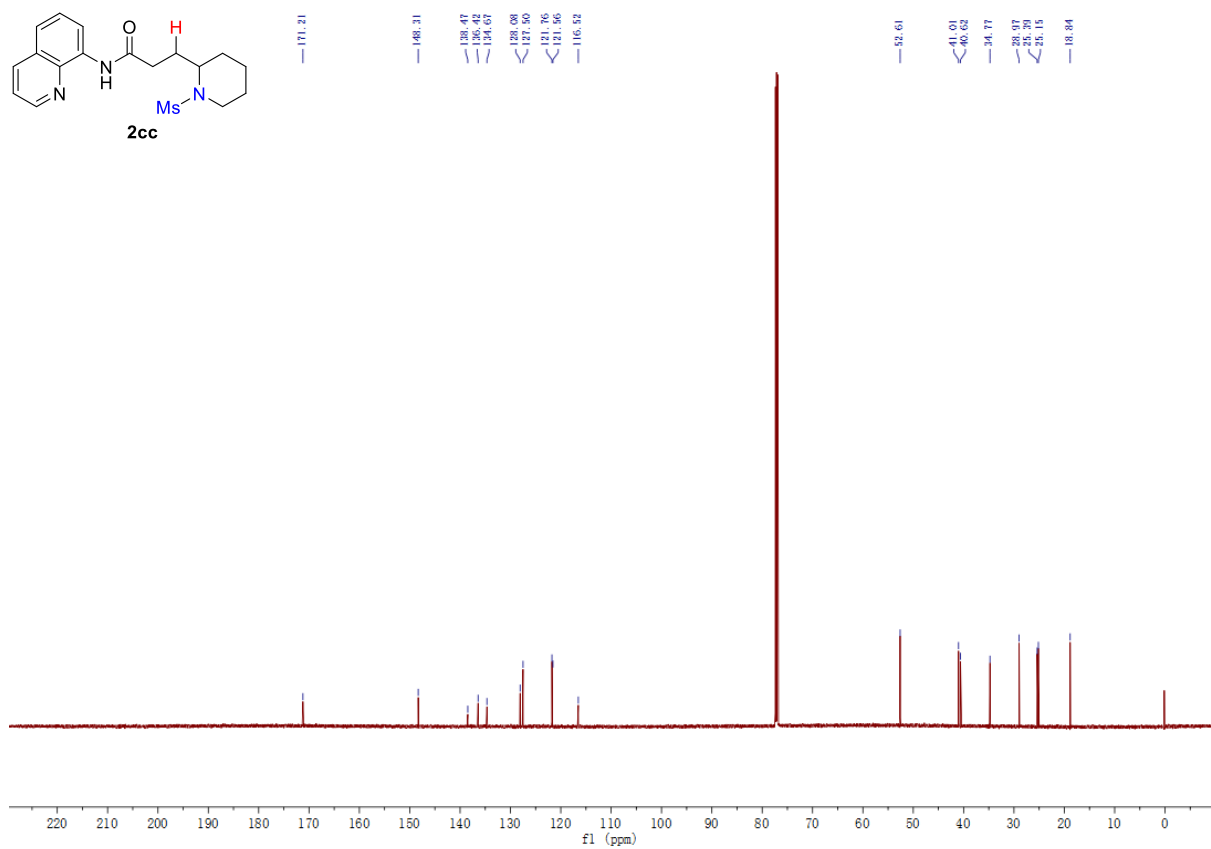

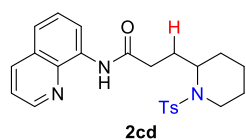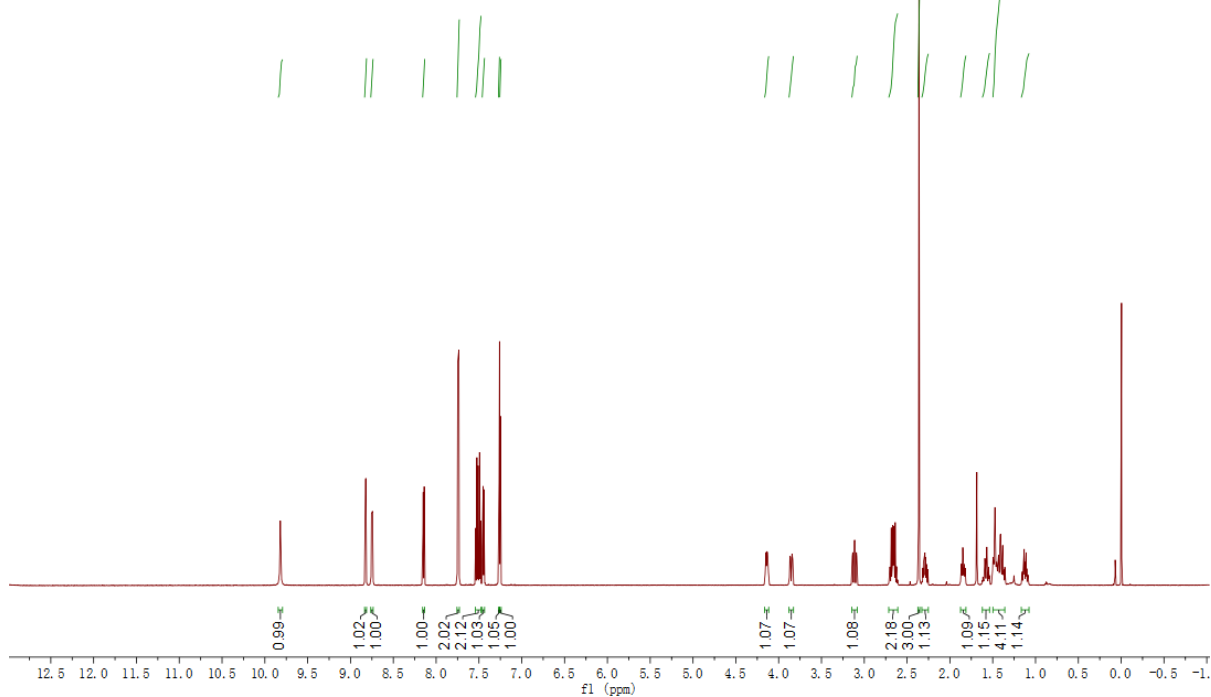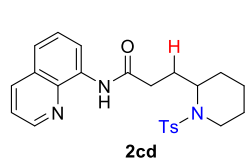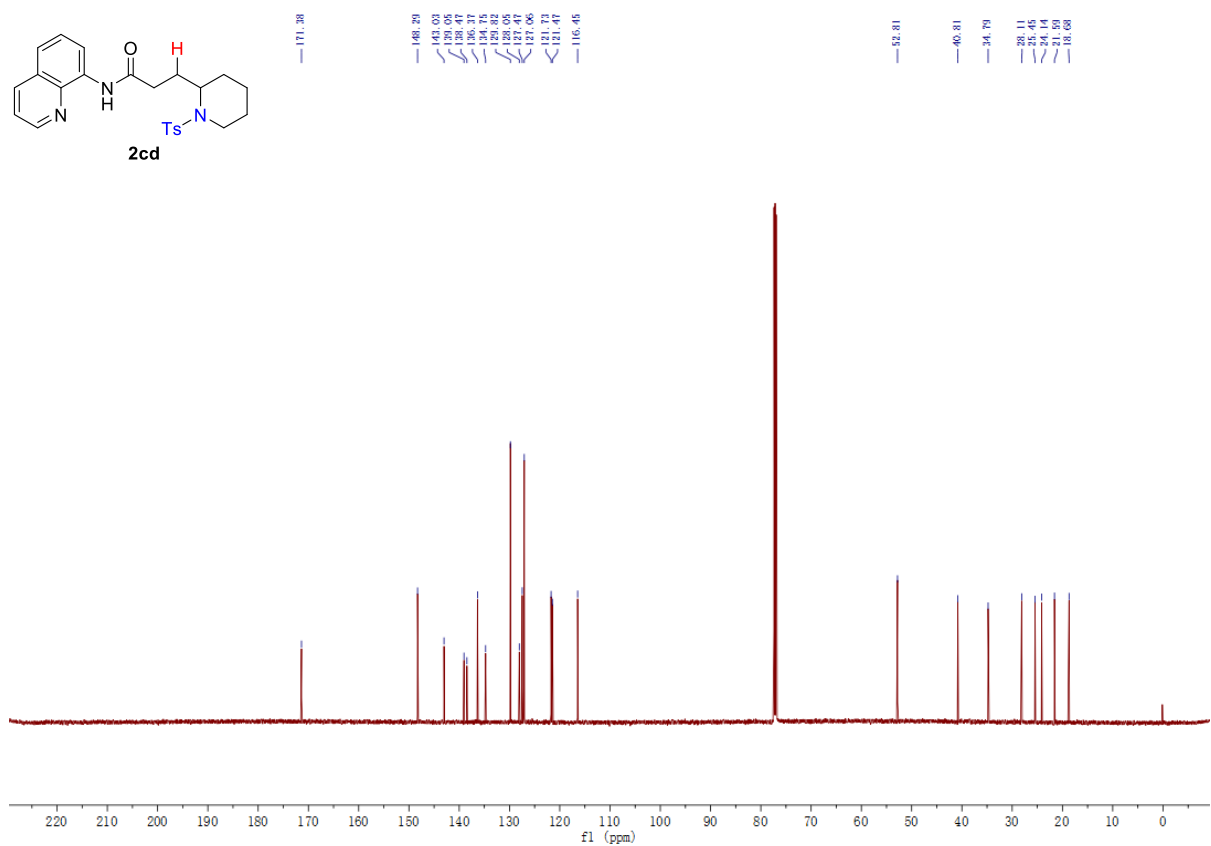

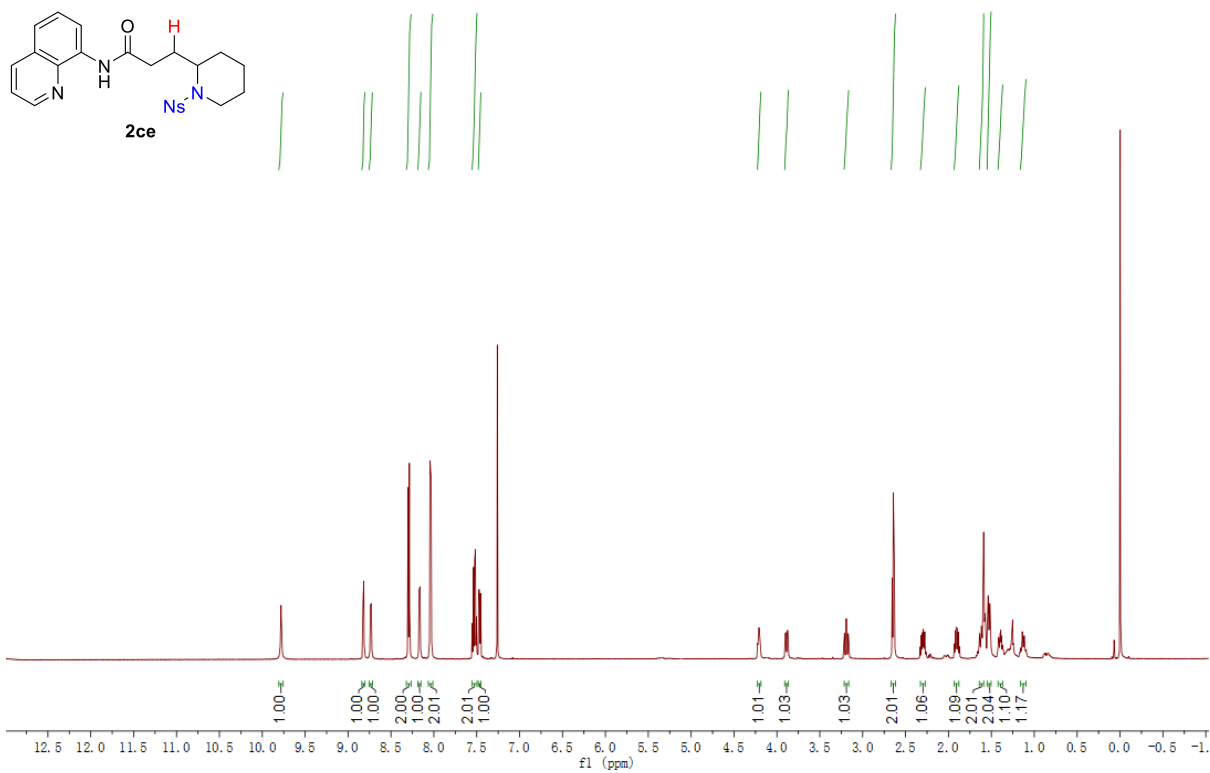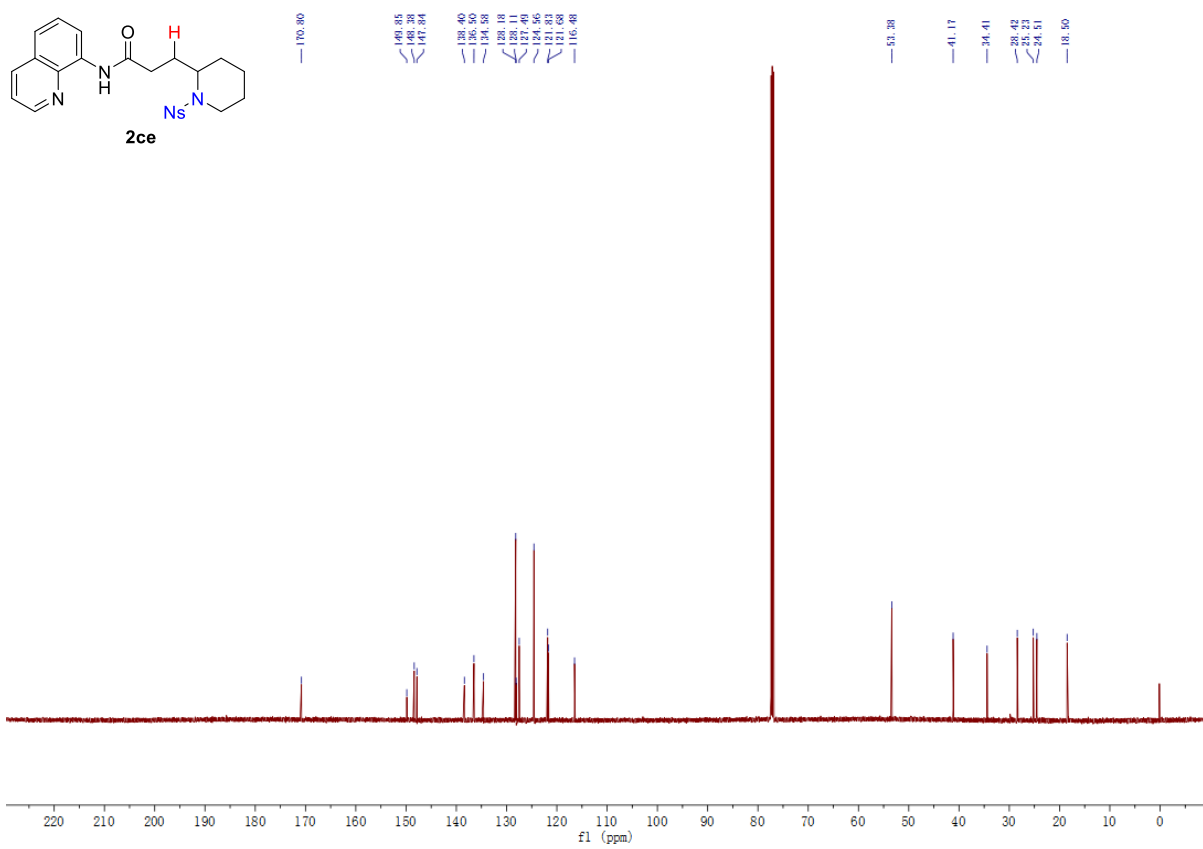

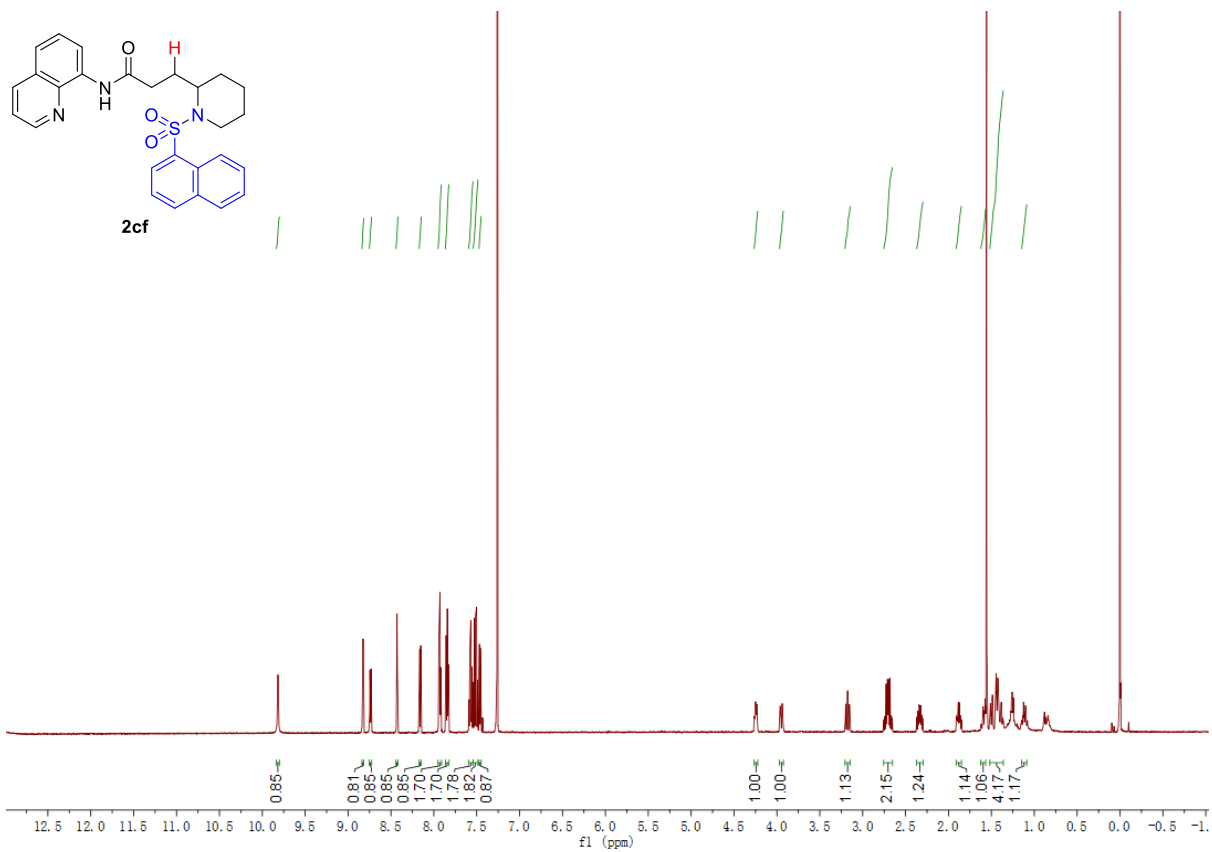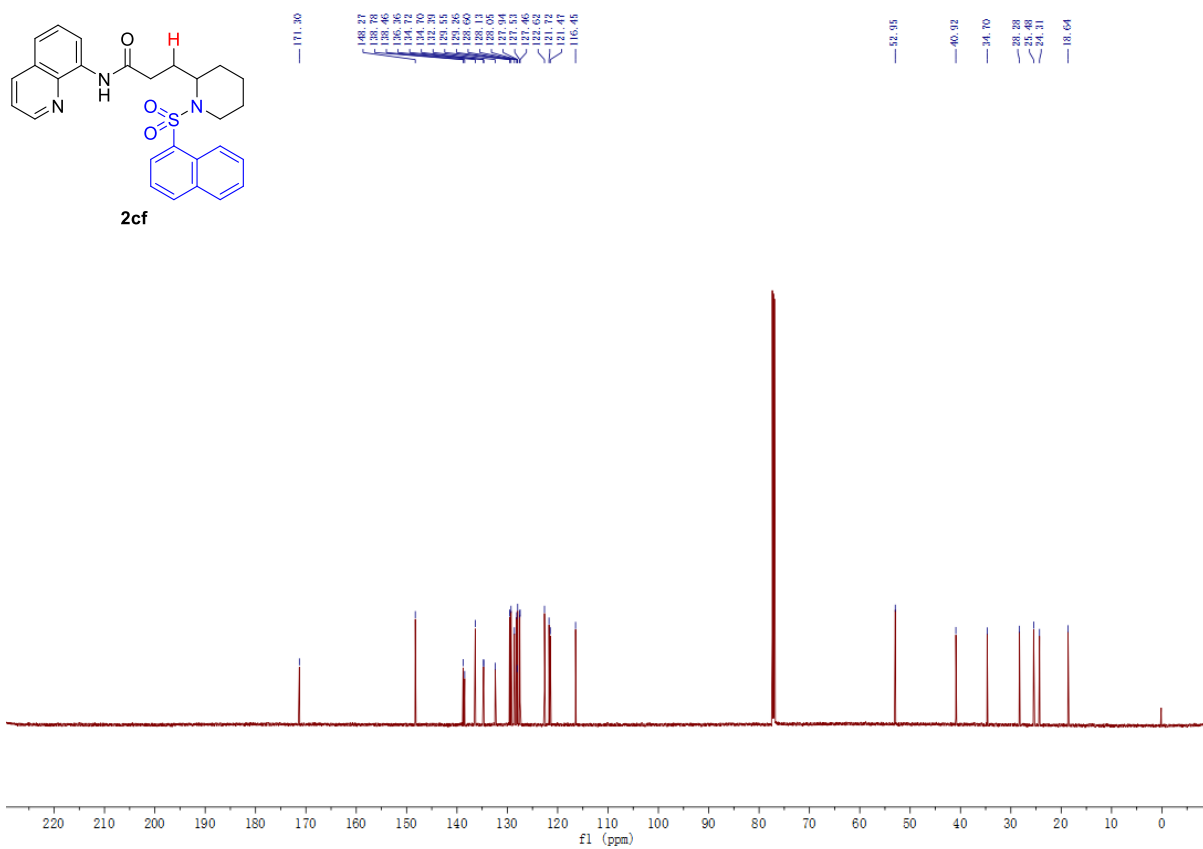

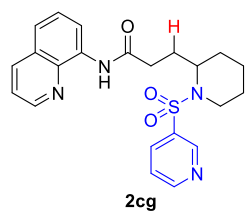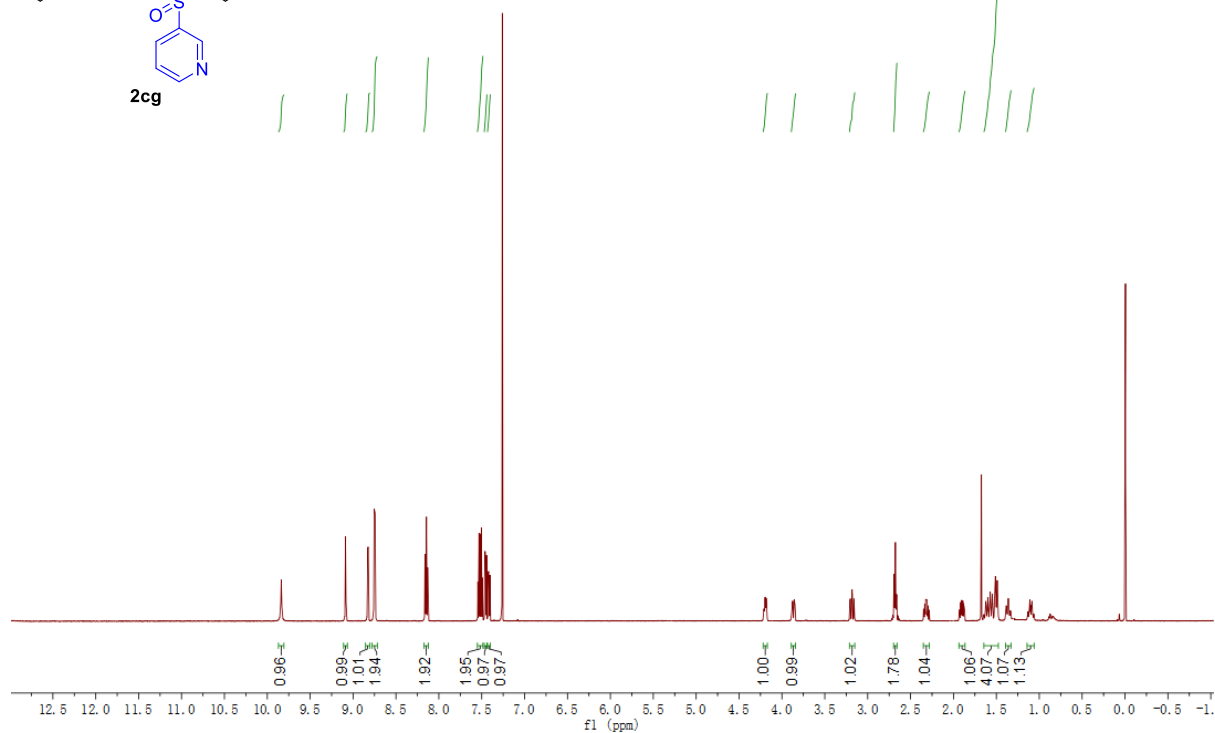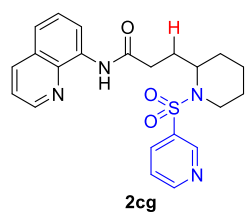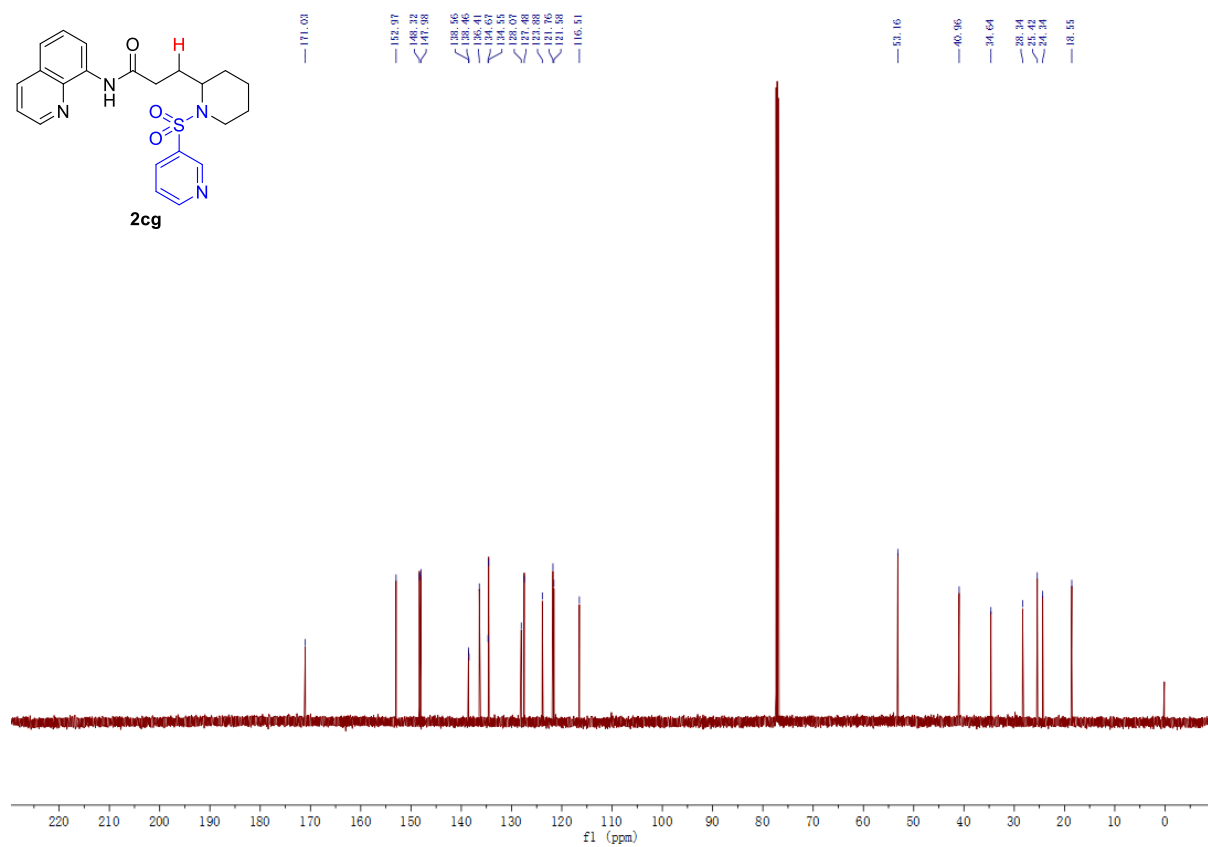

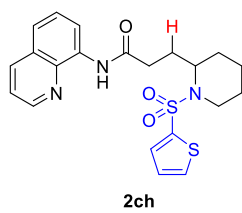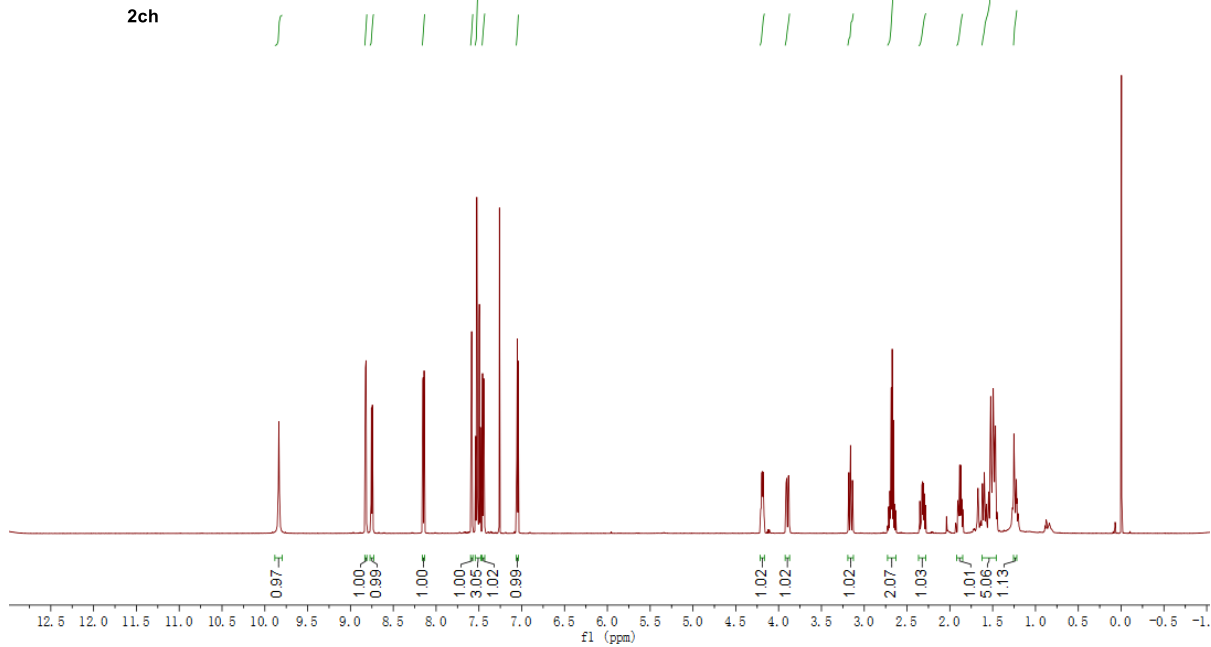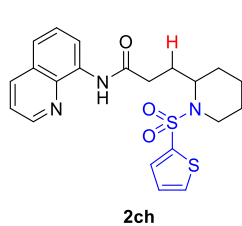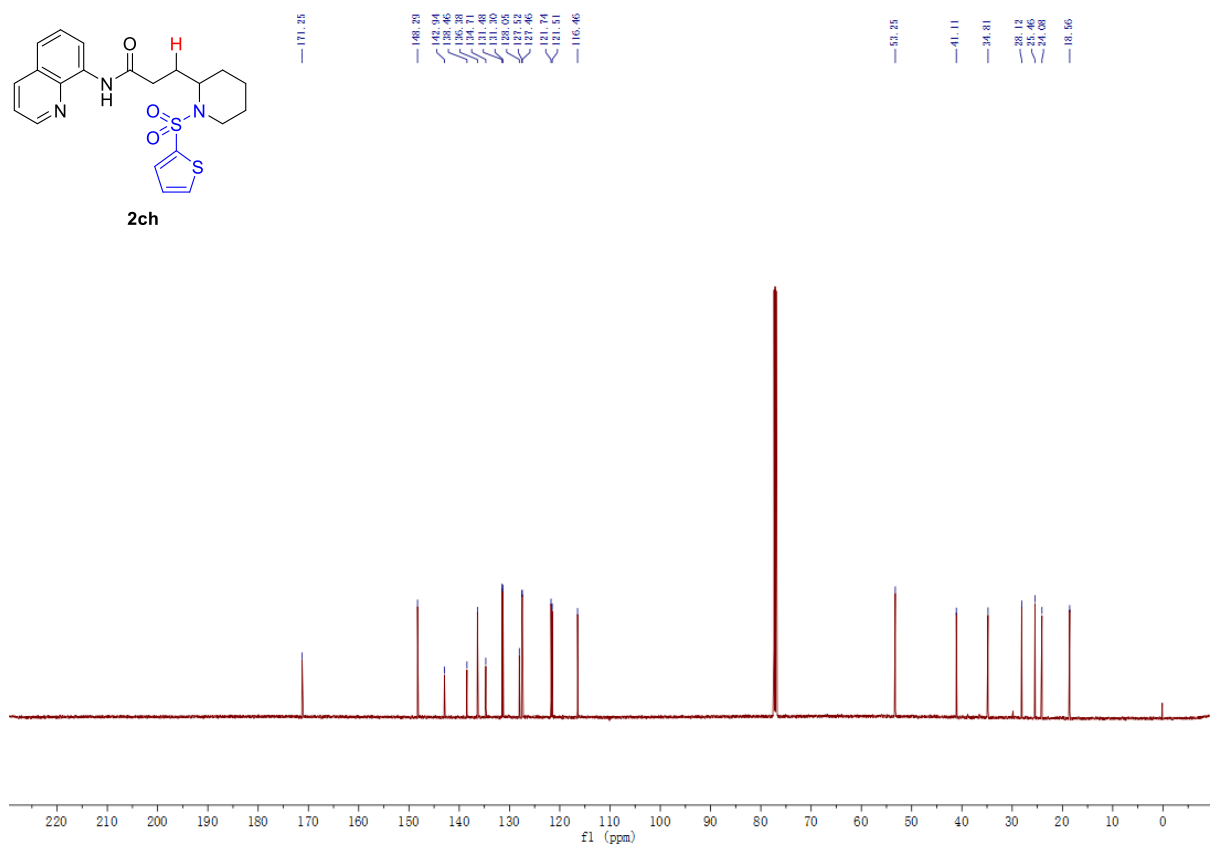



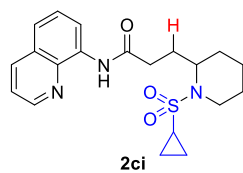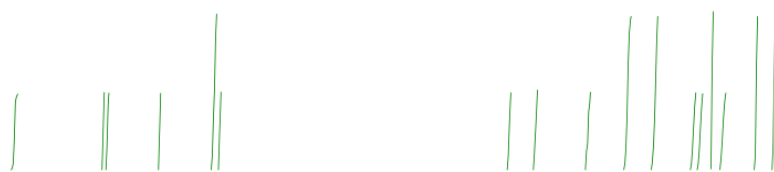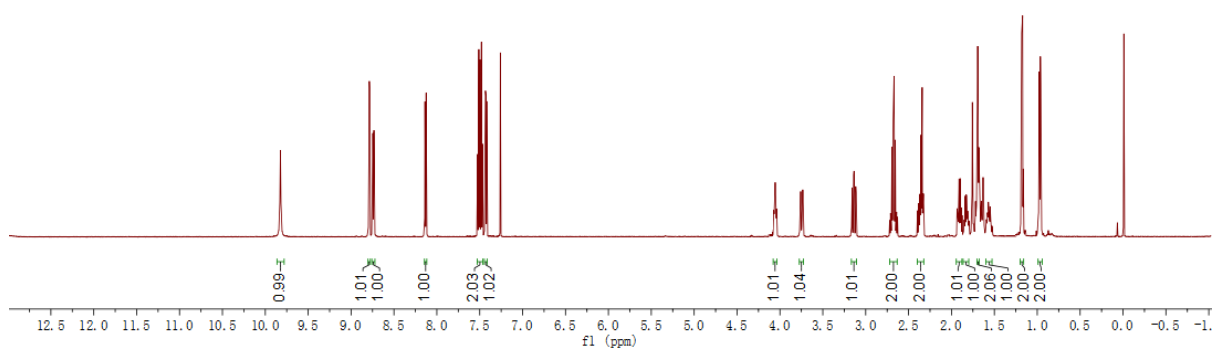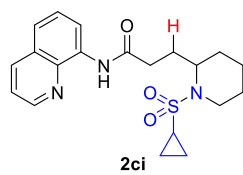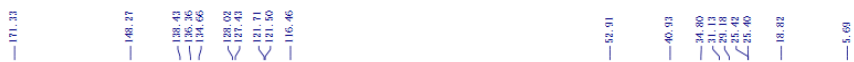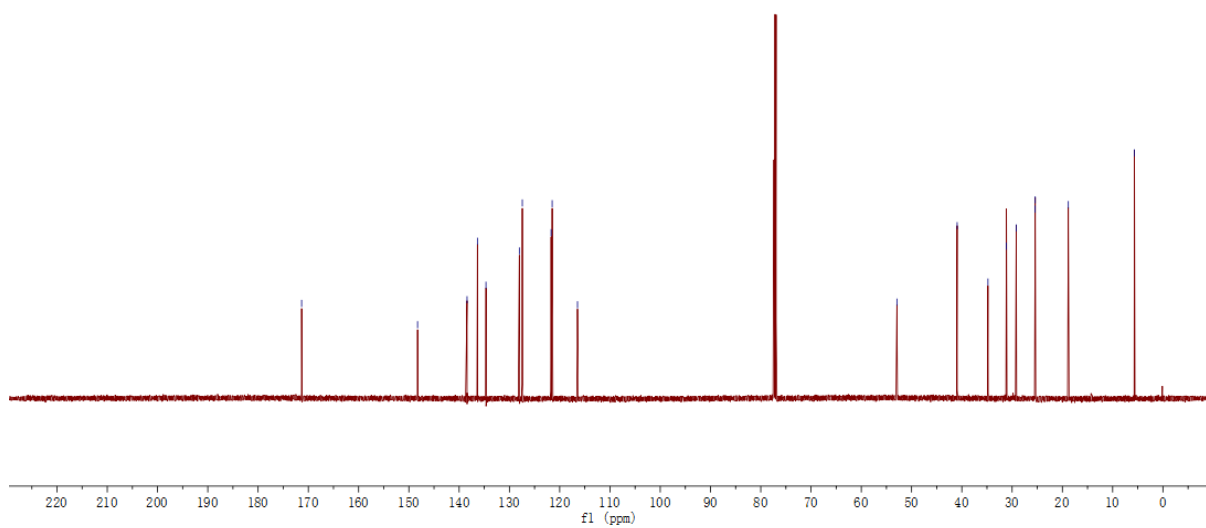

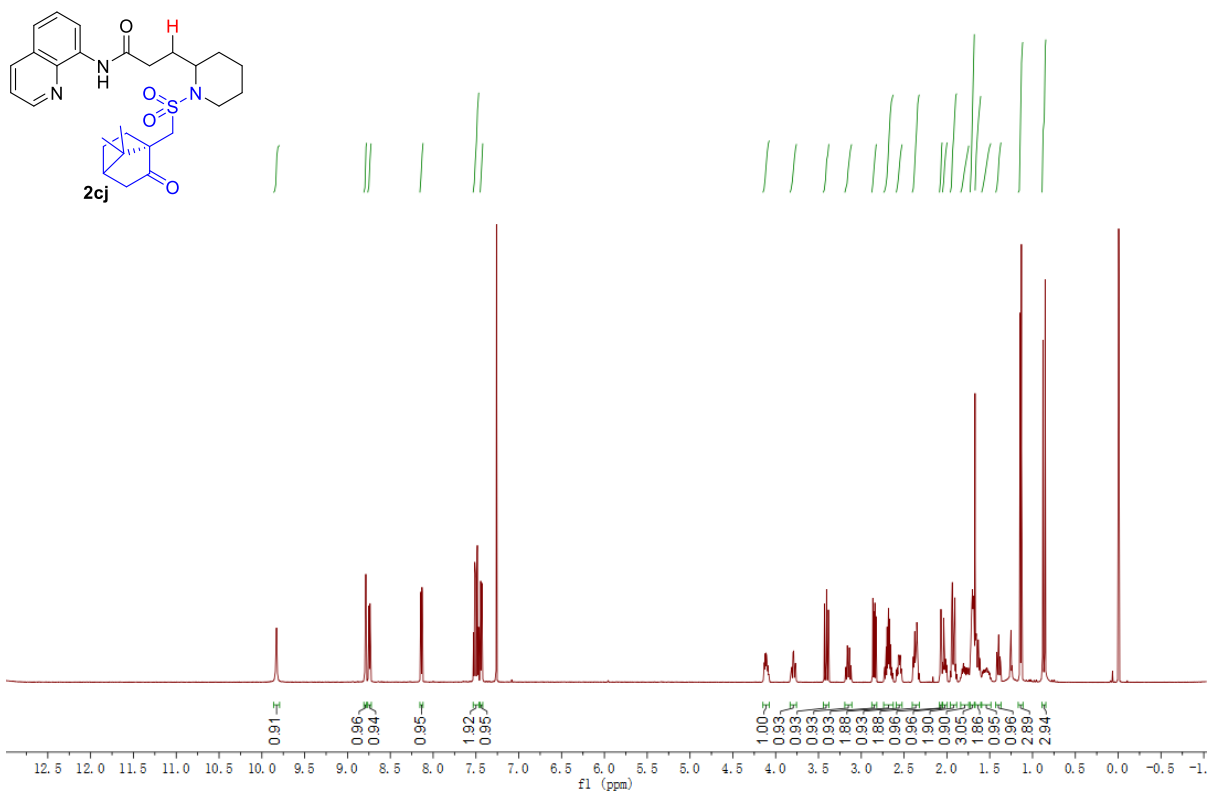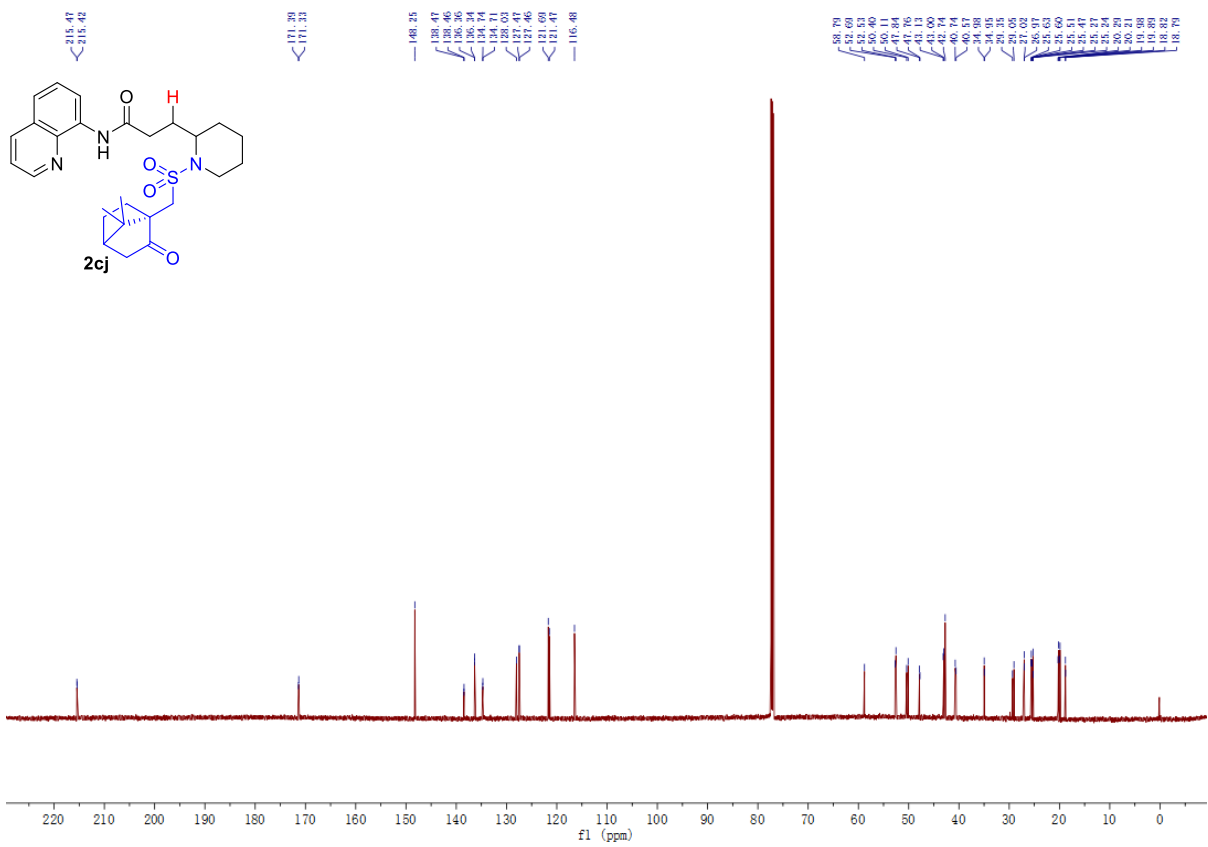



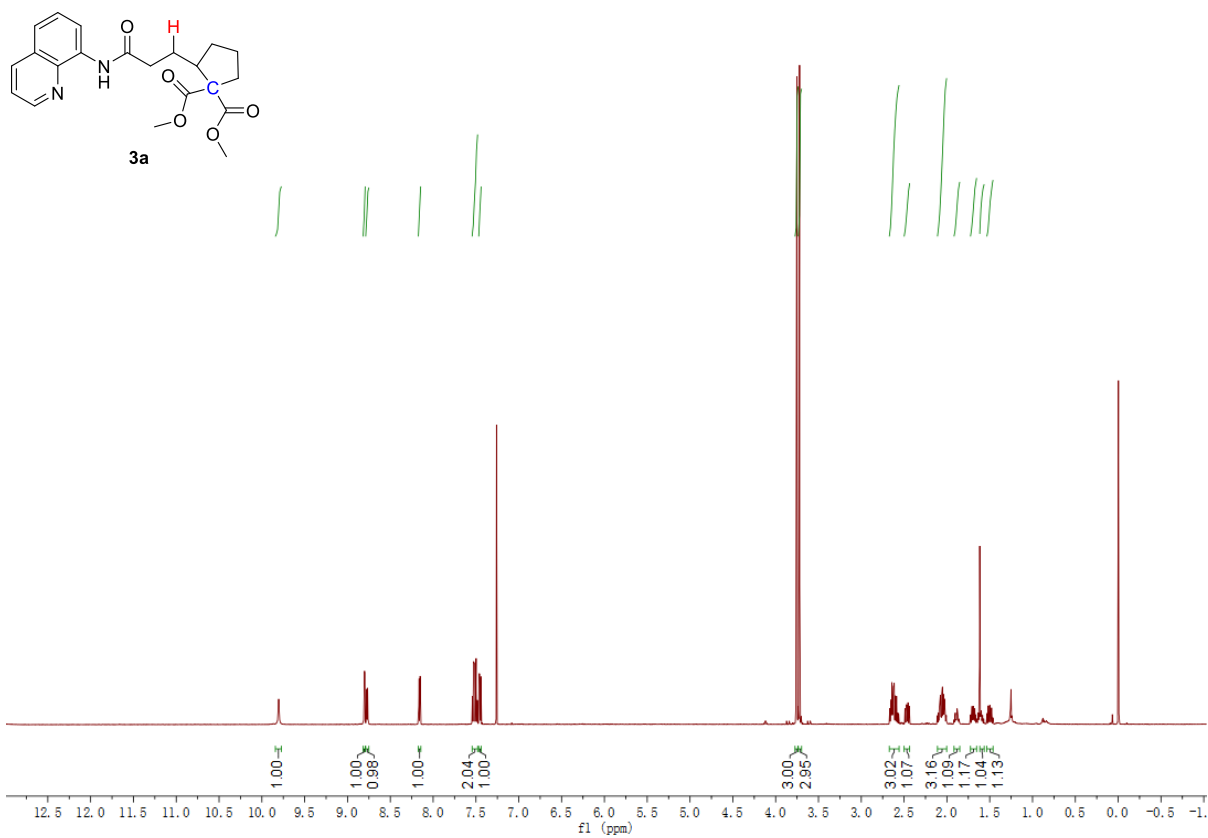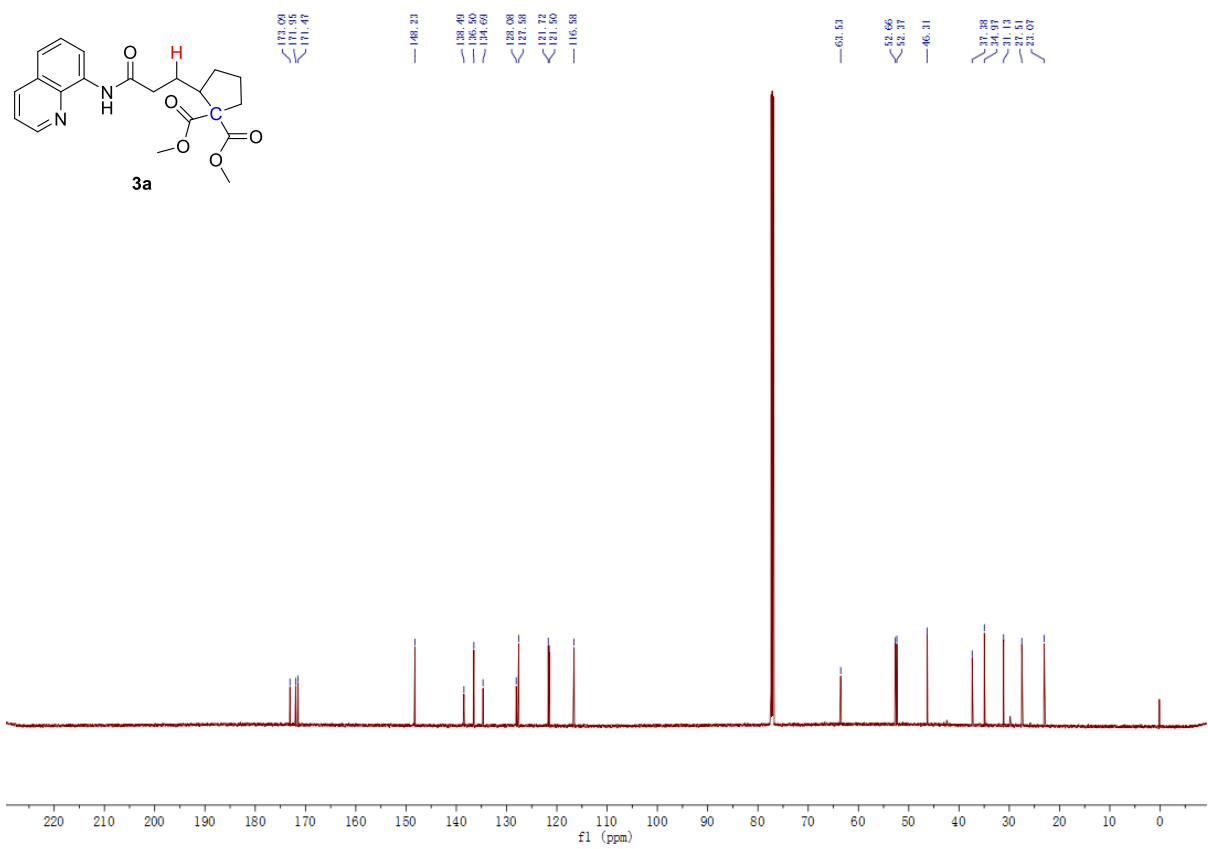

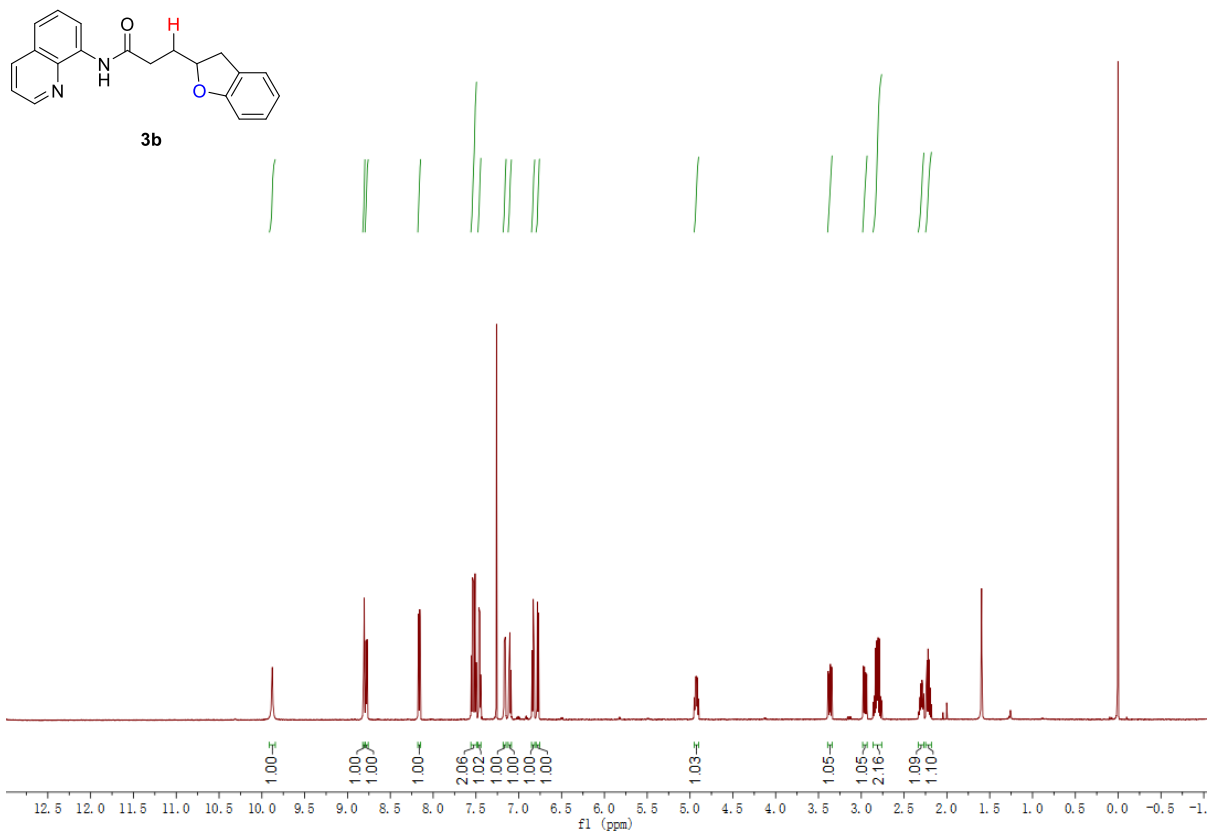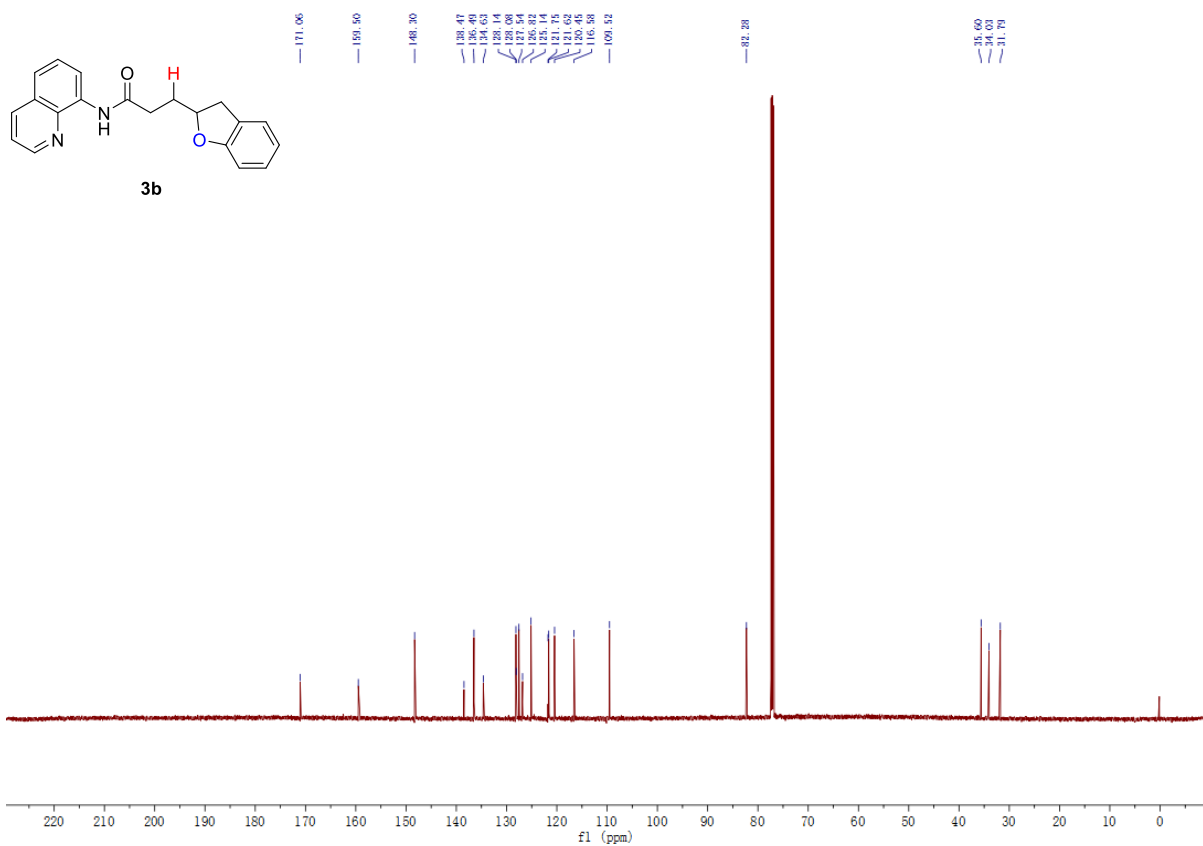

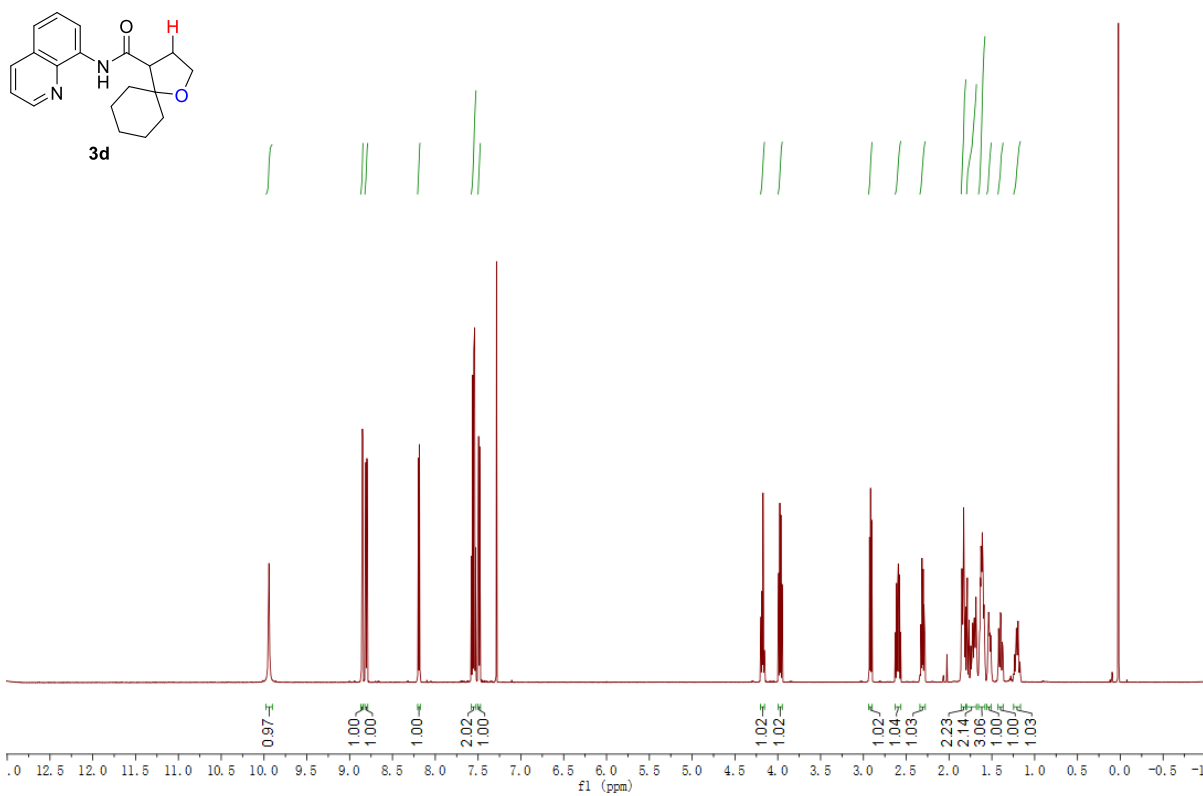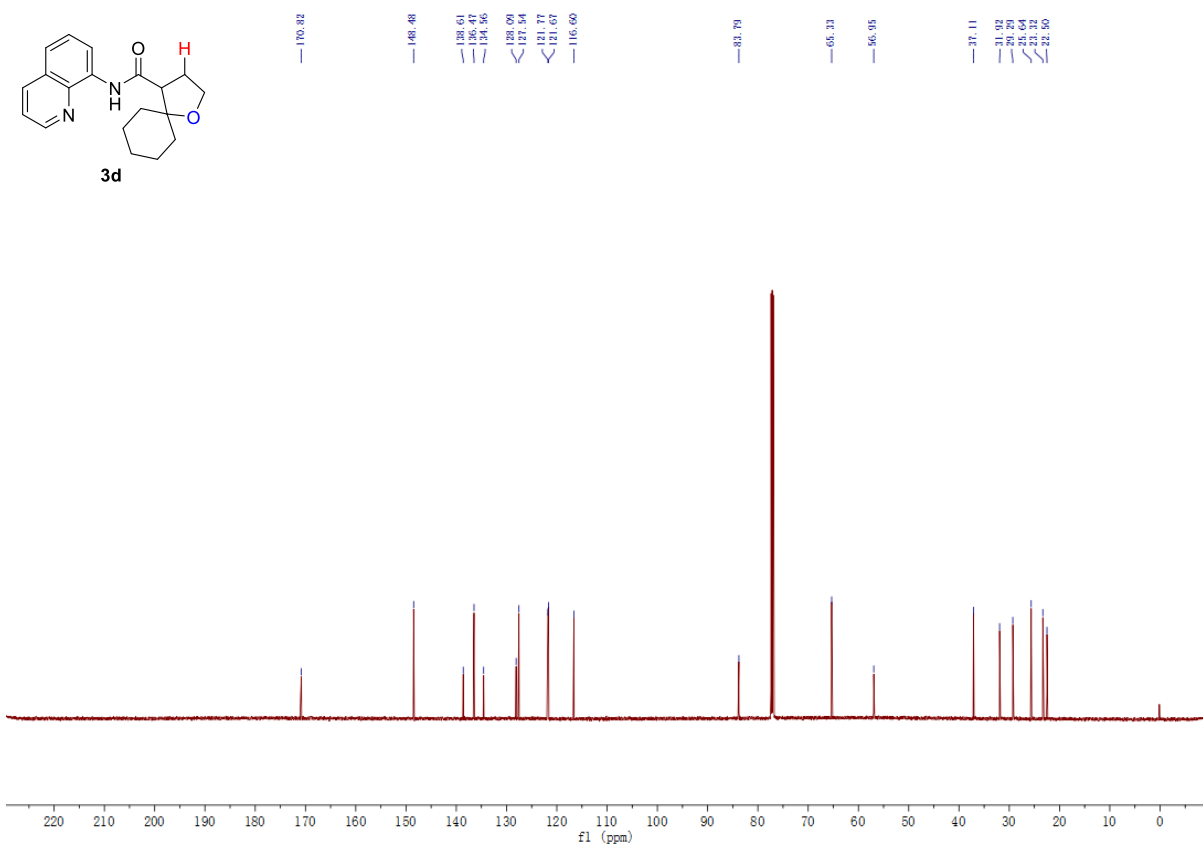



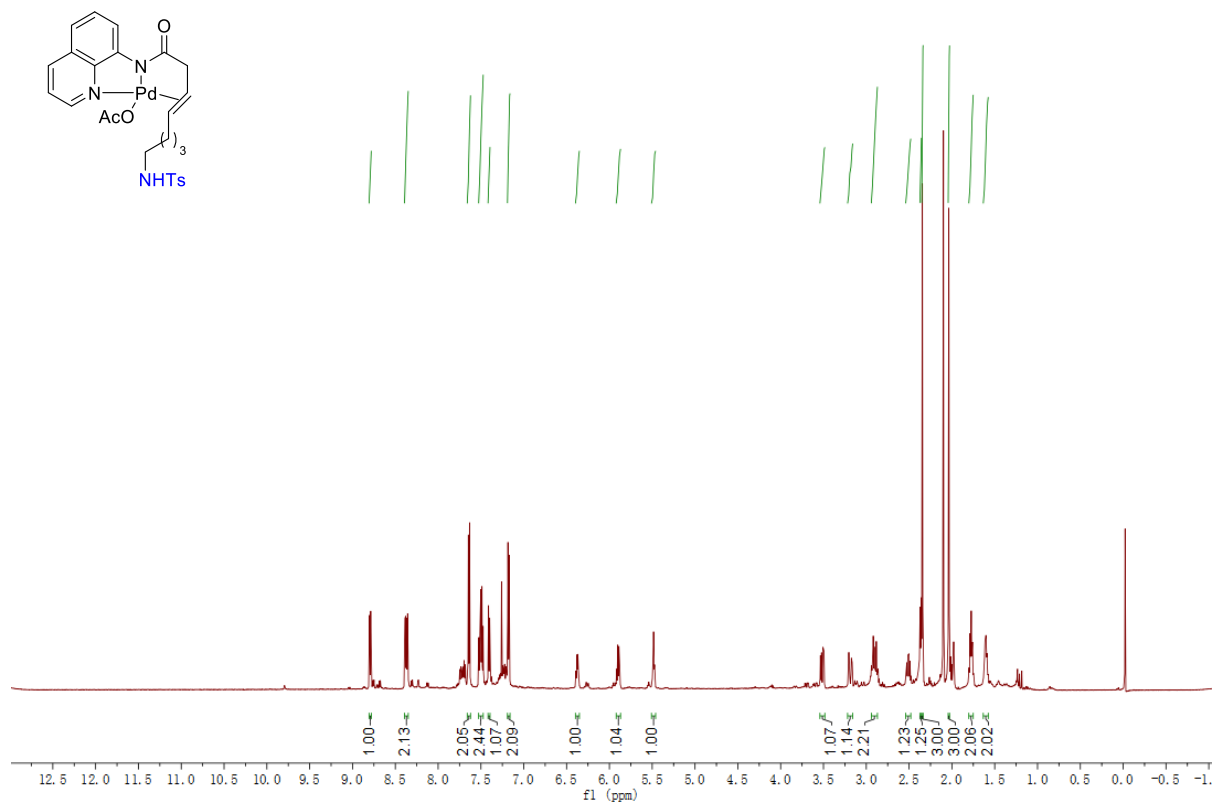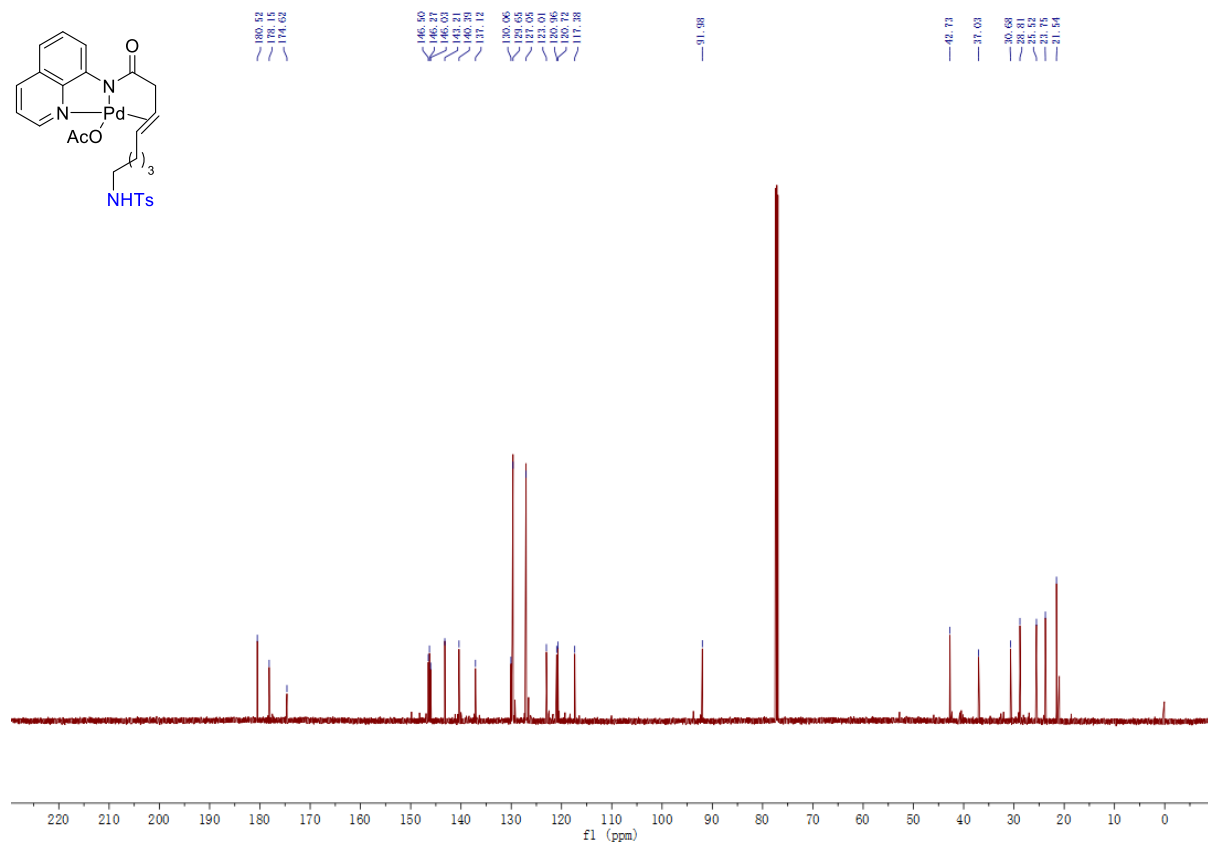



## Cartesian Coordinates

### 1a

|                                  |              |
|----------------------------------|--------------|
| M06 SCF energy (au)              | -1166.341418 |
| M06 enthalpy (au)                | -1165.888822 |
| M06 free energy (au)             | -1165.976382 |
| M06 SCF energy in solution (au)  | -1166.696957 |
| M06 enthalpy in solution (au)    | -1166.244361 |
| M06 free energy in solution (au) | -1166.331921 |

### Cartesian coordinates

| ATOM | X           | Y           | Z           |
|------|-------------|-------------|-------------|
| C    | 0.26127200  | 0.88382400  | 2.05171500  |
| O    | 0.79898900  | 1.85947800  | 2.54469100  |
| N    | -0.33370100 | -0.11620500 | 2.77696700  |
| C    | -0.47153400 | -0.21282600 | 4.16079800  |
| C    | -1.16891200 | -1.37495600 | 4.62079400  |
| C    | 0.00381200  | 0.70405800  | 5.07611100  |
| C    | -1.36155400 | -1.56655000 | 6.01500000  |
| C    | -0.19929600 | 0.49345700  | 6.45587100  |
| H    | 0.53171600  | 1.58148800  | 4.71922400  |
| C    | -2.26202300 | -3.32275300 | 4.10200000  |
| C    | -2.05683400 | -2.73142000 | 6.41004100  |
| C    | -0.86359900 | -0.60968000 | 6.92888400  |
| H    | 0.18701800  | 1.23414100  | 7.15405600  |
| C    | -2.50868100 | -3.61195200 | 5.46077600  |
| H    | -2.22380700 | -2.91236600 | 7.47231700  |
| H    | -1.01563300 | -0.76463200 | 7.99667200  |
| H    | -3.04657800 | -4.51654600 | 5.73512900  |
| N    | -1.62076300 | -2.25292200 | 3.68928000  |
| H    | -2.61301500 | -4.01000400 | 3.32921500  |
| C    | 1.29870700  | 1.30998200  | -0.18321100 |
| H    | 1.56018200  | 2.32478800  | 0.12500600  |
| C    | 1.99067300  | 0.70663800  | -1.14797800 |
| H    | 1.72819600  | -0.31898400 | -1.43206500 |
| C    | 3.14795500  | 1.31302500  | -1.87117000 |
| H    | 2.97438600  | 1.30419800  | -2.95878500 |
| H    | 3.27405200  | 2.36447100  | -1.57011200 |
| C    | 4.44116200  | 0.54297700  | -1.60423400 |
| H    | 4.67048700  | 0.54822600  | -0.53044600 |
| H    | 4.31721100  | -0.50518900 | -1.90643800 |
| N    | 5.58264000  | 1.06894400  | -2.32040200 |
| H    | 6.10179300  | 1.85003600  | -1.94430100 |
| C    | 5.78518900  | 0.76067600  | -3.63302400 |
| O    | 5.13278600  | -0.05939200 | -4.24972900 |
| O    | 6.81348600  | 1.48916600  | -4.11040200 |
| C    | 7.25729300  | 1.32510700  | -5.48713300 |
| C    | 8.40528100  | 2.31434800  | -5.59016200 |
| H    | 8.83763800  | 2.28717600  | -6.59859000 |
| H    | 8.05575600  | 3.33495800  | -5.38858900 |
| H    | 9.19303500  | 2.06906100  | -4.86657800 |
| C    | 6.14423500  | 1.70361300  | -6.45061400 |
| H    | 5.30924000  | 0.99963700  | -6.39042800 |
| H    | 5.77595300  | 2.71362600  | -6.22620000 |
| H    | 6.53346300  | 1.70426400  | -7.47771000 |
| C    | 7.75717100  | -0.09211100 | -5.71400900 |
| H    | 8.52872500  | -0.34455000 | -4.97450200 |

|   |             |             |             |
|---|-------------|-------------|-------------|
| H | 6.94224500  | -0.81787700 | -5.63832200 |
| H | 8.20609800  | -0.16713300 | -6.71362700 |
| C | 0.15211200  | 0.69092900  | 0.54694800  |
| H | 0.04915500  | -0.37228300 | 0.28489700  |
| H | -0.79364200 | 1.17553000  | 0.24669800  |
| H | -0.75867800 | -0.90251500 | 2.28955100  |

## 2a

|                                  |              |
|----------------------------------|--------------|
| M06 SCF energy (au)              | -1166.347582 |
| M06 enthalpy (au)                | -1165.894223 |
| M06 free energy (au)             | -1165.971919 |
| M06 SCF energy in solution (au)  | -1166.694406 |
| M06 enthalpy in solution (au)    | -1166.241047 |
| M06 free energy in solution (au) | -1166.318743 |

## Cartesian coordinates

| ATOM | X           | Y           | Z           |
|------|-------------|-------------|-------------|
| C    | 0.00331300  | 1.07868000  | 1.15922500  |
| O    | -0.61319100 | 2.10367900  | 0.93116000  |
| N    | -0.08378000 | 0.37919200  | 2.34342000  |
| C    | -0.71182600 | 0.78843600  | 3.51581900  |
| C    | -0.28748200 | 0.12579200  | 4.71113700  |
| C    | -1.70299200 | 1.74720600  | 3.58581600  |
| C    | -0.88979900 | 0.46981700  | 5.95158100  |
| C    | -2.28224600 | 2.07903400  | 4.82810700  |
| H    | -2.02023800 | 2.24453400  | 2.67525700  |
| C    | 1.07613300  | -1.43372900 | 5.69851700  |
| C    | -0.43383500 | -0.21861600 | 7.09798700  |
| C    | -1.89567200 | 1.46281600  | 5.99212000  |
| H    | -3.05693100 | 2.84408000  | 4.84982200  |
| C    | 0.54635300  | -1.17026300 | 6.97899100  |
| H    | -0.87337800 | 0.02019800  | 8.06691900  |
| H    | -2.34996300 | 1.72110300  | 6.94826800  |
| H    | 0.91652900  | -1.71631800 | 7.84366900  |
| N    | 0.68329100  | -0.81853400 | 4.60556300  |
| H    | 1.85838400  | -2.18663300 | 5.58028000  |
| C    | 1.98569000  | 1.40040600  | -0.37496200 |
| H    | 1.49809600  | 2.33868800  | -0.67524000 |
| C    | 3.04987100  | 1.73103700  | 0.65856100  |
| H    | 3.73479400  | 2.48827800  | 0.24496100  |
| C    | 3.77896700  | 0.57752200  | 1.39341800  |
| H    | 3.42366500  | -0.42730800 | 1.13737500  |
| H    | 4.86890500  | 0.59309800  | 1.30038000  |
| C    | 3.22855300  | 1.13642400  | 2.72399700  |
| H    | 2.58237600  | 0.47002700  | 3.31552400  |
| H    | 3.98410600  | 1.57168800  | 3.39324600  |
| N    | 2.50184600  | 2.13812700  | 1.94934200  |
| H    | 2.47128500  | 0.98257200  | -1.26924200 |
| C    | 2.07994200  | 3.39332600  | 2.27687900  |
| O    | 1.96491600  | 4.29013200  | 1.46576200  |
| O    | 1.81193500  | 3.44243100  | 3.59205700  |
| C    | 1.27542300  | 4.65772000  | 4.18957300  |
| C    | 0.96763700  | 4.22177600  | 5.61179600  |
| H    | 0.59135200  | 5.07341300  | 6.19365500  |
| H    | 0.20336100  | 3.43139400  | 5.61579200  |
| H    | 1.87101800  | 3.83626600  | 6.10193500  |
| C    | 0.00066500  | 5.09263600  | 3.48519000  |
| H    | 0.20202700  | 5.48410600  | 2.48484200  |
| H    | -0.67956400 | 4.23683000  | 3.39019300  |
| H    | -0.49717400 | 5.86781800  | 4.08396100  |

|   |            |             |             |
|---|------------|-------------|-------------|
| C | 2.33879900 | 5.74257200  | 4.17058100  |
| H | 3.24814400 | 5.39722900  | 4.68062900  |
| H | 2.59071100 | 6.02431300  | 3.14285000  |
| H | 1.96915700 | 6.63337800  | 4.69641400  |
| C | 0.90560600 | 0.43945700  | 0.11931700  |
| H | 1.34234200 | -0.50198900 | 0.48469200  |
| H | 0.25918500 | 0.17453400  | -0.72897100 |
| H | 0.55839500 | -0.39391300 | 2.49689200  |

### 1b

|                                  |              |
|----------------------------------|--------------|
| M06 SCF energy (au)              | -1205.622845 |
| M06 enthalpy (au)                | -1205.140285 |
| M06 free energy (au)             | -1205.231109 |
| M06 SCF energy in solution (au)  | -1205.989755 |
| M06 enthalpy in solution (au)    | -1205.507195 |
| M06 free energy in solution (au) | -1205.598019 |

### Cartesian coordinates

| ATOM | X           | Y           | Z           |
|------|-------------|-------------|-------------|
| C    | 0.55119900  | -0.37190400 | 1.52412200  |
| O    | 1.30685000  | 0.56072000  | 1.73354600  |
| N    | -0.31001900 | -0.89108100 | 2.45436100  |
| C    | -0.48351400 | -0.49872000 | 3.78135700  |
| C    | -1.46077000 | -1.24715600 | 4.51119600  |
| C    | 0.19987700  | 0.52381000  | 4.40698400  |
| C    | -1.71272100 | -0.92504300 | 5.87152000  |
| C    | -0.06583300 | 0.82561800  | 5.75895500  |
| H    | 0.93725500  | 1.08738300  | 3.84614100  |
| C    | -3.01136600 | -2.93620900 | 4.52131600  |
| C    | -2.68873800 | -1.69697200 | 6.54094900  |
| C    | -0.99623300 | 0.12740000  | 6.48611300  |
| H    | 0.48895100  | 1.63762200  | 6.22595500  |
| C    | -3.34056000 | -2.70174400 | 5.87305900  |
| H    | -2.90935700 | -1.47874200 | 7.58629600  |
| H    | -1.19561200 | 0.36789600  | 7.53000900  |
| H    | -4.09634000 | -3.31195800 | 6.36221000  |
| N    | -2.11156700 | -2.24449800 | 3.85952800  |
| H    | -3.51791900 | -3.73158100 | 3.97038900  |
| C    | 0.69983000  | -0.14459300 | -0.95676400 |
| H    | 1.48784800  | 0.60217400  | -0.82585300 |
| C    | -0.04520300 | -0.14235400 | -2.06177800 |
| H    | -0.84128400 | -0.89007800 | -2.16682400 |
| C    | 0.13253500  | 0.79587900  | -3.21233500 |
| H    | -0.78167100 | 1.39470400  | -3.34881400 |
| H    | 0.93713700  | 1.51106100  | -2.98235400 |
| C    | 1.70351300  | -0.78014700 | -4.46012400 |
| H    | 1.58231000  | -1.58953600 | -3.72772900 |
| H    | 1.89104300  | -1.24168000 | -5.43728000 |
| N    | 2.88982100  | -0.03613800 | -4.08818500 |
| H    | 3.14244400  | 0.06379600  | -3.11470500 |
| C    | 3.53921900  | 0.74716200  | -4.99372500 |
| O    | 3.25702300  | 0.80079200  | -6.17556300 |
| O    | 4.52888300  | 1.42220900  | -4.37554900 |
| C    | 5.38947800  | 2.32215200  | -5.12876700 |
| C    | 6.33375300  | 2.85384500  | -4.06445900 |
| H    | 7.04793200  | 3.55765000  | -4.51087500 |
| H    | 5.77496600  | 3.37642200  | -3.27766600 |
| H    | 6.89614900  | 2.03295700  | -3.60170600 |
| C    | 4.57313000  | 3.45641400  | -5.72685000 |
| H    | 3.88596600  | 3.08941100  | -6.49475900 |

|   |             |             |             |
|---|-------------|-------------|-------------|
| H | 3.99416800  | 3.96114000  | -4.94184400 |
| H | 5.24824100  | 4.19521500  | -6.17945400 |
| C | 6.16287700  | 1.55114900  | -6.18599700 |
| H | 6.70402000  | 0.71459100  | -5.72416800 |
| H | 5.49561600  | 1.15870500  | -6.95891500 |
| H | 6.90029500  | 2.21462000  | -6.65774700 |
| C | 0.52220500  | -1.09330200 | 0.18540300  |
| H | 1.36017900  | -1.81128500 | 0.21513600  |
| H | -0.39371400 | -1.68858300 | 0.05989200  |
| C | 0.44331400  | 0.07386400  | -4.52397500 |
| H | 0.55669100  | 0.80858700  | -5.33347200 |
| H | -0.40241500 | -0.57604700 | -4.80095300 |
| H | -0.91707700 | -1.66687300 | 2.19774500  |

## 2b

|                                  |              |
|----------------------------------|--------------|
| M06 SCF energy (au)              | -1205.651814 |
| M06 enthalpy (au)                | -1205.167963 |
| M06 free energy (au)             | -1205.253318 |
| M06 SCF energy in solution (au)  | -1206.010724 |
| M06 enthalpy in solution (au)    | -1205.526873 |
| M06 free energy in solution (au) | -1205.612228 |

## Cartesian coordinates

| ATOM | X           | Y           | Z           |
|------|-------------|-------------|-------------|
| C    | -1.02763000 | 0.53013800  | 0.95060300  |
| O    | -0.76057800 | 1.40949200  | 1.74950600  |
| N    | -2.02358900 | -0.39831700 | 1.13269700  |
| C    | -2.90345100 | -0.52911400 | 2.20433900  |
| C    | -3.83478400 | -1.61096400 | 2.09484700  |
| C    | -2.93307300 | 0.28461500  | 3.31877800  |
| C    | -4.77547300 | -1.83038100 | 3.13631500  |
| C    | -3.87601000 | 0.04763500  | 4.34064000  |
| H    | -2.22474700 | 1.10198100  | 3.39552100  |
| C    | -4.62552100 | -3.38436400 | 0.87427200  |
| C    | -5.66920100 | -2.91219600 | 2.97319200  |
| C    | -4.78119200 | -0.98047300 | 4.26589100  |
| H    | -3.87445300 | 0.70632100  | 5.20755600  |
| C    | -5.59996300 | -3.69175100 | 1.84706400  |
| H    | -6.40560300 | -3.11092900 | 3.75246700  |
| H    | -5.50586400 | -1.15612700 | 5.06040000  |
| H    | -6.27481900 | -4.53093800 | 1.69467500  |
| N    | -3.77487000 | -2.38885600 | 0.98386500  |
| H    | -4.55224300 | -3.99178000 | -0.03040200 |
| C    | 0.87763300  | 1.30596300  | -0.51986000 |
| H    | 1.60703000  | 1.11534800  | 0.27838900  |
| C    | 1.56007900  | 1.14779200  | -1.87650800 |
| H    | 1.68748400  | 0.07454400  | -2.08717600 |
| C    | 0.81816600  | 1.85497200  | -3.01644700 |
| H    | 1.01843200  | 1.34300600  | -3.96849200 |
| H    | -0.26942700 | 1.86551700  | -2.86719400 |
| C    | 2.90988700  | 2.98025700  | -2.77600100 |
| H    | 3.45934900  | 2.75946700  | -3.70579400 |
| H    | 3.43292600  | 3.80480100  | -2.27754500 |
| N    | 2.87062700  | 1.80366500  | -1.91659400 |
| C    | 4.02100700  | 1.31370700  | -1.38150100 |
| O    | 5.10525100  | 1.85268400  | -1.50574800 |
| O    | 3.77496200  | 0.16733400  | -0.71172700 |
| C    | 4.82201400  | -0.47600400 | 0.06567500  |
| C    | 4.09459400  | -1.65448300 | 0.69037000  |
| H    | 4.78186500  | -2.23523900 | 1.31885500  |

|   |             |             |             |
|---|-------------|-------------|-------------|
| H | 3.26160300  | -1.30554500 | 1.31543700  |
| H | 3.69105700  | -2.31585500 | -0.08725400 |
| C | 5.32781200  | 0.46610000  | 1.14574200  |
| H | 5.85066500  | 1.32364300  | 0.71193100  |
| H | 4.48777500  | 0.83057100  | 1.75301200  |
| H | 6.01879100  | -0.07196900 | 1.80853200  |
| C | 5.93709800  | -0.95953500 | -0.84653700 |
| H | 5.52735400  | -1.60071500 | -1.63844100 |
| H | 6.46242500  | -0.11832600 | -1.30784000 |
| H | 6.65605000  | -1.55310700 | -0.26562700 |
| C | -0.29085600 | 0.35166600  | -0.36368100 |
| H | 0.06129000  | -0.69117600 | -0.43636300 |
| H | -1.01816000 | 0.47432600  | -1.18432000 |
| C | 1.43542600  | 3.25243100  | -3.03922800 |
| H | 1.01544700  | 3.86709500  | -2.23042600 |
| H | 1.26515900  | 3.78449900  | -3.98176800 |
| H | 0.53739100  | 2.34323300  | -0.38200200 |
| H | -2.17831500 | -1.10540300 | 0.41614100  |

### 1c

|                                  |              |
|----------------------------------|--------------|
| M06 SCF energy (au)              | -1244.899238 |
| M06 enthalpy (au)                | -1244.387066 |
| M06 free energy (au)             | -1244.483171 |
| M06 SCF energy in solution (au)  | -1245.279594 |
| M06 enthalpy in solution (au)    | -1244.767422 |
| M06 free energy in solution (au) | -1244.863527 |

### Cartesian coordinates

| ATOM | X           | Y           | Z           |
|------|-------------|-------------|-------------|
| C    | -0.03744700 | 0.34613100  | 2.04423800  |
| O    | -0.00331600 | 1.56095900  | 2.12785500  |
| N    | -0.80523400 | -0.45987400 | 2.84486400  |
| C    | -1.65187000 | -0.08432100 | 3.88666800  |
| C    | -2.31125700 | -1.16602200 | 4.55278000  |
| C    | -1.88463700 | 1.21257700  | 4.29716000  |
| C    | -3.19693700 | -0.88687400 | 5.62774200  |
| C    | -2.76743700 | 1.46600800  | 5.36749200  |
| H    | -1.38226700 | 2.02630800  | 3.78596000  |
| C    | -2.65849500 | -3.42614700 | 4.72457200  |
| C    | -3.82011200 | -1.99357800 | 6.24660800  |
| C    | -3.41503900 | 0.45181400  | 6.02629000  |
| H    | -2.93125600 | 2.49936200  | 5.66858200  |
| C    | -3.55611500 | -3.26336300 | 5.80089000  |
| H    | -4.50676800 | -1.81790300 | 7.07531100  |
| H    | -4.09622100 | 0.65670600  | 6.85174000  |
| H    | -4.02121000 | -4.13403800 | 6.25755700  |
| N    | -2.05660600 | -2.42715400 | 4.11971500  |
| H    | -2.43353100 | -4.42837200 | 4.35343700  |
| C    | 0.96371300  | 0.31884800  | -0.24519900 |
| H    | 1.19398100  | 1.38313500  | -0.15748600 |
| C    | 0.81383600  | -0.23641400 | -1.44619200 |
| H    | 0.57393700  | -1.30458400 | -1.51222400 |
| C    | 0.98321500  | 0.47822900  | -2.74735200 |
| H    | 0.05137100  | 0.42136500  | -3.33653500 |
| H    | 1.16027700  | 1.54713400  | -2.55337500 |
| C    | 2.48772600  | 1.95077200  | -5.02270200 |
| H    | 1.64707700  | 2.50470200  | -4.58726300 |
| H    | 3.38051400  | 2.19084000  | -4.42595300 |
| N    | 2.67969700  | 2.46950400  | -6.36077200 |
| H    | 3.56847900  | 2.34989300  | -6.82687800 |

|   |             |             |              |
|---|-------------|-------------|--------------|
| C | 1.60894400  | 2.78696900  | -7.14364200  |
| O | 0.45828000  | 2.80847000  | -6.75217000  |
| O | 2.03664400  | 3.08148700  | -8.38763800  |
| C | 1.08993900  | 3.49258900  | -9.41401800  |
| C | 1.98257500  | 3.72412800  | -10.62099600 |
| H | 1.37996900  | 4.04520100  | -11.48025600 |
| H | 2.72714400  | 4.50154600  | -10.40758600 |
| H | 2.51271600  | 2.80230100  | -10.89255100 |
| C | 0.40077200  | 4.78529700  | -9.00896700  |
| H | -0.24617100 | 4.63562400  | -8.13962400  |
| H | 1.14774000  | 5.55359000  | -8.76886700  |
| H | -0.20928000 | 5.15303300  | -9.84508300  |
| C | 0.09754700  | 2.37623100  | -9.69591800  |
| H | 0.63085500  | 1.44751800  | -9.93938900  |
| H | -0.55383200 | 2.19677700  | -8.83571700  |
| H | -0.52385700 | 2.64784600  | -10.55991700 |
| C | 0.82160800  | -0.41683000 | 1.04822500   |
| H | 1.80954400  | -0.52822700 | 1.52840800   |
| H | 0.44194000  | -1.43494800 | 0.87888800   |
| C | 2.12226400  | -0.11226800 | -3.58048600  |
| H | 1.99237000  | -1.20467100 | -3.63746700  |
| H | 3.07476400  | 0.04914600  | -3.04823200  |
| C | 2.21214500  | 0.45332600  | -4.99135900  |
| H | 3.00729200  | -0.06646300 | -5.54883900  |
| H | 1.27251100  | 0.26656200  | -5.53557800  |
| H | -0.78289000 | -1.46805700 | 2.70753800   |

## 2c

|                                  |              |
|----------------------------------|--------------|
| M06 SCF energy (au)              | -1244.938225 |
| M06 enthalpy (au)                | -1244.423459 |
| M06 free energy (au)             | -1244.506548 |
| M06 SCF energy in solution (au)  | -1245.306451 |
| M06 enthalpy in solution (au)    | -1244.791685 |
| M06 free energy in solution (au) | -1244.874774 |

## Cartesian coordinates

| ATOM | X           | Y           | Z           |
|------|-------------|-------------|-------------|
| C    | -1.99449000 | 1.85789200  | -0.35525500 |
| O    | -2.35380600 | 2.95993100  | 0.02908500  |
| N    | -2.35255700 | 0.67903400  | 0.24615300  |
| C    | -3.16613000 | 0.48606600  | 1.36240600  |
| C    | -3.20051800 | -0.85377400 | 1.86263600  |
| C    | -3.92574600 | 1.46265700  | 1.97325100  |
| C    | -4.00376300 | -1.15413200 | 2.99478300  |
| C    | -4.71489800 | 1.14292900  | 3.09759600  |
| H    | -3.90270600 | 2.47410700  | 1.58175200  |
| C    | -2.47952500 | -3.02202100 | 1.67524100  |
| C    | -3.99628500 | -2.49272400 | 3.44700700  |
| C    | -4.76043200 | -0.12962000 | 3.60836300  |
| H    | -5.29947600 | 1.93526200  | 3.56182100  |
| C    | -3.23716900 | -3.42947800 | 2.79376400  |
| H    | -4.59984200 | -2.76096800 | 4.31459400  |
| H    | -5.37141300 | -0.36847200 | 4.47835100  |
| H    | -3.21154800 | -4.46699500 | 3.11886200  |
| N    | -2.45479000 | -1.78942400 | 1.22110500  |
| H    | -1.87037700 | -3.75231400 | 1.13834100  |
| C    | 0.30780900  | 2.25384200  | -1.24666200 |
| H    | 0.18075600  | 3.27598100  | -0.85919700 |
| C    | 1.07501100  | 1.43059000  | -0.20400900 |
| H    | 0.39726100  | 1.23053600  | 0.63444900  |

|   |             |             |             |
|---|-------------|-------------|-------------|
| C | 1.58589000  | 0.08632200  | -0.72386400 |
| H | 1.88726300  | -0.52064300 | 0.14388300  |
| H | 0.76275700  | -0.45683600 | -1.21252500 |
| C | 3.37859700  | 2.35573600  | -0.49526400 |
| H | 4.12728500  | 2.89106400  | 0.09527600  |
| H | 3.14724200  | 2.99222200  | -1.37016100 |
| N | 2.19603500  | 2.20082800  | 0.34448500  |
| C | 1.98706300  | 3.16232500  | 1.30715500  |
| O | 2.79629300  | 4.02629400  | 1.58835500  |
| O | 0.78999500  | 2.99233500  | 1.89315300  |
| C | 0.27065300  | 3.97262700  | 2.83874100  |
| C | -1.07512800 | 3.38121700  | 3.21729000  |
| H | -1.59054100 | 4.03994200  | 3.92874700  |
| H | -1.69892200 | 3.26763300  | 2.32191400  |
| H | -0.94971800 | 2.39479100  | 3.68416400  |
| C | 0.08069000  | 5.30088100  | 2.12656700  |
| H | 1.04021700  | 5.72809500  | 1.81734700  |
| H | -0.55767500 | 5.15745800  | 1.24337200  |
| H | -0.41932400 | 6.01223500  | 2.79762700  |
| C | 1.17077200  | 4.08012100  | 4.05791800  |
| H | 1.33677600  | 3.08549400  | 4.49316300  |
| H | 2.13856200  | 4.52230700  | 3.80746000  |
| H | 0.67754700  | 4.70357200  | 4.81623100  |
| C | -1.08168700 | 1.69946500  | -1.55428900 |
| H | -1.03067100 | 0.65485000  | -1.89443600 |
| H | -1.53157500 | 2.28200100  | -2.36883500 |
| C | 2.77891500  | 0.22581500  | -1.66098700 |
| H | 2.48375700  | 0.75200600  | -2.58409300 |
| H | 3.13275300  | -0.76678200 | -1.97168300 |
| C | 3.88655200  | 1.00354900  | -0.96375100 |
| H | 4.24104300  | 0.43242300  | -0.09103200 |
| H | 4.74845300  | 1.14905800  | -1.62943600 |
| H | 0.88334600  | 2.33535500  | -2.18029600 |
| H | -1.94066100 | -0.19113200 | -0.08577900 |

### 1d

|                                  |              |
|----------------------------------|--------------|
| M06 SCF energy (au)              | -1284.179769 |
| M06 enthalpy (au)                | -1283.637917 |
| M06 free energy (au)             | -1283.735865 |
| M06 SCF energy in solution (au)  | -1284.571969 |
| M06 enthalpy in solution (au)    | -1284.030117 |
| M06 free energy in solution (au) | -1284.128065 |

### Cartesian coordinates

| ATOM | X           | Y           | Z          |
|------|-------------|-------------|------------|
| C    | -0.01004200 | 0.57754100  | 1.57550200 |
| O    | -0.47697600 | 1.68001900  | 1.35037300 |
| N    | -0.59930300 | -0.35647200 | 2.38862500 |
| C    | -1.78516900 | -0.24241300 | 3.11244700 |
| C    | -2.13565400 | -1.39171900 | 3.89012700 |
| C    | -2.60871600 | 0.86498200  | 3.12321400 |
| C    | -3.32808500 | -1.37388800 | 4.66237100 |
| C    | -3.78729300 | 0.86048700  | 3.89795600 |
| H    | -2.33662600 | 1.73092800  | 2.53004500 |
| C    | -1.61507200 | -3.52100300 | 4.56295500 |
| C    | -3.62329700 | -2.53642800 | 5.40922200 |
| C    | -4.15135800 | -0.22479000 | 4.65404400 |
| H    | -4.41672600 | 1.74876800  | 3.88641400 |
| C    | -2.77292400 | -3.61148300 | 5.36403900 |
| H    | -4.53030700 | -2.55964600 | 6.01410100 |

|   |             |             |              |
|---|-------------|-------------|--------------|
| H | -5.06404300 | -0.22016400 | 5.24928400   |
| H | -2.97430700 | -4.51939600 | 5.92797800   |
| N | -1.30074800 | -2.46128900 | 3.85287500   |
| H | -0.92391900 | -4.36511600 | 4.51221500   |
| C | 1.54984000  | 0.68776800  | -0.37237800  |
| H | 1.33066200  | 1.75135300  | -0.49047100  |
| C | 1.97715200  | -0.02518200 | -1.41263100  |
| H | 2.17270000  | -1.09609100 | -1.28027000  |
| C | 2.18857400  | 0.51455300  | -2.78960000  |
| H | 1.98489000  | 1.59743000  | -2.79854300  |
| H | 3.24598100  | 0.39657500  | -3.08416100  |
| C | 0.90588400  | 0.18434800  | -7.67935800  |
| H | 0.68100700  | 1.26007300  | -7.71684200  |
| H | 1.96111900  | 0.06489600  | -7.95829500  |
| N | 0.11689200  | -0.47840800 | -8.69675000  |
| H | -0.84978200 | -0.21882600 | -8.83639700  |
| C | 0.51745400  | -1.67394600 | -9.21605700  |
| O | 1.59882200  | -2.18535600 | -8.99878200  |
| O | -0.45769400 | -2.16940200 | -10.00413300 |
| C | -0.26585600 | -3.42900900 | -10.70790700 |
| C | -1.57739100 | -3.60006500 | -11.45472800 |
| H | -1.56129400 | -4.52957900 | -12.03809300 |
| H | -2.41958600 | -3.64429800 | -10.75240700 |
| H | -1.74337300 | -2.76041100 | -12.14158700 |
| C | -0.06924700 | -4.56439300 | -9.71638900  |
| H | 0.87267600  | -4.45703800 | -9.17062700  |
| H | -0.89809900 | -4.58619500 | -8.99618400  |
| H | -0.06039400 | -5.52243600 | -10.25350400 |
| C | 0.89069100  | -3.31467100 | -11.68735000 |
| H | 0.73496000  | -2.46012000 | -12.35921800 |
| H | 1.84267000  | -3.18583400 | -11.16409900 |
| H | 0.94364900  | -4.22460700 | -12.30025800 |
| C | 1.32430300  | 0.13348700  | 0.99719000   |
| H | 2.09461900  | 0.51415200  | 1.69061200   |
| H | 1.42207800  | -0.96194300 | 0.99695200   |
| C | 0.67970300  | -0.36083800 | -6.27756700  |
| H | -0.38660200 | -0.26618500 | -6.01190200  |
| H | 0.90722300  | -1.43847400 | -6.28381200  |
| C | 1.31471100  | -0.18221300 | -3.82961000  |
| H | 0.25530000  | -0.06488000 | -3.54865200  |
| H | 1.51397400  | -1.26727900 | -3.80904700  |
| C | 1.53547100  | 0.34509600  | -5.23840800  |
| H | 1.32712000  | 1.42927000  | -5.25942300  |
| H | 2.60044400  | 0.23866600  | -5.50777900  |
| H | -0.14829900 | -1.25910400 | 2.52182800   |

## 2d

|                                  |              |
|----------------------------------|--------------|
| M06 SCF energy (au)              | -1284.207114 |
| M06 enthalpy (au)                | -1283.662831 |
| M06 free energy (au)             | -1283.753666 |
| M06 SCF energy in solution (au)  | -1284.587341 |
| M06 enthalpy in solution (au)    | -1284.043058 |
| M06 free energy in solution (au) | -1284.133893 |

## Cartesian coordinates

| ATOM | X           | Y           | Z          |
|------|-------------|-------------|------------|
| C    | -0.52344000 | 0.29247300  | 2.19416100 |
| O    | -0.28020100 | 1.38441900  | 2.67816600 |
| N    | -0.59818700 | -0.86857600 | 2.92278400 |
| C    | -0.45210500 | -1.03457900 | 4.29833400 |



|   |             |             |             |
|---|-------------|-------------|-------------|
| C | -0.60745100 | -2.37750700 | 4.76901400  |
| C | -0.17718900 | -0.02478000 | 5.19841600  |
| C | -0.47571400 | -2.64984400 | 6.15697800  |
| C | -0.05201000 | -0.31846600 | 6.57210000  |
| H | -0.05883400 | 0.98942900  | 4.83323100  |
| C | -1.01925400 | -4.57884700 | 4.27624800  |
| C | -0.63789100 | -3.99335900 | 6.56320400  |
| C | -0.19495700 | -1.59466900 | 7.05484500  |
| H | 0.16519200  | 0.49903300  | 7.25764700  |
| C | -0.90889200 | -4.96107900 | 5.63001500  |
| H | -0.54354200 | -4.24032200 | 7.62115000  |
| H | -0.09554700 | -1.81296600 | 8.11778100  |
| H | -1.03821900 | -6.00323200 | 5.91311800  |
| N | -0.87682700 | -3.34307700 | 3.85381700  |
| H | -1.23457600 | -5.33281100 | 3.51601200  |
| C | -0.08409400 | 1.13418800  | -0.13340000 |
| H | 0.99724100  | 1.01757500  | 0.01788100  |
| C | -0.35924500 | 0.98036300  | -1.62953600 |
| H | -0.06518100 | -0.04470100 | -1.90008600 |
| C | -1.83312600 | 1.12384300  | -2.01912000 |
| H | -1.91532200 | 1.09694300  | -3.11774800 |
| H | -2.33425300 | 0.20768500  | -1.67230100 |
| C | 0.09849900  | 3.10095100  | -3.01960900 |
| H | -0.44413000 | 2.89753100  | -3.96084400 |
| H | 1.00416800  | 3.64184700  | -3.30030500 |
| N | 0.53994200  | 1.85084100  | -2.40780500 |
| C | 1.79539300  | 1.34263900  | -2.62021700 |
| O | 2.18060300  | 0.28664700  | -2.14630000 |
| O | 2.53841100  | 2.14195500  | -3.41130200 |
| C | 3.92284500  | 1.80256300  | -3.71036100 |
| C | 4.37004300  | 2.96601300  | -4.57937700 |
| H | 5.41437600  | 2.82732500  | -4.88712200 |
| H | 3.74812700  | 3.03686600  | -5.48083300 |
| H | 4.29279100  | 3.91272600  | -4.02943100 |
| C | 3.99082500  | 0.50277600  | -4.49529800 |
| H | 3.67246400  | -0.34675100 | -3.88487500 |
| H | 3.34924400  | 0.56382300  | -5.38454100 |
| H | 5.02258000  | 0.33230000  | -4.83146700 |
| C | 4.74803800  | 1.75031400  | -2.43511700 |
| H | 4.63256100  | 2.68505200  | -1.87027100 |
| H | 4.44858200  | 0.91238200  | -1.79959500 |
| H | 5.80994400  | 1.63820400  | -2.69257000 |
| C | -0.81182300 | 0.10581800  | 0.71735400  |
| H | -0.55163700 | -0.91397000 | 0.39244600  |
| H | -1.90419500 | 0.19639400  | 0.59522300  |
| C | -0.76462300 | 3.99511700  | -2.13372600 |
| H | -0.36189000 | 4.00079900  | -1.10898100 |
| H | -0.65170300 | 5.02296100  | -2.50907000 |
| C | -2.59425500 | 2.32685500  | -1.46912500 |
| H | -2.42627500 | 2.40991000  | -0.38353400 |
| H | -3.67217600 | 2.14264600  | -1.58912700 |
| C | -2.24787000 | 3.64909100  | -2.13690000 |
| H | -2.59290400 | 3.62348400  | -3.18525700 |
| H | -2.81289400 | 4.45805400  | -1.65101600 |
| H | -0.33666000 | 2.14215400  | 0.22154100  |
| H | -0.79460600 | -1.74478900 | 2.44352400  |

**5a**

M06 SCF energy (au) -1166.374000  
M06 enthalpy (au) -1165.919891

|                                  |              |
|----------------------------------|--------------|
| M06 free energy (au)             | -1166.000770 |
| M06 SCF energy in solution (au)  | -1166.717892 |
| M06 enthalpy in solution (au)    | -1166.263783 |
| M06 free energy in solution (au) | -1166.344662 |

Cartesian coordinates

| ATOM | X           | Y           | Z           |
|------|-------------|-------------|-------------|
| C    | 2.00638400  | 0.09874300  | 1.70608900  |
| O    | 2.69771100  | 1.10136200  | 1.77883300  |
| N    | 0.93591700  | -0.15322600 | 2.52766200  |
| C    | 0.44439900  | 0.63053400  | 3.56920800  |
| C    | -0.70070700 | 0.09942100  | 4.24359400  |
| C    | 0.97482800  | 1.83902200  | 3.97492900  |
| C    | -1.27326500 | 0.82495600  | 5.32208500  |
| C    | 0.38915800  | 2.54199700  | 5.04812600  |
| H    | 1.84351000  | 2.23384100  | 3.45928900  |
| C    | -2.24347700 | -1.58689100 | 4.43038700  |
| C    | -2.40103000 | 0.25176500  | 5.95122300  |
| C    | -0.70838100 | 2.05960400  | 5.71531000  |
| H    | 0.83042900  | 3.49170000  | 5.34599700  |
| C    | -2.89042400 | -0.95141600 | 5.51157700  |
| H    | -2.86716700 | 0.78026000  | 6.78339800  |
| H    | -1.15448300 | 2.60860200  | 6.54410900  |
| H    | -3.75652900 | -1.41683600 | 5.97659100  |
| N    | -1.19347800 | -1.09112400 | 3.81587800  |
| H    | -2.61591100 | -2.54593600 | 4.06381200  |
| C    | 3.43352900  | -0.68980700 | -0.21810200 |
| H    | 4.29667000  | -0.44729600 | 0.41486600  |
| C    | 3.15861300  | 0.40879100  | -1.24716600 |
| H    | 2.46657000  | 1.16692000  | -0.86560300 |
| C    | 2.64164900  | -0.35073400 | -2.46658900 |
| H    | 1.58740600  | -0.63202800 | -2.32672600 |
| H    | 2.70764800  | 0.22432100  | -3.39713900 |
| C    | 3.51255900  | -1.59994900 | -2.48700800 |
| H    | 3.03016700  | -2.46636200 | -2.95455400 |
| H    | 4.46152500  | -1.42330400 | -3.01960600 |
| N    | 3.75463100  | -1.84202600 | -1.06826600 |
| C    | 4.40898600  | -2.91552600 | -0.55186000 |
| O    | 4.64486200  | -3.05483800 | 0.63651500  |
| O    | 4.73969000  | -3.78107700 | -1.53134100 |
| C    | 5.43416700  | -5.02086800 | -1.21455800 |
| C    | 5.59511200  | -5.67317500 | -2.57691700 |
| H    | 6.11808300  | -6.63289000 | -2.47652500 |
| H    | 4.61560900  | -5.85676600 | -3.03665700 |
| H    | 6.17660700  | -5.02813900 | -3.24780800 |
| C    | 4.57817400  | -5.89118900 | -0.30889100 |
| H    | 4.45371700  | -5.43601300 | 0.67790700  |
| H    | 3.58808600  | -6.04638200 | -0.75824900 |
| H    | 5.05430000  | -6.87366200 | -0.18851800 |
| C    | 6.79511900  | -4.72256500 | -0.60708200 |
| H    | 7.36687800  | -4.05730000 | -1.26778500 |
| H    | 6.69712200  | -4.24952800 | 0.37417100  |
| H    | 7.35966500  | -5.65815500 | -0.49531500 |
| C    | 2.25147300  | -0.99845300 | 0.69137500  |
| H    | 2.45603100  | -1.93987200 | 1.22300100  |
| H    | 1.33758500  | -1.16292200 | 0.09643900  |
| H    | 4.09899400  | 0.91984700  | -1.49665400 |
| H    | 0.41085400  | -1.01733000 | 2.40569200  |

AcOH

|                                  |             |
|----------------------------------|-------------|
| M06 SCF energy (au)              | -228.954066 |
| M06 enthalpy (au)                | -228.886374 |
| M06 free energy (au)             | -228.919291 |
| M06 SCF energy in solution (au)  | -229.040586 |
| M06 enthalpy in solution (au)    | -228.972894 |
| M06 free energy in solution (au) | -229.005811 |

Cartesian coordinates

| ATOM | X           | Y           | Z           |
|------|-------------|-------------|-------------|
| C    | -0.17601100 | -0.41767800 | -0.00065500 |
| O    | 1.02813400  | -0.48275900 | 0.00000200  |
| O    | -0.83950700 | 0.75753500  | 0.00011600  |
| H    | -0.15401900 | 1.44871600  | 0.00043100  |
| C    | -1.12763000 | -1.57335500 | -0.00001600 |
| H    | -1.77768600 | -1.52474000 | 0.88103800  |
| H    | -1.77789300 | -1.52547300 | -0.88095400 |
| H    | -0.56848600 | -2.51082100 | 0.00031600  |

**1-AdaCOOH**

|                                  |             |
|----------------------------------|-------------|
| M06 SCF energy (au)              | -578.896680 |
| M06 enthalpy (au)                | -578.627396 |
| M06 free energy (au)             | -578.673605 |
| M06 SCF energy in solution (au)  | -579.075351 |
| M06 enthalpy in solution (au)    | -578.806067 |
| M06 free energy in solution (au) | -578.852276 |

Cartesian coordinates

| ATOM | X           | Y           | Z           |
|------|-------------|-------------|-------------|
| C    | -0.32160000 | -0.12471400 | -0.00734900 |
| H    | 0.78099500  | -0.11169400 | -0.00134200 |
| H    | -0.65917000 | 0.92245500  | -0.00621000 |
| C    | -0.83364400 | -0.83832800 | 1.25996700  |
| C    | -0.83553900 | -0.85116700 | -1.25260600 |
| H    | -0.46001800 | -0.33467300 | -2.14926500 |
| C    | -0.34073600 | -2.29972800 | -1.24388600 |
| H    | 0.76088800  | -2.32353100 | -1.26310700 |
| H    | -0.69001500 | -2.82218600 | -2.14910500 |
| C    | -0.34420100 | -2.29015700 | 1.25450100  |
| H    | -0.68893500 | -2.79658300 | 2.16913900  |
| H    | 0.75607300  | -2.30627300 | 1.28753300  |
| C    | -0.85970900 | -3.01143400 | 0.00845000  |
| H    | -0.50034200 | -4.05164100 | 0.01884600  |
| C    | -2.39084800 | -2.99533300 | 0.00651000  |
| H    | -2.77437900 | -3.52955200 | -0.87773600 |
| H    | -2.77538200 | -3.52366400 | 0.89390000  |
| C    | -2.37543600 | -0.82212700 | 1.24575200  |
| H    | -2.73637200 | 0.21710100  | 1.26189300  |
| H    | -2.75617600 | -1.31342500 | 2.15657800  |
| C    | -2.36684500 | -0.83582200 | -1.25206600 |
| H    | -2.73513200 | 0.20252300  | -1.27824500 |
| H    | -2.74880900 | -1.33617500 | -2.15648400 |
| C    | -2.88823700 | -1.54761700 | -0.00046800 |
| H    | -3.98894800 | -1.53213700 | 0.00340200  |
| C    | -0.32188600 | -0.13283300 | 2.49210100  |
| O    | 0.36964200  | -0.61844900 | 3.35620900  |
| O    | -0.72631300 | 1.15495300  | 2.54755700  |
| H    | -0.34693200 | 1.51234200  | 3.36986800  |

**IM1a**

|                     |              |
|---------------------|--------------|
| M06 SCF energy (au) | -1522.084441 |
|---------------------|--------------|

|                                  |              |
|----------------------------------|--------------|
| M06 enthalpy (au)                | -1521.584160 |
| M06 free energy (au)             | -1521.677904 |
| M06 SCF energy in solution (au)  | -1522.495499 |
| M06 enthalpy in solution (au)    | -1521.995218 |
| M06 free energy in solution (au) | -1522.088962 |

Cartesian coordinates

| ATOM | X           | Y           | Z           |
|------|-------------|-------------|-------------|
| Pd   | -0.36871600 | -2.26416500 | 1.75301000  |
| C    | -1.97212600 | -3.90802400 | -0.06666100 |
| O    | -1.96648400 | -2.95860000 | -0.84091900 |
| O    | -1.29126400 | -3.97796000 | 1.04527300  |
| C    | -2.80032800 | -5.14707900 | -0.33016700 |
| H    | -3.24679400 | -5.10058900 | -1.32698900 |
| H    | -2.18701400 | -6.05089700 | -0.23534400 |
| H    | -3.59892900 | -5.22134800 | 0.41865900  |
| C    | 0.91840800  | 0.36398600  | 1.99775200  |
| O    | 1.46587000  | 1.34080000  | 2.48451100  |
| N    | 0.35194300  | -0.66623900 | 2.70057200  |
| C    | 0.18142100  | -0.69175100 | 4.08329300  |
| C    | -0.61309000 | -1.77123000 | 4.56254600  |
| C    | 0.70068200  | 0.19789600  | 5.01261600  |
| C    | -0.84421400 | -1.96548000 | 5.94518500  |
| C    | 0.45631800  | 0.00843000  | 6.38761300  |
| H    | 1.30359700  | 1.02892100  | 4.66357700  |
| C    | -1.83831800 | -3.68389500 | 4.01014100  |
| C    | -1.61555200 | -3.08903300 | 6.31860000  |
| C    | -0.28757700 | -1.04557000 | 6.86182800  |
| H    | 0.88573200  | 0.72189500  | 7.08920600  |
| C    | -2.10905100 | -3.94397600 | 5.36466400  |
| H    | -1.80541000 | -3.26713100 | 7.37718700  |
| H    | -0.45448100 | -1.18866900 | 7.92845300  |
| H    | -2.69427900 | -4.81893200 | 5.63426200  |
| N    | -1.13282300 | -2.63597000 | 3.63736400  |
| H    | -2.17763300 | -4.33516600 | 3.20521300  |
| C    | 0.45877700  | -1.17806600 | -0.00122200 |
| H    | -0.30656400 | -1.33294900 | -0.76550000 |
| C    | 1.32860200  | -2.21672500 | 0.26521200  |
| H    | 2.18381400  | -2.01589800 | 0.92543700  |
| C    | 1.41739700  | -3.48152700 | -0.53242100 |
| H    | 0.43067500  | -3.73066100 | -0.94219500 |
| H    | 2.06105700  | -3.27391800 | -1.40496800 |
| C    | 2.04263700  | -4.65200300 | 0.22787000  |
| H    | 2.00110900  | -5.55101600 | -0.40317600 |
| H    | 3.10080600  | -4.45045500 | 0.42178800  |
| N    | 1.41677100  | -4.94176200 | 1.50246700  |
| H    | 0.41062300  | -5.09975000 | 1.49054900  |
| C    | 1.86933900  | -4.53163800 | 2.72534500  |
| O    | 1.21531100  | -4.63992100 | 3.74825000  |
| O    | 3.11221200  | -4.02115100 | 2.64212200  |
| C    | 3.80787800  | -3.53548900 | 3.82808900  |
| C    | 5.13676500  | -3.06535700 | 3.26191000  |
| H    | 5.77277900  | -2.67398800 | 4.06595500  |
| H    | 5.66460200  | -3.89334200 | 2.77174500  |
| H    | 4.98142500  | -2.26630600 | 2.52459700  |
| C    | 4.02093000  | -4.67102000 | 4.81452200  |
| H    | 3.06992500  | -5.02542200 | 5.22260500  |
| H    | 4.53280200  | -5.50961800 | 4.32396700  |
| H    | 4.65389200  | -4.32245900 | 5.64166700  |
| C    | 3.05586700  | -2.36694500 | 4.44160200  |

|   |             |             |             |
|---|-------------|-------------|-------------|
| H | 2.85425200  | -1.59783000 | 3.68074500  |
| H | 2.10441500  | -2.68419100 | 4.88142700  |
| H | 3.66810200  | -1.90747700 | 5.22981800  |
| C | 0.71850400  | 0.22230900  | 0.49360000  |
| H | -0.13281500 | 0.86971200  | 0.23987900  |
| H | 1.59225900  | 0.65961200  | -0.00969800 |

### TS5a

|                                  |              |
|----------------------------------|--------------|
| M06 SCF energy (au)              | -1522.038078 |
| M06 enthalpy (au)                | -1521.539447 |
| M06 free energy (au)             | -1521.631395 |
| M06 SCF energy in solution (au)  | -1522.448962 |
| M06 enthalpy in solution (au)    | -1521.950331 |
| M06 free energy in solution (au) | -1522.042279 |

### Cartesian coordinates

| ATOM | X           | Y           | Z           |
|------|-------------|-------------|-------------|
| Pd   | -0.65151500 | -1.75516100 | 1.97419000  |
| C    | -1.21815600 | -4.48302900 | 1.09152000  |
| O    | -1.57460200 | -3.27038700 | 0.87615700  |
| O    | -0.23409600 | -4.84442700 | 1.76034400  |
| C    | -2.12991800 | -5.52206300 | 0.47652400  |
| H    | -2.44989200 | -5.21486200 | -0.52474900 |
| H    | -1.63790600 | -6.49819400 | 0.44058100  |
| H    | -3.03685200 | -5.61152700 | 1.08921300  |
| C    | 1.00343900  | 0.59421800  | 2.41023800  |
| O    | 1.65587900  | 1.46912800  | 2.96576300  |
| N    | 0.12118700  | -0.25672100 | 3.02408600  |
| C    | -0.28208100 | -0.18395200 | 4.34649900  |
| C    | -1.24532500 | -1.16743200 | 4.73837900  |
| C    | 0.13380300  | 0.73373200  | 5.30564600  |
| C    | -1.74966700 | -1.21828500 | 6.06250300  |
| C    | -0.37675800 | 0.67625300  | 6.61674400  |
| H    | 0.85970900  | 1.48875400  | 5.02318800  |
| C    | -2.54882300 | -2.99029800 | 4.09349300  |
| C    | -2.69362900 | -2.22831200 | 6.35722500  |
| C    | -1.29138300 | -0.27315300 | 7.00757300  |
| H    | -0.02386500 | 1.41132800  | 7.33879900  |
| C    | -3.09443400 | -3.11000600 | 5.38470200  |
| H    | -3.09685000 | -2.29143000 | 7.36818400  |
| H    | -1.67354300 | -0.30973400 | 8.02683000  |
| H    | -3.82062900 | -3.89218900 | 5.59048100  |
| N    | -1.66380300 | -2.06245300 | 3.79020400  |
| H    | -2.83962000 | -3.65784400 | 3.28271500  |
| C    | 0.65650400  | -1.05024200 | 0.47506600  |
| H    | -0.02511700 | -1.11879000 | -0.38478300 |
| C    | 1.74774600  | -1.97019100 | 0.32529800  |
| H    | 2.75343500  | -1.56182900 | 0.50156100  |
| C    | 1.74108500  | -3.14333600 | -0.62836400 |
| H    | 0.70906800  | -3.46935800 | -0.81335100 |
| H    | 2.22663300  | -2.93517900 | -1.58928700 |
| C    | 2.47038600  | -4.07638700 | 0.32687900  |
| H    | 2.15452900  | -5.12339600 | 0.34278700  |
| H    | 3.55987700  | -4.00364100 | 0.24933900  |
| N    | 2.04534700  | -3.37239700 | 1.56058400  |
| H    | 1.12493100  | -3.73428200 | 1.90381900  |
| C    | 3.00005900  | -3.05185100 | 2.55724800  |
| O    | 4.16935200  | -2.89400500 | 2.29294200  |
| O    | 2.38240300  | -2.90097800 | 3.71320900  |
| C    | 3.12202700  | -2.44429000 | 4.90797300  |

|   |            |             |            |
|---|------------|-------------|------------|
| C | 2.05492600 | -2.45774200 | 5.98492500 |
| H | 2.49848500 | -2.16908800 | 6.94637000 |
| H | 1.25578200 | -1.74570300 | 5.74725400 |
| H | 1.61894700 | -3.45981800 | 6.08625400 |
| C | 3.64487800 | -1.04014400 | 4.67001600 |
| H | 4.43668300 | -1.02678000 | 3.91398500 |
| H | 2.83870600 | -0.36338200 | 4.35313600 |
| H | 4.06121000 | -0.65110100 | 5.60884300 |
| C | 4.22346100 | -3.43722200 | 5.23564000 |
| H | 3.80965500 | -4.44951900 | 5.33493400 |
| H | 5.00796200 | -3.44398600 | 4.47341300 |
| H | 4.67505100 | -3.16086200 | 6.19743800 |
| C | 1.04355100 | 0.36335200  | 0.90701800 |
| H | 0.32925700 | 1.08104100  | 0.47578400 |
| H | 2.03649800 | 0.66906300  | 0.54277900 |

### IM5a

|                                  |              |
|----------------------------------|--------------|
| M06 SCF energy (au)              | -1522.043576 |
| M06 enthalpy (au)                | -1521.543402 |
| M06 free energy (au)             | -1521.636014 |
| M06 SCF energy in solution (au)  | -1522.454997 |
| M06 enthalpy in solution (au)    | -1521.954823 |
| M06 free energy in solution (au) | -1522.047435 |

### Cartesian coordinates

| ATOM | X           | Y           | Z           |
|------|-------------|-------------|-------------|
| Pd   | -0.68702600 | -1.74521700 | 1.96874900  |
| C    | -1.12415600 | -4.50017000 | 1.11823400  |
| O    | -1.59174500 | -3.32879700 | 0.93123500  |
| O    | -0.03205000 | -4.77614100 | 1.66021100  |
| C    | -2.01410700 | -5.63265600 | 0.65717600  |
| H    | -2.65420300 | -5.32039700 | -0.17348000 |
| H    | -1.41577500 | -6.50535000 | 0.37786200  |
| H    | -2.66647600 | -5.93001000 | 1.48918100  |
| C    | 1.05803300  | 0.52713600  | 2.42621000  |
| O    | 1.78145300  | 1.34084600  | 2.99068800  |
| N    | 0.10641800  | -0.25594500 | 3.02640600  |
| C    | -0.29170900 | -0.17313900 | 4.34760200  |
| C    | -1.28845700 | -1.12392600 | 4.74795300  |
| C    | 0.16035800  | 0.73126300  | 5.30471300  |
| C    | -1.78542400 | -1.14988800 | 6.07669400  |
| C    | -0.34401100 | 0.69630400  | 6.61843100  |
| H    | 0.91148100  | 1.45920500  | 5.01630000  |
| C    | -2.64990700 | -2.90845800 | 4.12644900  |
| C    | -2.76109500 | -2.12612500 | 6.38401500  |
| C    | -1.29002400 | -0.21878600 | 7.01681300  |
| H    | 0.03826000  | 1.42098400  | 7.33627800  |
| C    | -3.19507700 | -3.00170400 | 5.42070600  |
| H    | -3.16045600 | -2.16775900 | 7.39778000  |
| H    | -1.66856600 | -0.23881300 | 8.03802600  |
| H    | -3.94594900 | -3.75776300 | 5.63643100  |
| N    | -1.73862300 | -2.01204100 | 3.80907900  |
| H    | -2.96363100 | -3.57469300 | 3.32194500  |
| C    | 0.64387500  | -1.11712000 | 0.51100600  |
| H    | 0.07903300  | -1.11139600 | -0.43345600 |
| C    | 1.80330700  | -2.04573600 | 0.32237900  |
| H    | 2.77308800  | -1.52118200 | 0.28969000  |
| C    | 1.78555700  | -3.16722200 | -0.71748700 |
| H    | 0.76428600  | -3.53336000 | -0.87934600 |
| H    | 2.25953900  | -2.94624900 | -1.67776400 |

|   |            |             |            |
|---|------------|-------------|------------|
| C | 2.55612400 | -4.04106500 | 0.26761900 |
| H | 2.24694700 | -5.07866400 | 0.41305200 |
| H | 3.64326100 | -3.94431900 | 0.18915400 |
| N | 2.08321500 | -3.17111200 | 1.40343500 |
| H | 1.16316400 | -3.57724300 | 1.74946300 |
| C | 3.02264300 | -2.84125000 | 2.47224400 |
| O | 4.17897300 | -2.62803900 | 2.22069600 |
| O | 2.37722700 | -2.82047100 | 3.60633000 |
| C | 3.07995500 | -2.47645300 | 4.87393900 |
| C | 1.96955600 | -2.57880500 | 5.89884600 |
| H | 2.37841300 | -2.39385000 | 6.90018600 |
| H | 1.19126000 | -1.83266200 | 5.70074600 |
| H | 1.51610500 | -3.57798000 | 5.88309600 |
| C | 3.62361200 | -1.06486500 | 4.77912400 |
| H | 4.46370500 | -0.99786200 | 4.08020400 |
| H | 2.84529200 | -0.35556500 | 4.46441800 |
| H | 3.97833700 | -0.75966000 | 5.77250700 |
| C | 4.15667700 | -3.51395200 | 5.13078300 |
| H | 3.72685400 | -4.52425400 | 5.13633200 |
| H | 4.95786300 | -3.46615100 | 4.38658800 |
| H | 4.59575400 | -3.32807600 | 6.11947100 |
| C | 1.06971200 | 0.29726900  | 0.92365200 |
| H | 0.35069400 | 1.02249500  | 0.51172500 |
| H | 2.05742300 | 0.59174700  | 0.53292000 |

#### TS8a

|                                  |              |
|----------------------------------|--------------|
| M06 SCF energy (au)              | -1522.043109 |
| M06 enthalpy (au)                | -1521.548127 |
| M06 free energy (au)             | -1521.640874 |
| M06 SCF energy in solution (au)  | -1522.456242 |
| M06 enthalpy in solution (au)    | -1521.961260 |
| M06 free energy in solution (au) | -1522.054007 |

#### Cartesian coordinates

| ATOM | X           | Y           | Z          |
|------|-------------|-------------|------------|
| Pd   | -0.44612000 | -1.71912300 | 2.31197600 |
| C    | -0.60544900 | -4.62633900 | 1.25597700 |
| O    | -1.08095900 | -3.70211100 | 1.96749000 |
| O    | 0.51272700  | -4.62394200 | 0.66458600 |
| C    | -1.43766300 | -5.87771600 | 1.12968200 |
| H    | -2.50326600 | -5.65048000 | 1.22589800 |
| H    | -1.23436700 | -6.38062800 | 0.17960400 |
| H    | -1.16168600 | -6.56679700 | 1.93880700 |
| C    | 0.36330200  | 0.99084500  | 1.65437000 |
| O    | 0.67533400  | 2.17011100  | 1.73221200 |
| N    | -0.01979700 | 0.18315000  | 2.69991900 |
| C    | -0.24207400 | 0.59951900  | 4.00093100 |
| C    | -0.87006900 | -0.36151400 | 4.86098600 |
| C    | 0.07090700  | 1.84251800  | 4.54091700 |
| C    | -1.13523900 | -0.06064800 | 6.22377900 |
| C    | -0.20768600 | 2.12988700  | 5.88950900 |
| H    | 0.52973100  | 2.58473500  | 3.89669600 |
| C    | -1.78289100 | -2.49453000 | 5.08180600 |
| C    | -1.73548400 | -1.07428600 | 7.00504400 |
| C    | -0.79078300 | 1.21106700  | 6.73054100 |
| H    | 0.05725900  | 3.11511600  | 6.27115400 |
| C    | -2.06204300 | -2.28478500 | 6.44542600 |
| H    | -1.93955100 | -0.87244900 | 8.05711500 |
| H    | -0.99322400 | 1.44251200  | 7.77557400 |
| H    | -2.53395800 | -3.07200200 | 7.02851200 |

|   |             |             |             |
|---|-------------|-------------|-------------|
| N | -1.20234300 | -1.57971800 | 4.33168900  |
| H | -2.03252500 | -3.43131800 | 4.58076100  |
| C | 0.46737200  | -1.27874500 | 0.52926600  |
| H | -0.00851700 | -1.85693400 | -0.27741900 |
| C | 1.93296400  | -1.59518800 | 0.59972600  |
| H | 2.48706300  | -0.83793000 | 1.17465700  |
| C | 2.70762900  | -2.01379400 | -0.66588100 |
| H | 2.03110500  | -2.41550600 | -1.43045400 |
| H | 3.36893300  | -1.26705100 | -1.11381000 |
| C | 3.36070100  | -3.11111600 | 0.16752400  |
| H | 3.39002300  | -4.13110600 | -0.22851100 |
| H | 4.32999200  | -2.82434300 | 0.58902500  |
| N | 2.29633100  | -2.95406500 | 1.22311100  |
| H | 1.41080300  | -3.70079600 | 1.03726500  |
| C | 2.75583000  | -2.92398600 | 2.60475700  |
| O | 3.66026700  | -2.20992700 | 2.95015800  |
| O | 2.05713900  | -3.78238500 | 3.30815800  |
| C | 2.26546900  | -3.92250800 | 4.76521200  |
| C | 1.17302400  | -4.90187200 | 5.14741500  |
| H | 1.22588500  | -5.11890300 | 6.22174100  |
| H | 0.18631000  | -4.47683000 | 4.92138500  |
| H | 1.28240100  | -5.84277600 | 4.59314900  |
| C | 2.06110600  | -2.58548100 | 5.45298200  |
| H | 2.87077800  | -1.88157400 | 5.23841300  |
| H | 1.11057100  | -2.13787300 | 5.13635700  |
| H | 2.01721600  | -2.74805200 | 6.53831300  |
| C | 3.64427400  | -4.50551800 | 5.00968500  |
| H | 3.76422400  | -5.45495000 | 4.47172400  |
| H | 4.43360900  | -3.81309500 | 4.69878400  |
| H | 3.76480800  | -4.70515300 | 6.08244100  |
| C | 0.29050700  | 0.22972900  | 0.33666000  |
| H | -0.70561100 | 0.43236400  | -0.08423200 |
| H | 1.01536100  | 0.67350800  | -0.36709600 |

### IM3a

|                                  |              |
|----------------------------------|--------------|
| M06 SCF energy (au)              | -1871.994271 |
| M06 enthalpy (au)                | -1871.292784 |
| M06 free energy (au)             | -1871.397283 |
| M06 SCF energy in solution (au)  | -1872.497689 |
| M06 enthalpy in solution (au)    | -1871.796202 |
| M06 free energy in solution (au) | -1871.900701 |

### Cartesian coordinates

| ATOM | X           | Y           | Z          |
|------|-------------|-------------|------------|
| Pd   | -0.69089500 | -1.81792900 | 2.24503300 |
| C    | -1.23964300 | -4.62719600 | 1.34340800 |
| O    | -1.51089100 | -3.45170400 | 1.08343300 |
| O    | -0.19327100 | -4.97988700 | 2.05785000 |
| C    | 0.79374600  | 0.61432000  | 2.78873000 |
| O    | 1.24097500  | 1.60600600  | 3.35045500 |
| N    | -0.05140400 | -0.30855800 | 3.35746000 |
| C    | -0.53233500 | -0.26090100 | 4.65570300 |
| C    | -1.46439800 | -1.29087000 | 5.01449300 |
| C    | -0.19615300 | 0.67048000  | 5.63487900 |
| C    | -2.00906800 | -1.36149500 | 6.32495600 |
| C    | -0.74074200 | 0.58458600  | 6.92913800 |
| H    | 0.49077700  | 1.46831000  | 5.37544800 |
| C    | -2.68177100 | -3.15545900 | 4.34082700 |
| C    | -2.92441800 | -2.40353700 | 6.59360900 |
| C    | -1.62585900 | -0.40352900 | 7.28804800 |



|   |             |             |             |
|---|-------------|-------------|-------------|
| H | -0.44347500 | 1.33339400  | 7.66219800  |
| C | -3.26651900 | -3.29905500 | 5.61158800  |
| H | -3.35425600 | -2.47862600 | 7.59279500  |
| H | -2.04166100 | -0.46088700 | 8.29313800  |
| H | -3.97242300 | -4.10518300 | 5.79549900  |
| N | -1.81889300 | -2.20139300 | 4.05630900  |
| H | -2.93320500 | -3.83854700 | 3.52636300  |
| C | 0.63885600  | -1.08619300 | 0.85584000  |
| H | 0.04773100  | -0.98655300 | -0.06893000 |
| C | 1.75967100  | -2.07013000 | 0.57810100  |
| H | 2.72156500  | -1.53474800 | 0.47490000  |
| C | 1.59395200  | -3.09569100 | -0.55871400 |
| H | 0.53220400  | -3.30467400 | -0.74853200 |
| H | 2.09565100  | -2.87344000 | -1.50503400 |
| C | 2.24198700  | -4.14104200 | 0.35881500  |
| H | 1.77338700  | -5.12930200 | 0.44262300  |
| H | 3.32041700  | -4.27627400 | 0.19137300  |
| N | 1.97789300  | -3.23575800 | 1.49312400  |
| H | 0.41200900  | -4.19169900 | 2.16598400  |
| C | 2.76189600  | -3.26664800 | 2.63578600  |
| O | 3.18299400  | -4.31205200 | 3.08853100  |
| O | 2.92735500  | -2.03918100 | 3.12701400  |
| C | 3.55574000  | -1.84635400 | 4.44074800  |
| C | 3.56831200  | -0.33919000 | 4.60731300  |
| H | 4.09284100  | -0.07761200 | 5.53563100  |
| H | 4.09036300  | 0.13958700  | 3.76814000  |
| H | 2.55574000  | 0.07826400  | 4.65080700  |
| C | 4.97740700  | -2.38464600 | 4.42739200  |
| H | 5.00027800  | -3.47181000 | 4.31531500  |
| H | 5.54698000  | -1.92833300 | 3.60660200  |
| H | 5.47104500  | -2.11410000 | 5.37038100  |
| C | 2.69150100  | -2.50014200 | 5.50467200  |
| H | 1.66049000  | -2.12316600 | 5.43649300  |
| H | 2.68493400  | -3.59057000 | 5.40405800  |
| H | 3.08055100  | -2.24372300 | 6.49915900  |
| C | 1.10118400  | 0.29225400  | 1.34062400  |
| H | 0.62269900  | 1.08878300  | 0.75019100  |
| H | 2.18498000  | 0.44208300  | 1.20663000  |
| C | -2.05887600 | -5.77839400 | 0.82531200  |
| C | -2.29939800 | -6.82977200 | 1.92459700  |
| C | -3.40436200 | -5.28679500 | 0.27908000  |
| C | -1.25900300 | -6.43796600 | -0.32233500 |
| H | -2.85006200 | -6.37020200 | 2.76286000  |
| H | -1.33731600 | -7.17862300 | 2.32557800  |
| C | -3.09688400 | -8.00228400 | 1.34822800  |
| H | -3.23381200 | -4.52546200 | -0.49596000 |
| H | -3.97242700 | -4.79159300 | 1.08356900  |
| C | -4.19679700 | -6.46533500 | -0.28943900 |
| H | -0.28606300 | -6.78466300 | 0.05949800  |
| H | -1.06016700 | -5.68881600 | -1.10742300 |
| C | -2.05693800 | -7.61171100 | -0.89510600 |
| H | -3.26622900 | -8.74266300 | 2.14435600  |
| C | -4.43986000 | -7.49972000 | 0.81256600  |
| C | -2.30046600 | -8.64463500 | 0.20863500  |
| H | -5.16003900 | -6.09740600 | -0.67299900 |
| C | -3.40050300 | -7.10795100 | -1.42854800 |
| H | -1.47872500 | -8.06920100 | -1.71192000 |
| H | -5.03011900 | -7.05196800 | 1.62842600  |
| H | -5.02730100 | -8.34340800 | 0.41702100  |
| H | -1.34016200 | -9.02953100 | 0.58717700  |

|   |             |             |             |
|---|-------------|-------------|-------------|
| H | -2.85432800 | -9.50517300 | -0.19857200 |
| H | -3.96949100 | -7.94539200 | -1.86232900 |
| H | -3.23824500 | -6.37650800 | -2.23631400 |

### TS3a

|                                  |              |
|----------------------------------|--------------|
| M06 SCF energy (au)              | -1871.960522 |
| M06 enthalpy (au)                | -1871.264145 |
| M06 free energy (au)             | -1871.370137 |
| M06 SCF energy in solution (au)  | -1872.462765 |
| M06 enthalpy in solution (au)    | -1871.766388 |
| M06 free energy in solution (au) | -1871.872380 |

### Cartesian coordinates

| ATOM | X           | Y           | Z           |
|------|-------------|-------------|-------------|
| Pd   | -0.60767800 | -1.64705000 | 2.69252600  |
| C    | -0.97598900 | -3.68850600 | 0.75788600  |
| O    | -0.76623100 | -3.61014700 | 2.01142700  |
| O    | -1.06551100 | -2.67281400 | 0.02005200  |
| C    | 0.04747700  | 1.19761000  | 2.77376900  |
| O    | 0.28628100  | 2.31487100  | 3.20887200  |
| N    | -0.46074300 | 0.15661000  | 3.51091900  |
| C    | -0.80065400 | 0.21756800  | 4.85517500  |
| C    | -1.23551300 | -1.01846600 | 5.41609400  |
| C    | -0.77369300 | 1.32897000  | 5.68861800  |
| C    | -1.63389700 | -1.12588400 | 6.77186100  |
| C    | -1.17138700 | 1.21688900  | 7.03513700  |
| H    | -0.44116500 | 2.27772900  | 5.28267200  |
| C    | -1.63753500 | -3.29182700 | 5.03733900  |
| C    | -2.04500700 | -2.39972100 | 7.22351900  |
| C    | -1.59526900 | 0.02892400  | 7.58342200  |
| H    | -1.13767700 | 2.11133700  | 7.65539700  |
| C    | -2.04853500 | -3.47584900 | 6.36919000  |
| H    | -2.35807400 | -2.51314300 | 8.26157800  |
| H    | -1.89832200 | -0.04059300 | 8.62705300  |
| H    | -2.36090300 | -4.46270000 | 6.70049000  |
| N    | -1.25077000 | -2.11119100 | 4.59091700  |
| H    | -1.61640400 | -4.10679500 | 4.31414500  |
| C    | 0.41736100  | -0.64833400 | 0.98177900  |
| H    | 0.27203000  | -0.71810500 | -0.11235500 |
| C    | 1.81213000  | -1.22478300 | 1.17136800  |
| H    | 1.76830700  | -2.31989300 | 1.02823900  |
| C    | 2.69797600  | -0.81718600 | 2.37011900  |
| H    | 2.32645600  | 0.05795500  | 2.91394300  |
| H    | 2.91577800  | -1.61247300 | 3.08976200  |
| C    | 3.81257000  | -0.46980900 | 1.36440700  |
| H    | 4.23796300  | 0.53938200  | 1.42450900  |
| H    | 4.63418800  | -1.19877700 | 1.31679200  |
| N    | 2.83799300  | -0.64521800 | 0.28486300  |
| H    | -0.56718900 | -1.61033500 | 0.76786600  |
| C    | 3.04340800  | -1.07859400 | -0.99245300 |
| O    | 2.18966600  | -1.65417000 | -1.64362600 |
| O    | 4.28478200  | -0.76158700 | -1.39523300 |
| C    | 4.71692500  | -1.04625900 | -2.75797000 |
| C    | 6.13390700  | -0.50070100 | -2.78228500 |
| H    | 6.58106300  | -0.65639600 | -3.77244100 |
| H    | 6.13769600  | 0.57436400  | -2.56271200 |
| H    | 6.75694000  | -1.00825300 | -2.03490900 |
| C    | 3.84319100  | -0.30023200 | -3.75257600 |
| H    | 2.81721200  | -0.67990200 | -3.74528200 |
| H    | 3.82810000  | 0.77156200  | -3.51438300 |

|   |             |             |             |
|---|-------------|-------------|-------------|
| H | 4.25671300  | -0.41847500 | -4.76316100 |
| C | 4.72039800  | -2.54571700 | -3.00528400 |
| H | 5.32239300  | -3.05462600 | -2.24058400 |
| H | 3.70555100  | -2.95357900 | -2.98872600 |
| H | 5.16965000  | -2.75436700 | -3.98561900 |
| C | 0.24804600  | 0.83169400  | 1.31776200  |
| H | -0.63115600 | 1.22361300  | 0.78393700  |
| H | 1.10559500  | 1.40658700  | 0.93602200  |
| C | -1.00766800 | -5.06214400 | 0.12533200  |
| C | -1.50856100 | -6.14085600 | 1.09348500  |
| C | -1.86481400 | -5.07313900 | -1.14771000 |
| C | 0.45679400  | -5.37834000 | -0.25965800 |
| H | -2.54483000 | -5.91486200 | 1.39584700  |
| H | -0.89728400 | -6.13013200 | 2.00802300  |
| C | -1.43796400 | -7.51490600 | 0.42200100  |
| H | -1.51106300 | -4.29042300 | -1.83292700 |
| H | -2.90815100 | -4.82545400 | -0.89193600 |
| C | -1.79202800 | -6.44918500 | -1.81265400 |
| H | 1.08161600  | -5.35921100 | 0.64897600  |
| H | 0.83259800  | -4.59186400 | -0.93407100 |
| C | 0.52887200  | -6.75313800 | -0.92738000 |
| H | -1.80491200 | -8.27932500 | 1.12417500  |
| C | -2.30278200 | -7.51640800 | -0.84142700 |
| C | 0.01502900  | -7.81920000 | 0.04448200  |
| H | -2.41506000 | -6.44437600 | -2.71997100 |
| C | -0.33898600 | -6.75382800 | -2.18873100 |
| H | 1.57488800  | -6.96722000 | -1.19545600 |
| H | -3.35477000 | -7.31722000 | -0.57983000 |
| H | -2.27215900 | -8.50941400 | -1.31835600 |
| H | 0.64408600  | -7.84157600 | 0.94918600  |
| H | 0.08304400  | -8.81612600 | -0.42005200 |
| H | -0.27498600 | -7.73394600 | -2.68843600 |
| H | 0.03187600  | -6.00148000 | -2.90275300 |

#### IM4a

|                                  |              |
|----------------------------------|--------------|
| M06 SCF energy (au)              | -1872.004654 |
| M06 enthalpy (au)                | -1871.301891 |
| M06 free energy (au)             | -1871.407249 |
| M06 SCF energy in solution (au)  | -1872.499528 |
| M06 enthalpy in solution (au)    | -1871.796765 |
| M06 free energy in solution (au) | -1871.902123 |

#### Cartesian coordinates

| ATOM | X           | Y           | Z          |
|------|-------------|-------------|------------|
| Pd   | 0.66162500  | -2.34187400 | 2.64801800 |
| C    | 1.18123000  | -4.13250400 | 1.03385300 |
| O    | 0.86747900  | -4.37411700 | 2.25015000 |
| O    | 1.18860400  | -2.91435000 | 0.66544500 |
| C    | 0.97727700  | 0.63024200  | 2.02411800 |
| O    | 0.89325700  | 1.83721300  | 2.21731200 |
| N    | 0.50709800  | -0.32231300 | 2.90496600 |
| C    | -0.03263500 | 0.02992100  | 4.14164900 |
| C    | -0.25524300 | -1.06206600 | 5.02448600 |
| C    | -0.36815400 | 1.29407500  | 4.62022900 |
| C    | -0.77345500 | -0.90255300 | 6.33457200 |
| C    | -0.89106300 | 1.45411600  | 5.91838200 |
| H    | -0.21482400 | 2.15590900  | 3.98415400 |
| C    | -0.09830600 | -3.38616800 | 5.29393100 |
| C    | -0.93423500 | -2.07023300 | 7.11189800 |
| C    | -1.09506300 | 0.39818900  | 6.77503600 |

|   |             |             |             |
|---|-------------|-------------|-------------|
| H | -1.13900500 | 2.46308200  | 6.24478200  |
| C | -0.59856000 | -3.30267200 | 6.60331500  |
| H | -1.33036200 | -1.97688200 | 8.12305600  |
| H | -1.49783100 | 0.54250600  | 7.77624100  |
| H | -0.71611500 | -4.21099700 | 7.18797000  |
| N | 0.06014400  | -2.30292000 | 4.55351000  |
| H | 0.17466300  | -4.33268500 | 4.82896800  |
| C | 2.53031800  | 1.12568200  | 0.11213000  |
| H | 3.16609100  | 1.59128400  | 0.87610000  |
| C | 3.40892900  | 0.56523900  | -0.99336800 |
| H | 4.12090700  | 1.34162500  | -1.31084400 |
| C | 2.70002100  | -0.14529900 | -2.17086000 |
| H | 1.60531600  | -0.11876500 | -2.13356500 |
| H | 3.02866800  | 0.19585900  | -3.15747700 |
| C | 3.34133900  | -1.46799500 | -1.70889400 |
| H | 2.64144000  | -2.17918900 | -1.24356700 |
| H | 3.96770500  | -1.99743600 | -2.43943600 |
| N | 4.09479900  | -0.71371100 | -0.71327600 |
| H | 1.92252900  | 1.93863900  | -0.31128400 |
| C | 4.60355100  | -1.24182100 | 0.42934500  |
| O | 4.77665700  | -2.43710900 | 0.59825700  |
| O | 4.88754100  | -0.26475400 | 1.31025300  |
| C | 5.28227600  | -0.58470500 | 2.67401300  |
| C | 5.34497400  | 0.78413200  | 3.32964900  |
| H | 5.65712800  | 0.68936300  | 4.37776200  |
| H | 6.06279700  | 1.42983200  | 2.80805600  |
| H | 4.35853200  | 1.26787900  | 3.30203800  |
| C | 6.64748900  | -1.25114500 | 2.67492400  |
| H | 6.60772500  | -2.22761600 | 2.18221600  |
| H | 7.37727100  | -0.61881700 | 2.15225500  |
| H | 6.99217300  | -1.38802600 | 3.70895000  |
| C | 4.22359800  | -1.43880900 | 3.35603400  |
| H | 3.23844700  | -0.95105300 | 3.29588600  |
| H | 4.15195400  | -2.43489100 | 2.90578600  |
| H | 4.47796400  | -1.55056600 | 4.41919700  |
| C | 1.63878000  | 0.08982000  | 0.77669500  |
| H | 2.21782700  | -0.80648300 | 1.03091200  |
| H | 0.85067700  | -0.27046900 | 0.09536300  |
| C | 1.58061700  | -5.23720700 | 0.10172900  |
| C | 3.12509000  | -5.32466900 | 0.13929900  |
| C | 0.99463000  | -6.58463500 | 0.54702000  |
| C | 1.12887500  | -4.93409800 | -1.33551100 |
| H | 3.44808200  | -5.53301600 | 1.17294600  |
| H | 3.56882100  | -4.35656600 | -0.13862600 |
| C | 3.59493600  | -6.43555800 | -0.80137100 |
| H | -0.10634800 | -6.52875800 | 0.55065400  |
| H | 1.30597500  | -6.80027400 | 1.57956600  |
| C | 1.46949900  | -7.69271300 | -0.39661200 |
| H | 1.53315400  | -3.96361400 | -1.65672800 |
| H | 0.02993600  | -4.85001600 | -1.36863000 |
| C | 1.60718500  | -6.04457800 | -2.27275200 |
| H | 4.69354100  | -6.48725000 | -0.76833200 |
| C | 2.99816300  | -7.77397900 | -0.35832600 |
| C | 3.13607600  | -6.12037100 | -2.22796100 |
| H | 1.03884500  | -8.65164400 | -0.06990200 |
| C | 1.01355800  | -7.38263200 | -1.82492900 |
| H | 1.27697400  | -5.81642400 | -3.29775600 |
| H | 3.33856900  | -8.02062800 | 0.66026900  |
| H | 3.34862900  | -8.58255400 | -1.02010500 |
| H | 3.57158100  | -5.16364500 | -2.55984800 |

|   |             |             |             |
|---|-------------|-------------|-------------|
| H | 3.49555700  | -6.89763600 | -2.92151600 |
| H | 1.33554000  | -8.18622600 | -2.50669800 |
| H | -0.08693000 | -7.34248400 | -1.87143100 |

#### TS4a

|                                  |              |
|----------------------------------|--------------|
| M06 SCF energy (au)              | -1293.028796 |
| M06 enthalpy (au)                | -1292.603981 |
| M06 free energy (au)             | -1292.685299 |
| M06 SCF energy in solution (au)  | -1293.369802 |
| M06 enthalpy in solution (au)    | -1292.944987 |
| M06 free energy in solution (au) | -1293.026305 |

#### Cartesian coordinates

| ATOM | X           | Y           | Z           |
|------|-------------|-------------|-------------|
| Pd   | 0.00320400  | -1.73223600 | 1.99812700  |
| C    | 0.82357000  | 1.02293200  | 2.31201900  |
| O    | 1.02073300  | 2.16080500  | 2.70585600  |
| N    | -0.04880300 | 0.10806400  | 2.84849800  |
| C    | -0.74621200 | 0.23178500  | 4.02917200  |
| C    | -1.32096400 | -0.98906400 | 4.52093400  |
| C    | -0.92959400 | 1.38982000  | 4.77468300  |
| C    | -2.07487500 | -0.99459500 | 5.72546500  |
| C    | -1.67207900 | 1.36449000  | 5.96883300  |
| H    | -0.48195200 | 2.31047700  | 4.41430400  |
| C    | -1.63901300 | -3.27882000 | 4.24027500  |
| C    | -2.62277300 | -2.22617100 | 6.14640900  |
| C    | -2.24481400 | 0.20908600  | 6.44496300  |
| H    | -1.79673100 | 2.29463200  | 6.52173500  |
| C    | -2.41326000 | -3.36516300 | 5.41072700  |
| H    | -3.21103600 | -2.25261000 | 7.06412400  |
| H    | -2.82683100 | 0.19936400  | 7.36568300  |
| H    | -2.82419500 | -4.32460900 | 5.71474500  |
| N    | -1.11413000 | -2.14634700 | 3.80941000  |
| H    | -1.43710400 | -4.16266800 | 3.63672000  |
| C    | 0.89126400  | -0.73149000 | 0.46855100  |
| H    | 0.10210100  | -0.43311000 | -0.22916100 |
| C    | 1.40131300  | -2.05637000 | 0.23828400  |
| H    | 0.60851400  | -3.01093800 | 1.05493400  |
| C    | 2.81930100  | -2.60092600 | 0.43500200  |
| H    | 3.57741900  | -1.85101100 | 0.18035600  |
| H    | 3.04578500  | -3.04088100 | 1.40899400  |
| C    | 2.51496500  | -3.57142900 | -0.72495500 |
| H    | 3.22813500  | -3.60850400 | -1.55490200 |
| H    | 2.27566600  | -4.59515100 | -0.40107600 |
| N    | 1.31478300  | -2.77788100 | -1.00343400 |
| C    | 0.16990100  | -3.11042400 | -1.68329700 |
| O    | -0.88908300 | -2.54386300 | -1.50861700 |
| O    | 0.43209700  | -4.10941700 | -2.53358900 |
| C    | -0.60277600 | -4.59909900 | -3.44473100 |
| C    | 0.12520400  | -5.67613000 | -4.22842900 |
| H    | -0.55399400 | -6.13145600 | -4.96020400 |
| H    | 0.98243800  | -5.25179400 | -4.76607100 |
| H    | 0.49149300  | -6.46333300 | -3.55737500 |
| C    | -1.05559600 | -3.48025800 | -4.36692700 |
| H    | -1.58228200 | -2.69488600 | -3.81653600 |
| H    | -0.19240500 | -3.03819100 | -4.88176400 |
| H    | -1.73267200 | -3.88898500 | -5.12865400 |
| C    | -1.75256800 | -5.19795800 | -2.65315800 |
| H    | -1.37901800 | -5.96346400 | -1.96014200 |
| H    | -2.28814300 | -4.43316700 | -2.08310700 |

|   |             |             |             |
|---|-------------|-------------|-------------|
| H | -2.45728400 | -5.68006200 | -3.34381700 |
| C | 1.62649700  | 0.40553800  | 1.14914200  |
| H | 1.88585700  | 1.20376900  | 0.43979900  |
| H | 2.57371500  | 0.04893700  | 1.58533000  |

### IM6a

|                                  |              |
|----------------------------------|--------------|
| M06 SCF energy (au)              | -1293.053568 |
| M06 enthalpy (au)                | -1292.626758 |
| M06 free energy (au)             | -1292.707934 |
| M06 SCF energy in solution (au)  | -1293.393389 |
| M06 enthalpy in solution (au)    | -1292.966579 |
| M06 free energy in solution (au) | -1293.047755 |

### Cartesian coordinates

| ATOM | X           | Y           | Z           |
|------|-------------|-------------|-------------|
| Pd   | -0.09033200 | -1.95279300 | 1.97307700  |
| C    | 0.42687700  | 0.99478700  | 2.13440500  |
| O    | 0.47820000  | 2.16180800  | 2.49523400  |
| N    | -0.17765900 | -0.04753400 | 2.77549200  |
| C    | -0.78784900 | 0.02530900  | 4.01048700  |
| C    | -1.22929200 | -1.22947400 | 4.53842700  |
| C    | -1.00705800 | 1.16399600  | 4.77887700  |
| C    | -1.87582900 | -1.30688000 | 5.80081500  |
| C    | -1.64511200 | 1.07479800  | 6.02900400  |
| H    | -0.67023300 | 2.11941800  | 4.39077800  |
| C    | -1.41091200 | -3.54126200 | 4.23828900  |
| C    | -2.28817800 | -2.58129200 | 6.24595700  |
| C    | -2.07902700 | -0.12384500 | 6.54425400  |
| H    | -1.79805000 | 1.99105200  | 6.59762600  |
| C    | -2.06190000 | -3.69319000 | 5.47352300  |
| H    | -2.78844400 | -2.66377200 | 7.21112100  |
| H    | -2.57700100 | -0.18254500 | 7.51107900  |
| H    | -2.37111500 | -4.68417100 | 5.79555400  |
| N    | -1.00966400 | -2.36217100 | 3.79022700  |
| H    | -1.20703400 | -4.39521000 | 3.59645000  |
| C    | 0.48898300  | -0.71334900 | 0.25602300  |
| H    | -0.45386400 | -0.56867500 | -0.27533500 |
| C    | 1.17582300  | -1.87911800 | -0.00577400 |
| H    | -0.04744300 | -3.48690500 | 1.50864800  |
| C    | 2.58997600  | -2.37436600 | 0.22932900  |
| H    | 3.34233500  | -1.76301000 | -0.28513800 |
| H    | 2.88660800  | -2.52423200 | 1.27095200  |
| C    | 2.16727300  | -3.63408800 | -0.55786300 |
| H    | 2.78218900  | -3.93086200 | -1.41299300 |
| H    | 1.95434500  | -4.50615200 | 0.07632300  |
| N    | 0.93897900  | -2.92306000 | -0.92424700 |
| C    | -0.24164400 | -3.54979300 | -1.27896500 |
| O    | -0.28187100 | -4.71423600 | -1.60598800 |
| O    | -1.25026600 | -2.68267000 | -1.19739200 |
| C    | -2.63979700 | -3.13177500 | -1.29606500 |
| C    | -3.41578400 | -1.85816600 | -1.01360500 |
| H    | -4.49435800 | -2.05426100 | -1.06455400 |
| H    | -3.17713000 | -1.47630700 | -0.01157600 |
| H    | -3.16918300 | -1.08280700 | -1.75062300 |
| C    | -2.92456900 | -4.17778900 | -0.23165200 |
| H    | -2.37462400 | -5.10520800 | -0.42076800 |
| H    | -2.64346800 | -3.79431500 | 0.75979500  |
| H    | -3.99961800 | -4.40248000 | -0.22554800 |
| C    | -2.91602300 | -3.63951000 | -2.70006000 |
| H    | -2.65782700 | -2.87163600 | -3.44103000 |

|   |             |             |             |
|---|-------------|-------------|-------------|
| H | -2.34237600 | -4.54651400 | -2.91396400 |
| H | -3.98571400 | -3.86593200 | -2.80263900 |
| C | 1.12930700  | 0.50594000  | 0.86795400  |
| H | 1.15859700  | 1.33094300  | 0.14335200  |
| H | 2.17455100  | 0.29029000  | 1.14255300  |

### IM1b

|                                  |              |
|----------------------------------|--------------|
| M06 SCF energy (au)              | -1561.351667 |
| M06 enthalpy (au)                | -1560.821499 |
| M06 free energy (au)             | -1560.925109 |
| M06 SCF energy in solution (au)  | -1561.781987 |
| M06 enthalpy in solution (au)    | -1561.251819 |
| M06 free energy in solution (au) | -1561.355429 |

### Cartesian coordinates

| ATOM | X           | Y           | Z           |
|------|-------------|-------------|-------------|
| Pd   | -0.84081000 | -2.52665900 | 2.20021500  |
| C    | -1.82043800 | -4.76899100 | 0.66194200  |
| O    | -2.14809500 | -3.94865400 | -0.18859800 |
| O    | -1.21989200 | -4.49832200 | 1.78504800  |
| C    | -2.03444100 | -6.25314500 | 0.45358000  |
| H    | -2.72161900 | -6.42600200 | -0.37917700 |
| H    | -1.06767200 | -6.72048900 | 0.22001600  |
| H    | -2.41125100 | -6.73271900 | 1.36364500  |
| C    | -0.25136700 | 0.35614100  | 2.01106500  |
| O    | -0.06725900 | 1.52083700  | 2.32428900  |
| N    | -0.59057500 | -0.65874500 | 2.86796100  |
| C    | -0.94132200 | -0.47200900 | 4.20299300  |
| C    | -1.54308400 | -1.60267500 | 4.82685700  |
| C    | -0.78935800 | 0.67925900  | 4.96383300  |
| C    | -1.98009800 | -1.56728600 | 6.17423700  |
| C    | -1.22436000 | 0.70959000  | 6.30374800  |
| H    | -0.34064400 | 1.55379700  | 4.50672600  |
| C    | -2.23917600 | -3.82448400 | 4.58112300  |
| C    | -2.56507100 | -2.74360200 | 6.69370600  |
| C    | -1.80680500 | -0.37617500 | 6.91286300  |
| H    | -1.08659900 | 1.63124200  | 6.86688600  |
| C    | -2.69539600 | -3.86479800 | 5.91002000  |
| H    | -2.91017000 | -2.74527400 | 7.72778800  |
| H    | -2.13436000 | -0.33879800 | 7.95071600  |
| H    | -3.14157500 | -4.77782600 | 6.29517000  |
| N    | -1.69211300 | -2.73659900 | 4.07342500  |
| H    | -2.30068000 | -4.67800100 | 3.90654300  |
| C    | -0.17118000 | -1.57274100 | 0.29948900  |
| H    | -0.86657000 | -1.98798300 | -0.43395900 |
| C    | 0.85625300  | -2.38433800 | 0.73922900  |
| H    | 1.63638900  | -1.92511800 | 1.36061400  |
| C    | 1.21017100  | -3.71244000 | 0.14733400  |
| H    | 1.36119100  | -4.45275900 | 0.94713400  |
| H    | 0.37965400  | -4.06745900 | -0.48067700 |
| C    | 2.90160800  | -4.93989000 | -1.28359600 |
| H    | 2.09738800  | -5.34201300 | -1.91559000 |
| H    | 3.78532800  | -4.80330100 | -1.91865300 |
| N    | 3.22422500  | -5.94151900 | -0.28872600 |
| H    | 2.51811600  | -6.57563300 | 0.05729500  |
| C    | 4.43310100  | -5.93402900 | 0.34271900  |
| O    | 5.33553800  | -5.16638400 | 0.07013400  |
| O    | 4.45527900  | -6.89829200 | 1.28220600  |
| C    | 5.64279700  | -7.10298600 | 2.10069800  |
| C    | 5.23147700  | -8.24960900 | 3.00774100  |

|   |             |             |             |
|---|-------------|-------------|-------------|
| H | 6.05456000  | -8.50760100 | 3.68629700  |
| H | 4.35722700  | -7.97190200 | 3.61024100  |
| H | 4.97624000  | -9.13804200 | 2.41627800  |
| C | 5.93966200  | -5.85822700 | 2.92081800  |
| H | 6.23848100  | -5.02213500 | 2.28183900  |
| H | 5.05374600  | -5.56585600 | 3.50055500  |
| H | 6.75285500  | -6.07104700 | 3.62771400  |
| C | 6.81866800  | -7.51173100 | 1.22904600  |
| H | 6.55285800  | -8.38536100 | 0.61918000  |
| H | 7.12547400  | -6.69671200 | 0.56715500  |
| H | 7.66899900  | -7.78804700 | 1.86692200  |
| C | -0.19886600 | -0.08697200 | 0.55415800  |
| H | -1.08508900 | 0.35514600  | 0.07850900  |
| H | 0.66687500  | 0.40318100  | 0.08657400  |
| C | 2.48635700  | -3.60121900 | -0.68545800 |
| H | 3.31753100  | -3.22279600 | -0.07081100 |
| H | 2.33769200  | -2.87621600 | -1.50071600 |

### TS1b

|                                  |              |
|----------------------------------|--------------|
| M06 SCF energy (au)              | -1561.333243 |
| M06 enthalpy (au)                | -1560.807956 |
| M06 free energy (au)             | -1560.901400 |
| M06 SCF energy in solution (au)  | -1561.761133 |
| M06 enthalpy in solution (au)    | -1561.235846 |
| M06 free energy in solution (au) | -1561.329290 |

### Cartesian coordinates

| ATOM | X           | Y           | Z           |
|------|-------------|-------------|-------------|
| Pd   | -1.50485000 | -2.13299000 | 1.41811700  |
| C    | -4.71238700 | -2.63867000 | 2.31710800  |
| O    | -4.19970700 | -1.65326300 | 1.75693500  |
| O    | -4.42913400 | -3.86645500 | 2.06241200  |
| C    | -5.70299300 | -2.43027100 | 3.44200000  |
| H    | -5.15868800 | -2.50348800 | 4.39555400  |
| H    | -6.15908100 | -1.43740000 | 3.38504300  |
| H    | -6.47159800 | -3.21042200 | 3.44294200  |
| C    | 0.41140600  | 0.07747800  | 2.08297000  |
| O    | 1.11798200  | 0.83292300  | 2.72757100  |
| N    | -0.53164600 | -0.78144200 | 2.58793800  |
| C    | -0.82975000 | -0.86146400 | 3.94785800  |
| C    | -1.48656400 | -2.05115300 | 4.34729900  |
| C    | -0.53640300 | 0.08924100  | 4.91504600  |
| C    | -1.80569600 | -2.28510800 | 5.70840900  |
| C    | -0.88704600 | -0.13282900 | 6.25984800  |
| H    | -0.01327600 | 0.99348400  | 4.62718800  |
| C    | -2.28586300 | -4.14011100 | 3.72073900  |
| C    | -2.40673100 | -3.52077200 | 6.03256800  |
| C    | -1.50577500 | -1.29019200 | 6.66430100  |
| H    | -0.64890900 | 0.63814400  | 6.99066100  |
| C    | -2.63027700 | -4.44883500 | 5.05017800  |
| H    | -2.67284300 | -3.72353400 | 7.07010200  |
| H    | -1.76885100 | -1.46081100 | 7.70735000  |
| H    | -3.07665700 | -5.41586800 | 5.26521700  |
| N    | -1.76165000 | -2.97875000 | 3.37352300  |
| H    | -2.42989900 | -4.87358600 | 2.93853500  |
| C    | -0.88515000 | -0.41400100 | 0.06679400  |
| H    | -1.68125600 | 0.31765900  | 0.24223700  |
| C    | -1.16269200 | -1.45256800 | -0.78370900 |
| H    | -0.34474500 | -2.11751900 | -1.08885400 |
| C    | -2.40067700 | -1.46701100 | -1.61967700 |



|   |             |             |             |
|---|-------------|-------------|-------------|
| H | -3.18707400 | -0.88104300 | -1.11761600 |
| H | -2.14794300 | -0.92816600 | -2.54873600 |
| C | -3.47584600 | -3.55056000 | -0.75718100 |
| H | -4.29203300 | -2.95201000 | -0.33546100 |
| H | -3.88336700 | -4.53067300 | -1.04259300 |
| N | -2.54423600 | -3.77094900 | 0.37131400  |
| H | -3.30971100 | -3.91874000 | 1.22791800  |
| C | -1.58285200 | -4.76566400 | 0.10845500  |
| O | -1.34562000 | -5.21936400 | -0.98920000 |
| O | -0.95927000 | -5.11583900 | 1.23955500  |
| C | 0.33646100  | -5.79380300 | 1.20423100  |
| C | 0.74290300  | -5.81297600 | 2.66695000  |
| H | 1.71974500  | -6.30039100 | 2.77878500  |
| H | 0.81349200  | -4.79059800 | 3.06213600  |
| H | 0.01003300  | -6.36887900 | 3.26680300  |
| C | 1.31692000  | -4.96059100 | 0.39521300  |
| H | 1.05667600  | -4.94830900 | -0.66850800 |
| H | 1.33485200  | -3.92805000 | 0.77652000  |
| H | 2.32677400  | -5.37845400 | 0.49921000  |
| C | 0.18263300  | -7.20550500 | 0.66697400  |
| H | -0.57479200 | -7.75076300 | 1.24521000  |
| H | -0.11150800 | -7.20316900 | -0.38631200 |
| H | 1.13698700  | -7.73959800 | 0.76836600  |
| C | 0.46787500  | -0.04130800 | 0.57410700  |
| H | 0.79446200  | 0.91964900  | 0.15585000  |
| H | 1.21597100  | -0.79836000 | 0.29241800  |
| C | -2.90953800 | -2.85069500 | -1.96987300 |
| H | -2.11532000 | -3.45266300 | -2.42962100 |
| H | -3.71516900 | -2.76375500 | -2.71221200 |

### IM2b

|                                  |              |
|----------------------------------|--------------|
| M06 SCF energy (au)              | -1332.376095 |
| M06 enthalpy (au)                | -1331.915912 |
| M06 free energy (au)             | -1331.998348 |
| M06 SCF energy in solution (au)  | -1332.727513 |
| M06 enthalpy in solution (au)    | -1332.267330 |
| M06 free energy in solution (au) | -1332.349766 |

### Cartesian coordinates

| ATOM | X           | Y           | Z          |
|------|-------------|-------------|------------|
| Pd   | -0.42672600 | -2.26267700 | 2.36483000 |
| C    | -0.33229900 | 0.71490600  | 2.07133600 |
| O    | -0.55333300 | 1.90584100  | 2.22033400 |
| N    | -0.90046000 | -0.31931300 | 2.76712200 |
| C    | -1.77931300 | -0.13951000 | 3.83032700 |
| C    | -2.20202400 | -1.34135600 | 4.46783700 |
| C    | -2.26530800 | 1.06079400  | 4.33469600 |
| C    | -3.07296900 | -1.32480400 | 5.58711500 |
| C    | -3.13417300 | 1.07145000  | 5.44315400 |
| H    | -1.95947400 | 1.98779400  | 3.86389800 |
| C    | -2.08315700 | -3.67439400 | 4.50601100 |
| C    | -3.42208100 | -2.56947000 | 6.15498800 |
| C    | -3.53828600 | -0.08227800 | 6.07047600 |
| H    | -3.48967000 | 2.03425100  | 5.80715100 |
| C    | -2.93337500 | -3.73764200 | 5.62311500 |
| H    | -4.08631300 | -2.58475000 | 7.01935200 |
| H    | -4.20870800 | -0.06050000 | 6.92844000 |
| H    | -3.19091400 | -4.70666400 | 6.04300700 |
| N    | -1.73598200 | -2.52406200 | 3.96104200 |
| H    | -1.66910100 | -4.56487700 | 4.03313900 |

|   |             |             |             |
|---|-------------|-------------|-------------|
| C | 0.44527500  | -1.19913400 | 0.61084800  |
| H | -0.31760600 | -1.30564600 | -0.16690400 |
| C | 1.28220100  | -2.26660600 | 0.86282400  |
| H | 2.14112200  | -2.07951800 | 1.51704100  |
| C | 1.35316000  | -3.51097200 | 0.01643800  |
| H | 1.83121600  | -3.22126100 | -0.93336800 |
| H | 2.02852000  | -4.23714100 | 0.49147600  |
| C | -0.43189900 | -4.97792100 | 0.97497800  |
| H | -1.51241500 | -5.18238600 | 0.91614600  |
| H | 0.08928500  | -5.94554700 | 0.99167500  |
| N | -0.12450000 | -4.28436500 | 2.20867300  |
| C | 0.81946100  | -4.83482700 | 3.01241400  |
| O | 1.29561100  | -5.95852800 | 2.92681600  |
| O | 1.15802900  | -3.94236400 | 3.98929000  |
| C | 1.90925100  | -4.35146400 | 5.15669700  |
| C | 1.89986600  | -3.09485100 | 6.01241600  |
| H | 2.43600900  | -3.26655300 | 6.95502400  |
| H | 2.38252900  | -2.26359800 | 5.48178600  |
| H | 0.86688700  | -2.79782900 | 6.24306500  |
| C | 3.33101700  | -4.72733000 | 4.77200400  |
| H | 3.34324500  | -5.62557700 | 4.14793600  |
| H | 3.80062100  | -3.90312200 | 4.21754300  |
| H | 3.92677200  | -4.91124100 | 5.67671300  |
| C | 1.19496200  | -5.48344600 | 5.87969400  |
| H | 0.16203700  | -5.18790200 | 6.11594100  |
| H | 1.17584500  | -6.39293200 | 5.27167100  |
| H | 1.70805300  | -5.70066900 | 6.82630000  |
| C | 0.70520600  | 0.20097400  | 1.08471800  |
| H | 0.75053100  | 0.89493300  | 0.23576500  |
| H | 1.68267500  | 0.25083800  | 1.58980900  |
| C | 0.01250000  | -4.18232400 | -0.25349200 |
| H | 0.09264100  | -4.85669500 | -1.11697400 |
| H | -0.74393100 | -3.42943500 | -0.52441300 |

### TS2b

|                                  |              |
|----------------------------------|--------------|
| M06 SCF energy (au)              | -1332.347059 |
| M06 enthalpy (au)                | -1331.888738 |
| M06 free energy (au)             | -1331.970874 |
| M06 SCF energy in solution (au)  | -1332.697506 |
| M06 enthalpy in solution (au)    | -1332.239185 |
| M06 free energy in solution (au) | -1332.321321 |

### Cartesian coordinates

| ATOM | X           | Y           | Z          |
|------|-------------|-------------|------------|
| Pd   | -0.60798900 | -2.31825900 | 2.46295000 |
| C    | -0.14065200 | 0.49862200  | 2.45464200 |
| O    | -0.15151600 | 1.69352800  | 2.70047200 |
| N    | -1.02876800 | -0.43514700 | 2.93649700 |
| C    | -1.94791600 | -0.24919300 | 3.95075300 |
| C    | -2.44300100 | -1.45611700 | 4.54527500 |
| C    | -2.41220800 | 0.96145700  | 4.44792100 |
| C    | -3.39521900 | -1.41362100 | 5.59702700 |
| C    | -3.35384300 | 0.98934200  | 5.49351600 |
| H    | -2.02778800 | 1.88035600  | 4.01706200 |
| C    | -2.38046400 | -3.78749600 | 4.60371500 |
| C    | -3.83059400 | -2.64912600 | 6.12724500 |
| C    | -3.85042200 | -0.16016900 | 6.06255100 |
| H    | -3.69780200 | 1.95817300  | 5.85306600 |
| C    | -3.33216300 | -3.83174000 | 5.63884800 |
| H    | -4.56564400 | -2.64453900 | 6.93253500 |

|   |             |             |             |
|---|-------------|-------------|-------------|
| H | -4.58434100 | -0.12523200 | 6.86659100  |
| H | -3.65192500 | -4.79178800 | 6.03590000  |
| N | -1.95727400 | -2.65246300 | 4.08151900  |
| H | -1.94249000 | -4.69996900 | 4.19366200  |
| C | 0.50872200  | -1.46377700 | 0.95034800  |
| H | -0.16874100 | -1.31718100 | 0.09862800  |
| C | 1.29944800  | -2.65314700 | 0.88059700  |
| H | 2.19781700  | -2.67995300 | 1.50189800  |
| C | 1.27928600  | -3.49905900 | -0.36217000 |
| H | 1.46130200  | -2.85624300 | -1.23577700 |
| H | 2.08345700  | -4.24762400 | -0.31699400 |
| C | -0.20747500 | -4.97813200 | 0.84940100  |
| H | -1.25497900 | -5.24449600 | 1.05684800  |
| H | 0.37342300  | -5.91112500 | 0.81428300  |
| N | 0.33357200  | -4.12539000 | 1.89512800  |
| C | 1.02639600  | -4.73918900 | 2.91175700  |
| O | 1.07860700  | -5.94066700 | 3.10329000  |
| O | 1.64895100  | -3.80519800 | 3.66206500  |
| C | 2.18828700  | -4.12135000 | 4.97471100  |
| C | 2.61550900  | -2.75774800 | 5.49033300  |
| H | 3.03577400  | -2.84532600 | 6.50053900  |
| H | 3.37821800  | -2.31845200 | 4.83400000  |
| H | 1.75499700  | -2.07492100 | 5.52339100  |
| C | 3.38234700  | -5.05222000 | 4.84814300  |
| H | 3.08050800  | -6.03152300 | 4.46495100  |
| H | 4.12989100  | -4.62024600 | 4.16945000  |
| H | 3.85323800  | -5.18387100 | 5.83181600  |
| C | 1.09632800  | -4.70071100 | 5.85890700  |
| H | 0.23498000  | -4.01749000 | 5.88745900  |
| H | 0.76692200  | -5.68098100 | 5.49885100  |
| H | 1.47420300  | -4.81432500 | 6.88369100  |
| C | 0.95455100  | -0.16391500 | 1.60588500  |
| H | 1.31484800  | 0.56994800  | 0.87073200  |
| H | 1.79532000  | -0.36250800 | 2.29242500  |
| C | -0.06610700 | -4.21143200 | -0.45935500 |
| H | -0.10914500 | -4.88235100 | -1.32590800 |
| H | -0.87792800 | -3.47771400 | -0.57315000 |

### IM3b

|                                  |              |
|----------------------------------|--------------|
| M06 SCF energy (au)              | -1911.306481 |
| M06 enthalpy (au)                | -1910.573552 |
| M06 free energy (au)             | -1910.679331 |
| M06 SCF energy in solution (au)  | -1911.819825 |
| M06 enthalpy in solution (au)    | -1911.086896 |
| M06 free energy in solution (au) | -1911.192675 |

### Cartesian coordinates

| ATOM | X           | Y           | Z          |
|------|-------------|-------------|------------|
| Pd   | -1.58169000 | -1.71884400 | 2.84505200 |
| C    | -2.25822200 | -4.47332400 | 1.61985000 |
| O    | -1.80975800 | -3.85353300 | 2.58415300 |
| O    | -2.73938600 | -3.84818400 | 0.55989800 |
| C    | -1.05593700 | 1.10407800  | 2.36560200 |
| O    | -0.73633400 | 2.27173500  | 2.53498400 |
| N    | -1.26962200 | 0.17477300  | 3.35549500 |
| C    | -1.20835300 | 0.42822800  | 4.71706400 |
| C    | -1.48746300 | -0.68614700 | 5.57220000 |
| C    | -0.90996500 | 1.64509500  | 5.32212800 |
| C    | -1.44262900 | -0.55598300 | 6.98615800 |
| C    | -0.88282700 | 1.76327900  | 6.72373400 |

|   |             |             |             |
|---|-------------|-------------|-------------|
| H | -0.69657700 | 2.49878900  | 4.68885900  |
| C | -2.01498600 | -2.94935700 | 5.72945500  |
| C | -1.69781900 | -1.71569400 | 7.75183900  |
| C | -1.13734000 | 0.69871700  | 7.55546400  |
| H | -0.64442500 | 2.73576700  | 7.15254800  |
| C | -1.98162700 | -2.90879000 | 7.13511800  |
| H | -1.66281200 | -1.64355500 | 8.83928500  |
| H | -1.10306700 | 0.79969100  | 8.63947600  |
| H | -2.17944000 | -3.81224800 | 7.70667300  |
| N | -1.77749600 | -1.88776100 | 4.98518300  |
| H | -2.23233000 | -3.87352300 | 5.19143000  |
| C | -1.15989300 | -1.00830800 | 0.93302200  |
| H | -1.84564100 | -1.39153800 | 0.15319500  |
| C | 0.26317100  | -1.40504800 | 0.53231700  |
| H | 0.97336700  | -0.92771300 | 1.22209400  |
| C | 0.58948500  | -1.07089400 | -0.93249600 |
| H | 0.14100500  | -0.12833500 | -1.26727100 |
| H | 1.67929400  | -0.98327000 | -1.05404600 |
| C | 0.45578600  | -3.45435600 | -0.79665700 |
| H | -0.25801400 | -4.28620700 | -0.85483500 |
| H | 1.44919100  | -3.86197100 | -1.03814500 |
| N | 0.48027400  | -2.86477500 | 0.54436500  |
| H | -2.60792900 | -2.88532900 | 0.72233300  |
| C | 1.04478800  | -3.58830000 | 1.55154300  |
| O | 1.30132200  | -4.78003900 | 1.44979800  |
| O | 1.27361000  | -2.82823100 | 2.63455200  |
| C | 1.93867500  | -3.36900100 | 3.81235500  |
| C | 1.89153500  | -2.20603800 | 4.78926600  |
| H | 2.46785400  | -2.44932300 | 5.69146600  |
| H | 2.31520200  | -1.30098300 | 4.33518700  |
| H | 0.85626600  | -1.98862100 | 5.08418800  |
| C | 3.37542100  | -3.71817700 | 3.46155200  |
| H | 3.41412500  | -4.51602500 | 2.71274200  |
| H | 3.89974700  | -2.83515400 | 3.07278800  |
| H | 3.90315000  | -4.05903300 | 4.36252700  |
| C | 1.18422100  | -4.56083500 | 4.38058200  |
| H | 0.10859200  | -4.33999700 | 4.42521700  |
| H | 1.33333200  | -5.45951600 | 3.77468200  |
| H | 1.53998500  | -4.75802300 | 5.40155700  |
| C | -1.33835300 | 0.51019700  | 1.00103800  |
| H | -2.38608300 | 0.76619700  | 0.77857300  |
| H | -0.73367700 | 1.05668700  | 0.26041900  |
| C | 0.07776600  | -2.28639300 | -1.69850600 |
| H | 0.50950900  | -2.38002500 | -2.70127500 |
| H | -1.01425500 | -2.23319200 | -1.81886800 |
| C | -2.32009400 | -5.97266400 | 1.55730300  |
| C | -1.69973000 | -6.58444900 | 2.81840600  |
| C | -3.79310200 | -6.41848100 | 1.43707900  |
| C | -1.54027100 | -6.47458200 | 0.32184400  |
| H | -2.23050000 | -6.21517000 | 3.71131600  |
| H | -0.65484000 | -6.25030000 | 2.90099200  |
| C | -1.77613300 | -8.11015600 | 2.74707000  |
| H | -4.24492900 | -5.97462900 | 0.53740700  |
| H | -4.36310200 | -6.04957800 | 2.30616500  |
| C | -3.85886100 | -7.94648800 | 1.37062700  |
| H | -0.49134100 | -6.14507700 | 0.40079100  |
| H | -1.96912000 | -6.03146600 | -0.59058700 |
| C | -1.61908300 | -8.00142200 | 0.25550400  |
| H | -1.33137500 | -8.53316700 | 3.66031500  |
| C | -3.24004900 | -8.54457000 | 2.63679200  |

|   |             |             |             |
|---|-------------|-------------|-------------|
| C | -1.00017300 | -8.59890700 | 1.52127800  |
| H | -4.91298500 | -8.25247100 | 1.29037300  |
| C | -3.08295600 | -8.43574300 | 0.14452800  |
| H | -1.06136900 | -8.34500900 | -0.62858700 |
| H | -3.80193900 | -8.21433400 | 3.52562400  |
| H | -3.30763200 | -9.64360900 | 2.60382800  |
| H | 0.05691600  | -8.29970100 | 1.60031600  |
| H | -1.02582700 | -9.69920000 | 1.47117000  |
| H | -3.14699100 | -9.53324700 | 0.07413300  |
| H | -3.53146800 | -8.02730900 | -0.77540300 |

### TS3b

|                                  |              |
|----------------------------------|--------------|
| M06 SCF energy (au)              | -1911.279436 |
| M06 enthalpy (au)                | -1910.552502 |
| M06 free energy (au)             | -1910.656183 |
| M06 SCF energy in solution (au)  | -1911.790164 |
| M06 enthalpy in solution (au)    | -1911.063230 |
| M06 free energy in solution (au) | -1911.166911 |

### Cartesian coordinates

| ATOM | X           | Y           | Z           |
|------|-------------|-------------|-------------|
| Pd   | -1.28826300 | -1.96418800 | 2.58045200  |
| C    | -1.26019400 | -4.52440800 | 1.30188600  |
| O    | -1.27454200 | -4.03755600 | 2.47555400  |
| O    | -1.31430800 | -3.79804700 | 0.27281100  |
| C    | -1.10998900 | 0.88000500  | 1.93924900  |
| O    | -1.02382100 | 2.09361700  | 2.05764300  |
| N    | -1.28779700 | -0.01058600 | 2.96401500  |
| C    | -1.49368000 | 0.32505200  | 4.29294500  |
| C    | -1.77112100 | -0.78039200 | 5.14748500  |
| C    | -1.46957400 | 1.59175500  | 4.86363600  |
| C    | -2.00245000 | -0.61439600 | 6.53562000  |
| C    | -1.71026000 | 1.75248400  | 6.24192700  |
| H    | -1.26564800 | 2.44667900  | 4.22846800  |
| C    | -2.02183900 | -3.10103200 | 5.30200600  |
| C    | -2.24194700 | -1.78342900 | 7.29194300  |
| C    | -1.96969000 | 0.68960900  | 7.07586700  |
| H    | -1.68311200 | 2.76072300  | 6.65260400  |
| C    | -2.25287200 | -3.01692300 | 6.68634700  |
| H    | -2.41697100 | -1.68913400 | 8.36381700  |
| H    | -2.14550700 | 0.83163700  | 8.14109600  |
| H    | -2.43588100 | -3.92597100 | 7.25321300  |
| N    | -1.78879100 | -2.02402300 | 4.57484000  |
| H    | -2.01090100 | -4.05093900 | 4.76686600  |
| C    | -0.53363900 | -1.24138800 | 0.56750300  |
| H    | -0.76860400 | -1.59658400 | -0.45334500 |
| C    | 0.99908200  | -1.29534900 | 0.69534100  |
| H    | 1.31915800  | -0.73508800 | 1.58312000  |
| C    | 1.69945500  | -0.80795500 | -0.57953600 |
| H    | 1.22175800  | 0.07110800  | -1.02894800 |
| H    | 2.73623900  | -0.53504900 | -0.33680200 |
| C    | 1.87968000  | -3.21120900 | -0.52829900 |
| H    | 1.26268400  | -4.08099800 | -0.78900200 |
| H    | 2.92494100  | -3.54780200 | -0.48803200 |
| N    | 1.50099400  | -2.67062600 | 0.77886100  |
| H    | -1.12969800 | -2.49648900 | 0.71946900  |
| C    | 1.87905000  | -3.34801100 | 1.89636800  |
| O    | 2.32860000  | -4.48277400 | 1.86221200  |
| O    | 1.70195900  | -2.60817900 | 3.00859600  |
| C    | 2.17124100  | -3.09213800 | 4.30072500  |

|   |             |             |             |
|---|-------------|-------------|-------------|
| C | 1.75349800  | -1.98112400 | 5.24982900  |
| H | 2.14641300  | -2.17846300 | 6.25576800  |
| H | 2.14024200  | -1.01275400 | 4.90652700  |
| H | 0.65987800  | -1.91116600 | 5.31212000  |
| C | 3.68557900  | -3.22241100 | 4.27578400  |
| H | 4.00384400  | -3.98320300 | 3.55616800  |
| H | 4.14835800  | -2.26194700 | 4.01214200  |
| H | 4.04561100  | -3.51201100 | 5.27227200  |
| C | 1.49214400  | -4.39855900 | 4.68247000  |
| H | 0.41482700  | -4.34088500 | 4.47488200  |
| H | 1.90369400  | -5.24477100 | 4.12485500  |
| H | 1.63337900  | -4.57901100 | 5.75751800  |
| C | -1.10342000 | 0.18065300  | 0.59707500  |
| H | -2.15160500 | 0.15188300  | 0.26085200  |
| H | -0.57786500 | 0.83129000  | -0.11723800 |
| C | 1.67508100  | -2.03767600 | -1.48680800 |
| H | 2.44217700  | -2.00363100 | -2.26842100 |
| H | 0.70470000  | -2.12406000 | -1.99548200 |
| C | -1.20038600 | -6.02983400 | 1.15294100  |
| C | -0.73439200 | -6.70948000 | 2.44672200  |
| C | -2.61660300 | -6.52668100 | 0.79778800  |
| C | -0.23623200 | -6.41213600 | 0.01693200  |
| H | -1.40273000 | -6.43181900 | 3.27734200  |
| H | 0.27159600  | -6.33902600 | 2.70274900  |
| C | -0.72166900 | -8.22861100 | 2.26294600  |
| H | -2.95741600 | -6.02967900 | -0.12395300 |
| H | -3.31686100 | -6.24350200 | 1.60179800  |
| C | -2.59969300 | -8.04641200 | 0.61741000  |
| H | 0.77402900  | -6.04740500 | 0.26800400  |
| H | -0.54952300 | -5.91250900 | -0.91212500 |
| C | -0.22539100 | -7.93120400 | -0.16747600 |
| H | -0.38921300 | -8.70210000 | 3.19951500  |
| C | -2.13325000 | -8.71090600 | 1.91574300  |
| C | 0.23800700  | -8.59877900 | 1.12946000  |
| H | -3.61546800 | -8.38976700 | 0.36766800  |
| C | -1.63672500 | -8.41287900 | -0.51545300 |
| H | 0.46557500  | -8.18858800 | -0.98474400 |
| H | -2.82883500 | -8.46817700 | 2.73575600  |
| H | -2.14139100 | -9.80686500 | 1.80072400  |
| H | 1.25949000  | -8.26986100 | 1.37791200  |
| H | 0.26977600  | -9.69311900 | 1.00242300  |
| H | -1.63669100 | -9.50403700 | -0.66978000 |
| H | -1.97161900 | -7.95349900 | -1.45947200 |

#### IM4b

|                                  |              |
|----------------------------------|--------------|
| M06 SCF energy (au)              | -1911.318373 |
| M06 enthalpy (au)                | -1910.584835 |
| M06 free energy (au)             | -1910.689604 |
| M06 SCF energy in solution (au)  | -1911.821873 |
| M06 enthalpy in solution (au)    | -1911.088335 |
| M06 free energy in solution (au) | -1911.193104 |

#### Cartesian coordinates

| ATOM | X           | Y           | Z          |
|------|-------------|-------------|------------|
| Pd   | -1.34783900 | -1.71851600 | 2.99227000 |
| C    | -0.75345800 | -3.46159200 | 1.35354400 |
| O    | -0.94651000 | -3.73670500 | 2.58799300 |
| O    | -0.96063500 | -2.26120300 | 0.98804600 |
| C    | -1.52283600 | 1.21592800  | 2.18170300 |
| O    | -1.25696900 | 2.39980200  | 2.35312800 |

|   |             |             |             |
|---|-------------|-------------|-------------|
| N | -1.59536000 | 0.29510700  | 3.21306800  |
| C | -1.61862900 | 0.69455600  | 4.54535900  |
| C | -1.63639800 | -0.37091300 | 5.48796100  |
| C | -1.66114100 | 1.98540100  | 5.06935900  |
| C | -1.72365200 | -0.16367000 | 6.88809100  |
| C | -1.75034300 | 2.19313200  | 6.45901300  |
| H | -1.61921000 | 2.83026200  | 4.39376100  |
| C | -1.56111600 | -2.69794600 | 5.76434900  |
| C | -1.73498600 | -1.31203200 | 7.71000500  |
| C | -1.78584100 | 1.16097400  | 7.36776800  |
| H | -1.78811000 | 3.22114600  | 6.81680600  |
| C | -1.65581600 | -2.56947900 | 7.15956200  |
| H | -1.80389700 | -1.18326800 | 8.79020100  |
| H | -1.85069000 | 1.34304700  | 8.43923400  |
| H | -1.66014600 | -3.46278800 | 7.77823600  |
| N | -1.55709300 | -1.63443500 | 4.97984100  |
| H | -1.48228500 | -3.66411800 | 5.26720500  |
| C | -1.49115000 | 1.61140600  | -0.32072900 |
| H | -1.79638300 | 2.64532100  | -0.10691000 |
| C | 0.01157200  | 1.61251100  | -0.59948800 |
| H | 0.53409400  | 2.07619800  | 0.24538400  |
| C | 0.33793100  | 2.28423300  | -1.93341500 |
| H | -0.29797400 | 3.15739700  | -2.12770400 |
| H | 1.38467800  | 2.62039200  | -1.93534900 |
| C | 0.66844200  | -0.08097900 | -2.22657000 |
| H | 0.09646200  | -0.98813200 | -2.46514300 |
| H | 1.72120900  | -0.29197400 | -2.46247100 |
| N | 0.55383300  | 0.25845600  | -0.80716800 |
| H | -2.02471100 | 1.29525400  | -1.23110600 |
| C | 1.31563100  | -0.43576200 | 0.08127700  |
| O | 1.97815300  | -1.41581700 | -0.22515700 |
| O | 1.24543600  | 0.10500100  | 1.31586300  |
| C | 2.30305000  | -0.13261500 | 2.28905200  |
| C | 1.91592000  | 0.77606700  | 3.44310600  |
| H | 2.68544400  | 0.73748000  | 4.22530100  |
| H | 1.80872600  | 1.81414300  | 3.10273800  |
| H | 0.95772400  | 0.46208700  | 3.87662500  |
| C | 3.63737400  | 0.29957800  | 1.70090400  |
| H | 3.92134200  | -0.32993700 | 0.85101800  |
| H | 3.58551400  | 1.34633800  | 1.37105200  |
| H | 4.42071500  | 0.22245100  | 2.46661100  |
| C | 2.33138100  | -1.58239300 | 2.74408300  |
| H | 1.32710300  | -1.90463400 | 3.06102300  |
| H | 2.68059400  | -2.24709900 | 1.94896500  |
| H | 3.00503600  | -1.67732500 | 3.60753400  |
| C | -1.90770800 | 0.69800600  | 0.81585200  |
| H | -1.51988100 | -0.30789600 | 0.63892200  |
| H | -3.00524200 | 0.59265900  | 0.83186100  |
| C | 0.14627000  | 1.15979000  | -2.95123000 |
| H | 0.67685700  | 1.33884600  | -3.89330900 |
| H | -0.91777100 | 1.04391000  | -3.19828700 |
| C | -0.23495700 | -4.48998500 | 0.39551100  |
| C | -0.92377600 | -5.84616700 | 0.61155100  |
| C | -0.42318100 | -4.03171200 | -1.05660800 |
| C | 1.27946700  | -4.64241100 | 0.67300700  |
| H | -2.00777300 | -5.74464600 | 0.43635900  |
| H | -0.79426100 | -6.16526500 | 1.65648000  |
| C | -0.32722900 | -6.88123500 | -0.34611500 |
| H | 0.07091500  | -3.05821400 | -1.19150600 |
| H | -1.49611300 | -3.88745000 | -1.26444800 |

|   |             |             |             |
|---|-------------|-------------|-------------|
| C | 0.17050800  | -5.07419100 | -2.00598800 |
| H | 1.42975100  | -4.94033100 | 1.72354300  |
| H | 1.76534000  | -3.66631600 | 0.52013800  |
| C | 1.87047100  | -5.68549100 | -0.27681500 |
| H | -0.83167900 | -7.84738100 | -0.19085000 |
| C | -0.52842100 | -6.41973900 | -1.79254000 |
| C | 1.17086100  | -7.03051200 | -0.06522700 |
| H | 0.02253100  | -4.74067900 | -3.04461900 |
| C | 1.66813700  | -5.22068100 | -1.72156700 |
| H | 2.94633100  | -5.78846000 | -0.06781100 |
| H | -1.60434400 | -6.32639000 | -2.01335400 |
| H | -0.12140400 | -7.17258000 | -2.48690500 |
| H | 1.32876800  | -7.38124000 | 0.96765700  |
| H | 1.60449600  | -7.79146300 | -0.73419300 |
| H | 2.11658200  | -5.94721900 | -2.41863400 |
| H | 2.17588900  | -4.25577600 | -1.87841600 |

#### TS4b

|                                  |              |
|----------------------------------|--------------|
| M06 SCF energy (au)              | -1332.335192 |
| M06 enthalpy (au)                | -1331.879746 |
| M06 free energy (au)             | -1331.962282 |
| M06 SCF energy in solution (au)  | -1332.686935 |
| M06 enthalpy in solution (au)    | -1332.231489 |
| M06 free energy in solution (au) | -1332.314025 |

#### Cartesian coordinates

| ATOM | X           | Y           | Z           |
|------|-------------|-------------|-------------|
| Pd   | -2.68753000 | -1.36427100 | 0.47447700  |
| C    | -1.73214600 | 0.55903000  | -1.47857100 |
| O    | -1.57768400 | 1.27100900  | -2.45781300 |
| N    | -2.86644800 | -0.13866800 | -1.14221100 |
| C    | -3.98428000 | -0.30684800 | -1.92666200 |
| C    | -4.87919500 | -1.34332400 | -1.49227500 |
| C    | -4.31501200 | 0.40402600  | -3.07483500 |
| C    | -6.07606000 | -1.60771000 | -2.21133700 |
| C    | -5.50031900 | 0.12433100  | -3.77748000 |
| H    | -3.63154600 | 1.17451600  | -3.41673500 |
| C    | -5.35293500 | -3.03679400 | 0.03477300  |
| C    | -6.91558200 | -2.63450600 | -1.72711400 |
| C    | -6.37701700 | -0.85138200 | -3.36563300 |
| H    | -5.72394400 | 0.70727900  | -4.67010200 |
| C    | -6.56371500 | -3.34761300 | -0.60929500 |
| H    | -7.84253400 | -2.84926700 | -2.25975900 |
| H    | -7.29754700 | -1.05784100 | -3.91032000 |
| H    | -7.19200000 | -4.14453500 | -0.21914600 |
| N    | -4.54445300 | -2.07925900 | -0.38119100 |
| H    | -5.02959700 | -3.59004300 | 0.91536800  |
| C    | -1.10922100 | -0.15110100 | 0.87238900  |
| H    | -1.53331200 | 0.66666900  | 1.46836200  |
| C    | -0.77753200 | -1.31488600 | 1.66646700  |
| H    | -1.98338300 | -2.21721700 | 1.74590800  |
| C    | -0.60743500 | -1.13855100 | 3.17578500  |
| H    | -1.08020500 | -1.96697300 | 3.72099700  |
| H    | -1.05504800 | -0.20246000 | 3.52647900  |
| C    | 1.26677500  | -2.35900600 | 2.39056500  |
| H    | 1.14621700  | -3.34102700 | 2.87433200  |
| H    | 2.28863100  | -2.30212600 | 2.00142900  |
| N    | 0.29983100  | -2.20245800 | 1.29646700  |
| C    | 0.30743000  | -2.98457500 | 0.16866700  |
| O    | -0.51314400 | -2.91233200 | -0.72527800 |



|   |             |             |             |
|---|-------------|-------------|-------------|
| O | 1.35137900  | -3.82646300 | 0.21444900  |
| C | 1.61324200  | -4.74534000 | -0.89291200 |
| C | 2.86688600  | -5.46812600 | -0.43221200 |
| H | 3.17357700  | -6.20429500 | -1.18591100 |
| H | 2.68605500  | -5.99386800 | 0.51388100  |
| H | 3.69132100  | -4.75923800 | -0.28372800 |
| C | 0.46136200  | -5.72387600 | -1.04533000 |
| H | -0.44974100 | -5.22214700 | -1.38360600 |
| H | 0.25957900  | -6.22482800 | -0.08913800 |
| H | 0.73369500  | -6.49288300 | -1.78055600 |
| C | 1.88714900  | -3.96830700 | -2.16914600 |
| H | 2.68398700  | -3.23125200 | -2.00277300 |
| H | 0.99261600  | -3.45079500 | -2.52717100 |
| H | 2.22581900  | -4.66215700 | -2.95000500 |
| C | -0.58997800 | 0.28647300  | -0.47856800 |
| H | 0.02552900  | 1.19323900  | -0.39863700 |
| H | 0.03564800  | -0.49431900 | -0.93083200 |
| C | 0.90621200  | -1.21833600 | 3.33071700  |
| H | 1.37328900  | -0.28418000 | 2.98719400  |
| H | 1.22880900  | -1.40360000 | 4.36094400  |

### IM1c

|                                  |              |
|----------------------------------|--------------|
| M06 SCF energy (au)              | -1600.631807 |
| M06 enthalpy (au)                | -1600.071959 |
| M06 free energy (au)             | -1600.178806 |
| M06 SCF energy in solution (au)  | -1601.073935 |
| M06 enthalpy in solution (au)    | -1600.514087 |
| M06 free energy in solution (au) | -1600.620934 |

### Cartesian coordinates

| ATOM | X           | Y           | Z           |
|------|-------------|-------------|-------------|
| Pd   | -1.24819000 | -2.65633800 | 2.43271300  |
| C    | -2.11023500 | -5.26045200 | 1.52808500  |
| O    | -2.63200900 | -4.67831700 | 0.58303300  |
| O    | -1.41944900 | -4.69679600 | 2.47729700  |
| C    | -2.16746600 | -6.76718400 | 1.65904900  |
| H    | -2.92795000 | -7.17850600 | 0.98959600  |
| H    | -1.18841200 | -7.18283500 | 1.38463600  |
| H    | -2.36719800 | -7.06955300 | 2.69294400  |
| C    | -1.05439900 | 0.16585100  | 1.59386300  |
| O    | -0.99098200 | 1.38346100  | 1.64072800  |
| N    | -1.16725400 | -0.67194800 | 2.67298900  |
| C    | -1.39406400 | -0.23996900 | 3.97770000  |
| C    | -1.77363500 | -1.26604200 | 4.89041000  |
| C    | -1.31190200 | 1.05756700  | 4.46483800  |
| C    | -2.06337400 | -0.98677300 | 6.24901400  |
| C    | -1.60043800 | 1.33063000  | 5.81676400  |
| H    | -1.03204300 | 1.85499100  | 3.78603100  |
| C    | -2.19797100 | -3.54866600 | 5.19209300  |
| C    | -2.43088200 | -2.07767600 | 7.06791800  |
| C    | -1.96784600 | 0.34694100  | 6.70359600  |
| H    | -1.52377800 | 2.36127900  | 6.15948800  |
| C    | -2.49826400 | -3.34884800 | 6.55076700  |
| H    | -2.65896100 | -1.89200300 | 8.11766600  |
| H    | -2.18361700 | 0.57252200  | 7.74688100  |
| H    | -2.77735600 | -4.19878400 | 7.16781200  |
| N    | -1.85538400 | -2.54481900 | 4.40761400  |
| H    | -2.22073200 | -4.52907400 | 4.71668400  |
| C    | -0.92089600 | -2.06716400 | 0.30916700  |
| H    | -1.63823000 | -2.69341400 | -0.22682100 |

|   |             |             |             |
|---|-------------|-------------|-------------|
| C | 0.23969400  | -2.66622900 | 0.75893700  |
| H | 1.02363900  | -2.01288700 | 1.16412700  |
| C | 0.68770300  | -4.04139100 | 0.37236700  |
| H | 1.07138900  | -4.58602800 | 1.24845800  |
| H | -0.16745100 | -4.61046500 | -0.01967400 |
| C | 3.36309000  | -5.24264000 | -2.20003200 |
| H | 4.22616800  | -4.69254200 | -1.80529400 |
| H | 3.70780300  | -6.25354100 | -2.45771200 |
| N | 2.96519400  | -4.56078800 | -3.41375500 |
| H | 2.26816200  | -4.97917800 | -4.01555700 |
| C | 3.20762100  | -3.22924500 | -3.59431200 |
| O | 3.91391600  | -2.55373000 | -2.87136500 |
| O | 2.55088600  | -2.80447700 | -4.69088000 |
| C | 2.57341900  | -1.39567100 | -5.06081400 |
| C | 1.70226000  | -1.36073200 | -6.30436100 |
| H | 1.63426000  | -0.33496700 | -6.68854100 |
| H | 2.12508500  | -1.99954200 | -7.09009400 |
| H | 0.68877900  | -1.71556400 | -6.07780700 |
| C | 3.98932700  | -0.95484200 | -5.39308400 |
| H | 4.63092500  | -0.97413600 | -4.50757800 |
| H | 4.42014400  | -1.61339000 | -6.15891000 |
| H | 3.96927400  | 0.06704800  | -5.79532600 |
| C | 1.95167700  | -0.55787600 | -3.95452900 |
| H | 0.94687500  | -0.93354700 | -3.71550600 |
| H | 2.56494800  | -0.57619100 | -3.04833500 |
| H | 1.85292300  | 0.48258600  | -4.29165400 |
| C | -1.09688300 | -0.57072100 | 0.26073500  |
| H | -2.07167800 | -0.32432600 | -0.18209700 |
| H | -0.34448900 | -0.11419400 | -0.39846400 |
| C | 1.77854800  | -3.94139200 | -0.69433700 |
| H | 2.63326500  | -3.35708600 | -0.31705600 |
| H | 1.38573000  | -3.37694000 | -1.55578100 |
| C | 2.25695300  | -5.31034300 | -1.15387800 |
| H | 2.62667100  | -5.88446500 | -0.28880600 |
| H | 1.40168000  | -5.88040500 | -1.55545100 |

### TS5c

|                                  |              |
|----------------------------------|--------------|
| M06 SCF energy (au)              | -1600.615656 |
| M06 enthalpy (au)                | -1600.057035 |
| M06 free energy (au)             | -1600.151291 |
| M06 SCF energy in solution (au)  | -1601.050787 |
| M06 enthalpy in solution (au)    | -1600.492166 |
| M06 free energy in solution (au) | -1600.586422 |

### Cartesian coordinates

| ATOM | X           | Y           | Z          |
|------|-------------|-------------|------------|
| Pd   | -1.14741000 | -1.85164000 | 2.61916300 |
| C    | -1.01520400 | -4.76184900 | 2.07215500 |
| O    | -1.77078400 | -3.73044600 | 1.95581200 |
| O    | 0.17642800  | -4.75651000 | 2.42016300 |
| C    | -1.67819700 | -6.06361700 | 1.67692000 |
| H    | -2.71755400 | -6.10055800 | 2.02027600 |
| H    | -1.69935900 | -6.12694200 | 0.57904700 |
| H    | -1.11386700 | -6.91821700 | 2.06139000 |
| C    | -0.39892200 | 0.96960700  | 2.46104300 |
| O    | -0.20638800 | 2.13971400  | 2.76820600 |
| N    | -0.79855700 | -0.02309300 | 3.31646200 |
| C    | -1.00863700 | 0.13978200  | 4.67872700 |
| C    | -1.42854600 | -1.03832800 | 5.37138200 |
| C    | -0.81507600 | 1.29518700  | 5.42838000 |

|   |             |             |             |
|---|-------------|-------------|-------------|
| C | -1.63015400 | -1.03851200 | 6.77487500  |
| C | -1.01738900 | 1.28440200  | 6.82169100  |
| H | -0.50000600 | 2.19901700  | 4.91915200  |
| C | -1.98680300 | -3.29817100 | 5.21834500  |
| C | -2.03570900 | -2.25394900 | 7.37102100  |
| C | -1.41318100 | 0.15501300  | 7.49794800  |
| H | -0.84991100 | 2.20915800  | 7.37210700  |
| C | -2.21643800 | -3.37758700 | 6.60386400  |
| H | -2.20022000 | -2.28112100 | 8.44842500  |
| H | -1.56562500 | 0.16067600  | 8.57638800  |
| H | -2.52836900 | -4.32196200 | 7.04241100  |
| N | -1.60772100 | -2.17892000 | 4.63502600  |
| H | -2.11786700 | -4.15968400 | 4.56492900  |
| C | -0.61870100 | -0.95140800 | 0.76088500  |
| H | -1.67121700 | -1.02812500 | 0.43935900  |
| C | 0.20278100  | -1.75673800 | -0.07584300 |
| H | 1.08819100  | -1.28858300 | -0.52442800 |
| C | -0.41862800 | -2.86423400 | -0.86709600 |
| H | -1.10713000 | -3.42526000 | -0.21636400 |
| H | -1.06225000 | -2.35416200 | -1.60484100 |
| C | 2.38499200  | -3.66322500 | 0.09939400  |
| H | 3.12676700  | -4.24835500 | 0.66383300  |
| H | 2.93993500  | -2.99103000 | -0.56904800 |
| N | 1.62546900  | -2.81941500 | 1.04140400  |
| H | 1.07593200  | -3.39239600 | 1.71563400  |
| C | 2.43615100  | -1.85191000 | 1.68339100  |
| O | 3.25964200  | -1.20296900 | 1.07647900  |
| O | 2.13813800  | -1.78497700 | 2.97103700  |
| C | 2.95637200  | -0.98176200 | 3.89951100  |
| C | 2.30469700  | -1.25713000 | 5.24152100  |
| H | 2.87645500  | -0.76345700 | 6.03783800  |
| H | 1.27870200  | -0.86913500 | 5.26374600  |
| H | 2.27618200  | -2.33551800 | 5.44346500  |
| C | 2.89295700  | 0.49440000  | 3.55470700  |
| H | 3.34557200  | 0.70213800  | 2.58012800  |
| H | 1.86135800  | 0.86909500  | 3.56108700  |
| H | 3.44959700  | 1.05488300  | 4.31817300  |
| C | 4.37936600  | -1.51489200 | 3.87755600  |
| H | 4.38779200  | -2.59301600 | 4.08626500  |
| H | 4.86598800  | -1.33078600 | 2.91444400  |
| H | 4.96316800  | -1.01328100 | 4.66021600  |
| C | -0.14074100 | 0.46325600  | 1.05457500  |
| H | -0.56898500 | 1.19850700  | 0.35650500  |
| H | 0.95156700  | 0.53190400  | 0.91185600  |
| C | 0.53732800  | -3.79125000 | -1.60495000 |
| H | 1.14653000  | -3.20336000 | -2.31226100 |
| H | -0.05472800 | -4.48789500 | -2.21446600 |
| C | 1.46075000  | -4.57146500 | -0.68284900 |
| H | 0.88165100  | -5.18667800 | 0.02362500  |
| H | 2.07819900  | -5.26335000 | -1.27208300 |

### IM5c

|                                  |              |
|----------------------------------|--------------|
| M06 SCF energy (au)              | -1600.635164 |
| M06 enthalpy (au)                | -1600.074295 |
| M06 free energy (au)             | -1600.168950 |
| M06 SCF energy in solution (au)  | -1601.070507 |
| M06 enthalpy in solution (au)    | -1600.509638 |
| M06 free energy in solution (au) | -1600.604293 |

Cartesian coordinates

| ATOM | X           | Y           | Z           |
|------|-------------|-------------|-------------|
| Pd   | -1.13915800 | -1.83785800 | 2.64204500  |
| C    | -0.82151400 | -4.74931500 | 2.13966700  |
| O    | -1.66824200 | -3.80164800 | 2.06563100  |
| O    | 0.42123600  | -4.61795800 | 2.21374400  |
| C    | -1.39298400 | -6.14657000 | 2.05605500  |
| H    | -2.41866100 | -6.18470300 | 2.43654400  |
| H    | -1.41771100 | -6.45089600 | 0.99987800  |
| H    | -0.75457700 | -6.85618800 | 2.59141100  |
| C    | -0.30528900 | 0.95569900  | 2.50651500  |
| O    | -0.06563400 | 2.12040900  | 2.80802300  |
| N    | -0.78049100 | -0.01153300 | 3.35142600  |
| C    | -1.03048100 | 0.16880400  | 4.70386200  |
| C    | -1.52599500 | -0.98270500 | 5.40045800  |
| C    | -0.81970500 | 1.32777700  | 5.44537800  |
| C    | -1.79381500 | -0.93916000 | 6.79380700  |
| C    | -1.08606400 | 1.35571100  | 6.82711400  |
| H    | -0.45061100 | 2.20944700  | 4.93338200  |
| C    | -2.17830000 | -3.21485900 | 5.27368200  |
| C    | -2.28208000 | -2.12062700 | 7.39735400  |
| C    | -1.56287400 | 0.25894300  | 7.50455500  |
| H    | -0.90650700 | 2.28486500  | 7.36664300  |
| C    | -2.47820800 | -3.25350300 | 6.64825800  |
| H    | -2.49907400 | -2.11229300 | 8.46594700  |
| H    | -1.76877600 | 0.29366800  | 8.57373000  |
| H    | -2.85528700 | -4.17125400 | 7.09286300  |
| N    | -1.72106400 | -2.13064300 | 4.68223300  |
| H    | -2.31652000 | -4.08577000 | 4.63158600  |
| C    | -0.52918400 | -1.00565800 | 0.84547900  |
| H    | -1.48860200 | -0.93904600 | 0.30927400  |
| C    | 0.38542000  | -1.83935100 | -0.03291300 |
| H    | 1.00308400  | -1.20681600 | -0.69837100 |
| C    | -0.38401800 | -2.85564300 | -0.86647700 |
| H    | -1.03080800 | -3.44230500 | -0.19591000 |
| H    | -1.05846200 | -2.27694700 | -1.51267200 |
| C    | 2.32688000  | -3.48544900 | -0.03699000 |
| H    | 3.01511000  | -3.97745700 | 0.66269800  |
| H    | 2.90556900  | -2.82473200 | -0.69480800 |
| N    | 1.44752400  | -2.59253000 | 0.79901500  |
| H    | 0.94452800  | -3.22576100 | 1.49991900  |
| C    | 2.34712700  | -1.67082300 | 1.54163200  |
| O    | 3.13552000  | -0.98658100 | 0.94656900  |
| O    | 2.13649300  | -1.82029300 | 2.81541200  |
| C    | 2.96937900  | -1.12819300 | 3.83835800  |
| C    | 2.28949600  | -1.53356100 | 5.13046300  |
| H    | 2.86520800  | -1.15011700 | 5.98242000  |
| H    | 1.27453400  | -1.11793300 | 5.18100500  |
| H    | 2.22415100  | -2.62612700 | 5.20878100  |
| C    | 2.93352500  | 0.37409600  | 3.64343700  |
| H    | 3.41101000  | 0.68114600  | 2.70761200  |
| H    | 1.90871600  | 0.76553800  | 3.66899800  |
| H    | 3.48236200  | 0.83683600  | 4.47454200  |
| C    | 4.37268300  | -1.69610700 | 3.74044200  |
| H    | 4.35549800  | -2.78897500 | 3.84402500  |
| H    | 4.85058000  | -1.42937300 | 2.79098000  |
| H    | 4.98343600  | -1.28685400 | 4.55525400  |
| C    | -0.00917900 | 0.41228100  | 1.12148300  |
| H    | -0.38841800 | 1.14167100  | 0.38879100  |
| H    | 1.08727900  | 0.47355600  | 1.02066800  |
| C    | 0.50218600  | -3.76412100 | -1.70467400 |

|   |             |             |             |
|---|-------------|-------------|-------------|
| H | 1.04308700  | -3.16568100 | -2.45703000 |
| H | -0.11223000 | -4.48560800 | -2.25881200 |
| C | 1.50456900  | -4.48544600 | -0.81825600 |
| H | 0.99172400  | -5.15360600 | -0.11096500 |
| H | 2.19339100  | -5.10239500 | -1.41065600 |

### TS8c

|                                  |              |
|----------------------------------|--------------|
| M06 SCF energy (au)              | -1600.631235 |
| M06 enthalpy (au)                | -1600.075339 |
| M06 free energy (au)             | -1600.170256 |
| M06 SCF energy in solution (au)  | -1601.065265 |
| M06 enthalpy in solution (au)    | -1600.509369 |
| M06 free energy in solution (au) | -1600.604286 |

### Cartesian coordinates

| ATOM | X           | Y           | Z           |
|------|-------------|-------------|-------------|
| Pd   | -1.02892400 | -1.77151900 | 2.70049700  |
| C    | -0.61288600 | -4.73515900 | 2.17952600  |
| O    | -1.45647200 | -3.80632100 | 2.23101400  |
| O    | 0.61263500  | -4.60772100 | 1.86969600  |
| C    | -1.07688300 | -6.12429900 | 2.52877500  |
| H    | -2.16629500 | -6.19895000 | 2.46817500  |
| H    | -0.60196700 | -6.86661000 | 1.87947100  |
| H    | -0.76753700 | -6.34794500 | 3.55848100  |
| C    | -0.31779500 | 1.05127800  | 2.47797100  |
| O    | -0.15153000 | 2.23582900  | 2.73854800  |
| N    | -0.78382700 | 0.09502100  | 3.34764800  |
| C    | -1.09993500 | 0.31968100  | 4.67925600  |
| C    | -1.55847000 | -0.82366300 | 5.41241800  |
| C    | -0.99431300 | 1.52464300  | 5.36776200  |
| C    | -1.90072900 | -0.72560900 | 6.78745500  |
| C    | -1.33345800 | 1.60656700  | 6.73096400  |
| H    | -0.65194600 | 2.39995700  | 4.82736600  |
| C    | -2.08058400 | -3.09288800 | 5.37358500  |
| C    | -2.34959800 | -1.90217000 | 7.42911500  |
| C    | -1.78023600 | 0.51881600  | 7.44291900  |
| H    | -1.23765000 | 2.57161700  | 7.22712800  |
| C    | -2.44459800 | -3.08116300 | 6.73291000  |
| H    | -2.62043400 | -1.85280900 | 8.48424500  |
| H    | -2.04400900 | 0.59524800  | 8.49708500  |
| H    | -2.79248100 | -3.99549200 | 7.20750800  |
| N    | -1.65464600 | -2.01516900 | 4.74716900  |
| H    | -2.14242600 | -4.00043100 | 4.77087700  |
| C    | -0.47119800 | -0.95983800 | 0.88710300  |
| H    | -1.45862000 | -0.88010700 | 0.40422700  |
| C    | 0.39936100  | -1.77973500 | -0.05296100 |
| H    | 0.97596900  | -1.10329700 | -0.71549900 |
| C    | -0.41666600 | -2.73190800 | -0.91839300 |
| H    | -0.99030300 | -3.40559500 | -0.26248400 |
| H    | -1.15655900 | -2.12357600 | -1.45652800 |
| C    | 2.34734100  | -3.32388400 | -0.31398200 |
| H    | 3.09964700  | -3.86370300 | 0.27730000  |
| H    | 2.86617200  | -2.56889800 | -0.92177300 |
| N    | 1.47074700  | -2.60044500 | 0.66331200  |
| H    | 0.95917600  | -3.48635100 | 1.34978200  |
| C    | 2.34859800  | -1.77145000 | 1.49849300  |
| O    | 3.12593700  | -0.98798300 | 1.01658600  |
| O    | 2.16014500  | -2.08570700 | 2.75453600  |
| C    | 2.94470800  | -1.46250000 | 3.84463800  |
| C    | 2.32848900  | -2.09542300 | 5.07712200  |

|   |             |             |             |
|---|-------------|-------------|-------------|
| H | 2.82974900  | -1.71912200 | 5.97785800  |
| H | 1.25993900  | -1.84876400 | 5.13892800  |
| H | 2.43166300  | -3.18760700 | 5.04553000  |
| C | 2.75277400  | 0.04140800  | 3.85143300  |
| H | 3.16028600  | 0.51340300  | 2.95169600  |
| H | 1.69060600  | 0.29951900  | 3.94689000  |
| H | 3.27892800  | 0.45468500  | 4.72214000  |
| C | 4.39832200  | -1.86535500 | 3.67930900  |
| H | 4.49152500  | -2.95791000 | 3.62124300  |
| H | 4.84078200  | -1.41760500 | 2.78302800  |
| H | 4.96795300  | -1.52207700 | 4.55258600  |
| C | 0.06411600  | 0.45464300  | 1.13913200  |
| H | -0.24321500 | 1.16078300  | 0.35142300  |
| H | 1.16548500  | 0.47789500  | 1.11613500  |
| C | 0.43539000  | -3.51810100 | -1.90360800 |
| H | 0.89010000  | -2.82113900 | -2.62749900 |
| H | -0.18825800 | -4.21121200 | -2.48356000 |
| C | 1.53504300  | -4.27136700 | -1.17213900 |
| H | 1.10319900  | -5.05500000 | -0.53336700 |
| H | 2.21542800  | -4.76699600 | -1.87776600 |

### IM3c

|                                  |              |
|----------------------------------|--------------|
| M06 SCF energy (au)              | -1950.589407 |
| M06 enthalpy (au)                | -1949.826320 |
| M06 free energy (au)             | -1949.933556 |
| M06 SCF energy in solution (au)  | -1951.114099 |
| M06 enthalpy in solution (au)    | -1950.351012 |
| M06 free energy in solution (au) | -1950.458248 |

### Cartesian coordinates

| ATOM | X           | Y           | Z           |
|------|-------------|-------------|-------------|
| Pd   | -0.19757400 | -3.89618400 | 2.01312800  |
| C    | -1.71319700 | -5.35105800 | -0.13823300 |
| O    | -0.62442800 | -5.28006000 | 0.43270000  |
| O    | -2.72783000 | -4.57718300 | 0.20884500  |
| C    | 0.03548000  | -1.32912200 | 3.35242500  |
| O    | 0.38486200  | -0.43880800 | 4.11338200  |
| N    | 0.29634200  | -2.67225400 | 3.50175500  |
| C    | 0.95327300  | -3.25688100 | 4.57058600  |
| C    | 1.05747500  | -4.68657600 | 4.53438200  |
| C    | 1.50764300  | -2.59570000 | 5.66178700  |
| C    | 1.72506300  | -5.39603800 | 5.56905200  |
| C    | 2.15421100  | -3.31320500 | 6.68433000  |
| H    | 1.43117500  | -1.51470100 | 5.70323700  |
| C    | 0.60029500  | -6.66029500 | 3.38657400  |
| C    | 1.81033900  | -6.80062000 | 5.44161200  |
| C    | 2.27473900  | -4.68241200 | 6.65568900  |
| H    | 2.57528600  | -2.75352000 | 7.51851000  |
| C    | 1.25457300  | -7.43696400 | 4.35974200  |
| H    | 2.32522200  | -7.36655100 | 6.21853600  |
| H    | 2.78724900  | -5.22705100 | 7.44762500  |
| H    | 1.30906500  | -8.51658600 | 4.24370900  |
| N    | 0.50932200  | -5.34772200 | 3.46810400  |
| H    | 0.14298400  | -7.12148900 | 2.50916000  |
| C    | -0.49838300 | -2.10791200 | 1.00810100  |
| H    | -1.34228600 | -2.16359200 | 0.30215900  |
| C    | 0.79933000  | -1.83024900 | 0.23155000  |
| H    | 1.65465800  | -2.06910300 | 0.87347400  |
| C    | 0.98293600  | -0.37837000 | -0.23423200 |
| H    | 0.92482200  | 0.29863800  | 0.62756700  |

|   |             |             |             |
|---|-------------|-------------|-------------|
| H | 2.00743000  | -0.28871700 | -0.63015000 |
| C | 0.01675000  | -2.38595000 | -2.07613100 |
| H | -1.03829800 | -2.58334600 | -1.80666300 |
| H | 0.27576200  | -3.06855700 | -2.89068300 |
| N | 0.88912500  | -2.70441500 | -0.95301900 |
| H | -2.40127600 | -4.00140200 | 0.94417700  |
| C | 1.59876700  | -3.87377300 | -0.99678600 |
| O | 1.57406900  | -4.65579000 | -1.93651900 |
| O | 2.33462500  | -4.03330400 | 0.11680900  |
| C | 3.27953700  | -5.12891500 | 0.26269300  |
| C | 3.79348100  | -4.93118200 | 1.67986000  |
| H | 4.56446500  | -5.67773400 | 1.91114600  |
| H | 4.22954300  | -3.93076400 | 1.79623200  |
| H | 2.97474200  | -5.03439300 | 2.40639500  |
| C | 4.40232900  | -4.96264500 | -0.74761700 |
| H | 4.02372000  | -5.05414700 | -1.77111700 |
| H | 4.88097900  | -3.98151700 | -0.62962000 |
| H | 5.16463100  | -5.73673800 | -0.58589200 |
| C | 2.59911600  | -6.48268900 | 0.13469300  |
| H | 1.68783600  | -6.50980700 | 0.74700200  |
| H | 2.32869700  | -6.70006200 | -0.90263200 |
| H | 3.28416200  | -7.26305300 | 0.49479100  |
| C | -0.81229900 | -1.10169500 | 2.11352900  |
| H | -1.85788400 | -1.24076700 | 2.43260600  |
| H | -0.72835800 | -0.04855200 | 1.80760900  |
| C | -0.00117600 | 0.01127700  | -1.32675800 |
| H | 0.16196600  | 1.05195000  | -1.63861000 |
| H | -1.03498500 | -0.04268900 | -0.94553700 |
| C | 0.16629300  | -0.93494000 | -2.50777400 |
| H | -0.56239700 | -0.71926900 | -3.30181700 |
| H | 1.16947000  | -0.79636000 | -2.94180800 |
| C | -1.96650300 | -6.28454200 | -1.28501200 |
| C | -0.85949800 | -7.34527300 | -1.35169100 |
| C | -3.34283400 | -6.96194600 | -1.17137400 |
| C | -1.91810900 | -5.44692000 | -2.58573000 |
| H | -0.84550300 | -7.92729600 | -0.41440800 |
| H | 0.11361400  | -6.84064600 | -1.43664400 |
| C | -1.09468200 | -8.26285100 | -2.55202500 |
| H | -4.13433500 | -6.19995500 | -1.12185700 |
| H | -3.39442700 | -7.54407600 | -0.23634700 |
| C | -3.56044400 | -7.87784200 | -2.37876500 |
| H | -0.92997000 | -4.96567300 | -2.65854300 |
| H | -2.68457500 | -4.65603500 | -2.54739500 |
| C | -2.15096400 | -6.36449800 | -3.78835700 |
| H | -0.30140700 | -9.02473900 | -2.57966700 |
| C | -2.46064800 | -8.94172200 | -2.42434600 |
| C | -1.05065200 | -7.42760300 | -3.83461800 |
| H | -4.54402000 | -8.36226000 | -2.28425200 |
| C | -3.51736500 | -7.04294200 | -3.66180300 |
| H | -2.12009100 | -5.75681300 | -4.70524800 |
| H | -2.49356300 | -9.55941300 | -1.51207600 |
| H | -2.62855100 | -9.61879000 | -3.27701800 |
| H | -0.06548500 | -6.94523900 | -3.93523600 |
| H | -1.19081700 | -8.07595500 | -4.71422800 |
| H | -3.69936500 | -7.68801400 | -4.53601800 |
| H | -4.31806800 | -6.28597200 | -3.64790400 |

**TS3c**

M06 SCF energy (au) -1950.564045  
M06 enthalpy (au) -1949.806268

|                                  |              |
|----------------------------------|--------------|
| M06 free energy (au)             | -1949.910024 |
| M06 SCF energy in solution (au)  | -1951.085250 |
| M06 enthalpy in solution (au)    | -1950.327473 |
| M06 free energy in solution (au) | -1950.431229 |

Cartesian coordinates

| ATOM | X           | Y           | Z           |
|------|-------------|-------------|-------------|
| Pd   | -0.23427300 | -3.66543400 | 1.98700400  |
| C    | -1.48041400 | -4.80200000 | -0.31416200 |
| O    | -0.77695200 | -5.18071400 | 0.67272700  |
| O    | -1.83113100 | -3.59842100 | -0.46674800 |
| C    | 0.28559000  | -1.03877100 | 3.15713200  |
| O    | 0.72304700  | -0.15799100 | 3.88331300  |
| N    | 0.39393500  | -2.38695000 | 3.38155000  |
| C    | 0.93830100  | -2.97824800 | 4.50962900  |
| C    | 0.84694400  | -4.40024000 | 4.53705600  |
| C    | 1.53637300  | -2.34802300 | 5.59389700  |
| C    | 1.35367700  | -5.16112000 | 5.62003200  |
| C    | 2.03202300  | -3.10872700 | 6.67043500  |
| H    | 1.61084100  | -1.26605400 | 5.59235000  |
| C    | 0.14433000  | -6.32609400 | 3.40961000  |
| C    | 1.22697300  | -6.56572200 | 5.53419600  |
| C    | 1.95494400  | -4.48194900 | 6.70209200  |
| H    | 2.49501500  | -2.57938700 | 7.50190800  |
| C    | 0.62825700  | -7.14772000 | 4.44271500  |
| H    | 1.61251900  | -7.17875100 | 6.34905700  |
| H    | 2.35018000  | -5.05478200 | 7.53960900  |
| H    | 0.52166200  | -8.22625600 | 4.36155200  |
| N    | 0.25708900  | -5.01167900 | 3.46280200  |
| H    | -0.33199900 | -6.73003300 | 2.51576600  |
| C    | -0.27578500 | -1.76348800 | 0.76054200  |
| H    | -0.94489600 | -1.41673700 | -0.04726400 |
| C    | 1.15463300  | -1.77792900 | 0.18344600  |
| H    | 1.84622800  | -2.14955400 | 0.94540700  |
| C    | 1.65904600  | -0.39758100 | -0.25696700 |
| H    | 1.58589800  | 0.31114100  | 0.57921000  |
| H    | 2.73254600  | -0.50174300 | -0.48146200 |
| C    | 0.59488900  | -2.26848800 | -2.20276400 |
| H    | -0.50026500 | -2.25812900 | -2.07212900 |
| H    | 0.81906600  | -3.02766200 | -2.95767200 |
| N    | 1.23500000  | -2.69657300 | -0.96067800 |
| H    | -1.08698900 | -2.86909800 | 0.42764800  |
| C    | 1.81887000  | -3.93399200 | -0.91798600 |
| O    | 1.79788600  | -4.73183900 | -1.84175500 |
| O    | 2.42440200  | -4.14902500 | 0.26509400  |
| C    | 3.20496600  | -5.35544900 | 0.50054500  |
| C    | 3.61972700  | -5.20051300 | 1.95477500  |
| H    | 4.27640900  | -6.02874600 | 2.25121600  |
| H    | 4.15905300  | -4.25631100 | 2.10448100  |
| H    | 2.73899200  | -5.20009100 | 2.61150100  |
| C    | 4.42574200  | -5.35229100 | -0.40455300 |
| H    | 4.13314400  | -5.41432600 | -1.45764900 |
| H    | 5.01561200  | -4.43914300 | -0.24938100 |
| H    | 5.06293400  | -6.21503100 | -0.16746100 |
| C    | 2.36572500  | -6.61092300 | 0.31880800  |
| H    | 1.38953200  | -6.49329900 | 0.80870600  |
| H    | 2.19259300  | -6.82702700 | -0.73946400 |
| H    | 2.88906700  | -7.46312500 | 0.77495000  |
| C    | -0.50700200 | -0.76383800 | 1.89623200  |
| H    | -1.57113500 | -0.79283900 | 2.17857800  |



|   |             |             |             |
|---|-------------|-------------|-------------|
| H | -0.30634900 | 0.26872800  | 1.57792800  |
| C | 0.94686000  | 0.11842000  | -1.49996500 |
| H | 1.35991300  | 1.09202200  | -1.79686500 |
| H | -0.12226200 | 0.29041400  | -1.28791000 |
| C | 1.09387500  | -0.89545700 | -2.62791200 |
| H | 0.54723000  | -0.57371600 | -3.52528900 |
| H | 2.15707700  | -0.97320900 | -2.90672500 |
| C | -1.91583800 | -5.82915300 | -1.33618800 |
| C | -1.21425100 | -7.17638500 | -1.12750200 |
| C | -3.44044300 | -6.02310800 | -1.21392900 |
| C | -1.58991800 | -5.31127700 | -2.74998900 |
| H | -1.41621200 | -7.55039700 | -0.11058300 |
| H | -0.12520300 | -7.03152600 | -1.20759200 |
| C | -1.69792100 | -8.18484700 | -2.17174800 |
| H | -3.94398200 | -5.05398600 | -1.35058200 |
| H | -3.68637200 | -6.38004800 | -0.19938500 |
| C | -3.91746700 | -7.03274500 | -2.26066700 |
| H | -0.50158700 | -5.15301800 | -2.83240500 |
| H | -2.07902700 | -4.33738300 | -2.90231400 |
| C | -2.07092500 | -6.32091100 | -3.79423700 |
| H | -1.18943400 | -9.14710000 | -2.00604100 |
| C | -3.21156700 | -8.37307900 | -2.03817300 |
| C | -1.36825600 | -7.66242100 | -3.57246800 |
| H | -5.00602500 | -7.16460100 | -2.16219100 |
| C | -3.58481000 | -6.50933900 | -3.66107700 |
| H | -1.83218700 | -5.93890100 | -4.79858500 |
| H | -3.45744500 | -8.76881700 | -1.03911000 |
| H | -3.56753200 | -9.11236700 | -2.77376300 |
| H | -0.27906100 | -7.53938600 | -3.68200000 |
| H | -1.69219800 | -8.39028900 | -4.33402300 |
| H | -3.94645100 | -7.21917600 | -4.42256100 |
| H | -4.10243300 | -5.55307400 | -3.83971200 |

#### IM4c

|                                  |              |
|----------------------------------|--------------|
| M06 SCF energy (au)              | -1950.603365 |
| M06 enthalpy (au)                | -1949.839912 |
| M06 free energy (au)             | -1949.947225 |
| M06 SCF energy in solution (au)  | -1951.118409 |
| M06 enthalpy in solution (au)    | -1950.354956 |
| M06 free energy in solution (au) | -1950.462269 |

#### Cartesian coordinates

| ATOM | X           | Y           | Z           |
|------|-------------|-------------|-------------|
| Pd   | -2.24272000 | -1.29821100 | 0.46025500  |
| C    | -2.10091400 | -0.92296100 | 2.89378800  |
| O    | -1.14936800 | -0.56922500 | 2.12873300  |
| O    | -3.08075600 | -1.54755100 | 2.35598000  |
| C    | -0.17635100 | -0.18142300 | -1.48809700 |
| O    | 0.13842300  | 0.38702500  | -2.52780300 |
| N    | -1.35904800 | -0.87804800 | -1.33158700 |
| C    | -2.17963700 | -1.16588600 | -2.41989300 |
| C    | -3.39712400 | -1.82454400 | -2.09240700 |
| C    | -1.95280200 | -0.92479800 | -3.77395600 |
| C    | -4.33690000 | -2.24465500 | -3.06769500 |
| C    | -2.88281100 | -1.34425800 | -4.74441700 |
| H    | -1.05265100 | -0.40370100 | -4.07310700 |
| C    | -4.74132400 | -2.63076200 | -0.34802600 |
| C    | -5.50574700 | -2.88649100 | -2.60314200 |
| C    | -4.05320400 | -1.99245600 | -4.42571600 |
| H    | -2.65442100 | -1.13626700 | -5.78882700 |

|   |             |             |             |
|---|-------------|-------------|-------------|
| C | -5.71166500 | -3.08104500 | -1.25778700 |
| H | -6.24441200 | -3.22184000 | -3.33118400 |
| H | -4.76210400 | -2.30461200 | -5.19085900 |
| H | -6.60709400 | -3.57001800 | -0.88387100 |
| N | -3.63806400 | -2.03548900 | -0.76671800 |
| H | -4.84910500 | -2.74347700 | 0.73016900  |
| C | 1.77333900  | 0.92505300  | -0.33020400 |
| H | 2.57007700  | 0.71811300  | 0.39930500  |
| C | 1.11615000  | 2.27589500  | -0.04451100 |
| H | 0.35328200  | 2.43971700  | -0.81190600 |
| C | 2.11991800  | 3.43022000  | -0.10149400 |
| H | 1.55807000  | 4.37804300  | -0.11685700 |
| H | 2.67605300  | 3.37174700  | -1.04831700 |
| C | 1.27367500  | 2.32039900  | 2.44249400  |
| H | 0.61593600  | 2.41756600  | 3.31040700  |
| H | 1.79785400  | 1.35149200  | 2.52864000  |
| N | 0.42834200  | 2.30397700  | 1.25722600  |
| C | -0.92571800 | 2.38079100  | 1.42195000  |
| O | -1.47935600 | 2.57541500  | 2.49379900  |
| O | -1.56859300 | 2.21020400  | 0.24991800  |
| C | -2.94075600 | 2.65382900  | 0.06628500  |
| C | -3.18432400 | 2.36336000  | -1.40546000 |
| H | -4.19140600 | 2.69010000  | -1.69607100 |
| H | -3.09054200 | 1.28694100  | -1.60508300 |
| H | -2.44928700 | 2.88671000  | -2.03071000 |
| C | -3.91187900 | 1.86359600  | 0.92842100  |
| H | -3.78323800 | 2.08798800  | 1.99100400  |
| H | -3.76863900 | 0.78256500  | 0.77681700  |
| H | -4.94109100 | 2.11360100  | 0.63402300  |
| C | -3.03129200 | 4.14599700  | 0.34332100  |
| H | -2.31321500 | 4.69418000  | -0.28146500 |
| H | -2.82747700 | 4.36484400  | 1.39709900  |
| H | -4.03962100 | 4.50759300  | 0.10163000  |
| C | 0.78760900  | -0.22928000 | -0.32188100 |
| H | 1.32858000  | -1.18511700 | -0.41934300 |
| H | 0.27103400  | -0.27825800 | 0.64020100  |
| C | 3.07006800  | 3.44211300  | 1.09059200  |
| H | 3.71865100  | 2.55124200  | 1.07040100  |
| H | 3.74051000  | 4.31083700  | 1.03201500  |
| C | 2.27393000  | 3.46650100  | 2.38880200  |
| H | 1.71895200  | 4.41602200  | 2.45905400  |
| H | 2.93827800  | 3.41518500  | 3.26300400  |
| H | 2.25271200  | 0.99258000  | -1.31649800 |
| C | -2.11524900 | -0.59064100 | 4.35544000  |
| C | -2.48150100 | -1.83457900 | 5.18367300  |
| C | -3.19252200 | 0.49607500  | 4.57884600  |
| C | -0.75875000 | -0.04165200 | 4.81275800  |
| H | -3.45009200 | -2.23195300 | 4.84544400  |
| H | -1.73049600 | -2.62488400 | 5.01754700  |
| C | -2.53922200 | -1.46402500 | 6.66777800  |
| H | -2.93170400 | 1.38133700  | 3.97845700  |
| H | -4.16759700 | 0.12126700  | 4.22873300  |
| C | -3.25351700 | 0.85751500  | 6.06395100  |
| H | 0.02905200  | -0.79038500 | 4.62923600  |
| H | -0.51411800 | 0.84489800  | 4.21048200  |
| C | -0.82248300 | 0.31928300  | 6.29805500  |
| H | -2.79470000 | -2.36134700 | 7.25224300  |
| C | -3.60651500 | -0.38705900 | 6.88259400  |
| C | -1.17751800 | -0.92530500 | 7.11585700  |
| H | -4.02356600 | 1.63022600  | 6.21150300  |

|   |             |             |            |
|---|-------------|-------------|------------|
| C | -1.89085000 | 1.39597800  | 6.50852500 |
| H | 0.15819000  | 0.70438800  | 6.61718100 |
| H | -4.59556900 | -0.76958600 | 6.58231100 |
| H | -3.67114400 | -0.13040100 | 7.95242300 |
| H | -0.40294000 | -1.69831200 | 6.98355000 |
| H | -1.20586800 | -0.67837200 | 8.18953200 |
| H | -1.92841700 | 1.69076200  | 7.56986400 |
| H | -1.63597300 | 2.29603300  | 5.92594800 |

#### TS4c

|                                  |              |
|----------------------------------|--------------|
| M06 SCF energy (au)              | -1371.618848 |
| M06 enthalpy (au)                | -1371.133180 |
| M06 free energy (au)             | -1371.217006 |
| M06 SCF energy in solution (au)  | -1371.981952 |
| M06 enthalpy in solution (au)    | -1371.496284 |
| M06 free energy in solution (au) | -1371.580110 |

#### Cartesian coordinates

| ATOM | X           | Y           | Z           |
|------|-------------|-------------|-------------|
| Pd   | 0.24215200  | -3.90467200 | 2.39854400  |
| C    | 0.91068800  | -1.29571000 | 3.50149900  |
| O    | 1.18963900  | -0.34640800 | 4.21611400  |
| N    | 0.50514900  | -2.54232400 | 3.90163300  |
| C    | 0.47843400  | -3.02428200 | 5.19034100  |
| C    | 0.29939300  | -4.44597000 | 5.29532800  |
| C    | 0.61708100  | -2.29324600 | 6.36380800  |
| C    | 0.24678300  | -5.07233200 | 6.56905500  |
| C    | 0.56865200  | -2.93049400 | 7.61674700  |
| H    | 0.76815600  | -1.22108200 | 6.28735100  |
| C    | 0.02382000  | -6.49028500 | 4.21064800  |
| C    | 0.05922300  | -6.47164900 | 6.60049200  |
| C    | 0.38230100  | -4.28733900 | 7.73584300  |
| H    | 0.67738400  | -2.32138600 | 8.51320700  |
| C    | -0.05552100 | -7.18211000 | 5.43223800  |
| H    | 0.00959000  | -6.97285300 | 7.56763400  |
| H    | 0.33744100  | -4.77272500 | 8.71002400  |
| H    | -0.19917600 | -8.25968200 | 5.43150100  |
| N    | 0.19352800  | -5.18231200 | 4.13984000  |
| H    | -0.04900800 | -7.01721100 | 3.26036000  |
| C    | 0.17110000  | -2.23132700 | 1.25349200  |
| H    | -0.88129300 | -1.92720100 | 1.19869900  |
| C    | 0.51995000  | -3.27814600 | 0.32043400  |
| H    | 0.26519100  | -4.72355100 | 0.96078900  |
| C    | 1.93567000  | -3.39233100 | -0.21465200 |
| H    | 2.66861500  | -3.28727300 | 0.59613900  |
| H    | 2.06996300  | -4.39921200 | -0.63719800 |
| C    | -0.32944800 | -2.32888000 | -1.71772600 |
| H    | -0.47517100 | -1.39094200 | -1.16285500 |
| H    | -1.13074000 | -2.40720500 | -2.45441700 |
| N    | -0.45403400 | -3.43656300 | -0.75393000 |
| C    | -0.75083200 | -4.70411500 | -1.22537400 |
| O    | -0.43292700 | -5.73847400 | -0.66814000 |
| O    | -1.45922200 | -4.63068100 | -2.36063400 |
| C    | -1.88457500 | -5.84430500 | -3.05466400 |
| C    | -2.61576800 | -5.29160700 | -4.26571500 |
| H    | -2.99700700 | -6.11506800 | -4.88269500 |
| H    | -3.46376800 | -4.66857200 | -3.95486000 |
| H    | -1.94233200 | -4.68044100 | -4.88021500 |
| C    | -2.83454500 | -6.64594500 | -2.18163900 |
| H    | -2.32467700 | -7.05779000 | -1.30617900 |

|   |             |             |             |
|---|-------------|-------------|-------------|
| H | -3.66543800 | -6.01246400 | -1.84448300 |
| H | -3.25471000 | -7.47411300 | -2.76796900 |
| C | -0.67286600 | -6.65079000 | -3.49074400 |
| H | 0.01861200  | -6.01698300 | -4.06302300 |
| H | -0.14106600 | -7.07539300 | -2.63458000 |
| H | -0.99810300 | -7.47121800 | -4.14416200 |
| C | 1.06349500  | -1.23541400 | 1.96495600  |
| H | 0.86023100  | -0.20695900 | 1.63348100  |
| H | 2.12661400  | -1.42879100 | 1.75444100  |
| C | 2.14828600  | -2.32473400 | -1.29452300 |
| H | 3.13720800  | -2.45083900 | -1.75557500 |
| H | 2.14806000  | -1.32983500 | -0.81898000 |
| C | 1.05264200  | -2.36638700 | -2.35783300 |
| H | 1.16653300  | -1.53086400 | -3.06259500 |
| H | 1.13513200  | -3.29520200 | -2.94782800 |

### IM1d

|                                  |              |
|----------------------------------|--------------|
| M06 SCF energy (au)              | -1639.926977 |
| M06 enthalpy (au)                | -1639.336758 |
| M06 free energy (au)             | -1639.438431 |
| M06 SCF energy in solution (au)  | -1640.375994 |
| M06 enthalpy in solution (au)    | -1639.785775 |
| M06 free energy in solution (au) | -1639.887448 |

### Cartesian coordinates

| ATOM | X           | Y           | Z           |
|------|-------------|-------------|-------------|
| Pd   | -1.08348100 | -3.40166500 | 2.25437800  |
| C    | -1.68160400 | -5.90086600 | 0.93212400  |
| O    | -2.35405700 | -5.21539400 | 0.17292800  |
| O    | -0.93202700 | -5.42734500 | 1.89334600  |
| C    | -1.61036300 | -7.40567000 | 0.79516800  |
| H    | -2.58177900 | -7.79358300 | 0.47133200  |
| H    | -0.88078300 | -7.65529500 | 0.01242800  |
| H    | -1.29431000 | -7.88562400 | 1.72918700  |
| C    | -1.39394900 | -0.50378300 | 1.93053400  |
| O    | -1.54178900 | 0.67911400  | 2.18916800  |
| N    | -1.32746400 | -1.51857500 | 2.85010700  |
| C    | -1.60006100 | -1.37749500 | 4.21001200  |
| C    | -1.79648400 | -2.60251900 | 4.90974100  |
| C    | -1.71890900 | -0.19542400 | 4.92676400  |
| C    | -2.10093000 | -2.62973100 | 6.29245800  |
| C    | -2.02335000 | -0.22693800 | 6.30241800  |
| H    | -1.58489500 | 0.74765600  | 4.40871700  |
| C    | -1.85898800 | -4.94147800 | 4.77254400  |
| C    | -2.27215800 | -3.89848800 | 6.89116400  |
| C    | -2.21065300 | -1.40429400 | 6.98647200  |
| H    | -2.10747300 | 0.72091300  | 6.83150700  |
| C    | -2.15162900 | -5.04459800 | 6.14367300  |
| H    | -2.49991800 | -3.94975100 | 7.95601100  |
| H    | -2.43913900 | -1.41274100 | 8.05115800  |
| H    | -2.27334300 | -6.03126300 | 6.58494600  |
| N    | -1.68860100 | -3.76680300 | 4.19412900  |
| H    | -1.75065200 | -5.82175800 | 4.13690400  |
| C    | -0.84192800 | -2.40796700 | 0.28183200  |
| H    | -1.40115700 | -3.06989400 | -0.38418700 |
| C    | 0.42260100  | -2.79564800 | 0.67630100  |
| H    | 1.02880700  | -2.06522200 | 1.22812600  |
| C    | 1.15876800  | -4.00196800 | 0.18496200  |
| H    | 0.43924600  | -4.72287000 | -0.22857300 |
| H    | 1.79337100  | -3.68620200 | -0.66079100 |

|   |             |              |             |
|---|-------------|--------------|-------------|
| C | 2.37282400  | -6.67784400  | 3.51797000  |
| H | 2.86077400  | -7.34122200  | 4.24074000  |
| H | 2.52697100  | -5.64723600  | 3.87450100  |
| N | 0.95791200  | -6.98494500  | 3.55864200  |
| H | 0.29500600  | -6.43523300  | 3.00702000  |
| C | 0.47327300  | -8.03367500  | 4.26841700  |
| O | 1.13535900  | -8.84441000  | 4.88634500  |
| O | -0.88666400 | -8.02783000  | 4.19278800  |
| C | -1.66273300 | -9.14024100  | 4.71582400  |
| C | -3.09229600 | -8.73141000  | 4.40067600  |
| H | -3.79135000 | -9.51271000  | 4.72548200  |
| H | -3.35612100 | -7.79900400  | 4.91953800  |
| H | -3.22482100 | -8.57232900  | 3.32234700  |
| C | -1.47199400 | -9.27562500  | 6.21829300  |
| H | -0.45333100 | -9.58632200  | 6.46452400  |
| H | -1.67510900 | -8.31722800  | 6.71646900  |
| H | -2.18022900 | -10.01706300 | 6.61229300  |
| C | -1.30114200 | -10.42002600 | 3.97991100  |
| H | -1.43281100 | -10.28821200 | 2.89717600  |
| H | -0.26526100 | -10.71109900 | 4.17968600  |
| H | -1.96306400 | -11.23359000 | 4.30563700  |
| C | -1.35316300 | -1.00351800  | 0.48981300  |
| H | -2.38551300 | -0.92824000  | 0.12103100  |
| H | -0.76987600 | -0.28287300  | -0.10056900 |
| C | 2.99865000  | -6.85576500  | 2.13732400  |
| H | 4.03927900  | -6.49701100  | 2.18954900  |
| H | 3.04669600  | -7.92946100  | 1.90322200  |
| C | 2.02209400  | -4.65425800  | 1.26753300  |
| H | 1.51424900  | -4.52443700  | 2.23545500  |
| H | 2.98493500  | -4.12448700  | 1.35938500  |
| C | 2.25341600  | -6.13722000  | 1.01705700  |
| H | 1.27045900  | -6.61534400  | 0.88018500  |
| H | 2.79338200  | -6.27600800  | 0.06715600  |

### TS1d

|                                  |              |
|----------------------------------|--------------|
| M06 SCF energy (au)              | -1639.872475 |
| M06 enthalpy (au)                | -1639.287275 |
| M06 free energy (au)             | -1639.387529 |
| M06 SCF energy in solution (au)  | -1640.328767 |
| M06 enthalpy in solution (au)    | -1639.743567 |
| M06 free energy in solution (au) | -1639.843821 |

### Cartesian coordinates

| ATOM | X           | Y           | Z          |
|------|-------------|-------------|------------|
| Pd   | -1.51046900 | -2.14558900 | 1.20463200 |
| C    | -5.37768600 | -4.23931800 | 2.18676500 |
| O    | -5.25847200 | -3.02201700 | 2.35322400 |
| O    | -4.50249600 | -4.99478200 | 1.60553300 |
| C    | -6.59309300 | -4.97973300 | 2.70699500 |
| H    | -6.28869300 | -5.66793500 | 3.50681900 |
| H    | -7.33811300 | -4.27978300 | 3.09614000 |
| H    | -7.03158700 | -5.59662800 | 1.91384100 |
| C    | 0.96652700  | -0.54975300 | 1.64917200 |
| O    | 1.91953500  | -0.06020700 | 2.22914700 |
| N    | -0.21897000 | -0.93677700 | 2.22410400 |
| C    | -0.43607900 | -0.86871000 | 3.60079900 |
| C    | -1.34547600 | -1.82618200 | 4.10227600 |
| C    | 0.15621400  | 0.01740000  | 4.48674300 |
| C    | -1.62671300 | -1.91010100 | 5.48711300 |
| C    | -0.14741500 | -0.04761500 | 5.85968800 |

|   |             |             |             |
|---|-------------|-------------|-------------|
| H | 0.87231500  | 0.74190400  | 4.11674300  |
| C | -2.69151600 | -3.66399500 | 3.63480900  |
| C | -2.50491300 | -2.93137700 | 5.91259400  |
| C | -1.01572000 | -0.98588600 | 6.36283500  |
| H | 0.32869800  | 0.66500600  | 6.53084500  |
| C | -3.01930500 | -3.80828100 | 4.99656900  |
| H | -2.75066700 | -3.01162000 | 6.97152600  |
| H | -1.24371600 | -1.03527900 | 7.42667900  |
| H | -3.69019600 | -4.61433900 | 5.28288700  |
| N | -1.91132100 | -2.69361000 | 3.19770800  |
| H | -3.07655000 | -4.37509900 | 2.91172400  |
| C | -0.48138300 | -0.70374000 | -0.31033700 |
| H | -0.94380900 | 0.27167700  | -0.12294600 |
| C | -1.14123300 | -1.55268000 | -1.15078300 |
| H | -0.65249000 | -2.48762600 | -1.44699700 |
| N | -2.69666200 | -3.78883400 | 0.33732300  |
| H | -3.50018600 | -4.25879100 | 1.07668400  |
| C | -1.61858500 | -4.68901900 | 0.16314600  |
| O | -1.07704200 | -4.93302700 | -0.89481300 |
| O | -1.28188100 | -5.19917000 | 1.35113600  |
| C | -0.00419700 | -5.87830200 | 1.55250000  |
| C | 0.00672700  | -6.12550200 | 3.05093000  |
| H | 0.91192200  | -6.67683000 | 3.33558500  |
| H | -0.00870600 | -5.17473600 | 3.60170600  |
| H | -0.87020600 | -6.71460800 | 3.34905800  |
| C | 1.13437300  | -4.95005000 | 1.16173100  |
| H | 1.15587400  | -4.76968400 | 0.08118800  |
| H | 1.03486400  | -3.98834600 | 1.68910100  |
| H | 2.09180000  | -5.39968600 | 1.45622800  |
| C | 0.01827100  | -7.19001400 | 0.78813000  |
| H | -0.84885300 | -7.80334100 | 1.06509600  |
| H | 0.00179400  | -7.02274400 | -0.29275300 |
| H | 0.92854800  | -7.74763100 | 1.04625300  |
| C | 0.93131400  | -0.81918600 | 0.15945900  |
| H | 1.56905400  | -0.08336500 | -0.34904600 |
| H | 1.34404600  | -1.81751500 | -0.05179400 |
| C | -2.28908900 | -1.06268600 | -1.99942800 |
| H | -1.83657600 | -0.34264400 | -2.70262600 |
| H | -2.66297000 | -1.87264900 | -2.63349100 |
| C | -4.24552800 | -1.22432500 | -0.31268900 |
| H | -5.17384500 | -0.69160200 | -0.06265500 |
| H | -3.71807300 | -1.30225500 | 0.65150700  |
| C | -3.46304300 | -0.37205200 | -1.30659000 |
| H | -4.14227500 | -0.03912600 | -2.10678300 |
| H | -3.12134500 | 0.54946800  | -0.80868400 |
| C | -4.61836400 | -2.62205600 | -0.79230200 |
| H | -5.38226600 | -3.00579100 | -0.10626200 |
| H | -5.09143500 | -2.56042300 | -1.78723500 |
| C | -3.50551800 | -3.66177000 | -0.89525400 |
| H | -2.84129700 | -3.51001200 | -1.74758900 |
| H | -3.97716700 | -4.64436100 | -1.05562500 |

#### IM2d

|                                  |              |
|----------------------------------|--------------|
| M06 SCF energy (au)              | -1410.925484 |
| M06 enthalpy (au)                | -1410.405841 |
| M06 free energy (au)             | -1410.493261 |
| M06 SCF energy in solution (au)  | -1411.299324 |
| M06 enthalpy in solution (au)    | -1410.779681 |
| M06 free energy in solution (au) | -1410.867101 |

## Cartesian coordinates

| ATOM | X           | Y           | Z           |
|------|-------------|-------------|-------------|
| Pd   | -1.22083000 | -2.31056600 | 2.61124100  |
| C    | 1.09137700  | -0.51776500 | 3.21769600  |
| O    | 1.83089500  | 0.27722400  | 3.77436900  |
| N    | -0.19010800 | -0.84220400 | 3.58388700  |
| C    | -0.79778400 | -0.37267800 | 4.74261600  |
| C    | -2.01354600 | -1.02677000 | 5.09278400  |
| C    | -0.34094500 | 0.63592400  | 5.58286600  |
| C    | -2.73122100 | -0.67561900 | 6.26542900  |
| C    | -1.06300900 | 0.98567900  | 6.73953700  |
| H    | 0.58774800  | 1.13833300  | 5.33890400  |
| C    | -3.57253200 | -2.68079200 | 4.55551000  |
| C    | -3.91447600 | -1.39286300 | 6.54424700  |
| C    | -2.23236000 | 0.35564700  | 7.09027200  |
| H    | -0.67000000 | 1.78198200  | 7.36976900  |
| C    | -4.33345900 | -2.39026300 | 5.70034700  |
| H    | -4.48212600 | -1.14277900 | 7.44065900  |
| H    | -2.78236500 | 0.63209700  | 7.98862100  |
| H    | -5.23543200 | -2.96376900 | 5.89608700  |
| N    | -2.46327200 | -2.02236500 | 4.26339800  |
| H    | -3.85991100 | -3.48350900 | 3.88009600  |
| C    | 0.35612700  | -1.69405500 | 1.14243600  |
| H    | -0.10556700 | -0.85776800 | 0.60452400  |
| C    | 0.00181800  | -2.96473000 | 0.75675600  |
| H    | 0.55572900  | -3.81305300 | 1.17377700  |
| C    | -0.83635300 | -3.21338000 | -0.46506300 |
| H    | -1.69360200 | -2.52368300 | -0.45180300 |
| H    | -0.23029400 | -2.88385100 | -1.32596400 |
| C    | -3.59140900 | -3.75764800 | 1.19202100  |
| H    | -3.58437600 | -2.75329300 | 0.73862000  |
| H    | -4.48738400 | -3.79721800 | 1.83903800  |
| N    | -2.37757100 | -3.89307100 | 1.98014600  |
| C    | -2.26251500 | -4.98797000 | 2.75677700  |
| O    | -3.11642000 | -5.84791800 | 2.94850000  |
| O    | -1.01766700 | -5.01732000 | 3.32641000  |
| C    | -0.73398600 | -5.83300000 | 4.48616600  |
| C    | 0.67080300  | -5.39111700 | 4.86426500  |
| H    | 1.01952800  | -5.92874700 | 5.75578500  |
| H    | 1.37036900  | -5.59138100 | 4.04148400  |
| H    | 0.68579900  | -4.31154600 | 5.07440500  |
| C    | -0.75524100 | -7.30829500 | 4.11897400  |
| H    | -1.76238200 | -7.62245800 | 3.82932700  |
| H    | -0.07245400 | -7.49658700 | 3.27954700  |
| H    | -0.41996100 | -7.91169900 | 4.97393100  |
| C    | -1.70238900 | -5.51332900 | 5.61573800  |
| H    | -1.66635900 | -4.43978400 | 5.85619500  |
| H    | -2.72846100 | -5.78803400 | 5.34768000  |
| H    | -1.41609600 | -6.07116700 | 6.51764100  |
| C    | 1.52148400  | -1.33942000 | 2.01412900  |
| H    | 2.27653200  | -0.77493100 | 1.45143400  |
| H    | 2.00799900  | -2.25507700 | 2.38707400  |
| C    | -3.74778500 | -4.82611000 | 0.10965000  |
| H    | -4.77989900 | -4.77568000 | -0.27049600 |
| H    | -3.65173200 | -5.80439000 | 0.60050400  |
| C    | -1.30448400 | -4.65502900 | -0.71388200 |
| H    | -1.10011000 | -5.27965900 | 0.16741000  |
| H    | -0.70940000 | -5.08118200 | -1.53423600 |
| C    | -2.78903700 | -4.74842300 | -1.07481400 |
| H    | -3.05132300 | -3.88954700 | -1.71691100 |

H -2.95686400 -5.64028600 -1.69634900

### TS2d

M06 SCF energy (au) -1410.902764  
M06 enthalpy (au) -1410.384817  
M06 free energy (au) -1410.469821  
M06 SCF energy in solution (au) -1411.273519  
M06 enthalpy in solution (au) -1410.756465  
M06 free energy in solution (au) -1410.841469

### Cartesian coordinates

| ATOM | X           | Y           | Z           |
|------|-------------|-------------|-------------|
| Pd   | -1.58325100 | -2.02632400 | 2.79357900  |
| C    | 0.79960100  | -0.58201800 | 3.42307200  |
| O    | 1.63837500  | 0.13389700  | 3.94518400  |
| N    | -0.53496900 | -0.63524400 | 3.74670600  |
| C    | -1.14278600 | -0.06093700 | 4.84703000  |
| C    | -2.42547000 | -0.60571500 | 5.17944500  |
| C    | -0.63300300 | 0.95087500  | 5.64894100  |
| C    | -3.15976900 | -0.11337900 | 6.28935200  |
| C    | -1.37273400 | 1.43216900  | 6.74539900  |
| H    | 0.34753000  | 1.35328800  | 5.41559000  |
| C    | -4.07557200 | -2.18637200 | 4.69756600  |
| C    | -4.41062200 | -0.71488500 | 6.55613100  |
| C    | -2.61082000 | 0.92877800  | 7.06940700  |
| H    | -0.94317100 | 2.23102900  | 7.34824400  |
| C    | -4.86904400 | -1.74458900 | 5.77231200  |
| H    | -4.99839400 | -0.35164600 | 7.39965200  |
| H    | -3.17580400 | 1.31226900  | 7.91802500  |
| H    | -5.82311200 | -2.22749000 | 5.96768500  |
| N    | -2.91164600 | -1.63362500 | 4.40969500  |
| H    | -4.38149800 | -3.02641500 | 4.06967900  |
| C    | -0.02162000 | -1.95497700 | 1.42513900  |
| H    | -0.25178900 | -1.16288600 | 0.69966200  |
| C    | -0.35260000 | -3.26557700 | 0.97957800  |
| H    | 0.05536900  | -4.10779200 | 1.54431800  |
| C    | -0.63008200 | -3.51512500 | -0.46460200 |
| H    | -1.16416600 | -2.64963100 | -0.88913000 |
| H    | 0.37622800  | -3.46526600 | -0.91980600 |
| C    | -3.43660700 | -3.35953900 | 0.82565800  |
| H    | -3.19005800 | -2.43433500 | 0.27991000  |
| H    | -4.31452600 | -3.12648600 | 1.44979100  |
| N    | -2.29490600 | -3.67937500 | 1.67593500  |
| C    | -2.50272900 | -4.67743000 | 2.59766700  |
| O    | -3.58993600 | -5.13954300 | 2.90916400  |
| O    | -1.32329500 | -5.08811500 | 3.11552700  |
| C    | -1.26476000 | -5.85724700 | 4.34840800  |
| C    | 0.22496900  | -5.88837800 | 4.64483800  |
| H    | 0.42123200  | -6.46003600 | 5.56092200  |
| H    | 0.77356100  | -6.35876400 | 3.81828800  |
| H    | 0.60783700  | -4.86736400 | 4.78126200  |
| C    | -1.79931700 | -7.26048800 | 4.11742200  |
| H    | -2.86676500 | -7.23962700 | 3.87843800  |
| H    | -1.25979800 | -7.74030900 | 3.28995600  |
| H    | -1.64786700 | -7.86750500 | 5.02040600  |
| C    | -2.00252600 | -5.13280500 | 5.46289000  |
| H    | -1.65221100 | -4.09263800 | 5.53491100  |
| H    | -3.08470000 | -5.13293200 | 5.29725000  |
| H    | -1.79716700 | -5.63041400 | 6.42012600  |
| C    | 1.14588800  | -1.61779600 | 2.34494500  |



|   |             |             |             |
|---|-------------|-------------|-------------|
| H | 2.01667600  | -1.25329200 | 1.78132500  |
| H | 1.47561900  | -2.52428800 | 2.87976400  |
| C | -3.77610600 | -4.47987300 | -0.14991400 |
| H | -4.76619900 | -4.27627700 | -0.58473000 |
| H | -3.88408700 | -5.41095200 | 0.42499800  |
| C | -1.31090300 | -4.82900700 | -0.85907100 |
| H | -1.22585600 | -5.55542500 | -0.03475700 |
| H | -0.75981700 | -5.26329800 | -1.70493800 |
| C | -2.77328600 | -4.67509200 | -1.27974800 |
| H | -2.84245100 | -3.82868900 | -1.98482600 |
| H | -3.07128000 | -5.56416100 | -1.85486800 |

### IM3d

|                                  |              |
|----------------------------------|--------------|
| M06 SCF energy (au)              | -1989.863855 |
| M06 enthalpy (au)                | -1989.071549 |
| M06 free energy (au)             | -1989.182618 |
| M06 SCF energy in solution (au)  | -1990.402307 |
| M06 enthalpy in solution (au)    | -1989.610001 |
| M06 free energy in solution (au) | -1989.721070 |

### Cartesian coordinates

| ATOM | X           | Y           | Z           |
|------|-------------|-------------|-------------|
| Pd   | -1.26054700 | -2.28081000 | 2.83371900  |
| C    | -3.23457100 | -3.84056600 | 1.28988700  |
| O    | -3.74041700 | -2.63623700 | 1.09243600  |
| O    | -2.26347400 | -4.03014300 | 2.02400400  |
| C    | 0.20028200  | 0.20434700  | 2.52085900  |
| O    | 0.84330400  | 1.21868500  | 2.74833900  |
| N    | -0.38852600 | -0.60852600 | 3.46159100  |
| C    | -0.41747000 | -0.38149300 | 4.82647000  |
| C    | -1.16104300 | -1.33090400 | 5.60303100  |
| C    | 0.19081400  | 0.67198100  | 5.50060500  |
| C    | -1.25974600 | -1.19816500 | 7.01459100  |
| C    | 0.07695100  | 0.79337200  | 6.89717600  |
| H    | 0.75518400  | 1.39598100  | 4.92335300  |
| C    | -2.44388300 | -3.27201500 | 5.63146400  |
| C    | -1.99626700 | -2.18306800 | 7.70962700  |
| C    | -0.62638600 | -0.11175500 | 7.65570900  |
| H    | 0.57107600  | 1.63390100  | 7.38289300  |
| C    | -2.58495300 | -3.21989600 | 7.03003200  |
| H    | -2.08381200 | -2.10373400 | 8.79365700  |
| H    | -0.70172400 | -0.01341000 | 8.73796100  |
| H    | -3.15176900 | -3.99102500 | 7.54604700  |
| N    | -1.76897500 | -2.36851100 | 4.94960600  |
| H    | -2.89375400 | -4.07853500 | 5.04979400  |
| C    | -0.33058100 | -1.80254400 | 1.06244500  |
| H    | -0.96944400 | -2.07818300 | 0.20220700  |
| C    | 0.96141300  | -2.62323300 | 0.99874000  |
| H    | 1.53398900  | -2.46241600 | 1.92373500  |
| C    | 1.86607400  | -2.22356700 | -0.17788500 |
| H    | 1.25763700  | -2.02681900 | -1.07857600 |
| H    | 2.32210600  | -1.25922800 | 0.08300000  |
| C    | 0.33267300  | -4.70331900 | -0.29054600 |
| H    | -0.11455400 | -3.94091200 | -0.94807000 |
| H    | -0.44051100 | -5.46074300 | -0.11015400 |
| N    | 0.66879900  | -4.06208900 | 0.97151800  |
| H    | -3.17031900 | -1.99912800 | 1.60421600  |
| C    | 0.68490200  | -4.74635600 | 2.15262100  |
| O    | 0.96003400  | -4.24738100 | 3.23197500  |
| O    | 0.35957600  | -6.04408700 | 1.97022600  |

|   |             |             |             |
|---|-------------|-------------|-------------|
| C | 0.21699700  | -6.92923100 | 3.11629200  |
| C | -0.25479300 | -8.22661900 | 2.47995300  |
| H | -0.36584800 | -9.00487400 | 3.24597400  |
| H | -1.22578800 | -8.08756600 | 1.98407200  |
| H | 0.46901500  | -8.57512400 | 1.73209600  |
| C | -0.83582100 | -6.40429500 | 4.08211500  |
| H | -0.49419000 | -5.49809200 | 4.59228300  |
| H | -1.76262700 | -6.17041200 | 3.53953300  |
| H | -1.05516800 | -7.17678400 | 4.83232300  |
| C | 1.56416700  | -7.13223300 | 3.79020800  |
| H | 2.30372400  | -7.48729700 | 3.05995800  |
| H | 1.92510900  | -6.20179000 | 4.23785300  |
| H | 1.47153100  | -7.89185200 | 4.57834700  |
| C | -0.11187400 | -0.29194900 | 1.11737900  |
| H | -1.04292800 | 0.21758500  | 0.82072000  |
| H | 0.66327100  | 0.07879000  | 0.43052300  |
| C | 1.54772300  | -5.33490900 | -0.95932500 |
| H | 2.03329600  | -5.98806200 | -0.21783100 |
| H | 1.21152300  | -5.98866300 | -1.77887100 |
| C | 2.97040800  | -3.22728700 | -0.51684100 |
| H | 3.35682100  | -3.68125100 | 0.41075200  |
| H | 3.81429800  | -2.68092500 | -0.96215900 |
| C | 2.54425600  | -4.31703800 | -1.50030600 |
| H | 2.10922400  | -3.82559000 | -2.38800500 |
| H | 3.43605200  | -4.85146800 | -1.85993400 |
| C | -3.90361500 | -4.93912900 | 0.51446200  |
| C | -3.34440000 | -6.30436900 | 0.92974600  |
| C | -5.42953700 | -4.92514300 | 0.72493700  |
| C | -3.60889400 | -4.69879500 | -0.98470900 |
| H | -3.54395500 | -6.47230100 | 2.00141700  |
| H | -2.24883300 | -6.30975500 | 0.81492200  |
| C | -3.98696600 | -7.40844100 | 0.08995200  |
| H | -5.83787300 | -3.94515700 | 0.43824300  |
| H | -5.65660700 | -5.07265700 | 1.79359900  |
| C | -6.06955100 | -6.03726100 | -0.11136000 |
| H | -2.51793100 | -4.67799200 | -1.14454700 |
| H | -4.00226200 | -3.71583600 | -1.28407700 |
| C | -4.25072500 | -5.81067100 | -1.81665100 |
| H | -3.57344900 | -8.38049600 | 0.39995000  |
| C | -5.50227500 | -7.39554200 | 0.30983900  |
| C | -3.67938100 | -7.16514200 | -1.39013500 |
| H | -7.15767400 | -6.02182200 | 0.05099400  |
| C | -5.76570900 | -5.79824800 | -1.59316500 |
| H | -4.03014600 | -5.63070300 | -2.87952300 |
| H | -5.73219100 | -7.59123900 | 1.36957600  |
| H | -5.97721000 | -8.19861600 | -0.27561300 |
| H | -2.59003500 | -7.18715800 | -1.55799900 |
| H | -4.11635600 | -7.96824200 | -2.00432400 |
| H | -6.24225900 | -6.58030100 | -2.20505000 |
| H | -6.18840700 | -4.83383100 | -1.91698300 |

### TS3d

|                                  |              |
|----------------------------------|--------------|
| M06 SCF energy (au)              | -1989.838610 |
| M06 enthalpy (au)                | -1989.051703 |
| M06 free energy (au)             | -1989.160774 |
| M06 SCF energy in solution (au)  | -1990.372701 |
| M06 enthalpy in solution (au)    | -1989.585794 |
| M06 free energy in solution (au) | -1989.694865 |

Cartesian coordinates

| ATOM | X           | Y           | Z           |
|------|-------------|-------------|-------------|
| Pd   | -1.38765200 | -2.47065900 | 2.64657200  |
| C    | -2.57187000 | -4.47674400 | 0.98728700  |
| O    | -2.27940300 | -3.62233200 | 0.10556500  |
| O    | -2.30763700 | -4.30618000 | 2.21585900  |
| C    | -0.06007900 | 0.11918800  | 2.37493400  |
| O    | 0.52643800  | 1.15728400  | 2.64707000  |
| N    | -0.56505000 | -0.77329000 | 3.28274600  |
| C    | -0.51054100 | -0.63782500 | 4.66128200  |
| C    | -1.15068200 | -1.68244500 | 5.38859000  |
| C    | 0.07836200  | 0.38898700  | 5.38884700  |
| C    | -1.18835700 | -1.69189500 | 6.80524200  |
| C    | 0.03607400  | 0.37540300  | 6.79641400  |
| H    | 0.56663800  | 1.19498100  | 4.85252200  |
| C    | -2.33688500 | -3.69293600 | 5.26574200  |
| C    | -1.84046900 | -2.78091000 | 7.42494600  |
| C    | -0.57579100 | -0.63082800 | 7.50693300  |
| H    | 0.51114600  | 1.19643800  | 7.33146000  |
| C    | -2.40944100 | -3.77592700 | 6.66753200  |
| H    | -1.88218400 | -2.81782100 | 8.51373800  |
| H    | -0.59420400 | -0.62913800 | 8.59582100  |
| H    | -2.91338400 | -4.62203600 | 7.12755500  |
| N    | -1.73363100 | -2.68602900 | 4.66368000  |
| H    | -2.76583300 | -4.45320300 | 4.61300100  |
| C    | -0.38644500 | -1.82283800 | 0.72835900  |
| H    | -0.67185600 | -1.94053300 | -0.33488400 |
| C    | 0.98558600  | -2.50081100 | 0.88669800  |
| H    | 1.41161400  | -2.21704400 | 1.85769600  |
| C    | 1.97224900  | -2.05251600 | -0.19961500 |
| H    | 1.46104200  | -1.98923100 | -1.17667900 |
| H    | 2.27201600  | -1.02311400 | 0.04265900  |
| C    | 0.75759900  | -4.73303400 | -0.28772000 |
| H    | 0.27354200  | -4.09576400 | -1.04224300 |
| H    | 0.07652100  | -5.57666100 | -0.11874300 |
| N    | 0.86639400  | -3.96037500 | 0.94498000  |
| H    | -1.50923200 | -2.68623000 | 0.71733900  |
| C    | 1.00679400  | -4.56104100 | 2.16695100  |
| O    | 1.21273900  | -3.95997300 | 3.20944500  |
| O    | 0.87771600  | -5.89878100 | 2.06787600  |
| C    | 1.01729000  | -6.73433400 | 3.25263400  |
| C    | 0.75774900  | -8.13106300 | 2.71270600  |
| H    | 0.90037300  | -8.87417000 | 3.50775100  |
| H    | -0.26941200 | -8.22213000 | 2.33469200  |
| H    | 1.45108300  | -8.36073200 | 1.89307400  |
| C    | -0.02573400 | -6.36708200 | 4.29801400  |
| H    | 0.21011900  | -5.41468400 | 4.78238500  |
| H    | -1.01368500 | -6.27977400 | 3.82317500  |
| H    | -0.07280900 | -7.15740900 | 5.06008100  |
| C    | 2.43600900  | -6.63678000 | 3.78945300  |
| H    | 3.15761200  | -6.88884800 | 2.99991900  |
| H    | 2.65160300  | -5.63082400 | 4.16126800  |
| H    | 2.56834500  | -7.35218300 | 4.61231200  |
| C    | -0.36094400 | -0.30980200 | 0.95345900  |
| H    | -1.34688700 | 0.10766500  | 0.69624800  |
| H    | 0.36020700  | 0.18639600  | 0.28802200  |
| C    | 2.11352800  | -5.22689600 | -0.77678700 |
| H    | 2.59387700  | -5.76798300 | 0.05400900  |
| H    | 1.95928200  | -5.96492100 | -1.57863700 |
| C    | 3.21685400  | -2.93087400 | -0.33837200 |
| H    | 3.53847800  | -3.27947700 | 0.65761100  |

|   |             |             |             |
|---|-------------|-------------|-------------|
| H | 4.04074500  | -2.31410000 | -0.72478000 |
| C | 3.03168900  | -4.11981000 | -1.28207200 |
| H | 2.64076600  | -3.73757700 | -2.24097900 |
| H | 4.01482200  | -4.55655700 | -1.51195400 |
| C | -3.27649800 | -5.75710200 | 0.58654200  |
| C | -4.72079300 | -5.71284400 | 1.12492300  |
| C | -3.31556300 | -5.92720400 | -0.93698000 |
| C | -2.55859500 | -6.96376800 | 1.21352400  |
| H | -5.24609300 | -4.84280700 | 0.69739300  |
| H | -4.69935500 | -5.57696600 | 2.21748100  |
| C | -5.45033700 | -7.00773600 | 0.75774200  |
| H | -2.28728000 | -5.93933100 | -1.33337300 |
| H | -3.81560000 | -5.05968200 | -1.39237500 |
| C | -4.04521700 | -7.22201800 | -1.30123600 |
| H | -2.52924400 | -6.84257800 | 2.30753500  |
| H | -1.50975900 | -6.98968900 | 0.86873700  |
| C | -3.28302100 | -8.25829600 | 0.84222400  |
| H | -6.47931600 | -6.96259200 | 1.14607500  |
| C | -5.47828800 | -7.16539500 | -0.76486100 |
| C | -4.71694800 | -8.20114500 | 1.37745700  |
| H | -4.06458500 | -7.32887000 | -2.39647200 |
| C | -3.31255600 | -8.41415200 | -0.68013200 |
| H | -2.75121100 | -9.11068100 | 1.29439300  |
| H | -6.01990700 | -6.32228500 | -1.22297400 |
| H | -6.02181000 | -8.08412400 | -1.03809000 |
| H | -4.70734900 | -8.11148400 | 2.47585100  |
| H | -5.24800200 | -9.13568700 | 1.13532500  |
| H | -3.81699800 | -9.35476300 | -0.95383200 |
| H | -2.28492400 | -8.47293100 | -1.07398100 |

#### IM4d

|                                  |              |
|----------------------------------|--------------|
| M06 SCF energy (au)              | -1989.879895 |
| M06 enthalpy (au)                | -1989.086534 |
| M06 free energy (au)             | -1989.196464 |
| M06 SCF energy in solution (au)  | -1990.406570 |
| M06 enthalpy in solution (au)    | -1989.613209 |
| M06 free energy in solution (au) | -1989.723139 |

#### Cartesian coordinates

| ATOM | X           | Y           | Z          |
|------|-------------|-------------|------------|
| Pd   | -0.80025200 | -2.10843200 | 2.57954700 |
| C    | -0.52782400 | -3.66409000 | 0.67781900 |
| O    | -0.44528600 | -2.41049400 | 0.48985700 |
| O    | -0.76347100 | -4.06436500 | 1.87060600 |
| C    | -0.28177000 | 0.89411500  | 2.40890300 |
| O    | 0.16735200  | 1.93463000  | 2.87672600 |
| N    | -0.74712500 | -0.15248700 | 3.18210700 |
| C    | -0.91617700 | -0.00714900 | 4.55589900 |
| C    | -1.18412100 | -1.21263300 | 5.26095500 |
| C    | -0.88968100 | 1.16013300  | 5.31799200 |
| C    | -1.42416100 | -1.25673500 | 6.65807600 |
| C    | -1.13649900 | 1.12065600  | 6.70308100 |
| H    | -0.66279900 | 2.10173000  | 4.83483800 |
| C    | -1.40263700 | -3.54041900 | 5.07819900 |
| C    | -1.66477100 | -2.52463100 | 7.23146200 |
| C    | -1.40031600 | -0.04690900 | 7.38131200 |
| H    | -1.10938100 | 2.06190400  | 7.25035700 |
| C    | -1.65425400 | -3.65890500 | 6.45489900 |
| H    | -1.85468900 | -2.58803600 | 8.30293800 |
| H    | -1.58137900 | -0.05748300 | 8.45484300 |

|   |             |             |             |
|---|-------------|-------------|-------------|
| H | -1.83273400 | -4.64227600 | 6.88140400  |
| N | -1.18464900 | -2.36029700 | 4.52447700  |
| H | -1.37247400 | -4.40034400 | 4.40983900  |
| C | 0.57987400  | 1.53490000  | 0.12022600  |
| H | 0.55373300  | 2.59063800  | 0.42536700  |
| C | 2.01451400  | 1.03690500  | 0.28147900  |
| H | 2.30277800  | 1.15332500  | 1.33298000  |
| C | 2.97304500  | 1.87779500  | -0.56776600 |
| H | 2.50490100  | 2.11196600  | -1.53969000 |
| H | 3.07779300  | 2.84609900  | -0.05643400 |
| C | 2.20592500  | -0.84783600 | -1.39085900 |
| H | 1.63599100  | -0.13572600 | -2.00605500 |
| H | 1.68859600  | -1.81395800 | -1.45192200 |
| N | 2.14301500  | -0.39704200 | -0.00647600 |
| H | 0.30239400  | 1.50399800  | -0.94613400 |
| C | 2.38658500  | -1.34295100 | 0.94381400  |
| O | 2.69267000  | -2.49795700 | 0.68855400  |
| O | 2.23009000  | -0.85927400 | 2.19453500  |
| C | 3.01568300  | -1.40898000 | 3.28966400  |
| C | 2.69120300  | -0.47426300 | 4.44219400  |
| H | 3.29053700  | -0.73884500 | 5.32338400  |
| H | 2.90297900  | 0.56745500  | 4.16741400  |
| H | 1.62820800  | -0.53838600 | 4.71053700  |
| C | 4.48999300  | -1.31345000 | 2.92738500  |
| H | 4.73162400  | -1.95106900 | 2.06888800  |
| H | 4.75155800  | -0.27289400 | 2.68611900  |
| H | 5.10763200  | -1.63187700 | 3.77747000  |
| C | 2.60176800  | -2.83430600 | 3.62146300  |
| H | 1.51975200  | -2.88063000 | 3.81366200  |
| H | 2.83395000  | -3.52116100 | 2.80251900  |
| H | 3.12599400  | -3.16058400 | 4.53116900  |
| C | -0.44293600 | 0.74105700  | 0.91343300  |
| H | -0.43625800 | -0.30547100 | 0.59876300  |
| H | -1.45427400 | 1.11586800  | 0.68513300  |
| C | 3.63974400  | -0.98347000 | -1.88983400 |
| H | 4.16992600  | -1.63966500 | -1.18381400 |
| H | 3.63226500  | -1.51001000 | -2.85673500 |
| C | 4.34682900  | 1.25679200  | -0.81913600 |
| H | 4.68157000  | 0.70693800  | 0.07778800  |
| H | 5.07803500  | 2.06340200  | -0.97310400 |
| C | 4.38440500  | 0.33781300  | -2.04100700 |
| H | 3.97028000  | 0.89503200  | -2.89937000 |
| H | 5.43138700  | 0.12137500  | -2.30086100 |
| C | -0.33058900 | -4.65070200 | -0.43604400 |
| C | -1.25096100 | -5.86912000 | -0.25650600 |
| C | -0.60505300 | -4.00320800 | -1.80029000 |
| C | 1.14026000  | -5.12553400 | -0.38542300 |
| H | -2.30449900 | -5.54375500 | -0.26621300 |
| H | -1.06660900 | -6.32959300 | 0.72503000  |
| C | -0.99704300 | -6.87916600 | -1.37870300 |
| H | 0.03475500  | -3.11797500 | -1.92765400 |
| H | -1.64736600 | -3.64638800 | -1.83799100 |
| C | -0.34640200 | -5.01659600 | -2.91661500 |
| H | 1.33849900  | -5.57753000 | 0.60030500  |
| H | 1.81181300  | -4.25944100 | -0.47650000 |
| C | 1.38932300  | -6.13784200 | -1.50420300 |
| H | -1.66577800 | -7.74296800 | -1.24243100 |
| C | -1.27160000 | -6.22273700 | -2.73445700 |
| C | 0.46152700  | -7.34252100 | -1.32651500 |
| H | -0.54590100 | -4.54015700 | -3.88871700 |

|   |             |             |             |
|---|-------------|-------------|-------------|
| C | 1.11343500  | -5.47549500 | -2.85705000 |
| H | 2.43878800  | -6.46665000 | -1.46005600 |
| H | -2.32468200 | -5.90303200 | -2.79447300 |
| H | -1.10928200 | -6.95079500 | -3.54561200 |
| H | 0.66686900  | -7.83811400 | -0.36393000 |
| H | 0.64870500  | -8.08580300 | -2.11845500 |
| H | 1.32024900  | -6.18419000 | -3.67530400 |
| H | 1.78622300  | -4.61302300 | -2.99714900 |

#### TS4d

|                                  |              |
|----------------------------------|--------------|
| M06 SCF energy (au)              | -1410.896720 |
| M06 enthalpy (au)                | -1410.380862 |
| M06 free energy (au)             | -1410.468360 |
| M06 SCF energy in solution (au)  | -1411.270193 |
| M06 enthalpy in solution (au)    | -1410.754335 |
| M06 free energy in solution (au) | -1410.841833 |

#### Cartesian coordinates

| ATOM | X           | Y           | Z           |
|------|-------------|-------------|-------------|
| Pd   | -0.74922400 | -2.51133300 | 2.64382200  |
| C    | -0.08604900 | 0.29296200  | 3.09696100  |
| O    | 0.12050200  | 1.39309700  | 3.58165100  |
| N    | -0.67714100 | -0.78065300 | 3.72108900  |
| C    | -1.01862600 | -0.86501500 | 5.05247900  |
| C    | -1.35066900 | -2.18594600 | 5.50950900  |
| C    | -1.05994000 | 0.17446700  | 5.97449600  |
| C    | -1.72973500 | -2.40656000 | 6.86127800  |
| C    | -1.43126400 | -0.06293300 | 7.30991000  |
| H    | -0.79388700 | 1.17123300  | 5.63794700  |
| C    | -1.58593900 | -4.45001400 | 5.01343500  |
| C    | -2.05233700 | -3.72730700 | 7.24194800  |
| C    | -1.76805200 | -1.31743000 | 7.75977700  |
| H    | -1.45476500 | 0.78040300  | 7.99885900  |
| C    | -1.98574800 | -4.74820300 | 6.32767900  |
| H    | -2.35171100 | -3.91773900 | 8.27299300  |
| H    | -2.06255500 | -1.49225100 | 8.79381400  |
| H    | -2.22741700 | -5.77313500 | 6.59773000  |
| N    | -1.28192800 | -3.22755300 | 4.61594100  |
| H    | -1.50684100 | -5.23398200 | 4.26155200  |
| C    | -0.42278700 | -1.22429800 | 1.09969000  |
| H    | -1.40928800 | -0.92532900 | 0.72979500  |
| C    | 0.03412600  | -2.47922300 | 0.55227100  |
| H    | -0.42342500 | -3.64044000 | 1.45279800  |
| C    | 1.51993600  | -2.76380900 | 0.44476900  |
| H    | 1.87496700  | -2.15939300 | -0.40681900 |
| H    | 2.02671400  | -2.37973900 | 1.34086300  |
| C    | -1.25541800 | -4.27465600 | -0.68883800 |
| H    | -1.81583500 | -4.33124300 | -1.62300100 |
| H    | -1.98089600 | -4.39140600 | 0.12982600  |
| N    | -0.72315900 | -2.91915800 | -0.60936500 |
| C    | -0.59794300 | -2.09272400 | -1.70928300 |
| O    | -0.05689500 | -1.00284600 | -1.66696300 |
| O    | -1.13217200 | -2.64987100 | -2.80599500 |
| C    | -1.09138800 | -1.95012300 | -4.08856700 |
| C    | -1.78090800 | -2.93121200 | -5.02072500 |
| H    | -1.81604700 | -2.52133100 | -6.03800000 |
| H    | -1.23939800 | -3.88532600 | -5.04915000 |
| H    | -2.80882700 | -3.12462100 | -4.68875800 |
| C    | 0.34890800  | -1.73228600 | -4.52063100 |
| H    | 0.86058200  | -1.01968400 | -3.86770900 |

|   |             |             |             |
|---|-------------|-------------|-------------|
| H | 0.89607200  | -2.68488400 | -4.50963200 |
| H | 0.36585700  | -1.34417300 | -5.54778200 |
| C | -1.87758900 | -0.65298200 | -4.00909300 |
| H | -2.89354800 | -0.84675200 | -3.64035800 |
| H | -1.39186700 | 0.07165400  | -3.34991300 |
| H | -1.95905200 | -0.21595500 | -5.01330300 |
| C | 0.37662700  | -0.08103800 | 1.67588700  |
| H | 0.30442000  | 0.80255900  | 1.02734700  |
| H | 1.44634600  | -0.32689400 | 1.74713600  |
| C | -0.19773900 | -5.39140700 | -0.62666100 |
| H | -0.21366700 | -5.86131700 | 0.36914600  |
| H | -0.49158300 | -6.18033000 | -1.33354300 |
| C | 1.91034800  | -4.22230000 | 0.24388700  |
| H | 1.71198700  | -4.78157400 | 1.17424300  |
| H | 3.00024400  | -4.25156900 | 0.10212800  |
| C | 1.23490400  | -4.95218800 | -0.91928600 |
| H | 1.26871500  | -4.33316500 | -1.83212900 |
| H | 1.82409600  | -5.85243700 | -1.14529300 |

### TS7a

|                                  |              |
|----------------------------------|--------------|
| M06 SCF energy (au)              | -1522.030325 |
| M06 enthalpy (au)                | -1521.530322 |
| M06 free energy (au)             | -1521.622848 |
| M06 SCF energy in solution (au)  | -1522.451826 |
| M06 enthalpy in solution (au)    | -1521.951823 |
| M06 free energy in solution (au) | -1522.044349 |

### Cartesian coordinates

| ATOM | X           | Y           | Z           |
|------|-------------|-------------|-------------|
| Pd   | -0.87890600 | -2.96539900 | 2.39999100  |
| C    | -2.41254400 | -4.92221500 | 0.95547500  |
| O    | -2.42392700 | -4.11259000 | 0.02141600  |
| O    | -1.73054200 | -4.81930700 | 2.04773400  |
| C    | -3.26096500 | -6.17758500 | 0.89448800  |
| H    | -2.69430100 | -7.04880200 | 1.24179100  |
| H    | -4.12138500 | -6.06404500 | 1.56684600  |
| H    | -3.63128600 | -6.34465900 | -0.12128800 |
| C    | 0.09439000  | -0.10430500 | 1.90166100  |
| O    | 0.30803000  | 1.08357700  | 2.11327100  |
| N    | -0.34160300 | -1.02634900 | 2.80531800  |
| C    | -0.74106300 | -0.62421400 | 4.08808000  |
| C    | -1.63733500 | -1.50333200 | 4.77519200  |
| C    | -0.36013600 | 0.53518200  | 4.75252900  |
| C    | -2.13560800 | -1.19283200 | 6.06814400  |
| C    | -0.84878500 | 0.83091100  | 6.03984200  |
| H    | 0.31030600  | 1.22591700  | 4.25712600  |
| C    | -2.83478000 | -3.50677700 | 4.72638100  |
| C    | -3.02443600 | -2.11706800 | 6.66216900  |
| C    | -1.72227200 | 0.00091100  | 6.69775600  |
| H    | -0.51658500 | 1.75207500  | 6.51670700  |
| C    | -3.37840800 | -3.26675300 | 6.00122600  |
| H    | -3.41946400 | -1.89883700 | 7.65481400  |
| H    | -2.09816200 | 0.23866900  | 7.69222500  |
| H    | -4.05910600 | -3.99051900 | 6.44247600  |
| N    | -2.00770800 | -2.65915300 | 4.14876300  |
| H    | -3.05900600 | -4.40854600 | 4.15554000  |
| C    | -0.07777700 | -1.96688300 | 0.09429900  |
| H    | -1.14636600 | -2.08897600 | -0.12378300 |
| C    | 0.49810500  | -3.07326100 | 0.86554300  |
| H    | 1.46528400  | -2.78078500 | 1.30300200  |

|   |             |             |             |
|---|-------------|-------------|-------------|
| C | 0.65162400  | -4.30034200 | -0.02693800 |
| H | 1.68955600  | -4.65563900 | 0.00964300  |
| H | 0.00998100  | -5.13793700 | 0.26246300  |
| C | 0.28470500  | -3.86264000 | -1.44838900 |
| H | 0.88476800  | -4.32966900 | -2.23619400 |
| H | -0.78123600 | -4.04386300 | -1.62304400 |
| N | 0.44702000  | -2.36847200 | -1.52503400 |
| H | -0.21292100 | -1.93151300 | -2.17183000 |
| C | 1.74728400  | -1.81870000 | -1.84291100 |
| O | 1.84108500  | -0.80348300 | -2.48232600 |
| O | 2.67777000  | -2.56125300 | -1.29274500 |
| C | 4.10247200  | -2.15876800 | -1.31346100 |
| C | 4.76293800  | -3.29128800 | -0.55255600 |
| H | 5.84263000  | -3.11138500 | -0.48070000 |
| H | 4.35407800  | -3.36429900 | 0.46365600  |
| H | 4.60318800  | -4.24968200 | -1.06259300 |
| C | 4.25857300  | -0.84209800 | -0.57799600 |
| H | 3.75661800  | -0.01968300 | -1.09825900 |
| H | 3.86009100  | -0.92112400 | 0.44268900  |
| H | 5.32634300  | -0.59923300 | -0.50304500 |
| C | 4.59018500  | -2.09571300 | -2.74767800 |
| H | 4.39546100  | -3.04525300 | -3.26282800 |
| H | 4.11434900  | -1.28161300 | -3.30303800 |
| H | 5.67491200  | -1.92813500 | -2.74808300 |
| C | 0.35756400  | -0.57867300 | 0.45919100  |
| H | -0.09860800 | 0.18146800  | -0.18797100 |
| H | 1.44616400  | -0.48076800 | 0.32287900  |

#### IM7a

|                                  |              |
|----------------------------------|--------------|
| M06 SCF energy (au)              | -1522.030362 |
| M06 enthalpy (au)                | -1522.030362 |
| M06 free energy (au)             | -1522.030362 |
| M06 SCF energy in solution (au)  | -1522.453355 |
| M06 enthalpy in solution (au)    | -1521.952256 |
| M06 free energy in solution (au) | -1522.046072 |

#### Cartesian coordinates

| ATOM | X           | Y           | Z           |
|------|-------------|-------------|-------------|
| Pd   | -0.86555200 | -2.97089800 | 2.40171800  |
| C    | -2.40834500 | -4.92221500 | 0.95841800  |
| O    | -2.42521300 | -4.10873900 | 0.02712900  |
| O    | -1.71820700 | -4.82606300 | 2.04532600  |
| C    | -3.26163100 | -6.17465000 | 0.89806900  |
| H    | -2.69721100 | -7.04860700 | 1.24213400  |
| H    | -4.11926400 | -6.05875300 | 1.57363100  |
| H    | -3.63654700 | -6.33885100 | -0.11653900 |
| C    | 0.11376700  | -0.10264200 | 1.90466200  |
| O    | 0.33109200  | 1.08488700  | 2.12003300  |
| N    | -0.33015300 | -1.02542400 | 2.80256600  |
| C    | -0.73117700 | -0.62385000 | 4.08530800  |
| C    | -1.62942900 | -1.50171700 | 4.77281600  |
| C    | -0.34944500 | 0.53511600  | 4.75059400  |
| C    | -2.12921100 | -1.18830500 | 6.06476400  |
| C    | -0.83918200 | 0.83293000  | 6.03690900  |
| H    | 0.32264000  | 1.22456900  | 4.25586200  |
| C    | -2.82861300 | -3.50385800 | 4.72741700  |
| C    | -3.02004000 | -2.11011600 | 6.65959600  |
| C    | -1.71541100 | 0.00538500  | 6.69403200  |
| H    | -0.50581600 | 1.75393100  | 6.51336900  |
| C    | -3.37451300 | -3.26071300 | 6.00073400  |



|   |             |             |             |
|---|-------------|-------------|-------------|
| H | -3.41590000 | -1.88910200 | 7.65131900  |
| H | -2.09285800 | 0.24464100  | 7.68758600  |
| H | -4.05670400 | -3.98279400 | 6.44251400  |
| N | -1.99961600 | -2.65875000 | 4.14906800  |
| H | -3.05275000 | -4.40694600 | 4.15854400  |
| C | -0.06109900 | -1.94660800 | 0.07297000  |
| H | -1.14078100 | -2.04446100 | -0.10242100 |
| C | 0.49570400  | -3.06445000 | 0.86352400  |
| H | 1.46752900  | -2.78004100 | 1.29723300  |
| C | 0.64712700  | -4.28546400 | -0.04093400 |
| H | 1.68664000  | -4.63768900 | -0.02321000 |
| H | 0.01112800  | -5.12707700 | 0.24930600  |
| C | 0.25833900  | -3.83222300 | -1.44910700 |
| H | 0.84446800  | -4.27910000 | -2.25865800 |
| H | -0.81188600 | -4.00324800 | -1.60796200 |
| N | 0.42634300  | -2.33082700 | -1.49305800 |
| H | -0.22893000 | -1.88638800 | -2.14104300 |
| C | 1.73748800  | -1.79238600 | -1.83230100 |
| O | 1.82733100  | -0.79369500 | -2.49545500 |
| O | 2.66250300  | -2.53152600 | -1.27603000 |
| C | 4.09249300  | -2.13958000 | -1.30526500 |
| C | 4.74353300  | -3.26628300 | -0.52843200 |
| H | 5.82389600  | -3.09137400 | -0.45491200 |
| H | 4.32997900  | -3.32398100 | 0.48687600  |
| H | 4.58029500  | -4.23005100 | -1.02707000 |
| C | 4.25610600  | -0.81371700 | -0.58886600 |
| H | 3.75603100  | 0.00391400  | -1.11863400 |
| H | 3.86121500  | -0.87670900 | 0.43427600  |
| H | 5.32513400  | -0.57437900 | -0.52163600 |
| C | 4.57615600  | -2.10034700 | -2.74130000 |
| H | 4.37356900  | -3.05548800 | -3.24280800 |
| H | 4.10531100  | -1.29035500 | -3.30695900 |
| H | 5.66203500  | -1.94074200 | -2.74643100 |
| C | 0.38808700  | -0.56657800 | 0.46087000  |
| H | -0.04995600 | 0.20787300  | -0.18230100 |
| H | 1.47974900  | -0.48119500 | 0.33979500  |

### IM8a

|                                  |              |
|----------------------------------|--------------|
| M06 SCF energy (au)              | -1522.063982 |
| M06 enthalpy (au)                | -1521.563138 |
| M06 free energy (au)             | -1521.658161 |
| M06 SCF energy in solution (au)  | -1522.480169 |
| M06 enthalpy in solution (au)    | -1521.979325 |
| M06 free energy in solution (au) | -1522.074348 |

### Cartesian coordinates

| ATOM | X           | Y           | Z          |
|------|-------------|-------------|------------|
| Pd   | -0.84904500 | -3.12973200 | 2.50482400 |
| C    | -2.78856300 | -5.12986900 | 1.57989500 |
| O    | -3.42291500 | -4.05677400 | 1.14883800 |
| O    | -1.73374800 | -5.07951600 | 2.21172300 |
| C    | -3.43929500 | -6.41235400 | 1.19837100 |
| H    | -3.06600600 | -7.22480800 | 1.82536000 |
| H    | -4.52864800 | -6.33458400 | 1.26232400 |
| H    | -3.18301400 | -6.62814700 | 0.15252800 |
| C    | 1.00205000  | -0.67952000 | 2.26472300 |
| O    | 1.66442500  | 0.20719700  | 2.78766200 |
| N    | -0.12925600 | -1.24031000 | 2.83521500 |
| C    | -0.71512000 | -0.63766100 | 3.95513000 |
| C    | -1.67500800 | -1.39734600 | 4.69777000 |

|   |             |             |             |
|---|-------------|-------------|-------------|
| C | -0.49774900 | 0.67034000  | 4.38771000  |
| C | -2.34698100 | -0.85318700 | 5.82985900  |
| C | -1.17815900 | 1.20516300  | 5.49451200  |
| H | 0.22848300  | 1.28031500  | 3.86657100  |
| C | -2.78937600 | -3.43028600 | 4.95556000  |
| C | -3.25942300 | -1.68715800 | 6.51195700  |
| C | -2.08431800 | 0.47352400  | 6.22277500  |
| H | -0.96312800 | 2.23475200  | 5.77719600  |
| C | -3.48249200 | -2.97358100 | 6.08857700  |
| H | -3.78010400 | -1.28764200 | 7.38261400  |
| H | -2.59771500 | 0.88960200  | 7.08844400  |
| H | -4.17561200 | -3.63347000 | 6.60411600  |
| N | -1.93484900 | -2.67440000 | 4.29334300  |
| H | -2.92834600 | -4.44503400 | 4.57948500  |
| C | 0.49052000  | -2.05018500 | 0.13749200  |
| H | -0.46699300 | -1.51477900 | -0.00169500 |
| C | 0.28192100  | -3.37290800 | 0.84299200  |
| H | 1.25022700  | -3.71534200 | 1.25587400  |
| C | -0.13682400 | -4.31846200 | -0.27161300 |
| H | -0.04986400 | -5.38035400 | -0.01018500 |
| H | -1.17459400 | -4.12226100 | -0.59164600 |
| C | 0.81459900  | -3.91054500 | -1.39951200 |
| H | 1.77894100  | -4.43563600 | -1.31168900 |
| H | 0.41845500  | -4.10898500 | -2.40148800 |
| N | 0.98334300  | -2.47223500 | -1.18682200 |
| C | 1.16859700  | -1.55823600 | -2.17821300 |
| O | 1.04814900  | -0.35549500 | -2.02411100 |
| O | 1.50739300  | -2.17156200 | -3.33278800 |
| C | 1.78247500  | -1.38670800 | -4.52685000 |
| C | 2.12337800  | -2.45052400 | -5.55657500 |
| H | 2.36101200  | -1.98145500 | -6.52004100 |
| H | 2.99109400  | -3.03845000 | -5.23145700 |
| H | 1.27706600  | -3.13422300 | -5.70206100 |
| C | 2.97566600  | -0.47363900 | -4.29620700 |
| H | 2.74783900  | 0.29791500  | -3.55519700 |
| H | 3.83757900  | -1.05818000 | -3.94785500 |
| H | 3.25316300  | 0.01228500  | -5.24145800 |
| C | 0.54356700  | -0.61630300 | -4.95439900 |
| H | -0.30826100 | -1.30080200 | -5.06567200 |
| H | 0.28516900  | 0.15682100  | -4.22527300 |
| H | 0.72580300  | -0.14005900 | -5.92738500 |
| C | 1.44879200  | -1.16526300 | 0.89760700  |
| H | 1.67441900  | -0.26004700 | 0.32218900  |
| H | 2.40750000  | -1.69346800 | 1.02795800  |
| H | -2.87648200 | -3.26572300 | 1.39814600  |

### TS9a

|                                  |              |
|----------------------------------|--------------|
| M06 SCF energy (au)              | -1522.033488 |
| M06 enthalpy (au)                | -1521.537471 |
| M06 free energy (au)             | -1521.631748 |
| M06 SCF energy in solution (au)  | -1522.443869 |
| M06 enthalpy in solution (au)    | -1521.947852 |
| M06 free energy in solution (au) | -1522.042129 |

### Cartesian coordinates

| ATOM | X           | Y           | Z          |
|------|-------------|-------------|------------|
| Pd   | -0.87993200 | -3.13511400 | 2.64177400 |
| C    | -2.17977200 | -5.49145200 | 1.81796700 |
| O    | -2.28421000 | -4.79531000 | 0.76624400 |
| O    | -1.46109900 | -5.14642900 | 2.80285100 |

|   |             |             |             |
|---|-------------|-------------|-------------|
| C | -2.95244100 | -6.77174500 | 1.90353700  |
| H | -2.63262100 | -7.36948100 | 2.76039300  |
| H | -4.01822200 | -6.53468800 | 2.00653400  |
| H | -2.83558400 | -7.33939900 | 0.97502200  |
| C | 0.01193500  | -0.31597900 | 1.70228600  |
| O | 0.07449700  | 0.90517100  | 1.76966000  |
| N | -0.56822000 | -1.10661600 | 2.67568100  |
| C | -1.04097400 | -0.53035700 | 3.86549100  |
| C | -1.49117500 | -1.44234500 | 4.86450500  |
| C | -1.11087500 | 0.82229700  | 4.19899000  |
| C | -1.94992500 | -1.01775900 | 6.14062900  |
| C | -1.57783000 | 1.24234900  | 5.45910000  |
| H | -0.79157600 | 1.55761000  | 3.47460100  |
| C | -1.84602600 | -3.68965000 | 5.42763000  |
| C | -2.34775800 | -2.01482500 | 7.05629900  |
| C | -1.98742100 | 0.36136600  | 6.42859200  |
| H | -1.60572500 | 2.31284600  | 5.65723200  |
| C | -2.29324300 | -3.34333000 | 6.71186000  |
| H | -2.69914100 | -1.70856300 | 8.04172800  |
| H | -2.34066400 | 0.69824100  | 7.40197900  |
| H | -2.59272000 | -4.12561900 | 7.40420800  |
| N | -1.46839400 | -2.77076300 | 4.55581900  |
| H | -1.79756300 | -4.72217900 | 5.08603100  |
| C | -0.01211800 | -2.13514500 | -0.18354500 |
| H | -1.03515600 | -1.83364500 | -0.46378700 |
| C | 0.00567800  | -3.42196900 | 0.63122100  |
| H | 0.91448000  | -3.42146300 | 1.26195400  |
| C | 0.27028700  | -4.54489300 | -0.39670500 |
| H | 0.67469600  | -5.45064300 | 0.07264700  |
| H | -0.64097800 | -4.82026400 | -0.94257400 |
| C | 1.23899000  | -3.86402300 | -1.35222000 |
| H | 2.26946400  | -3.87642600 | -0.95798700 |
| H | 1.25320100  | -4.30975600 | -2.35133000 |
| N | 0.71615300  | -2.50660100 | -1.40814200 |
| C | 0.65338800  | -1.71102300 | -2.51147600 |
| O | 0.05858400  | -0.64864400 | -2.53801800 |
| O | 1.33531000  | -2.25940600 | -3.53785000 |
| C | 1.40303100  | -1.57342400 | -4.82096900 |
| C | 2.24463800  | -2.51790600 | -5.66199700 |
| H | 2.37773400  | -2.10733600 | -6.67113400 |
| H | 3.23465700  | -2.65982000 | -5.21025300 |
| H | 1.75878900  | -3.49845500 | -5.74715900 |
| C | 2.10586300  | -0.23451300 | -4.66669900 |
| H | 1.51454300  | 0.45764800  | -4.06037100 |
| H | 3.08670700  | -0.37436300 | -4.19299400 |
| H | 2.26703100  | 0.21051100  | -5.65791500 |
| C | 0.01315500  | -1.42904200 | -5.41908100 |
| H | -0.48016500 | -2.40894400 | -5.47189700 |
| H | -0.60680500 | -0.75097500 | -4.82566600 |
| H | 0.09375900  | -1.03369800 | -6.44072400 |
| C | 0.68579000  | -0.98381900 | 0.51961300  |
| H | 0.84982900  | -0.17556200 | -0.20030100 |
| H | 1.67919300  | -1.33471400 | 0.85047100  |
| H | -1.29167300 | -3.94722700 | 0.85804200  |

### IM9a

|                                 |              |
|---------------------------------|--------------|
| M06 SCF energy (au)             | -1522.091558 |
| M06 enthalpy (au)               | -1521.589601 |
| M06 free energy (au)            | -1521.679900 |
| M06 SCF energy in solution (au) | -1522.491326 |

M06 enthalpy in solution (au) -1521.989369  
M06 free energy in solution (au) -1522.079668

Cartesian coordinates

| ATOM | X           | Y           | Z           |
|------|-------------|-------------|-------------|
| Pd   | -1.05267400 | -1.68284700 | 2.06382700  |
| C    | -1.91372600 | -3.37417900 | 0.51806500  |
| O    | -0.66634300 | -3.15231700 | 0.60322700  |
| O    | -2.68407600 | -2.79048200 | 1.35076700  |
| C    | -2.45422800 | -4.24934200 | -0.55562900 |
| H    | -3.50022900 | -4.50509500 | -0.36390500 |
| H    | -2.37924800 | -3.69970400 | -1.50310400 |
| H    | -1.84609700 | -5.15520200 | -0.64878500 |
| C    | 1.79844600  | -0.65980600 | 1.81026200  |
| O    | 2.87346800  | -0.23519000 | 2.22602300  |
| N    | 0.66311200  | -0.73884000 | 2.58980600  |
| C    | 0.55165400  | -0.04407000 | 3.79147800  |
| C    | -0.78190800 | 0.08899800  | 4.27159500  |
| C    | 1.55215000  | 0.56799000  | 4.54171300  |
| C    | -1.10803600 | 0.83130200  | 5.43373700  |
| C    | 1.22935500  | 1.29560400  | 5.70470700  |
| H    | 2.58064800  | 0.48108300  | 4.21469900  |
| C    | -3.03039300 | -0.44617600 | 3.89270600  |
| C    | -2.47294300 | 0.90815500  | 5.78794900  |
| C    | -0.06088300 | 1.44163500  | 6.15681800  |
| H    | 2.04558800  | 1.75592400  | 6.25959200  |
| C    | -3.43018500 | 0.28242600  | 5.02502900  |
| H    | -2.75390500 | 1.47201500  | 6.67745600  |
| H    | -0.29005400 | 2.00918900  | 7.05731100  |
| H    | -4.48459700 | 0.33082000  | 5.28330400  |
| N    | -1.75858600 | -0.52841400 | 3.54440600  |
| H    | -3.73922600 | -0.98310500 | 3.26298000  |
| C    | 1.18078600  | 0.18836900  | -0.50027600 |
| H    | 1.11100600  | -0.17308700 | -1.53507900 |
| C    | 2.08311700  | 1.42119900  | -0.39249600 |
| H    | 3.12258900  | 1.15294200  | -0.17247700 |
| C    | 1.45126800  | 2.26866800  | 0.71248700  |
| H    | 1.80980300  | 1.93443800  | 1.69380300  |
| H    | 1.69727500  | 3.33293900  | 0.62108400  |
| C    | -0.04811400 | 2.01943000  | 0.56573100  |
| H    | -0.57048100 | 1.98093500  | 1.53254100  |
| H    | -0.53996300 | 2.79301100  | -0.04228600 |
| N    | -0.12789600 | 0.72785200  | -0.11764200 |
| C    | -1.28270400 | 0.20211900  | -0.60434500 |
| O    | -1.35185200 | -0.80399400 | -1.29278000 |
| O    | -2.33257300 | 0.95949900  | -0.21265100 |
| C    | -3.65089800 | 0.77343400  | -0.79657200 |
| C    | -4.46445500 | 1.87496200  | -0.13789000 |
| H    | -5.49691300 | 1.85848200  | -0.51007300 |
| H    | -4.48424200 | 1.73865800  | 0.95165000  |
| H    | -4.03054700 | 2.85943100  | -0.35409000 |
| C    | -4.22426100 | -0.58561500 | -0.43754500 |
| H    | -3.68335500 | -1.39457600 | -0.93575900 |
| H    | -4.16333900 | -0.75377300 | 0.64539500  |
| H    | -5.28094400 | -0.62597300 | -0.73661800 |
| C    | -3.58744100 | 0.98752300  | -2.30031100 |
| H    | -3.15471500 | 1.97106700  | -2.52768200 |
| H    | -2.98439800 | 0.21317500  | -2.78488500 |
| H    | -4.60177300 | 0.95640900  | -2.72026700 |
| C    | 1.63676100  | -1.01199300 | 0.35094800  |

|   |            |             |             |
|---|------------|-------------|-------------|
| H | 2.62668100 | -1.31728000 | -0.01378800 |
| H | 0.94142400 | -1.83925300 | 0.18315000  |
| H | 2.06254900 | 1.96741700  | -1.34627000 |

**1e**

|                                  |             |
|----------------------------------|-------------|
| M06 SCF energy (au)              | -996.519590 |
| M06 enthalpy (au)                | -996.118335 |
| M06 free energy (au)             | -996.187432 |
| M06 SCF energy in solution (au)  | -996.817273 |
| M06 enthalpy in solution (au)    | -996.416018 |
| M06 free energy in solution (au) | -996.485115 |

Cartesian coordinates

| ATOM | X           | Y           | Z           |
|------|-------------|-------------|-------------|
| C    | 0.14560200  | 3.04512700  | -0.96857900 |
| O    | -0.12442400 | 3.57912400  | 0.10523600  |
| N    | -0.43897900 | 3.41752400  | -2.13966900 |
| C    | -1.40914000 | 4.39741900  | -2.35504500 |
| C    | -1.90204100 | 4.46446600  | -3.69715000 |
| C    | -1.90043900 | 5.26725600  | -1.40350200 |
| C    | -2.88646100 | 5.43221500  | -4.03097100 |
| C    | -2.87919400 | 6.21981700  | -1.75697600 |
| H    | -1.52933800 | 5.20699300  | -0.38677600 |
| C    | -1.84730900 | 3.63839300  | -5.83474500 |
| C    | -3.33566700 | 5.45192100  | -5.37051400 |
| C    | -3.36825900 | 6.31249700  | -3.03508700 |
| H    | -3.24737700 | 6.89360100  | -0.98524400 |
| C    | -2.82111100 | 4.55936800  | -6.27568700 |
| H    | -4.09046000 | 6.18195300  | -5.66435200 |
| H    | -4.12430200 | 7.05138900  | -3.29925700 |
| H    | -3.14759900 | 4.55047400  | -7.31307300 |
| N    | -1.40029000 | 3.58469800  | -4.60068100 |
| H    | -1.42458300 | 2.91793300  | -6.53821600 |
| C    | 1.14623200  | 1.05921700  | -2.27639300 |
| H    | 2.10004000  | 0.81540900  | -2.74914600 |
| C    | 0.04187500  | 0.48564600  | -2.75518000 |
| H    | 0.08107400  | -0.20024600 | -3.59878600 |
| C    | 1.24133100  | 1.97907900  | -1.08764600 |
| H    | 2.16921800  | 2.57037000  | -1.18990800 |
| H    | -0.94604200 | 0.67790600  | -2.33372700 |
| C    | 1.44943300  | 1.21476300  | 0.26178600  |
| C    | 0.18760100  | 0.45993700  | 0.69986100  |
| C    | 2.61238000  | 0.23114100  | 0.12683500  |
| C    | 0.42364500  | -0.30884200 | 1.99596700  |
| H    | -0.10301900 | -0.24462000 | -0.09667600 |
| H    | -0.64274100 | 1.17049500  | 0.82393400  |
| C    | 2.85842100  | -0.52723200 | 1.42581500  |
| H    | 2.38451500  | -0.49031800 | -0.67405900 |
| H    | 3.51167600  | 0.79044900  | -0.17602100 |
| C    | 1.59978000  | -1.26887300 | 1.86171000  |
| H    | -0.48936900 | -0.85215100 | 2.27847400  |
| H    | 0.63151900  | 0.41057300  | 2.80203800  |
| H    | 3.69488400  | -1.22838200 | 1.29409200  |
| H    | 3.15598600  | 0.18699800  | 2.20694500  |
| H    | 1.77331500  | -1.80083500 | 2.80811200  |
| H    | 1.35429600  | -2.03919700 | 1.10903800  |
| O    | 1.85018200  | 2.14419400  | 1.24602700  |
| H    | 1.15014000  | 2.82369900  | 1.26359100  |
| H    | -0.20349500 | 2.90055000  | -2.98619600 |

**3d**

|                                  |             |
|----------------------------------|-------------|
| M06 SCF energy (au)              | -996.545614 |
| M06 enthalpy (au)                | -996.142768 |
| M06 free energy (au)             | -996.210819 |
| M06 SCF energy in solution (au)  | -996.835662 |
| M06 enthalpy in solution (au)    | -996.432816 |
| M06 free energy in solution (au) | -996.500867 |

## Cartesian coordinates

| ATOM | X           | Y           | Z           |
|------|-------------|-------------|-------------|
| C    | -0.42977000 | 1.91159800  | -0.54324300 |
| O    | -1.09750600 | 2.19506000  | 0.43659200  |
| N    | -0.58317800 | 2.50745800  | -1.77202800 |
| C    | -1.27834000 | 3.67917100  | -2.06597500 |
| C    | -0.87884900 | 4.33353400  | -3.27390300 |
| C    | -2.28210700 | 4.22356200  | -1.29241900 |
| C    | -1.53408100 | 5.53084100  | -3.66690200 |
| C    | -2.91451800 | 5.41757000  | -1.69792200 |
| H    | -2.56746900 | 3.72807600  | -0.37067800 |
| C    | 0.50498800  | 4.37354500  | -5.10206700 |
| C    | -1.09783500 | 6.13346800  | -4.86780400 |
| C    | -2.56297600 | 6.06325300  | -2.85636700 |
| H    | -3.70343300 | 5.82535800  | -1.06818800 |
| C    | -0.08136000 | 5.56086300  | -5.58882100 |
| H    | -1.57874400 | 7.05291100  | -5.20302400 |
| H    | -3.05963800 | 6.98305900  | -3.16392100 |
| H    | 0.27648800  | 6.00326700  | -6.51566300 |
| N    | 0.12963300  | 3.77653000  | -3.99309200 |
| H    | 1.31932800  | 3.90373500  | -5.65762300 |
| C    | 0.54077700  | -0.09938100 | 0.63552700  |
| H    | 0.88435500  | -1.09532700 | 0.32729100  |
| C    | 1.49763300  | 0.47940400  | 1.65977700  |
| H    | 1.86311600  | -0.24260300 | 2.39908200  |
| C    | 0.68590500  | 0.88465800  | -0.52598000 |
| H    | 0.68823000  | 0.35970900  | -1.49306700 |
| H    | 1.02604800  | 1.32297400  | 2.19446000  |
| C    | 2.10597800  | 1.52668300  | -0.29920200 |
| C    | 3.05703900  | 1.15396400  | -1.43229100 |
| C    | 2.10013300  | 3.04731200  | -0.10066100 |
| C    | 4.46469400  | 1.68852100  | -1.20174600 |
| H    | 2.65184800  | 1.57126600  | -2.37225700 |
| H    | 3.06218700  | 0.05766900  | -1.53658900 |
| C    | 3.50838700  | 3.57551700  | 0.14911800  |
| H    | 1.69101600  | 3.53088000  | -1.00434900 |
| H    | 1.42916700  | 3.31078200  | 0.73049700  |
| C    | 4.44451900  | 3.19870300  | -0.99357900 |
| H    | 5.11153500  | 1.42046000  | -2.04911300 |
| H    | 4.88592000  | 1.19962700  | -0.31038800 |
| H    | 3.47688400  | 4.66627800  | 0.27970600  |
| H    | 3.88763100  | 3.15030400  | 1.09029300  |
| H    | 5.45961500  | 3.57406800  | -0.80107200 |
| H    | 4.09850100  | 3.68839600  | -1.92108600 |
| O    | 2.60062300  | 0.90909400  | 0.89174100  |
| H    | -0.49124500 | -0.16877800 | 0.99479600  |
| H    | 0.08225100  | 2.26760800  | -2.50531800 |

**IM1e**

|                      |              |
|----------------------|--------------|
| M06 SCF energy (au)  | -1352.250507 |
| M06 enthalpy (au)    | -1351.801547 |
| M06 free energy (au) | -1351.885483 |

|                                  |              |
|----------------------------------|--------------|
| M06 SCF energy in solution (au)  | -1352.612957 |
| M06 enthalpy in solution (au)    | -1352.163997 |
| M06 free energy in solution (au) | -1352.247933 |

Cartesian coordinates

| ATOM | X           | Y           | Z           |
|------|-------------|-------------|-------------|
| Pd   | 0.11838300  | 2.30984900  | -3.76468200 |
| C    | -0.05551000 | 0.10683400  | -5.57209600 |
| O    | -0.27373300 | -0.56167300 | -4.57040600 |
| O    | 0.27466000  | 1.37217700  | -5.57426000 |
| C    | -0.15202100 | -0.47075300 | -6.96705900 |
| H    | -0.30921300 | -1.55148500 | -6.91726300 |
| H    | -0.99365000 | -0.00905400 | -7.49954600 |
| H    | 0.75404200  | -0.24691700 | -7.54131700 |
| C    | 0.16264400  | 3.10550800  | -0.89442600 |
| O    | -0.28367200 | 3.52791100  | 0.16916500  |
| N    | -0.31700700 | 3.42991300  | -2.13110400 |
| C    | -1.34067300 | 4.35976300  | -2.33681700 |
| C    | -1.85185400 | 4.40769800  | -3.66321200 |
| C    | -1.87646100 | 5.24742100  | -1.41303800 |
| C    | -2.86155300 | 5.32523100  | -4.04597400 |
| C    | -2.88076000 | 6.15892900  | -1.79496600 |
| H    | -1.51867400 | 5.22746700  | -0.39082700 |
| C    | -1.75477400 | 3.50569100  | -5.82089000 |
| C    | -3.29506500 | 5.28793300  | -5.38960500 |
| C    | -3.37419600 | 6.21354500  | -3.07581200 |
| H    | -3.27135000 | 6.83746800  | -1.03842000 |
| C    | -2.74887900 | 4.38981600  | -6.27372200 |
| H    | -4.07037700 | 5.98377100  | -5.71040500 |
| H    | -4.15213600 | 6.92161900  | -3.35720900 |
| H    | -3.06955400 | 4.34674200  | -7.31111500 |
| N    | -1.33458800 | 3.52403600  | -4.57012400 |
| H    | -1.27750500 | 2.76622600  | -6.46452400 |
| C    | 1.15186200  | 1.18947400  | -2.10503600 |
| H    | 0.43364600  | 0.38234900  | -1.93273400 |
| C    | 1.93990200  | 1.15562900  | -3.22942000 |
| H    | 1.89880800  | 0.30872400  | -3.90793500 |
| C    | 1.36370500  | 2.16003000  | -0.98037300 |
| H    | 2.22386000  | 2.80032000  | -1.24425700 |
| H    | 2.77389900  | 1.85170800  | -3.34175600 |
| C    | 1.64610000  | 1.43902800  | 0.36842800  |
| C    | 2.58962300  | 0.24891300  | 0.19742300  |
| C    | 2.25627000  | 2.40098200  | 1.39944400  |
| C    | 4.01662000  | 0.65301300  | -0.15199800 |
| H    | 2.18061400  | -0.45738300 | -0.53918700 |
| H    | 2.58363000  | -0.28425100 | 1.16151200  |
| C    | 3.69275400  | 2.81063000  | 1.08887000  |
| H    | 1.61029800  | 3.28116300  | 1.51048700  |
| H    | 2.23348000  | 1.86146100  | 2.36058700  |
| C    | 4.59016900  | 1.59367100  | 0.90149800  |
| H    | 4.04275500  | 1.14709800  | -1.13879800 |
| H    | 4.64145900  | -0.24573900 | -0.24861700 |
| H    | 3.72565700  | 3.43253200  | 0.17785700  |
| H    | 4.07372400  | 3.45014000  | 1.89758600  |
| H    | 4.66510000  | 1.05188600  | 1.85961900  |
| H    | 5.61104200  | 1.90082500  | 0.63354400  |
| O    | 0.43283700  | 0.89638600  | 0.85121100  |
| H    | -0.13595700 | 1.65914000  | 1.05536000  |

TS10e

|                                  |              |
|----------------------------------|--------------|
| M06 SCF energy (au)              | -1931.145290 |
| M06 enthalpy (au)                | -1930.426202 |
| M06 free energy (au)             | -1930.531850 |
| M06 SCF energy in solution (au)  | -1931.669118 |
| M06 enthalpy in solution (au)    | -1930.950030 |
| M06 free energy in solution (au) | -1931.055678 |

Cartesian coordinates

| ATOM | X           | Y           | Z           |
|------|-------------|-------------|-------------|
| Pd   | -0.64023500 | 1.87463500  | -3.85594800 |
| C    | -1.36484800 | -0.54678100 | -5.46734500 |
| O    | -1.30473900 | -1.27884600 | -4.45893000 |
| O    | -1.27797200 | 0.72556100  | -5.46775800 |
| C    | -1.57198800 | -1.19350700 | -6.81864000 |
| H    | -2.53745600 | -1.71342600 | -6.82697000 |
| H    | -1.54041500 | -0.46643000 | -7.63433700 |
| H    | -0.79831200 | -1.95622200 | -6.97428200 |
| C    | 0.93679300  | 2.64056000  | -1.51259500 |
| O    | 1.51247500  | 3.32710700  | -0.67694800 |
| N    | 0.03805300  | 3.10063300  | -2.43849900 |
| C    | -0.30118700 | 4.44015000  | -2.62006500 |
| C    | -1.05805200 | 4.73123400  | -3.79963300 |
| C    | 0.01741600  | 5.49990900  | -1.78067400 |
| C    | -1.47007100 | 6.05505800  | -4.10048800 |
| C    | -0.39867300 | 6.80968900  | -2.08741100 |
| H    | 0.59897700  | 5.30089700  | -0.88797200 |
| C    | -2.05310000 | 3.90747600  | -5.74549900 |
| C    | -2.20663200 | 6.25072200  | -5.29092300 |
| C    | -1.12721600 | 7.10052400  | -3.21518800 |
| H    | -0.12770800 | 7.60980000  | -1.40007000 |
| C    | -2.49837000 | 5.19064900  | -6.11264200 |
| H    | -2.53495900 | 7.25931000  | -5.54340500 |
| H    | -1.44326500 | 8.11772500  | -3.44288200 |
| H    | -3.06130800 | 5.32277400  | -7.03312200 |
| N    | -1.36900500 | 3.69528500  | -4.63965600 |
| H    | -2.25057900 | 3.02657100  | -6.35654500 |
| C    | 0.29978800  | 0.47570600  | -2.67125400 |
| H    | 0.71696200  | -0.33673700 | -3.27360700 |
| C    | -0.85515200 | 0.09466100  | -1.93221700 |
| H    | -1.47321200 | -0.73145700 | -2.28014400 |
| C    | 1.25378100  | 1.14947800  | -1.70408000 |
| H    | 2.27272000  | 1.15627600  | -2.12208000 |
| H    | -1.33754000 | 0.82683800  | -1.28336500 |
| C    | 1.27701200  | 0.23291600  | -0.41887600 |
| C    | 2.52921800  | -0.64154000 | -0.43734000 |
| C    | 1.13640700  | 0.95613000  | 0.91281700  |
| C    | 2.61788000  | -1.58955900 | 0.75282400  |
| H    | 3.39518800  | 0.04038200  | -0.42580900 |
| H    | 2.57247800  | -1.19298000 | -1.39244200 |
| C    | 1.22354100  | 0.00295700  | 2.10017700  |
| H    | 1.92326500  | 1.72033000  | 0.96516300  |
| H    | 0.18446200  | 1.50798800  | 0.92406800  |
| C    | 2.50713200  | -0.81811400 | 2.06250400  |
| H    | 3.56294000  | -2.15001200 | 0.70683400  |
| H    | 1.81221700  | -2.34022600 | 0.69367200  |
| H    | 1.16489000  | 0.57929100  | 3.03383100  |
| H    | 0.35604300  | -0.67455400 | 2.09195600  |
| H    | 2.55229700  | -1.50526700 | 2.91888100  |
| H    | 3.37399200  | -0.14130400 | 2.15530300  |
| O    | 0.10213900  | -0.65163400 | -0.49667700 |



|   |             |             |             |
|---|-------------|-------------|-------------|
| H | 0.35293500  | -1.49146100 | -0.95398900 |
| C | 0.81334400  | -3.47540700 | -3.08797800 |
| O | 0.25600900  | -3.37571300 | -4.27474300 |
| O | 0.50478900  | -2.77178100 | -2.13438100 |
| H | -0.41677000 | -2.62183500 | -4.30340200 |
| C | 1.88719400  | -4.53970700 | -3.02549800 |
| C | 2.44584600  | -4.66267500 | -1.60443900 |
| C | 1.31673800  | -5.90067100 | -3.46879600 |
| C | 3.03444100  | -4.15057300 | -3.98110500 |
| H | 1.63118500  | -4.90896600 | -0.90498300 |
| H | 2.85053600  | -3.68917000 | -1.28369100 |
| C | 3.53998600  | -5.73069400 | -1.55927600 |
| H | 0.90492400  | -5.81450800 | -4.48457600 |
| H | 0.48399900  | -6.18463000 | -2.80423500 |
| C | 2.41613300  | -6.96404100 | -3.42227500 |
| H | 3.44086800  | -3.16812300 | -3.68429100 |
| H | 2.64266200  | -4.04459300 | -5.00332400 |
| C | 4.13303300  | -5.21498100 | -3.93383000 |
| H | 3.92610000  | -5.80876000 | -0.53153100 |
| C | 2.95897500  | -7.07828400 | -1.99554400 |
| C | 4.67504300  | -5.33321700 | -2.50713800 |
| H | 1.99441900  | -7.93040400 | -3.73816100 |
| C | 3.55060400  | -6.56268500 | -4.36953000 |
| H | 4.94486300  | -4.92331100 | -4.61750300 |
| H | 2.15388700  | -7.38353400 | -1.30773900 |
| H | 3.73586800  | -7.85818100 | -1.94795600 |
| H | 5.11579700  | -4.37464600 | -2.18849200 |
| H | 5.47958900  | -6.08512800 | -2.47092500 |
| H | 4.33844800  | -7.33287200 | -4.36204500 |
| H | 3.17448600  | -6.49609200 | -5.40301500 |

### IM10e

|                                  |              |
|----------------------------------|--------------|
| M06 SCF energy (au)              | -1931.152432 |
| M06 enthalpy (au)                | -1930.432125 |
| M06 free energy (au)             | -1930.538674 |
| M06 SCF energy in solution (au)  | -1931.678176 |
| M06 enthalpy in solution (au)    | -1930.957869 |
| M06 free energy in solution (au) | -1931.064418 |

### Cartesian coordinates

| ATOM | X           | Y           | Z           |
|------|-------------|-------------|-------------|
| Pd   | -0.61213000 | 1.90528600  | -3.86112500 |
| C    | -1.32897900 | -0.60801100 | -5.36152000 |
| O    | -1.30671600 | -1.29802400 | -4.31566100 |
| O    | -1.23789500 | 0.65667100  | -5.41894600 |
| C    | -1.49506500 | -1.32687300 | -6.68259100 |
| H    | -2.46912800 | -1.83061500 | -6.70177700 |
| H    | -1.41886300 | -0.64597700 | -7.53446300 |
| H    | -0.73036200 | -2.11012800 | -6.76579500 |
| C    | 0.92897300  | 2.70370000  | -1.51182600 |
| O    | 1.47959000  | 3.37335500  | -0.64211000 |
| N    | 0.06105900  | 3.16065200  | -2.46053900 |
| C    | -0.28802300 | 4.49517200  | -2.64652500 |
| C    | -1.05774400 | 4.77672800  | -3.82339200 |
| C    | 0.03246800  | 5.55963500  | -1.81352700 |
| C    | -1.47861100 | 6.09943300  | -4.11992100 |
| C    | -0.39149800 | 6.86670000  | -2.11936900 |
| H    | 0.62060500  | 5.36395900  | -0.92407900 |
| C    | -2.07151800 | 3.95108000  | -5.75387500 |
| C    | -2.23057500 | 6.29319200  | -5.30123800 |

|   |             |             |             |
|---|-------------|-------------|-------------|
| C | -1.13229200 | 7.14942700  | -3.24103700 |
| H | -0.11809700 | 7.67058700  | -1.43717700 |
| C | -2.52836700 | 5.23166200  | -6.11787600 |
| H | -2.56565000 | 7.30082400  | -5.54910400 |
| H | -1.45636500 | 8.16417300  | -3.46921200 |
| H | -3.10380800 | 5.36024900  | -7.03130300 |
| N | -1.37172900 | 3.73785900  | -4.65862400 |
| H | -2.27543400 | 3.07150800  | -6.36501100 |
| C | 0.25511400  | 0.53132200  | -2.65979600 |
| H | 0.71274300  | -0.28262400 | -3.23738800 |
| C | -0.75730100 | -0.01427700 | -1.72329200 |
| H | -1.38017000 | -0.81868600 | -2.11656900 |
| C | 1.24947400  | 1.21486000  | -1.71634100 |
| H | 2.25478000  | 1.21554200  | -2.16626500 |
| H | -1.34520500 | 0.73967000  | -1.18742800 |
| C | 1.30692000  | 0.32117200  | -0.44715100 |
| C | 2.54640300  | -0.55893000 | -0.43273900 |
| C | 1.05607600  | 0.97598000  | 0.89675700  |
| C | 2.59171000  | -1.54148100 | 0.73210300  |
| H | 3.40050900  | 0.13398000  | -0.36139400 |
| H | 2.64125800  | -1.07426900 | -1.40264800 |
| C | 1.10294100  | -0.01581200 | 2.05464000  |
| H | 1.81916200  | 1.75788100  | 1.01160100  |
| H | 0.09622900  | 1.51188700  | 0.87053300  |
| C | 2.40156900  | -0.81345500 | 2.05735200  |
| H | 3.54918100  | -2.08102200 | 0.71474200  |
| H | 1.80931200  | -2.30927800 | 0.60837900  |
| H | 0.98474500  | 0.52936700  | 3.00074700  |
| H | 0.24926300  | -0.70791300 | 1.98450900  |
| H | 2.41493400  | -1.52656100 | 2.89285400  |
| H | 3.25009900  | -0.12616600 | 2.21558500  |
| O | 0.10568100  | -0.62898400 | -0.63125300 |
| H | 0.40682800  | -1.49290500 | -1.04974800 |
| C | 0.86116400  | -3.47666400 | -2.98902000 |
| O | 0.24936200  | -3.34656900 | -4.13583700 |
| O | 0.63040500  | -2.78316500 | -2.00019300 |
| H | -0.42160000 | -2.57451900 | -4.15107000 |
| C | 1.91249900  | -4.56475500 | -2.98631300 |
| C | 2.50162800  | -4.75015100 | -1.58408100 |
| C | 1.31018400  | -5.89832900 | -3.46773200 |
| C | 3.04459200  | -4.15634500 | -3.95329400 |
| H | 1.69916400  | -5.01185300 | -0.87596000 |
| H | 2.92845800  | -3.79596100 | -1.23503600 |
| C | 3.57895200  | -5.83599600 | -1.60518500 |
| H | 0.87724900  | -5.76700400 | -4.46961400 |
| H | 0.48789900  | -6.19488700 | -2.79575700 |
| C | 2.39297800  | -6.97935900 | -3.48687500 |
| H | 3.47339700  | -3.19242100 | -3.62872900 |
| H | 2.63102800  | -4.00541100 | -4.96129200 |
| C | 4.12611400  | -5.23888300 | -3.97170000 |
| H | 3.98697600  | -5.95935300 | -0.59046200 |
| C | 2.96614700  | -7.15673800 | -2.07870400 |
| C | 4.69837000  | -5.41969500 | -2.56354600 |
| H | 1.94832300  | -7.92607500 | -3.82933000 |
| C | 3.51204500  | -6.55968500 | -4.44449100 |
| H | 4.92662000  | -4.93344400 | -4.66254400 |
| H | 2.17216900  | -7.47585500 | -1.38430400 |
| H | 3.73114300  | -7.94960800 | -2.07892800 |
| H | 5.16173300  | -4.48085400 | -2.21926600 |
| H | 5.49132200  | -6.18446600 | -2.57464000 |

|   |            |             |             |
|---|------------|-------------|-------------|
| H | 4.28723800 | -7.34151900 | -4.48444200 |
| H | 3.11393900 | -6.44797600 | -5.46569600 |

### TS11e

|                                  |              |
|----------------------------------|--------------|
| M06 SCF energy (au)              | -1931.147371 |
| M06 enthalpy (au)                | -1930.432806 |
| M06 free energy (au)             | -1930.536813 |
| M06 SCF energy in solution (au)  | -1931.671658 |
| M06 enthalpy in solution (au)    | -1930.957093 |
| M06 free energy in solution (au) | -1931.061100 |

### Cartesian coordinates

| ATOM | X           | Y           | Z           |
|------|-------------|-------------|-------------|
| Pd   | -0.52275500 | 1.96851200  | -3.87991100 |
| C    | -0.77606700 | -0.58976800 | -5.44266500 |
| O    | -1.10013400 | -1.19997500 | -4.35552600 |
| O    | -0.80504100 | 0.65017200  | -5.54450000 |
| C    | -0.37869800 | -1.43074600 | -6.62023600 |
| H    | -1.24146500 | -2.01843400 | -6.95684600 |
| H    | -0.01288700 | -0.80974300 | -7.44087000 |
| H    | 0.39191900  | -2.14873500 | -6.31190500 |
| C    | 0.80821600  | 2.78761300  | -1.41679400 |
| O    | 1.25712200  | 3.47552000  | -0.50671300 |
| N    | -0.04887300 | 3.21064500  | -2.39803400 |
| C    | -0.48124200 | 4.52332600  | -2.56879200 |
| C    | -1.17452300 | 4.79788400  | -3.79353400 |
| C    | -0.30735300 | 5.57219900  | -1.67485500 |
| C    | -1.66648700 | 6.09948700  | -4.07572300 |
| C    | -0.80149300 | 6.85745200  | -1.96690200 |
| H    | 0.22303700  | 5.38279000  | -0.74871400 |
| C    | -1.96790200 | 3.98783700  | -5.83000700 |
| C    | -2.33378300 | 6.29050100  | -5.30685600 |
| C    | -1.46984400 | 7.13374900  | -3.13455400 |
| H    | -0.64321500 | 7.64895700  | -1.23573100 |
| C    | -2.48667200 | 5.24682000  | -6.18438200 |
| H    | -2.72071800 | 7.28186700  | -5.54421200 |
| H    | -1.84901100 | 8.13149400  | -3.35213600 |
| H    | -2.99446000 | 5.37335200  | -7.13724700 |
| N    | -1.34419700 | 3.77543600  | -4.68893100 |
| H    | -2.05903600 | 3.12554700  | -6.49094500 |
| C    | 0.33450200  | 0.62381600  | -2.64427100 |
| H    | 0.87310500  | -0.15592600 | -3.20225800 |
| C    | -0.66731900 | -0.00718900 | -1.73419400 |
| H    | -1.26524600 | -0.81664800 | -2.15404700 |
| C    | 1.24800700  | 1.33501800  | -1.64385700 |
| H    | 2.26839900  | 1.41827700  | -2.04931000 |
| H    | -1.30420400 | 0.71140000  | -1.20396800 |
| C    | 1.30269300  | 0.39654900  | -0.40436500 |
| C    | 2.61129700  | -0.37610400 | -0.34192300 |
| C    | 0.93456500  | 0.98968100  | 0.94315000  |
| C    | 2.66939400  | -1.39324000 | 0.79159500  |
| H    | 3.39625300  | 0.38426900  | -0.19559200 |
| H    | 2.80562500  | -0.85193900 | -1.31527600 |
| C    | 0.98971400  | -0.03747300 | 2.06946500  |
| H    | 1.63319600  | 1.81720200  | 1.12861400  |
| H    | -0.05955300 | 1.45628600  | 0.88252600  |
| C    | 2.34434700  | -0.73358400 | 2.12621600  |
| H    | 3.66724500  | -1.85303300 | 0.81435400  |
| H    | 1.96192300  | -2.21299900 | 0.58844600  |
| H    | 0.77221400  | 0.46175600  | 3.02353400  |

|   |             |             |             |
|---|-------------|-------------|-------------|
| H | 0.19889300  | -0.78937900 | 1.92186800  |
| H | 2.36242300  | -1.47522800 | 2.93664200  |
| H | 3.12472400  | 0.01019200  | 2.36232400  |
| O | 0.19784300  | -0.61858400 | -0.69150100 |
| H | 0.56099800  | -1.49240900 | -1.18870900 |
| C | 0.99052900  | -3.33742300 | -2.89584200 |
| O | 0.25579200  | -3.15742000 | -3.91103400 |
| O | 1.01138200  | -2.64375000 | -1.84717500 |
| H | -0.54604800 | -2.13098200 | -4.13839900 |
| C | 1.93483100  | -4.53147000 | -2.97455800 |
| C | 2.82177100  | -4.64943000 | -1.73066900 |
| C | 1.10187900  | -5.81963900 | -3.11978800 |
| C | 2.83279400  | -4.38869300 | -4.21798500 |
| H | 2.18938200  | -4.73802100 | -0.83363000 |
| H | 3.40984800  | -3.72508300 | -1.60633000 |
| C | 3.74790700  | -5.86173200 | -1.85443100 |
| H | 0.45292100  | -5.73388300 | -4.00368000 |
| H | 0.44305600  | -5.93090200 | -2.24214900 |
| C | 2.02656400  | -7.03238700 | -3.24176100 |
| H | 3.42728800  | -3.46226600 | -4.13796400 |
| H | 2.20093300  | -4.29291500 | -5.11351000 |
| C | 3.75984600  | -5.59960300 | -4.34127400 |
| H | 4.37681600  | -5.93134100 | -0.95344600 |
| C | 2.90624400  | -7.13351200 | -1.99290600 |
| C | 4.63679100  | -5.70288000 | -3.09082600 |
| H | 1.41689600  | -7.94377000 | -3.34149300 |
| C | 2.91601600  | -6.87029000 | -4.47769100 |
| H | 4.39561000  | -5.47974400 | -5.23222500 |
| H | 2.27777600  | -7.26965000 | -1.09785600 |
| H | 3.56242800  | -8.01620800 | -2.06308300 |
| H | 5.26300200  | -4.80114100 | -2.99273700 |
| H | 5.32111100  | -6.56223100 | -3.17897900 |
| H | 3.57227900  | -7.74870800 | -4.58836700 |
| H | 2.29447900  | -6.81541500 | -5.38603300 |

### IM3e

|                                  |              |
|----------------------------------|--------------|
| M06 SCF energy (au)              | -1702.192724 |
| M06 enthalpy (au)                | -1701.541316 |
| M06 free energy (au)             | -1701.635176 |
| M06 SCF energy in solution (au)  | -1702.644031 |
| M06 enthalpy in solution (au)    | -1701.992623 |
| M06 free energy in solution (au) | -1702.086483 |

### Cartesian coordinates

| ATOM | X           | Y          | Z           |
|------|-------------|------------|-------------|
| Pd   | 0.61101400  | 2.82200100 | -4.02549000 |
| C    | -0.11639800 | 0.86780600 | -6.12066100 |
| O    | -1.14195300 | 0.66631000 | -5.30822900 |
| O    | 0.74884000  | 1.71277900 | -5.88625000 |
| C    | 1.29037600  | 3.23181900 | -1.22753700 |
| O    | 1.31115700  | 3.66010000 | -0.07994100 |
| N    | 0.49516500  | 3.70560500 | -2.24630200 |
| C    | -0.43527300 | 4.72678000 | -2.12940000 |
| C    | -1.21112900 | 5.00935400 | -3.30286400 |
| C    | -0.68330900 | 5.49139100 | -0.99368600 |
| C    | -2.19053900 | 6.04007300 | -3.29753400 |
| C    | -1.65880300 | 6.50436000 | -1.00354400 |
| H    | -0.10665700 | 5.28710900 | -0.09880100 |
| C    | -1.67089500 | 4.50545200 | -5.52913000 |
| C    | -2.90695400 | 6.26494200 | -4.49387300 |

|   |             |             |              |
|---|-------------|-------------|--------------|
| C | -2.40579000 | 6.78925000  | -2.12110900  |
| H | -1.81580200 | 7.07635400  | -0.09007700  |
| C | -2.65327200 | 5.50782900  | -5.61001000  |
| H | -3.66167900 | 7.05162500  | -4.51184700  |
| H | -3.15631500 | 7.57861400  | -2.12107000  |
| H | -3.19032700 | 5.66666400  | -6.54177500  |
| N | -0.98399900 | 4.26423200  | -4.42938400  |
| H | -1.43427300 | 3.88232300  | -6.39372200  |
| C | 2.12447200  | 1.76967600  | -3.16903400  |
| H | 3.01388400  | 2.16549400  | -3.68023200  |
| C | 2.04168400  | 0.24381300  | -3.25500700  |
| H | 2.81392900  | -0.18759300 | -3.90760900  |
| C | 2.14612500  | 2.06144000  | -1.66543800  |
| H | 3.17274200  | 2.26760800  | -1.32086100  |
| H | 1.06290100  | -0.11197800 | -3.63565500  |
| C | 1.72609300  | 0.71673000  | -1.02715700  |
| C | 2.38430000  | 0.47452100  | 0.32130600   |
| C | 0.20614100  | 0.55120900  | -0.91162100  |
| C | 1.99905100  | -0.87212800 | 0.92400100   |
| H | 2.08503400  | 1.30064600  | 0.98646200   |
| H | 3.47469200  | 0.54250300  | 0.19008400   |
| C | -0.16402100 | -0.81435300 | -0.34602900  |
| H | -0.17992300 | 1.34333400  | -0.24971600  |
| H | -0.26846800 | 0.71057400  | -1.89304200  |
| C | 0.48533900  | -1.02569000 | 1.01706600   |
| H | 2.46026600  | -0.98360800 | 1.91570200   |
| H | 2.40776900  | -1.67553900 | 0.29152100   |
| H | -1.25711900 | -0.90821600 | -0.27354000  |
| H | 0.18037600  | -1.59599300 | -1.04196400  |
| H | 0.22211700  | -2.01339100 | 1.42241100   |
| H | 0.08646800  | -0.27777100 | 1.72427300   |
| O | 2.25823700  | -0.24294000 | -1.94753000  |
| H | -1.02625700 | 1.26983400  | -4.52963100  |
| C | -0.06836700 | -0.04990200 | -7.30786600  |
| C | 0.93362500  | 0.46548100  | -8.34808200  |
| C | 0.40542700  | -1.43126000 | -6.79383000  |
| C | -1.45479500 | -0.20975700 | -7.95707400  |
| H | 1.92023600  | 0.59292000  | -7.87948400  |
| H | 0.62084300  | 1.46150100  | -8.70050600  |
| C | 1.01620600  | -0.51625100 | -9.51855200  |
| H | -0.29547900 | -1.80354000 | -6.03088400  |
| H | 1.39057600  | -1.32215300 | -6.31086600  |
| C | 0.49164800  | -2.40863200 | -7.96846300  |
| H | -1.81400600 | 0.77258500  | -8.30687000  |
| H | -2.17815900 | -0.57262700 | -7.21300500  |
| C | -1.36075100 | -1.18903900 | -9.12981800  |
| H | 1.73411300  | -0.13114400 | -10.25774300 |
| C | 1.48672200  | -1.87970900 | -9.00435100  |
| C | -0.36412400 | -0.66110600 | -10.16450900 |
| H | 0.82939800  | -3.38519200 | -7.59071400  |
| C | -0.88952900 | -2.55188700 | -8.61377400  |
| H | -2.35577600 | -1.29046000 | -9.58833300  |
| H | 2.48924200  | -1.79034900 | -8.55660700  |
| H | 1.57036600  | -2.59080800 | -9.84126000  |
| H | -0.70330200 | 0.31155900  | -10.55598900 |
| H | -0.31026900 | -1.35105400 | -11.02137700 |
| H | -0.84198400 | -3.27263800 | -9.44516300  |
| H | -1.61077400 | -2.95082200 | -7.88280100  |

TS3e

|                                  |              |
|----------------------------------|--------------|
| M06 SCF energy (au)              | -1702.162035 |
| M06 enthalpy (au)                | -1701.516149 |
| M06 free energy (au)             | -1701.610373 |
| M06 SCF energy in solution (au)  | -1702.608344 |
| M06 enthalpy in solution (au)    | -1701.962458 |
| M06 free energy in solution (au) | -1702.056682 |

Cartesian coordinates

| ATOM | X           | Y           | Z           |
|------|-------------|-------------|-------------|
| Pd   | 0.35556500  | 2.35444500  | -3.88702700 |
| C    | 0.96838800  | 0.74487600  | -6.15475700 |
| O    | 2.13679000  | 1.04451000  | -5.79243300 |
| O    | -0.06467200 | 1.12839500  | -5.51926400 |
| C    | 1.54832000  | 3.35929100  | -1.43094500 |
| O    | 1.72422400  | 4.00276000  | -0.40391500 |
| N    | 0.53878100  | 3.56911400  | -2.32945600 |
| C    | -0.51817400 | 4.45230800  | -2.14648200 |
| C    | -1.58613800 | 4.30011800  | -3.07667300 |
| C    | -0.64641300 | 5.43301600  | -1.17188900 |
| C    | -2.74540700 | 5.11325500  | -3.02551600 |
| C    | -1.80014600 | 6.24013300  | -1.12519000 |
| H    | 0.15017300  | 5.55963700  | -0.44774500 |
| C    | -2.40466600 | 3.11239500  | -4.91831600 |
| C    | -3.74415900 | 4.87202900  | -3.99509900 |
| C    | -2.83415300 | 6.10201200  | -2.02101200 |
| H    | -1.86299000 | 6.99959100  | -0.34737500 |
| C    | -3.58065900 | 3.88246300  | -4.93438300 |
| H    | -4.64660500 | 5.48343600  | -3.98325800 |
| H    | -3.71766400 | 6.73671100  | -1.97227200 |
| H    | -4.33961500 | 3.68271600  | -5.68615700 |
| N    | -1.45545100 | 3.32138200  | -4.02497400 |
| H    | -2.21894000 | 2.31306800  | -5.63573600 |
| C    | 2.36254500  | 1.56724200  | -3.20648900 |
| H    | 3.31570800  | 1.84572900  | -3.68314900 |
| C    | 2.34457500  | 0.04908500  | -2.94819500 |
| H    | 3.06193300  | -0.49322900 | -3.57685000 |
| C    | 2.42480500  | 2.18049300  | -1.78087400 |
| H    | 3.45898800  | 2.49979000  | -1.58373600 |
| H    | 1.34300900  | -0.38024500 | -3.14445900 |
| C    | 2.16733200  | 0.96110800  | -0.85349100 |
| C    | 2.94448300  | 1.05147400  | 0.45024900  |
| C    | 0.67968000  | 0.72188000  | -0.56923300 |
| C    | 2.72407800  | -0.16821500 | 1.33882000  |
| H    | 2.62810400  | 1.97259900  | 0.96463800  |
| H    | 4.01179100  | 1.16555100  | 0.20842500  |
| C    | 0.47350500  | -0.52174000 | 0.28732700  |
| H    | 0.28205500  | 1.60317400  | -0.03906900 |
| H    | 0.11343100  | 0.64722200  | -1.51111600 |
| C    | 1.24100200  | -0.40518200 | 1.59925200  |
| H    | 3.26753300  | -0.04145100 | 2.28583900  |
| H    | 3.15250800  | -1.05281900 | 0.84276400  |
| H    | -0.59879400 | -0.67231500 | 0.47650100  |
| H    | 0.82783300  | -1.40377800 | -0.26934200 |
| H    | 1.09696400  | -1.30605900 | 2.21278300  |
| H    | 0.83344600  | 0.44054600  | 2.18007400  |
| O    | 2.71446300  | -0.12519900 | -1.60294400 |
| H    | 1.97356900  | 1.62371400  | -4.51325200 |
| C    | 0.78031600  | -0.17333200 | -7.34291300 |
| C    | 1.80595700  | 0.13862600  | -8.44303500 |
| C    | 1.02583800  | -1.60971000 | -6.82868900 |

|   |             |             |              |
|---|-------------|-------------|--------------|
| C | -0.63636400 | -0.09185300 | -7.92405700  |
| H | 2.81973300  | 0.09304000  | -8.02103500  |
| H | 1.65633000  | 1.16923800  | -8.80496000  |
| C | 1.65293300  | -0.85629700 | -9.59534400  |
| H | 0.30538500  | -1.83713700 | -6.02492300  |
| H | 2.03539300  | -1.67078800 | -6.39169700  |
| C | 0.87423900  | -2.60457600 | -7.98175400  |
| H | -0.83463800 | 0.93586500  | -8.27156300  |
| H | -1.37259200 | -0.31028100 | -7.13625200  |
| C | -0.78357700 | -1.08436700 | -9.08017500  |
| H | 2.39031000  | -0.61837600 | -10.37698700 |
| C | 1.89535500  | -2.27594100 | -9.07448900  |
| C | 0.23839000  | -0.75878100 | -10.17244000 |
| H | 1.04969000  | -3.62286800 | -7.60248000  |
| C | -0.53983400 | -2.50432500 | -8.56041400  |
| H | -1.80216600 | -1.01136700 | -9.49113000  |
| H | 2.91839200  | -2.36231000 | -8.67482200  |
| H | 1.80896500  | -3.00121400 | -9.89944600  |
| H | 0.06037600  | 0.25470500  | -10.56727500 |
| H | 0.12452000  | -1.45760300 | -11.01673200 |
| H | -0.66388700 | -3.23244900 | -9.37799700  |
| H | -1.28403800 | -2.75739500 | -7.78807400  |

#### IM4e

|                                  |              |
|----------------------------------|--------------|
| M06 SCF energy (au)              | -1702.194930 |
| M06 enthalpy (au)                | -1701.542663 |
| M06 free energy (au)             | -1701.638190 |
| M06 SCF energy in solution (au)  | -1702.636738 |
| M06 enthalpy in solution (au)    | -1701.984471 |
| M06 free energy in solution (au) | -1702.079998 |

#### Cartesian coordinates

| ATOM | X           | Y           | Z           |
|------|-------------|-------------|-------------|
| Pd   | 0.02062500  | 2.12690100  | -4.05684200 |
| C    | 0.99457400  | 0.15813400  | -5.18462700 |
| O    | 1.10275600  | 0.29591300  | -3.92663600 |
| O    | 0.36158100  | 1.06602600  | -5.82543500 |
| C    | 0.22922800  | 2.56779300  | -1.04175400 |
| O    | -0.20143800 | 2.94830900  | 0.04278700  |
| N    | -0.25038900 | 3.03705900  | -2.25055200 |
| C    | -1.12071900 | 4.12600800  | -2.31837900 |
| C    | -1.52606100 | 4.48052500  | -3.63389400 |
| C    | -1.60104400 | 4.92792700  | -1.28559400 |
| C    | -2.35858300 | 5.59387000  | -3.91360900 |
| C    | -2.42953100 | 6.03341000  | -1.56032700 |
| H    | -1.33246200 | 4.69087400  | -0.26466800 |
| C    | -1.38166500 | 3.93077100  | -5.90980900 |
| C    | -2.67833400 | 5.83797000  | -5.26672600 |
| C    | -2.81218500 | 6.38021800  | -2.83443500 |
| H    | -2.77554700 | 6.62926000  | -0.71701200 |
| C    | -2.19604200 | 5.01907100  | -6.26035500 |
| H    | -3.31589800 | 6.68794900  | -5.50978100 |
| H    | -3.45501100 | 7.23773500  | -3.02633300 |
| H    | -2.43318000 | 5.19258400  | -7.30642900 |
| N    | -1.07043500 | 3.68997300  | -4.64781400 |
| H    | -0.97587800 | 3.23942300  | -6.64728200 |
| C    | 0.72806000  | 0.16665200  | -0.65809600 |
| H    | 1.29003100  | -0.65543900 | -1.12099300 |
| C    | 0.97171800  | 0.22705500  | 0.84028100  |
| H    | 1.05682300  | -0.76536200 | 1.30410400  |

|   |             |             |             |
|---|-------------|-------------|-------------|
| C | 1.30672800  | 1.51211700  | -1.12522400 |
| H | 1.68563300  | 1.44386900  | -2.14795600 |
| H | 0.16381600  | 0.78125400  | 1.34346100  |
| C | 2.50556800  | 1.68961100  | -0.15985500 |
| C | 3.75768800  | 1.09302800  | -0.81965800 |
| C | 2.80055600  | 3.12216300  | 0.27985000  |
| C | 4.96557400  | 1.13865200  | 0.10585300  |
| H | 3.97593700  | 1.67225500  | -1.73411700 |
| H | 3.54329700  | 0.06129500  | -1.13983800 |
| C | 4.02343100  | 3.19298000  | 1.18868600  |
| H | 2.97100700  | 3.73315100  | -0.62563200 |
| H | 1.91883600  | 3.52717700  | 0.78821400  |
| C | 5.25289900  | 2.57236500  | 0.53631000  |
| H | 5.84108500  | 0.69775700  | -0.39234200 |
| H | 4.75555900  | 0.52222100  | 0.99314100  |
| H | 4.21930500  | 4.23829100  | 1.46775800  |
| H | 3.79435400  | 2.65315500  | 2.12025500  |
| H | 6.11274100  | 2.60712400  | 1.22102200  |
| H | 5.53399700  | 3.16664200  | -0.35141100 |
| O | 2.20079200  | 0.90584500  | 1.00131400  |
| H | -0.32996400 | 0.04062500  | -0.92408600 |
| C | 1.55293800  | -1.03668200 | -5.90156900 |
| C | 2.27551900  | -0.59336800 | -7.18585800 |
| C | 2.52321500  | -1.82053600 | -5.00868800 |
| C | 0.37208400  | -1.95394000 | -6.29000100 |
| H | 3.10822300  | 0.08077000  | -6.92600100 |
| H | 1.58238400  | -0.02032400 | -7.81893900 |
| C | 2.80021600  | -1.82085600 | -7.93344700 |
| H | 2.01089300  | -2.12720700 | -4.08430200 |
| H | 3.35672800  | -1.16759000 | -4.70436500 |
| C | 3.04702900  | -3.04417700 | -5.76429300 |
| H | -0.33765800 | -1.39053000 | -6.91542400 |
| H | -0.16603900 | -2.26237800 | -5.37847900 |
| C | 0.89783900  | -3.18010800 | -7.03974500 |
| H | 3.31981500  | -1.49080100 | -8.84586300 |
| C | 3.77154600  | -2.59128100 | -7.03509500 |
| C | 1.62430300  | -2.72694200 | -8.30932700 |
| H | 3.74472900  | -3.59557200 | -5.11622600 |
| C | 1.87125700  | -3.94950700 | -6.14276600 |
| H | 0.04853200  | -3.82672900 | -7.30821000 |
| H | 4.63141400  | -1.95381200 | -6.77334000 |
| H | 4.17125200  | -3.46520200 | -7.57402600 |
| H | 0.92818200  | -2.18843200 | -8.97242400 |
| H | 1.98769700  | -3.60434900 | -8.86781200 |
| H | 2.23785300  | -4.84582300 | -6.66822300 |
| H | 1.35437800  | -4.29788500 | -5.23416400 |
